# Supplementary material for: Chromatin and gene expression changes during female Drosophila germline stem cell development illuminate the biology of highly potent stem cells
Source: eLife. 2023 Oct 13;12:RP90509. doi: 10.7554/eLife.90509 (PMC10575629; doi:10.7554/eLife.90509)
Supplement: Supplementary file 1. — (a) All processed data. (b) E(z)-dependent gene downregulation. (c) Mostly heterochromatic germline stem cell (GSC) genes with high H3K27ac. (d) Genes upregulated in young follicles relative to GSCs. (e) 41 membrane transporters upregulated more than 10-fold in young follicles. [file elife-90509-supp1.xlsx]

## Sheet: supplementary file 1a
Supplementary file 1a. All processed data
FBgn	GeneName	GSC_1_TPM	GSC_2_TPM	GSC_3_TPM	OVS6_1_TPM	OVS6_2_TPM	OVS6_3_TPM	EzOVS6_1_TPM	EzOVS6_2_TPM	EzOVS6_3_TPM	WTOV_1_TPM	WTOV_2_TPM	WTOV_3_TPM	S14_1_TPM	S14_2_TPM	S14_3_TPM	S14nfc_1_TPM	S14nfc_2_TPM	Stg14nfc_3_TPM	GSC_TPM_avg	GSC_TPM_stdev	OVS6_TPM_avg	OVS6_TPM_stdev	EzOVS6_TPM_avg	EzOVS6_TPM_stdev	WTOV_TPM_avg	WTOV_TPM_stdev	S14_TPM_avg	S14_TPM_stdev	S14nfc_TPM_avg	S14nfc_TPM_stdev	OVS6vGSC_log2FC	OVS6vGSC_padj	EzOVS6vGSC_log2FC	EzOVS6vGSC_padj	EzOVS6vOVS6_log2FC	EzOVS6vOVS6_padj	WTOVvOVS6_log2FC	WTOVvOVS6_padj	WTOVvGSC_log2FC	WTOVvGSC_padj	S14nfcvS14_log2FC	S14nfcvS14_padj	S14nfcvWTOV_log2FC	S14nfcvWTOV_padj	S14nfcvOVS6_log2FC	S14nfcvOVS6_padj	S14nfcvGSC_log2FC	S14nfcvGSC_padj
FBgn0267431	Myo81F	0.16	0.68	0.8	0	0	0.02	0.08	0.04	0.1	0	0	0	0.01	0	0.01	0.01	0.04	0.05	0.546667	0.340196	0.00666667	0.011547	0.0733333	0.0305505	0	0	0.00666667	0.0057735	0.0333333	0.0208167	-5.40577	6.8098e-10	-2.5694	7.12928e-05	2.79891	0.0274505	-1.6812	NA	-7.23054	2.2597e-07	2.31852	0.199025	2.98167	0.279431	1.25212	0.466658	-4.25862	5.0916e-07
FBgn0267430	Pzl	0.21	0.65	0.76	0	0.01	0.02	0.06	0.02	0.17	0	0.01	0.03	0	0.02	0	0	0	0.01	0.54	0.291033	0.01	0.01	0.0833333	0.0776745	0.0133333	0.0152753	0.00666667	0.011547	0.00333333	0.0057735	-4.88394	1.52585e-10	-2.2645	0.0025178	2.58394	0.0524833	-0.258203	0.918362	-5.36917	8.79449e-06	-1.02282	NA	-1.76782	0.609396	-2.03477	0.43838	-7.04633	2.10605e-07
FBgn0086917	spok	1.05	2.74	2.87	0	0	0.03	0.02	0.11	0.03	0	0.06	0	0.02	0	0	0.04	0	0	2.22	1.01533	0.01	0.0173205	0.0533333	0.0493288	0.02	0.034641	0.00666667	0.011547	0.0133333	0.023094	-7.31758	6.98322e-10	-5.05807	2.56366e-12	2.21052	0.514967	1.09056	NA	-6.36227	1.82571e-06	0.966955	NA	-0.782845	NA	0.262287	NA	-7.15308	6.92317e-08
FBgn0010247	Parp	52.26	133.31	110.52	51.39	66.57	96.52	60.04	62.78	94.48	90.15	96.49	80.14	90.8	93.03	98.45	111.76	79.84	102.67	98.6967	41.7986	71.4933	22.9643	72.4333	19.1421	88.9267	8.24336	94.0933	3.93429	98.09	16.4455	0.0592969	0.915284	-0.0806309	0.874752	-0.174701	0.780173	0.0257622	0.945252	-0.0647209	0.821333	-0.0842433	0.459068	-0.0945156	0.444223	-0.118901	0.718559	-0.166305	0.573505
FBgn0086378	Alg-2	78.17	163.38	143.5	79.36	94.54	98.55	88.21	84.17	93.52	86.72	76.81	83.82	101.29	94.45	98.96	93.15	75.85	88.08	128.35	44.5795	90.8167	10.1223	88.6333	4.68935	82.45	5.09507	98.2333	3.47742	85.6933	8.89352	0.015739	0.954359	-0.173345	0.47904	-0.222266	0.136702	-0.422381	0.000567145	-0.555314	0.0150967	-0.336664	1.36829e-05	-0.175679	0.0977207	-0.650471	4.7527e-08	-0.741721	0.00165026
FBgn0263977	Tim17b	215.26	301.9	277.16	305.96	363.38	362.78	320.59	323.49	325.36	389.26	408.47	412.35	360.49	346.8	365.64	386.93	294.46	364.04	264.773	44.6284	344.04	32.9796	323.147	2.40346	403.36	12.3641	357.643	9.73725	348.477	48.1595	0.882767	6.81658e-10	0.639951	3.19221e-07	-0.276358	0.0197179	-0.0529707	0.624817	0.681001	8.72691e-09	-0.180546	0.0445489	-0.444587	3.75021e-07	-0.548842	2.16416e-06	0.230346	0.12778
FBgn0069923	CG41128	29.62	109.6	94.87	80.01	132.65	171.95	79.33	75.48	133.69	252.76	223.82	277.95	279.62	246.35	260.61	208.63	174.57	192.71	78.03	42.5663	128.203	46.131	96.1667	32.5531	251.51	27.0866	262.193	16.6914	191.97	17.0421	1.24718	0.052786	0.674343	0.29478	-0.608231	0.319524	0.683193	0.00499358	1.7812	0.000855288	-0.586323	2.20179e-11	-0.616361	3.47803e-07	0.0105311	0.968641	1.14819	0.00258636
FBgn0039955	CG41099	55.11	92.67	85.97	78.05	89.55	100.88	71.33	72.9	84.23	225.41	228.53	213.37	197.01	198.28	213.1	241.12	183.19	229.77	77.9167	20.0332	89.4933	11.4151	76.1533	7.03851	222.437	8.00543	202.797	8.94551	218.027	30.6985	0.711819	0.000198251	0.324818	0.0847827	-0.420625	0.00476357	1.02994	1.08276e-21	1.59211	9.12384e-23	-0.0406233	0.687857	-0.264963	0.00197504	0.714269	2.14779e-08	1.3212	7.16027e-13
FBgn0259821	CG42402	1.88	1.99	3.04	0.35	0.26	0.29	0.64	0.39	0.64	0.19	0.02	0.08	0.1	0.02	0.07	0.37	0.4	0.43	2.30333	0.640338	0.3	0.0458258	0.556667	0.144338	0.0966667	0.0862168	0.0633333	0.0404145	0.4	0.03	-2.44931	3.05278e-16	-1.70428	1.83433e-08	0.71089	0.11818	-1.81457	0.0321027	-4.40544	4.01042e-15	2.45597	8.83521e-05	1.71718	0.0464866	-0.148486	0.754053	-2.70173	4.65929e-17
FBgn0027341	Gfat1	2.57	1.96	3.02	1.42	1.36	1.25	4.16	3.23	3.89	0.82	0.9	1.11	0.27	0.29	0.25	0.62	0.34	0.46	2.51667	0.532009	1.34333	0.0862168	3.76	0.478435	0.943333	0.149778	0.27	0.02	0.473333	0.140475	-0.413109	0.154381	0.920617	8.91615e-05	1.30234	9.98197e-11	-0.80473	0.038437	-1.36895	0.000102145	0.689994	0.244611	-1.20286	0.0263459	-2.04499	2.07626e-07	-2.55908	8.94573e-12
FBgn0058198	CG40198	0.12	0.37	0.28	0	0.04	0.02	0.02	0.04	0.04	0	0	0	0	0.07	0	0	0	0	0.256667	0.126623	0.02	0.02	0.0333333	0.011547	0	0	0.0233333	0.0404145	0	0	-3.04311	0.0535496	-2.60821	0.0936978	0.508539	NA	-0.191783	NA	-3.5112	0.0833838	-0.251148	NA	NA	NA	-1.00942	NA	-4.28573	0.0263681
FBgn0037213	CG12581	2.61	2.66	3.34	30.32	28.14	27.4	45.99	41.37	39.96	9.27	9.93	9.22	5.06	6.52	5.17	0.21	0.08	0.14	2.87	0.407799	28.62	1.51803	42.44	3.15419	9.47333	0.396274	5.58333	0.81304	0.143333	0.0650641	3.81361	9.93621e-190	4.22963	6.81664e-254	0.384193	4.48516e-05	-1.8725	2.97681e-79	1.78977	7.81079e-32	-5.40134	2.76311e-49	-6.2534	4.274e-71	-8.17853	2.10573e-134	-4.46753	7.23284e-29
FBgn0000500	Dsk	0.92	1.24	1.21	0.06	0.26	0.05	0.18	0.05	0.14	0	0.19	0	0.08	0.16	0	0	0	0	1.12333	0.17673	0.123333	0.118462	0.123333	0.0665833	0.0633333	0.109697	0.08	0.08	0	0	-2.66353	0.0180031	-2.83035	0.0054138	-0.176978	0.956628	-0.765126	NA	-3.62083	0.021399	-1.47668	NA	-1.6874	NA	-2.49944	0.4695	-5.31332	0.000637007
FBgn0037215	beta-Man	23.06	22.93	29.45	65.93	59.85	63.83	64.89	66.16	71.81	60.26	56.09	57.58	66.67	64.07	65.24	72.25	71.2	71.75	25.1467	3.72736	63.2033	3.08806	67.62	3.68379	57.9767	2.11311	65.3267	1.30216	71.7333	0.525198	1.8316	8.3631e-48	1.77723	1.32576e-48	-0.0871946	0.520224	-0.405732	5.6655e-06	1.27535	1.64649e-25	-0.0105833	0.850494	0.0722753	0.30662	-0.385171	7.7887e-07	1.34194	6.51801e-31
FBgn0037217	CG14636	1.34	0.88	1.58	0.17	0.4	0.24	1.07	0.59	0.91	0.71	0.34	0.48	0.06	0.14	0.13	0	0.09	0	1.26667	0.355715	0.27	0.117898	0.856667	0.244404	0.51	0.186815	0.11	0.043589	0.03	0.0519615	-1.72169	0.00409774	-0.233228	0.654937	1.45369	0.0288471	0.629461	0.514077	-1.25512	0.0484524	-2.51478	0.234025	-4.83128	0.00376639	-4.2457	0.0124622	-6.0853	6.27218e-06
FBgn0037218	aux	47.56	51.98	52.86	45.85	45.58	46.68	58.5	60.37	58.96	74.91	81.81	76.14	60.75	61.08	64.25	76.37	70.65	75.26	50.8	2.84021	46.0367	0.573265	59.2767	0.974389	77.62	3.68039	62.0267	1.93252	74.0933	3.03322	0.357759	0.000142898	0.570639	2.87861e-12	0.179763	0.0411295	0.472565	7.66173e-11	0.681169	5.4272e-20	0.112975	0.0183743	-0.301654	2.16344e-09	0.119658	0.0839512	0.375192	1.21665e-08
FBgn0051516	CG31516	1.18	1.43	1.19	0.06	0.08	0.08	0.15	0.18	0.18	0.28	0.18	0.31	0.07	0.02	0.07	0	0	0	1.26667	0.141539	0.0733333	0.011547	0.17	0.0173205	0.256667	0.0680686	0.0533333	0.0288675	0	0	-3.64952	8.61743e-09	-2.5522	4.53732e-07	1.06543	0.421821	1.54811	0.215004	-2.28383	0.000556788	-2.67646	NA	-4.97775	0.0116641	-3.46469	0.179691	-7.2293	3.16638e-08
FBgn0261436	DhpD	67.74	59.89	68.77	63.86	67.11	61.09	66	64.03	59.54	52.21	52.6	46.84	71.13	67.91	67.33	86.23	83.45	86.67	65.4667	4.85692	64.02	3.01319	63.19	3.31091	50.55	3.21887	68.79	2.04714	85.45	1.74597	0.46188	0.000119111	0.292244	0.0156582	-0.203054	0.0321427	-0.616993	6.27074e-12	-0.306077	0.0156023	0.16859	0.00469787	0.518265	7.69376e-12	-0.149355	0.0316647	0.21051	0.049979
FBgn0037220	CG14641	154.78	157.9	143.09	70.33	84.23	64.77	79.58	78.4	71.68	87.05	89.15	87.63	134.15	131.6	134.82	151.26	158.05	153.29	151.923	7.80733	73.11	10.0234	76.5533	4.26147	87.9433	1.0845	133.523	1.69901	154.2	3.48527	-0.564177	3.08242e-05	-0.646006	1.24525e-08	-0.115632	0.475433	-0.0112824	0.927491	-0.723059	1.03805e-12	0.0601598	0.255039	0.574262	2.00483e-20	0.512447	1.21907e-07	-0.151459	0.108379
FBgn0015331	abs	31.52	36.12	36.16	24.59	27.14	21.3	26.39	25.07	23.72	28.22	30.15	27.22	29.25	28.02	27.3	32.64	35.68	34.21	34.6	2.66743	24.3433	2.9278	25.06	1.33503	28.53	1.4894	28.19	0.986053	34.1767	1.52027	-0.010056	0.945199	-0.11771	0.290142	-0.140822	0.351796	-0.0464524	0.737165	-0.204741	0.0550046	0.128387	0.136116	0.0195817	0.868691	-0.0768328	0.520911	-0.189681	0.052037
FBgn0010225	Gel	20.81	26.65	27.21	41.76	33.54	35.87	31.45	33.05	37.92	20.9	18.72	19.9	11.62	13.49	11.6	3.25	3.56	3.73	24.89	3.54446	37.0567	4.23654	34.14	3.36991	19.84	1.09124	12.2367	1.08546	3.51333	0.243379	1.07828	1.83332e-14	0.809517	2.56006e-09	-0.301323	0.0394451	-1.18244	1.36181e-22	-0.253735	0.0580187	-1.94622	7.37141e-45	-2.73258	9.34978e-86	-3.96656	2.18498e-175	-2.99118	4.63025e-89
FBgn0037222	CG14642	2.76	2.33	2.46	0.25	0.15	0.25	0.28	0.42	0.32	0.18	0	0.28	0.03	0.03	0	0	0	0	2.51667	0.22053	0.216667	0.057735	0.34	0.072111	0.153333	0.141892	0.02	0.0173205	0	0	-3.06923	2.60157e-10	-2.53643	1.65258e-09	0.489979	0.670447	-0.874201	0.582045	-4.18952	1.08569e-06	-0.970234	NA	-3.85746	0.223916	-4.69823	0.0141086	-7.85033	7.23035e-10
FBgn0085334	CG34305	3.8	2.95	3.62	0.13	0	0.11	0.39	0.23	0.21	0	0	0	0	0.18	0	0	0	0	3.45667	0.447921	0.08	0.07	0.276667	0.0986577	0	0	0.06	0.103923	0	0	-5.04992	0.00018194	-3.32478	0.000234919	1.65342	NA	0.0174408	NA	-5.08505	0.000730871	0.177304	NA	NA	NA	-0.645443	NA	-5.69956	9.93312e-05
FBgn0037224	TwdlF	1.11	1.17	1.3	0.03	0	0.02	0.05	0.05	0.06	0	0.16	0.14	0	0.03	0.03	0	0	0	1.19333	0.0971253	0.0166667	0.0152753	0.0533333	0.0057735	0.1	0.087178	0.02	0.0173205	0	0	-5.88094	1.98395e-06	-4.15782	1.37125e-07	1.62068	NA	2.44715	NA	-3.50617	0.000958167	-0.874581	NA	-3.18109	0.400116	-0.807251	NA	-6.6817	7.29255e-07
FBgn0037225	TwdlG	0.99	0.88	1.25	0.27	0.34	0.29	0.72	0.67	0.68	0.28	0.43	0.89	0	0.08	0.05	0	0	0	1.04	0.19	0.3	0.0360555	0.69	0.0264575	0.533333	0.317857	0.0433333	0.0404145	0	0	-1.29806	0.00867963	-0.249976	0.581439	1.01487	0.0626377	0.470611	0.577612	-1.00921	0.0973811	-2.34005	NA	-5.94513	0.000322767	-5.48164	0.000595685	-6.88694	2.58891e-07
FBgn0250821	CG14644	0.12	0.23	0.33	0.44	0.23	0	0.36	0.4	0.47	0.46	0.61	0.18	0	0.04	0	0	0	0	0.226667	0.10504	0.223333	0.220076	0.41	0.0556776	0.416667	0.218251	0.0133333	0.023094	0	0	0.465583	0.774787	1.21437	0.185692	0.728688	0.692097	0.675593	0.685532	1.0081	0.360721	0.0132717	NA	-4.93989	0.0163218	-4.33497	0.114809	-3.96814	0.0567489
FBgn0037227	TwdlV	0.79	0.27	0.72	0.12	0.15	0.07	0.09	0.11	0.24	0.33	0.1	0.67	0.04	0	0	0	0	0	0.593333	0.282194	0.113333	0.0404145	0.146667	0.0814453	0.366667	0.286764	0.0133333	0.023094	0	0	-1.90689	0.0567161	-1.69793	0.0806322	0.168931	0.938978	1.33914	0.345845	-0.750508	0.478574	0.0211489	NA	-4.77913	0.0288462	-3.45296	0.184019	-5.46523	0.000778969
FBgn0041621	Or82a	0.07	0	0.16	0	0.06	0.02	0.7	0.43	0.5	0	0.26	0.15	0.04	0.04	0	0	0	0	0.0766667	0.0802081	0.0266667	0.0305505	0.543333	0.140119	0.136667	0.130512	0.0266667	0.023094	0	0	-0.943826	0.731407	3.15733	0.00232048	4.04225	0.000909095	2.04228	0.423563	0.938573	0.655457	-0.924496	NA	-3.5267	0.310381	-1.50903	NA	-2.58726	0.486729
FBgn0037228	CG1092	0.28	0.15	0.06	4.79	5.91	3.87	8.91	7.75	8.72	0.36	0.76	0.94	0.16	0	0.15	0	0	0	0.163333	0.110604	4.85667	1.02163	8.46	0.622174	0.686667	0.296873	0.103333	0.0896289	0	0	5.36457	2.2512e-27	6.0185	4.23094e-45	0.618022	0.00524518	-3.12838	5.25148e-12	2.10809	0.0252016	-3.3011	0.259211	-6.13369	0.000153704	-9.2949	7.74483e-14	-4.0138	0.0652008
FBgn0037229	CG9766	0.13	0.19	0.24	0.12	0.22	0.27	1.82	1.98	2.08	0.23	0.13	1.28	0.03	0	0.05	0	0	0	0.186667	0.0550757	0.203333	0.0763763	1.96	0.131149	0.546667	0.63705	0.0266667	0.0251661	0	0	0.669198	0.505376	3.74927	6.32111e-15	3.03997	7.34383e-12	1.04692	0.361999	1.55956	0.14247	-1.41475	NA	-5.89665	0.00166278	-4.85497	0.00959366	-4.29613	0.024215
FBgn0041605	cpx	3.33	2.72	5.37	0.62	0.84	0.72	1.47	1.3	1.99	0.32	0.46	0.85	0.18	0.15	0.09	0	0	0	3.80667	1.38782	0.726667	0.110151	1.58667	0.35949	0.543333	0.274651	0.14	0.0458258	0	0	-1.88419	2.14391e-10	-0.908356	0.00271215	0.940207	0.00155716	-0.766157	0.1191	-2.81656	2.45723e-12	-5.36354	0.000604656	-7.39314	1.88273e-07	-8.16863	1.73313e-10	-10.1628	3.83641e-16
FBgn0037230	CG9780	0.48	0.35	0.44	0.58	0.83	0.74	1.02	1.48	1.25	0.1	0.18	0	0.07	0.17	0.05	0	0	0.03	0.423333	0.0665833	0.716667	0.126623	1.25	0.23	0.0933333	0.090185	0.0966667	0.064291	0.01	0.0173205	1.24744	0.00872479	1.901	1.88492e-06	0.617158	0.141161	-3.03966	0.000622614	-1.95594	0.0462883	-2.96348	0.137548	-3.03728	0.255949	-6.25519	3.29278e-06	-5.10933	0.000320542
FBgn0037231	Vps24	38.27	47.58	50.96	35.22	38.44	37.35	39.64	43.24	42.26	71.97	75.15	68.04	95.48	85.23	91.88	101.19	94.64	107.71	45.6033	6.57187	37.0033	1.63775	41.7133	1.86122	71.72	3.56159	90.8633	5.20008	101.18	6.53501	0.202925	0.142168	0.224616	0.0961384	-0.011821	0.953351	0.675762	2.57205e-11	0.728219	2.30319e-09	0.0144251	0.870562	0.261719	0.00206779	0.886119	1.64289e-23	0.98427	6.22219e-17
FBgn0027930	MP1	4.76	5.09	4.96	13.93	14.9	16.43	18.14	15.19	19.43	7.75	5.91	5.39	6.18	6.71	6.83	2.33	2.69	3.68	4.93667	0.166233	15.0867	1.26041	17.5867	2.17348	6.35	1.24	6.57333	0.345881	2.9	0.699071	2.11572	2.47986e-35	2.18277	1.5635e-39	0.0330347	0.908299	-1.52612	1.00857e-13	0.439094	0.0713183	-1.30386	2.06834e-08	-1.35262	1.89837e-05	-2.9273	4.94131e-41	-0.91792	0.000569076
FBgn0037232	Suv3	20.48	24.33	21.64	26.69	35.29	27.55	26.46	25.6	21.64	21.8	22.47	19.26	14.18	15.25	15.88	16.24	19.03	17.76	22.15	1.97502	29.8433	4.73651	24.5667	2.57078	21.1767	1.69335	15.1033	0.859438	17.6767	1.39687	0.926573	1.29477e-10	0.496015	0.000154219	-0.464032	0.0024439	-0.769355	5.13719e-09	0.00995443	0.941421	0.0756138	0.50929	-0.504392	2.40289e-05	-1.32317	2.16345e-24	-0.498599	2.24709e-05
FBgn0261086	Syt14	3.69	5.25	4.76	0.09	0.12	0.19	0.29	0.24	0.32	0.16	0.07	0.13	0.1	0.16	0.15	0.17	0.18	0.14	4.56667	0.797768	0.133333	0.051316	0.283333	0.0404145	0.12	0.0458258	0.136667	0.0321455	0.163333	0.0208167	-4.55825	1.46091e-47	-3.66477	9.895e-50	0.874349	0.212686	-0.447556	0.707751	-5.21061	6.42751e-20	0.0649669	0.949291	0.192659	0.881138	-0.312445	0.727583	-5.03037	4.27499e-32
FBgn0037234	CG9795	40.87	48.4	48.22	23.34	22.04	24.48	28.31	27.76	31.81	64.38	66.81	58.89	60.11	57.97	63.12	75.34	73.5	75.53	45.83	4.29643	23.2867	1.22087	29.2933	2.19678	63.36	4.05733	60.4	2.58722	74.79	1.1212	-0.474107	7.54767e-05	-0.295472	0.010875	0.145349	0.328853	1.16337	8.69248e-32	0.540057	3.11261e-08	0.163567	0.00151158	0.000892571	0.991482	1.11514	1.39485e-38	0.538102	1.50376e-11
FBgn0027866	CG9776	122.8	133.06	133.21	57.83	56.38	48.24	58.83	59.04	52.29	92.56	95.78	88.74	56.42	60.63	64.82	75.9	64.59	72.63	129.69	5.96739	54.15	5.1693	56.72	3.83793	92.36	3.52426	60.6233	4.2	71.04	5.82023	-0.764038	1.92502e-14	-0.846586	3.30402e-20	-0.115052	0.386819	0.492619	1.55707e-09	-0.420068	1.43096e-08	0.0852879	0.28513	-0.612945	3.95316e-23	-0.172796	0.0637446	-1.0379	4.24813e-38
FBgn0037236	Skp2	87.66	87.54	90.52	60.2	53.58	54.71	61.58	61.57	54.26	101.1	109.24	106.34	135.54	136.9	144.17	171.7	156.78	164.04	88.5733	1.68693	56.1633	3.54122	59.1367	4.22332	105.56	4.12568	138.87	4.64003	164.173	7.46089	-0.160793	0.169153	-0.237992	0.0257774	-0.109514	0.433602	0.629515	8.03757e-14	0.319573	0.000153041	0.097815	0.0618379	0.40381	4.0957e-13	0.981158	6.29827e-35	0.718767	1.01119e-22
FBgn0040687	CG14645	2.19	0	0	0	5.5	0	0.01	0	0.16	0	1.47	0	2.09	4.12	0	2.67	0	2	0.73	1.2644	1.83333	3.17543	0.0566667	0.0896289	0.49	0.848705	2.07	2.06007	1.55667	1.38911	1.73284	NA	-3.60897	0.226402	-5.41958	NA	-2.20938	NA	-0.587402	0.837931	-0.539022	0.735345	1.42303	0.496525	-0.793508	0.840055	0.880198	0.683988
FBgn0037235	CG1103	42.83	51.17	48.73	62.19	57.51	62.19	80.38	80.2	77.71	116.22	121.55	120.88	127.5	125.57	127.54	124.14	125.81	128.11	47.5767	4.28795	60.63	2.702	79.43	1.49228	119.55	2.90326	126.87	1.12601	126.02	1.99331	0.851424	4.74729e-13	1.08857	5.47002e-29	0.204492	0.0536037	0.697257	4.29247e-15	1.39967	5.50451e-55	-0.155584	0.00183432	-0.158175	0.0135296	0.487603	7.11612e-09	1.23677	1.00474e-50
FBgn0261434	hkb	0.29	0.37	0.23	0.24	0.47	0.72	0.51	0.37	0.27	1.25	1.58	1.45	0.03	0	0	0	0	0	0.296667	0.0702377	0.476667	0.240069	0.383333	0.120554	1.42667	0.166233	0.01	0.0173205	0	0	1.21211	0.115274	0.715537	0.329095	-0.532574	0.590637	1.27822	0.0406746	2.35123	1.06464e-05	0.00816821	NA	-7.37186	7.53341e-08	-6.1392	8.22579e-05	-5.03464	0.00226965
FBgn0037238	CG1090	1.14	1.61	2.11	0.7	0.72	0.84	1.05	0.81	1.04	1.47	0.73	1.81	0.01	0.08	0.06	0	0	0	1.62	0.485077	0.753333	0.0757188	0.966667	0.135769	1.33667	0.552208	0.05	0.0360555	0	0	-0.589456	0.0766206	-0.388252	0.231256	0.168852	0.70695	0.519213	0.24367	-0.221386	0.605917	-3.63885	0.120496	-8.41772	2.43744e-10	-7.93534	7.41483e-10	-8.63176	9.24266e-12
FBgn0037239	Sfxn1-3	4.85	4.51	6.23	54.14	52.89	56.56	53.16	49.78	52.59	49.58	51.98	41.88	77.25	77.27	76.36	78.77	83.5	76.98	5.19667	0.910897	54.53	1.86582	51.8433	1.80948	47.8133	5.27668	76.96	0.519711	79.75	3.36866	3.88773	6.56107e-145	3.66089	3.2774e-148	-0.258863	0.0127499	-0.465385	8.45309e-05	3.26962	7.42944e-85	-0.0990974	0.167134	0.494308	1.62814e-06	-0.0218061	0.830491	3.76159	3.32595e-153
FBgn0037240	Cont	41.31	46.71	51.61	31.2	28.41	26.71	34.49	36.29	35.11	64.95	68.57	62.51	66.98	65.66	71.87	72.59	66.42	73.53	46.5433	5.15202	28.7733	2.26694	35.2967	0.914403	65.3433	3.04909	68.17	3.27156	70.8467	3.86231	-0.193155	0.0942838	-0.0481287	0.665376	0.112617	0.325232	0.904635	7.04759e-29	0.561333	1.97199e-09	-0.0874723	0.119949	-0.118332	0.0371144	0.734499	1.9302e-20	0.437871	2.63942e-06
FBgn0003882	tub	111.45	120.54	121.45	60.17	64.44	61.2	63.53	63.85	66.02	83.15	83.5	82.23	105.63	101.65	107.55	132.46	122.17	127.18	117.813	5.52956	61.9367	2.22828	64.4667	1.35471	82.96	0.655973	104.943	3.00934	127.27	5.14559	-0.429222	2.48779e-06	-0.522225	6.9739e-10	-0.126642	0.189594	0.141221	0.0748463	-0.436833	6.95806e-09	0.134585	0.00690596	0.383359	1.13738e-11	0.472746	3.15824e-13	-0.0583171	0.406795
FBgn0037241	CG14646	51.76	63.11	62.45	21.21	23.92	23.72	27.38	25.62	32.44	32.91	34.55	32.37	23.83	27.91	26.4	29.46	31.61	30.35	59.1067	6.37095	22.95	1.5102	28.48	3.54056	33.2767	1.13531	26.0467	2.06282	30.4733	1.08029	-0.862309	1.60821e-12	-0.702436	2.66695e-07	0.125841	0.52255	0.256155	0.0339518	-0.755007	1.55568e-12	0.0777813	0.490008	-0.367959	0.000344339	-0.161644	0.165715	-1.12693	1.30554e-27
FBgn0086608	CG34112	7.33	5.99	9.36	2.38	1.67	1.77	5.59	3.58	4.51	1.25	1.45	2.61	1.8	1.6	1.19	0.65	0	0	7.56	1.69673	1.94	0.384318	4.56	1.00593	1.77	0.734302	1.53	0.310966	0.216667	0.375278	-1.47334	3.98197e-06	-0.384883	0.207756	1.0577	0.00232067	-0.443411	0.451979	-2.08385	3.18504e-07	-2.95063	0.0022742	-3.26808	0.00635674	-3.72018	0.000136328	-5.30072	0.000347861
FBgn0037242	CG9855	70.85	97.15	89.98	43.8	45.19	45.85	52.73	53.18	56.96	84.24	87.61	84.53	97.07	99.98	100.62	132.2	127.35	129.51	85.9933	13.5957	44.9467	1.04644	54.29	2.32321	85.46	1.86759	99.2233	1.8921	129.687	2.42982	-0.431615	0.00117421	-0.311159	0.0194042	0.0872325	0.507737	0.645419	5.65482e-15	0.0646171	0.60845	0.241234	5.73726e-07	0.366474	1.51531e-10	0.960834	2.59868e-42	0.42662	0.000225995
FBgn0086605	CG9853	97.3	111.86	102.38	71.28	84.49	66.26	79.46	78.14	69.45	69.4	71.23	79.76	102.09	98.27	100.88	108.85	112.96	105.98	103.847	7.38998	74.01	9.41663	75.6833	5.43842	73.4633	5.52931	100.413	1.95229	109.263	3.50831	0.00679929	0.963387	-0.110016	0.355765	-0.150167	0.325744	-0.292449	0.010008	-0.434132	3.07305e-05	-0.0271457	0.690633	0.341795	0.000103697	-0.00314805	0.976937	-0.0976334	0.274562
FBgn0037244	CG14647	93.49	106.05	100.33	63.32	68.27	54.1	88.75	86.92	70.98	81.1	86.02	89.15	58.45	60.97	62.63	73.47	72.71	72.01	99.9567	6.28832	61.8967	7.19143	82.2167	9.77416	85.4233	4.05803	60.6833	2.10469	72.73	0.730205	-0.19621	0.118365	0.0641903	0.649301	0.227942	0.145996	0.185305	0.0919737	-0.159595	0.0940239	0.114433	0.116176	-0.465456	5.86656e-09	-0.332117	0.00096479	-0.62964	1.46522e-15
FBgn0263594	lost	157.51	217.12	233.41	1098.35	1045.93	1248.62	972.16	997.56	1120.9	896.8	898.84	849.62	1018.72	1031.64	1076.9	867.31	761.68	852.34	202.68	39.9573	1130.97	105.208	1030.21	79.5629	881.753	27.847	1042.42	30.5513	827.11	57.1563	2.99052	1.66778e-89	2.70154	8.34174e-85	-0.322017	0.0147107	-0.642945	1.50033e-11	2.19734	9.50157e-67	-0.478764	1.70178e-22	-0.327675	1.05981e-11	-1.02172	2.70335e-26	1.86376	1.77406e-43
FBgn0052944	CG32944	3.62	2.6	2.85	0.38	0.49	0.36	0.67	1.24	1	0.86	0.29	0.26	0.31	0.28	0.24	0.04	0	0.06	3.02333	0.531633	0.41	0.07	0.97	0.286182	0.47	0.338083	0.276667	0.0351188	0.0333333	0.0305505	-2.38978	1.92519e-12	-1.29386	0.000143766	1.06196	0.028916	-0.0455427	0.958368	-2.57054	1.62977e-07	-3.03641	0.0130296	-3.92766	0.00360976	-4.01478	0.000409728	-6.47425	1.63676e-12
FBgn0051528	CG31528	5.95	4.82	5.43	0.31	0.24	0.27	0.58	0.98	0.37	0.19	0	0.43	0.03	0.03	0	0	0	0	5.4	0.565597	0.273333	0.0351188	0.643333	0.309892	0.206667	0.215484	0.02	0.0173205	0	0	-3.82393	6.56606e-23	-2.73237	5.45133e-12	1.05506	0.219238	-0.796828	0.587846	-4.90603	2.9193e-11	-0.926659	NA	-4.18884	0.152454	-4.94281	0.00621748	-8.85598	1.0446e-12
FBgn0037248	srl	54.04	72.89	70.27	146.39	174.62	153.02	136.73	132.11	133.36	224.89	239.11	220.25	311.26	300.49	329.03	346.91	296.42	334.7	65.7333	10.2111	158.01	14.7617	134.067	2.38969	228.083	9.82715	313.593	14.4124	326.01	26.3429	1.76783	9.81105e-46	1.38028	9.11362e-35	-0.4209	4.003e-06	0.249963	0.00198721	1.86851	4.66105e-67	-0.0886029	0.162491	0.280157	4.26728e-07	0.478992	8.84111e-09	2.14362	1.54437e-76
FBgn0051525	CG31525	2.03	2.02	3.83	5.29	6.74	6.36	5.11	4.65	5.82	1	0.95	1.97	1.19	1.12	1.04	0	0	0.11	2.62667	1.04213	6.13	0.751864	5.19333	0.589435	1.30667	0.575007	1.11667	0.0750555	0.0366667	0.0635085	1.72644	3.76554e-08	1.3361	2.85514e-05	-0.425156	0.0869775	-2.58519	4.1646e-11	-0.984537	0.0639331	-4.71894	0.00010541	-5.03418	0.000166658	-7.57425	8.28242e-13	-5.97001	2.31314e-07
FBgn0037249	eIF3a	211.3	225.77	221.83	368.84	390.1	305.2	320.74	329.83	273.15	301.52	309.32	289.94	231.44	236.88	235.38	334.33	327.56	325.38	219.633	7.48092	354.713	44.1778	307.907	30.4414	300.26	9.75125	234.567	2.80972	329.09	4.66704	1.18546	1.22897e-27	0.833241	4.95896e-15	-0.384847	0.00197653	-0.517618	9.31708e-10	0.519384	2.54671e-13	0.343213	1.64363e-21	-0.103163	0.00967885	-0.671733	4.65363e-16	0.412657	5.68963e-14
FBgn0037250	CG1074	25.02	34.05	31.47	56.05	63.91	49.75	54.44	57.74	45.05	58.87	59.51	63.6	77.48	73.87	77.23	98.79	89.75	91.36	30.18	4.65116	56.57	7.09431	52.41	6.58405	60.66	2.56614	76.1933	2.01594	93.3	4.82215	1.4065	5.25833e-24	1.14747	1.03783e-14	-0.291517	0.0616606	-0.179473	0.10631	1.07894	2.1436e-18	0.148247	0.0155881	0.390979	3.17347e-07	0.158173	0.124154	1.46257	2.10638e-35
FBgn0037251	CG9804	29.1	44.82	49.13	17.84	19.04	27.89	20.1	16.66	28.19	30.43	31.05	32	37.37	32.6	34.56	20.28	24.67	27	41.0167	10.5427	21.59	5.48885	21.65	5.91921	31.16	0.790759	34.8433	2.39759	23.9833	3.41222	-0.407734	0.119305	-0.562201	0.0267241	-0.188886	0.638541	0.239771	0.300482	-0.318937	0.110445	-0.685524	3.24619e-07	-0.612227	0.000202808	-0.423355	0.0751961	-0.938057	1.5825e-05
FBgn0037252	CG14650	72.61	74.79	82.49	30.27	28.47	28.15	36.18	35.61	37.42	56.84	60.41	57.89	74.55	71.16	74.98	90.95	88.8	91.82	76.63	5.19065	28.9633	1.14286	36.4033	0.925437	58.38	1.83475	73.5633	2.09242	90.5233	1.55455	-0.905076	1.22186e-21	-0.725851	4.49501e-17	0.146361	0.111378	0.73119	9.57196e-23	-0.323631	8.68875e-05	0.154705	0.000197657	0.398	3.02524e-16	1.07791	2.2835e-62	0.0698926	0.3665
FBgn0051522	CG31522	13.58	14.14	18.87	16.26	23.86	19.42	27.6	24.27	34.06	39.37	46.42	36.54	21.15	22	21.4	18.31	13.77	17.39	15.53	2.90605	19.8467	3.81792	28.6433	4.97769	40.7767	5.08799	21.5167	0.436845	16.49	2.40008	0.856088	3.18646e-06	1.2354	1.47442e-12	0.344107	0.10899	0.759877	4.27342e-07	1.46501	2.00864e-21	-0.519139	1.20228e-06	-1.53643	6.82086e-36	-0.829671	4.77201e-07	-0.0794803	0.663878
FBgn0051523	CG31523	28.82	41.09	42.74	51.58	57.32	66.76	55.34	57.54	65.02	127.16	128.06	127.32	126.25	125.28	129.34	120.32	104.23	117.33	37.55	7.60528	58.5533	7.66479	59.3	5.07433	127.513	0.480139	126.957	2.12024	113.96	8.55802	1.15159	1.00903e-11	1.01547	1.84354e-11	-0.169788	0.367847	0.838524	1.08256e-13	1.84009	1.49074e-43	-0.298461	5.16404e-08	-0.395092	9.23951e-12	0.390867	0.00105233	1.43716	1.03237e-23
FBgn0037254	CG14651	0.74	0.67	0.76	0.01	0.07	0	0.03	0.08	0.05	0.03	0.03	0.1	0.03	0.05	0	0.11	0.15	0.04	0.723333	0.0472582	0.0266667	0.0378594	0.0533333	0.0251661	0.0533333	0.0404145	0.0266667	0.0251661	0.1	0.0556776	-4.23776	6.63282e-07	-3.45483	7.63358e-10	0.786834	0.762707	0.699869	0.759209	-3.86658	9.98492e-06	1.65314	0.259009	0.684334	0.671059	1.3043	0.454141	-3.19924	2.56647e-07
FBgn0037255	Fip1	84.64	88.45	84.07	45.43	51.98	37.16	54.78	52.79	46.03	70.78	72.97	66.29	79.22	72.05	75.68	93.45	93.72	97.29	85.72	2.38137	44.8567	7.42662	51.2	4.58658	70.0133	3.40535	75.65	3.58509	94.82	2.14334	-0.442869	0.0015182	-0.399423	0.000402698	0.0103846	0.967333	0.366985	0.00178657	-0.223401	0.0179697	0.181029	0.000954498	0.199816	0.00106789	0.517125	2.4668e-06	-0.0258988	0.731117
FBgn0085386	CG34357	4.95	4.47	5.87	0.25	0.23	0.23	0.77	0.65	0.72	0.15	0.08	0.08	0.02	0.02	0.06	0.07	0.11	0.05	5.09667	0.71143	0.236667	0.011547	0.713333	0.0602771	0.103333	0.0404145	0.0333333	0.023094	0.0766667	0.0305505	-3.93386	3.98568e-63	-2.4835	1.61427e-44	1.41482	1.32987e-05	-1.55463	0.0390651	-5.6824	8.7679e-39	0.825668	0.522982	-0.76483	0.501835	-2.40432	0.000977615	-6.53142	7.43165e-48
FBgn0085454	CG34425	0.84	0.3	0.49	0.04	0	0	0.02	0	0	0	0	0	0	0	0	0	0	0.04	0.543333	0.273922	0.0133333	0.023094	0.00666667	0.011547	0	0	0	0	0.0133333	0.023094	-5.25161	0.000219548	-6.27766	2.98595e-05	-1.2085	NA	-0.0879032	NA	-5.32843	0.000574918	1.9289	NA	0.1791	NA	0.033003	NA	-5.15062	0.000530304
FBgn0037260	Mur82C	0.85	1.2	1.63	0.12	0.06	0.01	0.19	0.17	0.08	0	0	0	0.07	0.02	0.04	0.13	0	0.14	1.22667	0.390683	0.0633333	0.0550757	0.146667	0.0585947	0	0	0.0433333	0.0251661	0.09	0.0781025	-3.75599	3.08174e-07	-2.72178	1.86957e-06	0.998611	0.552754	-2.6175	NA	-6.4917	1.49636e-06	0.972434	0.583624	2.57863	0.475175	-0.0278171	0.987968	-3.74137	1.41452e-06
FBgn0052945	CG32945	0.17	0.42	0.74	0	0	0	0.05	0.08	0	0	0	0	0	0	0	0	0	0	0.443333	0.285715	0	0	0.0433333	0.0404145	0	0	0	0	0	0	-5.41877	0.0102924	-3.02211	0.0643495	2.39212	NA	NA	NA	-3.5809	0.0832564	NA	NA	NA	NA	NA	NA	-4.33563	0.0287771
FBgn0087012	5-HT2A	0.51	1.07	1.19	0.92	0.85	0.82	1.35	0.83	1.27	0.09	0.05	0	0.07	0.08	0.11	0	0	0	0.923333	0.362951	0.863333	0.051316	1.15	0.28	0.0466667	0.0450925	0.0866667	0.0208167	0	0	0.414971	0.299923	0.678662	0.088263	0.23219	0.583822	-4.25739	1.05959e-07	-3.99937	2.52036e-06	-4.51347	0.0110267	-3.85264	0.22175	-8.27213	7.21383e-11	-7.96392	1.43509e-09
FBgn0037261	CG9775	96.72	98.2	94.12	77.12	79.55	74.51	85.94	83.25	86.11	96.85	99.84	102.16	154.66	147.78	148.59	169.6	163.75	173.64	96.3467	2.06546	77.06	2.52054	85.1	1.6044	99.6167	2.66204	150.343	3.76022	168.997	4.97253	0.172556	0.1136	0.165286	0.108674	-0.0408015	0.700759	0.0888956	0.234619	0.113552	0.225416	0.0247817	0.635898	0.530846	2.77234e-24	0.567228	1.77447e-24	0.638886	3.56611e-18
FBgn0037263	slx1	30.94	35.19	34.57	8.52	6.2	6.77	11.27	12.66	10.97	10.2	10.01	10.48	16.49	15.79	16.28	16.24	18.96	17.55	33.5667	2.29579	7.16333	1.20898	11.6333	0.901684	10.23	0.236432	16.1867	0.359212	17.5833	1.36031	-1.73228	9.91066e-24	-1.17988	1.2342e-18	0.52	0.0138902	0.233572	0.356201	-1.64803	2.56415e-28	-0.035795	0.815599	0.544695	0.004796	0.726959	0.000294914	-1.11132	4.31571e-19
FBgn0037262	MED31	278	234.51	258.62	47.3	51.04	46.17	60.69	62.41	60.69	71.36	78.67	64.54	123.15	111.69	117.56	136.61	152.18	140.17	257.043	21.7878	48.17	2.5489	61.2633	0.993042	71.5233	7.06642	117.467	5.73057	142.987	8.15821	-1.9239	5.89437e-50	-1.72678	3.13796e-44	0.162919	0.130523	0.294562	0.00934887	-1.77965	6.59095e-40	0.13386	0.0849375	0.757771	9.86373e-15	1.00054	9.51523e-30	-1.02228	4.50339e-17
FBgn0040466	Dlip2	28.34	48.22	40.64	18.34	19.84	23.38	24.23	16.17	25.63	42.22	37.44	47.01	64.16	66.13	68.53	60.2	65.47	65.17	39.0667	10.033	20.52	2.58789	22.01	5.1058	42.2233	4.785	66.2733	2.18852	63.6133	2.95984	-0.417572	0.0637933	-0.473514	0.055829	-0.0891583	0.807891	0.751782	1.23358e-05	0.186953	0.374839	-0.207937	0.0123604	0.363349	0.00710178	1.06121	1.05548e-13	0.540986	0.00417148
FBgn0022981	rpk	11.28	24.27	19.17	110.39	110.73	118.85	94.05	104.56	104.31	155.27	153.73	150.2	187.63	177.9	191.19	194.39	178.94	187.41	18.24	6.54475	113.323	4.78925	100.973	5.99709	153.067	2.59928	185.573	6.87957	186.913	7.73697	3.14878	1.0343e-47	2.82949	2.73275e-38	-0.351734	0.000920475	0.151747	0.0740771	3.15128	5.25768e-50	-0.133527	0.00386198	0.0536425	0.307559	0.153943	0.0492091	3.19849	3.68038e-48
FBgn0087013	Karybeta3	145.24	196.77	173.67	505.44	498.01	465.37	566.58	570.11	513.84	343.18	348.19	352.07	182.41	212.14	203.44	153.17	148.55	153.93	171.893	25.8109	489.607	21.3158	550.177	31.5179	347.813	4.45695	199.33	15.2852	151.883	2.91165	2.01129	8.1302e-68	2.02855	1.30625e-66	-0.0150737	0.915808	-0.773459	4.50645e-47	1.08934	4.86321e-25	-0.537498	2.56143e-18	-1.42971	0	-2.25471	0	-0.345281	0.00132444
FBgn0037265	spartin	4.22	6.29	5.34	9.68	7.44	7.79	10.64	10.86	11.59	17.72	14.12	14.97	7.92	8.98	9.38	10.63	8.93	9.21	5.28333	1.03616	8.30333	1.205	11.03	0.497293	15.6033	1.88171	8.76	0.754453	9.59	0.911482	1.1569	1.64638e-08	1.41733	1.83209e-16	0.229009	0.22764	0.633208	0.000373443	1.64104	3.7715e-18	-0.0117246	0.947647	-0.936927	4.54132e-09	-0.356006	0.0477295	0.69858	0.000221721
FBgn0263346	CG43427	46.83	57.48	64.23	38.23	35.49	33.49	43.97	43.03	45.59	58.19	56.7	56.63	50.8	52.69	54.4	68.38	62.9	68	56.18	8.77254	35.7367	2.37961	44.1967	1.29496	57.1733	0.881155	52.63	1.80075	66.4267	3.06009	-0.149176	0.251023	0.00686519	0.959574	0.123636	0.197993	0.398621	8.79156e-08	0.0992238	0.395684	0.192131	7.09845e-05	-0.0174284	0.761076	0.328699	5.16429e-06	0.0750415	0.531957
FBgn0053927	CG33927	0	0.09	0.21	0.06	0.27	0.2	0.37	0.17	0.15	0	0	0.35	0	0	0	0	0	0	0.1	0.105357	0.176667	0.106927	0.23	0.121655	0.116667	0.202073	0	0	0	0	1.36096	0.521499	1.5345	0.419507	0.133112	0.95876	-1.2655	NA	-0.0551146	NA	NA	NA	-1.68377	NA	-2.99531	0.317297	-1.74713	NA
FBgn0037270	eIF3f1	376	316.24	351.42	424.55	411.68	343.88	408.04	398.64	339.65	178.68	197.6	202.23	359.63	343.87	336.64	322.72	363.27	335.28	347.887	30.0363	393.37	43.34	382.11	37.0706	192.837	12.4767	346.713	11.7558	340.423	20.7585	0.667364	1.06347e-06	0.476528	0.0004524	-0.223447	0.0860388	-1.30813	9.13611e-51	-0.78913	8.82116e-11	-0.17282	0.0085644	0.586703	8.78012e-15	-0.773066	4.03551e-17	-0.20587	0.0988916
FBgn0027570	Nep2	17.23	14.56	17.86	2.87	5.85	3.09	12.45	10.86	14.53	46.34	43.36	58.75	3.57	3.18	3.23	0.22	0.32	0.14	16.55	1.75194	3.93667	1.66064	12.6133	1.84044	49.4833	8.16232	3.32667	0.212211	0.226667	0.090185	-1.58265	1.87943e-09	-0.0469422	0.807137	1.49882	1.79936e-08	3.378	1.04194e-22	1.64266	3.80576e-25	-4.14006	4.17437e-29	-8.13577	3.8182e-132	-4.76535	9.63372e-26	-6.48923	1.13761e-78
FBgn0026620	tacc	99.31	146.54	124.55	76.25	80.2	76.08	97.9	85.06	93.35	141.64	150.05	130.68	120.16	120.5	127.91	135.4	111.02	126.37	123.467	23.6336	77.51	2.33116	92.1033	6.51015	140.79	9.71293	122.857	4.37962	124.263	12.3258	-0.168387	0.263799	-0.0717928	0.654524	0.0637722	0.600053	0.581497	1.97146e-15	0.263739	0.0586855	-0.127842	0.0726398	-0.415517	6.86886e-09	0.114414	0.177215	-0.156596	0.293354
FBgn0010750	atms	147.74	163.5	159.32	56.76	60.25	45.02	66.2	67.17	56.5	65.06	67.85	66.62	101.76	95.37	98.16	115.03	121.01	118.49	156.853	8.16442	54.01	7.97873	63.29	5.90028	66.51	1.39825	98.43	3.20354	118.177	3.00229	-1.04402	2.53709e-17	-0.962921	1.51433e-19	0.0484806	0.829066	0.0235346	0.857958	-1.16894	1.58885e-51	0.116737	0.0395772	0.593819	1.11709e-19	0.566381	8.74693e-08	-0.579527	1.98326e-17
FBgn0264907	CG44098	0.65	0.57	0.73	0.3	0.35	0.37	2.08	2.21	1.77	0.92	1.38	2.15	0.14	0.1	0.09	0	0	0	0.65	0.08	0.34	0.0360555	2.02	0.226053	1.48333	0.621477	0.11	0.0264575	0	0	-0.435613	0.294401	1.97212	1.70271e-15	2.3747	1.04296e-20	1.81285	1.25775e-05	1.22405	0.00145534	-4.96054	0.00283223	-8.78667	1.67211e-11	-7.01465	2.95614e-07	-7.55466	5.22428e-09
FBgn0264897	CG44088	0.53	0.66	1.29	0	0	0	0.06	0.11	0	0	0	0	0	0	0	0	0	0	0.826667	0.406489	0	0	0.0566667	0.0550757	0	0	0	0	0	0	-5.87589	0.00165732	-3.48259	0.0162444	2.39212	NA	NA	NA	-4.03698	0.0277884	NA	NA	NA	NA	NA	NA	-4.76591	0.00675761
FBgn0037275	CG14655	7.32	7.53	7.55	2.68	1.88	2.12	3.11	2.72	3.23	1.54	1.69	1.37	2.09	1.75	1.4	0.93	0.06	1.39	7.46667	0.12741	2.22667	0.410528	3.02	0.266646	1.53333	0.160104	1.74667	0.345012	0.793333	0.67545	-1.25206	4.8847e-09	-0.958817	1.73019e-08	0.260172	0.41185	-0.804518	0.0229947	-2.1965	4.80809e-20	-1.23084	0.0474246	-1.15563	0.131555	-2.00919	0.00105187	-3.38661	0.000214379
FBgn0037276	CG17387	1.06	0.5	0.85	0.11	0.13	0.18	0.19	0.22	0.18	0.04	0.16	0	0.01	0.03	0.02	0	0	0	0.803333	0.282902	0.14	0.0360555	0.196667	0.0208167	0.0666667	0.0832666	0.02	0.01	0	0	-2.0634	0.000180705	-1.69827	0.000556875	0.331299	0.737539	-1.25844	0.35654	-3.4047	9.74695e-05	-2.22098	NA	-3.94853	0.209675	-5.35849	0.00149514	-7.52543	1.82763e-08
FBgn0260794	ctrip	100.56	112.45	124.67	76.16	76.16	74.8	104.57	101.41	101.21	175.55	195.72	183.4	155.15	158.67	165.68	230.61	211.97	214.08	112.56	12.0554	75.7067	0.785196	102.397	1.88482	184.89	10.1672	159.833	5.36053	218.887	10.2074	-0.0704142	0.491259	0.213431	0.0175232	0.251037	9.35027e-05	1.00672	9.1735e-62	0.786495	1.07459e-19	0.30887	9.65225e-12	0.00916413	0.874299	0.964765	3.79048e-64	0.790939	1.48316e-19
FBgn0026417	Hus1-like	54.25	47.54	49.98	13.81	13.51	12.33	16.47	15.69	14.91	9.55	10.62	10.55	16.86	15.75	15.57	22.01	22.83	23.17	50.59	3.39634	13.2167	0.78239	15.69	0.78	10.24	0.598582	16.06	0.698642	22.67	0.596322	-1.44499	8.38823e-23	-1.34875	2.1839e-22	0.062927	0.768684	-0.653154	0.000640404	-2.24679	9.44643e-41	0.351342	0.00468457	0.917136	2.29038e-07	0.211494	0.146263	-1.33416	7.3252e-24
FBgn0037279	CG1129	48.37	58.69	65.17	39.04	49.38	43.36	53.39	51.23	53	48.43	46.78	49.93	38.4	39.46	38.8	48.14	48.66	47.42	57.41	8.47283	43.9267	5.19324	52.54	1.15113	48.38	1.5756	38.8867	0.535288	48.0733	0.622682	0.117251	0.442455	0.224307	0.0618932	0.0731742	0.680245	-0.142533	0.251379	-0.174819	0.163074	0.157885	0.0286211	-0.243139	0.00621081	-0.437252	4.45555e-05	-0.423799	0.000371587
FBgn0037280	CG1126	9.69	2.86	8.27	0.08	0.18	0.04	0.05	0.36	0.14	0	0.08	0	0.03	0.03	0.09	0	0	0	6.94	3.60401	0.1	0.072111	0.183333	0.159478	0.0266667	0.046188	0.05	0.034641	0	0	-5.59069	4.49205e-18	-4.87247	9.48332e-15	0.705118	0.728216	-1.71036	0.513948	-7.49184	1.34642e-08	-2.16707	NA	-1.7341	NA	-3.49465	0.1873	-9.22887	2.7009e-12
FBgn0037282	CG14657	157.75	201.73	199.45	38.27	40.5	41.76	49.63	47.92	52.41	33.41	36.18	30.4	35.48	38.23	40.94	41.96	38.15	42.93	186.31	24.7599	40.1767	1.76732	49.9867	2.26615	33.33	2.89083	38.2167	2.73002	41.0133	2.5267	-1.70917	2.19595e-50	-1.5465	4.72997e-47	0.129278	0.286714	-0.547955	6.62601e-08	-2.40722	1.29572e-101	-0.0396786	0.653349	0.0623753	0.518572	-0.536074	4.78968e-10	-2.34911	8.40288e-114
FBgn0037283	CG14658	0	0.17	0.06	0	0	0	0	0	0	0	0	0	0	0	0	0.14	0	0	0.0766667	0.0862168	0	0	0	0	0	0	0	0	0.0466667	0.080829	-2.61141	NA	-2.68102	NA	NA	NA	NA	NA	-0.764576	NA	1.99601	NA	0.24698	NA	2.18831	NA	-0.522285	0.876747
FBgn0037284	CG14659	0	0	0	0	0	0	0	0	0	0	0	0	0	0	0	0	0	0.16	0	0	0	0	0	0	0	0	0	0	0.0533333	0.092376	NA	NA	NA	NA	NA	NA	NA	NA	NA	NA	1.99852	NA	0.248306	NA	2.19085	NA	2.02597	NA
FBgn0003002	opa	0.2	0.21	0.51	0.11	0.25	0.22	0.01	0.05	0.05	0	0	0	0.21	0.25	0.19	0.95	0.99	0.77	0.306667	0.176163	0.193333	0.0737111	0.0366667	0.023094	0	0	0.216667	0.0305505	0.903333	0.117189	-0.151825	0.851305	-2.61519	0.00461811	-2.50021	0.0127224	-4.92884	0.00368162	-5.23609	0.000754641	1.90174	9.6689e-06	6.63529	1.10385e-06	1.64297	0.00136681	1.37777	0.00877425
FBgn0020280	laf	0	0	0.09	0.03	0.02	0	0	0	0	0.05	0	0	0.05	0	0.03	0.13	0	0.1	0.03	0.0519615	0.0166667	0.0152753	0	0	0.0166667	0.0288675	0.0266667	0.0251661	0.0766667	0.0680686	-0.507206	0.883318	-3.43913	0.448667	-2.97261	NA	0.0817696	NA	-0.58628	NA	1.43365	0.456222	1.8443	0.514498	1.89283	0.387999	1.2269	0.606035
FBgn0004913	Gnf1	85.56	104.44	89.63	56.2	52.35	49.07	62.74	59.18	65.17	149.18	151.73	128.07	188.21	175.83	191.82	218.17	195.61	213.48	93.21	9.93609	52.54	3.5688	62.3633	3.01271	142.993	12.9867	185.287	8.38626	209.087	11.9044	-0.329583	0.0065709	-0.23252	0.0492679	0.0642512	0.604638	1.16622	1.47103e-38	0.688007	2.05861e-09	0.0304188	0.601167	0.311825	4.51747e-06	1.4268	1.84353e-87	0.996412	7.00139e-27
FBgn0265082	Cdep	12.85	13.23	19.57	19.98	19.15	16.71	28.81	26.08	27.15	6.59	6.34	5.36	3.44	4.24	3.35	0.4	0.62	0.47	15.2167	3.77488	18.6133	1.69977	27.3467	1.37558	6.09667	0.650103	3.67667	0.489932	0.496667	0.112398	0.794366	1.76889e-06	1.19923	1.94202e-14	0.372734	6.04737e-05	-1.88153	1.44299e-59	-1.24241	1.69694e-11	-3.0949	5.58871e-42	-3.91943	8.75432e-69	-5.86576	1.24081e-223	-5.15924	9.38612e-96
FBgn0004436	Ubc6	76.19	62.45	71.18	98.65	90.93	92.26	103.34	105.89	98.21	174.36	179.15	175.27	161.35	157.16	165.3	193.52	163.35	179.76	69.94	6.95342	93.9467	4.12713	102.48	3.91156	176.26	2.54384	161.27	4.07059	178.877	15.1044	0.918923	2.44784e-11	0.893261	7.03831e-12	-0.0586472	0.657085	0.627241	3.21621e-16	1.39686	1.29667e-29	0.00740409	0.928468	-0.211446	0.00255788	0.363189	3.38388e-05	1.18003	3.2339e-20
FBgn0037288	CG14661	0.42	0.9	0.4	1.23	9.04	3.05	7.54	2.78	3.74	0	0.3	0.18	0.12	0.34	0.15	0.08	0	0	0.573333	0.283078	4.44	4.08633	4.68667	2.51725	0.16	0.150997	0.203333	0.119304	0.0266667	0.046188	3.45618	6.40195e-07	3.39573	8.04954e-11	-0.103133	0.95388	-5.05847	1.02853e-06	-1.76178	0.162518	-2.86807	0.152036	-2.58627	0.38287	-7.7235	3.39237e-08	-4.37259	0.00537119
FBgn0250839	CG2016	0.09	0.17	0.34	0	0.15	0.18	0.22	0.07	0.24	0.14	0	0.32	0.05	0	0	0	0	0	0.2	0.127671	0.11	0.0964365	0.176667	0.0929157	0.153333	0.160416	0.0166667	0.0288675	0	0	-0.328168	0.849835	0.155758	0.911133	0.444527	0.865953	0.120901	0.961386	-0.415212	0.806322	-0.0568645	NA	-3.4647	0.329484	-3.34219	0.320564	-3.79831	0.0789908
FBgn0037290	CG1124	0.55	0.78	0.79	0.34	1.43	0.67	1.32	0.48	3.17	6.32	6.43	9.75	0.92	1.14	0.27	0	0.12	0	0.706667	0.135769	0.813333	0.558957	1.65667	1.37624	7.5	1.94933	0.776667	0.452364	0.04	0.069282	0.712557	0.342945	1.58823	0.029491	0.835498	0.439721	2.90527	1.37023e-09	3.46904	3.79571e-22	-4.9251	0.00150403	-8.26472	7.26124e-11	-5.39744	0.000453598	-4.79538	0.00101922
FBgn0037291	CG14662	0.26	0	0.17	0.1	0.07	0.12	0.24	0	0.12	0.06	0.15	0	0	0	0	0	0	0	0.143333	0.132035	0.0966667	0.0251661	0.12	0.12	0.07	0.0754983	0	0	0	0	-0.241679	0.876863	0.0211101	0.991314	0.22563	0.926864	-0.586635	0.749831	-0.996239	0.594728	NA	NA	-3.38095	0.348969	-4.1051	0.0618478	-4.4409	0.0861362
FBgn0037292	plh	0.04	0	0.16	0.18	0.26	0.09	0	0.19	0.23	0.13	0.23	0	0	0.1	0	0	0	0	0.0666667	0.0832666	0.176667	0.085049	0.14	0.122882	0.12	0.115326	0.0333333	0.057735	0	0	1.80648	0.309896	1.3799	0.537522	-0.476155	0.850129	-0.698093	0.732289	0.936333	NA	-0.942861	NA	-2.9612	0.460596	-3.79251	0.11449	-2.06706	0.618503
FBgn0010313	corto	15.49	19.24	19.38	42.15	39.43	41.78	38.17	41.32	39.79	107.59	130.49	112.43	143.48	139.95	140.98	143.81	133.17	150.06	18.0367	2.20659	41.12	1.47523	39.76	1.57521	116.837	12.0692	141.47	1.8153	142.347	8.53956	1.69249	2.4113e-49	1.4923	3.4265e-42	-0.232877	0.0240328	1.22444	7.17441e-41	2.7671	1.6528e-138	-0.134439	0.00694639	0.0507142	0.530179	1.22416	6.97579e-59	2.8131	4.66899e-188
FBgn0262605	CG43131	0	0	0.26	0	0	0	0	0	0.06	0	0	0	0	0	0	0	0	0	0.0866667	0.150111	0	0	0.02	0.034641	0	0	0	0	0	0	-2.3003	NA	-1.40898	NA	0.861696	NA	NA	NA	-0.475058	NA	NA	NA	NA	NA	NA	NA	-1.19237	NA
FBgn0037293	CG12007	29.54	28.82	31.45	20.52	22.93	20.37	22.86	23.17	21.67	30.41	29.17	31.36	19.62	20.4	20.82	23.71	25.25	27.61	29.9367	1.35913	21.2733	1.43667	22.5667	0.791854	30.3133	1.0982	20.28	0.608933	25.5233	1.96431	0.00304912	0.983126	-0.0622463	0.609152	-0.0990772	0.492044	0.228344	0.0451081	0.0824549	0.484356	0.188213	0.0579627	-0.479211	1.89417e-05	-0.30237	0.00646502	-0.40141	0.000357384
FBgn0040684	CG12589	0.32	0.55	0.25	0	0	0	0	0.02	0.01	0	0	0	0	0	0	0	0	0	0.373333	0.15695	0	0	0.01	0.01	0	0	0	0	0	0	-5.61037	0.00419844	-4.5901	0.00256367	0.901518	NA	NA	NA	-3.76064	0.049735	NA	NA	NA	NA	NA	NA	-4.51914	0.0130816
FBgn0037295	dpr16	0.96	1.04	1.52	0.02	0	0.02	0.86	0.62	0.59	0.06	0	0	0	0.02	0	0	0	0	1.17333	0.302875	0.0133333	0.011547	0.69	0.147986	0.02	0.034641	0.00666667	0.011547	0	0	-6.01172	2.5362e-11	-0.419661	0.329081	5.56485	4.58037e-09	0.306609	NA	-5.81474	1.14899e-05	-0.0973026	NA	-1.8471	NA	-1.59532	NA	-7.66844	4.18121e-09
FBgn0037294	CG12590	1.27	1.3	0.68	0.07	0.04	0	1.7	1.29	1.82	0	0	0	0	0	0	0	0	0	1.08333	0.349619	0.0366667	0.0351188	1.60333	0.277909	0	0	0	0	0	0	-4.49627	7.2483e-06	0.906645	0.0505667	5.37679	1.96355e-10	-1.25046	NA	-5.84078	4.527e-05	NA	NA	NA	NA	-2.08037	NA	-6.61535	2.32815e-06
FBgn0259212	cno	29.86	36.66	41.26	43.86	40.92	41.22	59.43	57.32	64.44	95.31	101.05	94.37	65.29	69.73	70.95	83.2	79.1	83.91	35.9267	5.73527	42	1.61778	60.3967	3.65711	96.91	3.61602	68.6567	2.97875	82.07	2.59648	0.730253	8.56752e-10	1.10272	1.6444e-20	0.339742	9.56391e-05	0.925481	4.33433e-43	1.50518	1.81486e-43	0.112907	0.0223052	-0.474581	9.70554e-35	0.399581	3.30202e-10	1.02522	4.35064e-20
FBgn0037296	Prosbeta2R2	9.95	8.04	8.78	0.26	0.27	0.33	0.63	0.72	0.57	0.09	0.23	0.27	0.12	0.1	0.26	0.12	0.2	0	8.92333	0.963033	0.286667	0.0378594	0.64	0.0754983	0.196667	0.0945163	0.16	0.087178	0.106667	0.100664	-4.45707	1.01042e-39	-3.46259	9.40909e-36	0.961687	0.169444	-0.888301	0.478065	-5.51078	4.35985e-17	-0.866561	0.593926	-1.18093	0.530099	-2.16447	0.102633	-6.8886	5.60946e-19
FBgn0037297	CG1116	41.38	40.66	41.03	24.95	23.51	22.35	28.09	26.75	27.02	27.5	29.35	24.96	45.47	45.15	43.96	52.67	54.6	50.92	41.0233	0.360046	23.6033	1.30251	27.2867	0.708684	27.27	2.20402	44.86	0.795676	52.73	1.84073	-0.303256	0.013841	-0.243998	0.0281239	0.0264212	0.872866	-0.0654104	0.633508	-0.517662	1.918e-05	0.0834964	0.289712	0.707736	2.86335e-12	0.591891	3.31674e-10	0.187214	0.0539601
FBgn0037298	CG2604	82.96	76.5	83.1	107.11	100.57	93.3	108.93	107.06	93.08	80.67	85.23	79.28	112.91	110.3	113.53	114.79	132.93	121.02	80.8533	3.77075	100.327	6.90821	103.023	8.66179	81.7267	3.11256	112.247	1.71413	122.913	9.21702	0.80523	1.19779e-12	0.6929	2.11053e-09	-0.144832	0.250954	-0.573904	2.53964e-12	0.0816506	0.455163	-0.0173625	0.834582	0.351494	3.40326e-05	-0.274163	0.00339236	0.430322	8.41648e-05
FBgn0040682	CG14664	3.31	3.72	4.5	0.16	0.07	0.02	0.61	0.18	1	0	0	0	0	0.03	0.03	0	0	0.11	3.84333	0.604511	0.0833333	0.070946	0.596667	0.410163	0	0	0.02	0.0173205	0.0366667	0.0635085	-5.35582	5.02841e-15	-2.36282	7.48498e-05	2.81546	0.0454619	-1.7047	NA	-6.90833	8.37494e-08	0.958986	NA	0.335359	NA	-1.40235	0.609113	-6.57891	2.60445e-07
FBgn0037299	Vps37B	134.52	132.19	123.16	37.01	37.73	33.57	48.7	46.27	44.68	39.72	41.9	39.03	54.6	50.1	51.22	57.26	56.07	54.48	129.957	6.00027	36.1033	2.22327	46.55	2.02457	40.2167	1.49808	51.9733	2.34268	55.9367	1.39479	-1.35538	1.73405e-28	-1.13883	5.17054e-23	0.18306	0.105274	-0.121428	0.333364	-1.62518	9.4575e-43	-0.0415797	0.665747	0.2368	0.0315426	0.0639351	0.543805	-1.39104	2.83639e-42
FBgn0040208	Kat60	68.08	75.37	75.66	38.4	40.44	36.51	39.47	44.74	41.93	79.67	84.69	79.86	89.53	83.81	88.65	90.97	84.74	89.91	73.0367	4.29505	38.45	1.96548	42.0467	2.63694	81.4067	2.84504	87.33	3.08	88.54	3.3333	-0.427729	2.45432e-06	-0.447756	1.56006e-05	-0.0534286	0.722918	0.803127	1.4433e-29	0.226408	0.00357889	-0.123385	0.0155713	-0.113261	0.0477812	0.638343	1.9246e-23	0.108711	0.120919
FBgn0037301	Mms19	34.19	37.2	35.06	30.34	37.03	32.25	35.38	30.41	33.81	32.17	33.21	32.63	33.38	34.17	35.18	49.77	52.29	50.36	35.4833	1.54901	33.2067	3.44608	33.2	2.54053	32.67	0.521153	34.2433	0.902238	50.8067	1.31804	0.400618	0.000948844	0.249318	0.0232274	-0.185304	0.17388	-0.303559	0.00250913	-0.0509991	0.592322	0.421262	4.57624e-14	0.400904	9.5031e-09	0.0468954	0.631789	0.34612	8.51166e-06
FBgn0087005	rtp	1.27	1.44	1.52	0.1	0.05	0.08	0	0.06	0.11	0	0.22	0	0.13	0	0.08	0	0	0.07	1.41	0.127671	0.0766667	0.0251661	0.0566667	0.0550757	0.0733333	0.127017	0.07	0.0655744	0.0233333	0.0404145	-3.72077	5.41931e-06	-4.24359	2.27792e-06	-0.617046	0.846289	-0.234689	NA	-3.96682	0.00167699	-1.20625	NA	-1.42964	0.752607	-1.75752	0.510286	-5.54997	4.34346e-05
FBgn0260462	CG12163	129.09	154.63	148.76	137.55	125.27	116.56	153.12	157.04	159.19	174.47	173.89	164.28	219.59	206.97	214.48	216.09	224.48	217.18	144.16	13.377	126.46	10.5455	156.45	3.07771	170.88	5.72312	213.68	6.34792	219.25	4.56198	0.310148	0.00505924	0.467545	6.40445e-07	0.124755	0.240702	0.155804	0.0729761	0.31696	0.000299663	-0.109271	0.0232452	0.122722	0.0320101	0.22798	0.00465713	0.436301	4.34265e-08
FBgn0053293	CG33293	1.38	1.06	1.43	0.51	0.73	0.45	0.65	0.94	0.73	0.56	0.48	0.28	0.33	0.47	0.18	0	0.47	0	1.29	0.200749	0.563333	0.147422	0.773333	0.149778	0.44	0.144222	0.326667	0.145029	0.156667	0.271355	-0.707307	0.333045	-0.398322	0.550553	0.274218	0.81569	-0.585067	0.644375	-1.4351	0.115228	-1.61061	0.403634	-2.0552	0.344027	-2.8326	0.0885897	-3.82003	0.0045694
FBgn0037304	CG1113	2.63	3.5	3.36	0.29	0.23	0.16	0.54	0.65	0.71	0.51	0.6	0.29	0.49	0.58	0.93	0.3	0.15	0.38	3.16333	0.467155	0.226667	0.0650641	0.633333	0.0862168	0.466667	0.159478	0.666667	0.232451	0.276667	0.116762	-3.31376	7.12158e-18	-1.95963	6.19431e-11	1.3126	0.0297532	0.798356	0.358421	-2.62102	2.92657e-09	-1.3489	0.0461821	-0.976259	0.304283	-0.236342	0.794937	-3.58293	8.55036e-16
FBgn0037305	CG12173	128.07	112.43	116.61	96.71	93.02	86.02	84.2	81.63	76.34	56.73	57.46	48.93	72.55	77.56	72.85	72.12	70.42	72.14	119.037	8.09746	91.9167	5.42974	80.7233	4.00767	54.3733	4.72817	74.32	2.80993	71.56	0.98732	0.118295	0.412989	-0.219258	0.102793	-0.370596	5.2618e-05	-1.02941	7.40186e-22	-1.06213	1.53042e-14	-0.199666	0.0136923	0.153947	0.179142	-0.926829	1.58677e-27	-0.908984	2.48873e-15
FBgn0264785	Hph	59.43	66.63	72.44	42.77	34.64	41.92	41.87	41.98	44.13	98.74	106.33	106.88	130.15	122.77	128.47	142.58	132.17	141.37	66.1667	6.51736	39.7767	4.46874	42.66	1.27424	103.983	4.54918	127.13	3.86818	138.707	5.69316	-0.230413	0.113994	-0.282973	0.00426459	-0.0849019	0.653206	1.10271	6.32453e-24	0.722099	1.85515e-16	-0.0176135	0.744877	0.18357	0.00092518	1.23306	6.56345e-31	0.899304	5.66553e-27
FBgn0037307	Tim17a2	2.03	1.23	2.56	0.23	0.3	0.21	0.41	0.37	0.36	0	0.21	0.18	0.13	0.09	0.12	0	0	0.13	1.94	0.669552	0.246667	0.0472582	0.38	0.0264575	0.13	0.113578	0.113333	0.0208167	0.0433333	0.0750555	-2.4783	5.89358e-05	-2.00148	0.000271689	0.446276	0.717277	-1.23624	0.472589	-3.87149	0.000285445	-1.20009	0.602409	-1.54479	0.612853	-2.76815	0.124788	-5.28656	1.12014e-05
FBgn0013576	mtd	60.41	90.67	89.31	63.98	71.96	73.53	78.49	74.11	86.9	220.15	216.36	202.95	173.77	174.12	186.79	181.7	177.72	174.44	80.13	17.0916	69.8233	5.121	79.8333	6.49996	213.153	9.03726	178.227	7.41813	177.953	3.63562	0.30993	0.0585199	0.350324	0.0284365	0.00697076	0.973745	1.32879	2.26399e-54	1.48882	2.85453e-26	-0.147158	0.00082354	-0.496093	5.89124e-26	0.782313	2.39411e-23	0.987793	4.7912e-12
FBgn0051538	CG31538	0.71	0.83	1.16	1.43	0.9	0.73	0.91	0.94	0.72	0.58	0.5	0.48	0.11	0.32	0.24	0	0	0	0.9	0.233024	1.02	0.365103	0.856667	0.119304	0.52	0.052915	0.223333	0.105987	0	0	0.669368	0.137568	0.275101	0.506757	-0.421993	0.429679	-1.23895	0.0298007	-0.719101	0.173729	-5.10906	0.00209315	-6.40518	2.42898e-05	-7.70148	7.09496e-09	-7.13314	7.97895e-08
FBgn0037310	Tim17b1	2.5	1.7	1.76	0.25	0.24	0.3	0.16	0.37	0.4	0.15	0.93	0.47	0.27	0.17	0.15	0	0	0	1.98667	0.445571	0.263333	0.0321455	0.31	0.130767	0.516667	0.392088	0.196667	0.064291	0	0	-2.41704	0.00020804	-2.31969	0.000321269	0.0550711	0.975785	0.69593	0.603373	-1.84592	0.0206871	-3.32268	0.155945	-4.81134	0.0267347	-4.18135	0.0504903	-6.69566	9.84842e-07
FBgn0037312	CG11999	51.81	46.32	44.89	34.08	41.17	34.85	45.03	46.34	40.7	63.59	59.22	63	90.71	81.76	84.16	102.96	119.37	121.03	47.6733	3.65311	36.7	3.89023	44.0233	2.95168	61.9367	2.37112	85.5433	4.63258	114.453	9.98806	0.113108	0.515311	0.22577	0.147324	0.0781177	0.692219	0.473871	0.000138462	0.439897	0.00222151	0.272944	0.00240909	0.651864	1.92101e-09	1.07389	6.72353e-21	1.08785	3.67265e-16
FBgn0037313	CG1161	77.12	59.11	58.1	67.42	68.84	64.62	75.39	77.82	78.13	76.42	82.25	81.46	101.03	93.1	90.03	91.46	100.81	92.52	64.7767	10.7016	66.96	2.14728	77.1133	1.50048	80.0433	3.16266	94.72	5.67612	94.93	5.11974	0.534154	0.00265684	0.588434	0.000673317	0.0202755	0.888367	-0.0237057	0.821559	0.363123	0.037513	-0.147131	0.0938501	0.00830079	0.940701	-0.0670896	0.474036	0.372121	0.0299504
FBgn0250746	Prosbeta7	325.06	280.28	280.05	250.04	280.29	226.42	279.46	299.78	253.07	253.81	263.7	236.34	455.53	419.57	423.52	441.15	463.41	457.87	295.13	25.9204	252.25	27.0029	277.437	23.4206	251.283	13.8539	432.873	19.7204	454.143	11.5885	0.261772	0.0779341	0.251223	0.0873487	-0.0441799	0.812007	-0.282288	0.00171696	-0.169177	0.20084	-0.0766511	0.184151	0.616237	7.37774e-27	0.283901	0.000450711	0.446407	0.000121936
FBgn0037315	Cerk	20.94	22.33	23.75	28.74	26.14	26.92	35.19	35.39	32.95	53.13	55.56	58.19	72.52	74.85	73.09	90.59	94.64	90.04	22.34	1.40503	27.2667	1.33422	34.51	1.3547	55.6267	2.53066	73.4867	1.21459	91.7567	2.51214	0.786693	3.98163e-13	0.975034	1.35203e-25	0.156013	0.163129	0.746204	1.80939e-17	1.38312	1.10171e-55	0.173015	0.00142951	0.489162	3.50088e-13	1.18351	9.08818e-50	1.86695	5.623e-125
FBgn0085306	CG34277	6.48	6.51	6.74	0.02	0.12	0.07	0.42	0.09	0.21	0	0	0	0.02	0.04	0.02	0.09	0	0	6.57667	0.142244	0.07	0.05	0.24	0.167033	0	0	0.0266667	0.011547	0.03	0.0519615	-6.1411	3.91419e-33	-4.53797	2.46384e-27	1.64733	0.257699	-2.33582	NA	-8.61328	3.28626e-12	0.199146	0.947728	0.980624	NA	-1.38955	0.561465	-7.61889	3.2517e-13
FBgn0051542	CG31542	6.05	2.38	3.21	0.14	0.29	0.15	0.62	0.22	0.24	0.14	0.25	0.44	0.03	0.12	0.03	0.05	0	0.16	3.88	1.92455	0.193333	0.083865	0.36	0.225389	0.276667	0.151767	0.06	0.0519615	0.07	0.0818535	-3.84379	2.08301e-10	-3.18479	2.59249e-08	0.659917	0.634311	0.188366	0.906913	-3.84513	7.95475e-06	0.197581	0.936949	-2.24659	0.24791	-2.09327	0.205413	-6.06123	1.90134e-09
FBgn0003275	RpII18	466.24	314.5	312.16	158.86	220.13	194.1	176.06	153.58	183.37	106.21	125.86	104.84	126.49	133.23	121.03	113.16	124.11	113.9	364.3	88.2904	191.03	30.7502	171.003	15.5254	112.303	11.7604	126.917	6.11118	117.057	6.11956	-0.449144	0.050168	-0.758914	0.000244499	-0.345684	0.0367423	-1.04442	7.70625e-14	-1.64231	1.01358e-15	-0.269689	0.00311704	-0.183758	0.136475	-1.2757	2.77774e-22	-1.82041	5.08122e-20
FBgn0086695	hd	30.24	30.2	27.25	16.95	16.38	13.51	15.35	12.65	13.59	47.43	52.7	50.15	83.4	77.02	81.71	112.61	110.12	109.97	29.23	1.71485	15.6133	1.8437	13.8633	1.3706	50.0933	2.63546	80.71	3.30547	110.9	1.4828	-0.413878	0.00664513	-0.734947	1.59157e-07	-0.354081	0.0159657	1.40421	1.15412e-37	0.842318	6.85295e-13	0.312886	1.15886e-09	0.911524	2.60807e-44	2.26469	5.56799e-131	1.75122	8.55438e-76
FBgn0037317	CG14667	46.95	55.57	44.56	16.23	17.17	15.41	17.68	15.85	17.48	29.7	28.24	31.45	43.39	39.56	41.72	48.28	48.42	50.46	49.0267	5.79132	16.27	0.880682	17.0033	1.00381	29.7967	1.60718	41.5567	1.92022	49.0533	1.22022	-1.09571	3.59789e-14	-1.18273	7.16683e-17	-0.120859	0.462869	0.58905	5.22459e-06	-0.653237	4.43108e-06	0.0947234	0.269704	0.490703	6.90671e-06	1.02623	1.95674e-25	-0.168714	0.177967
FBgn0041707	7B2	1.83	1.79	1.16	0.37	0.14	0.14	0.44	0.22	0.36	0.1	0	0	0	0	0.03	0	0	0	1.59333	0.37581	0.216667	0.132791	0.34	0.111355	0.0333333	0.057735	0.01	0.0173205	0	0	-2.44147	0.000277739	-1.89328	0.000790573	0.508888	0.712655	-2.67732	0.201785	-5.24138	0.000129664	0.0150552	NA	-1.73474	NA	-4.46657	0.0308045	-6.97763	2.23033e-07
FBgn0001311	kkv	1.92	2.79	2.27	0.65	1.09	0.55	3.06	2.18	1.86	0.38	0.32	0.46	0.1	0.09	0.06	0.05	0.05	0.05	2.32667	0.437759	0.763333	0.287286	2.36667	0.621396	0.386667	0.0702377	0.0833333	0.0208167	0.05	0	-1.10952	0.000222951	0.372212	0.142516	1.4486	3.56091e-06	-1.27978	0.00366041	-2.55006	1.71005e-16	-0.804375	0.39601	-3.10718	1.51101e-05	-4.42699	1.86585e-13	-5.63505	3.08313e-29
FBgn0037320	CG14668	0	0	0.04	0.03	0.05	0	0	0	0	0	0	0	0	0	0	0	0	0	0.0133333	0.023094	0.0266667	0.0251661	0	0	0	0	0	0	0	0	1.30102	NA	-1.14465	NA	-2.4793	NA	-0.385469	NA	0.766736	NA	NA	NA	NA	NA	-1.20044	NA	0.00113165	NA
FBgn0264712	CG1172	52.48	63.48	68.86	24.45	28.03	31.23	30.26	32.4	33.94	95.61	102.21	96.43	87.39	83.44	87.78	115.01	102.26	116.78	61.6067	8.34914	27.9033	3.39177	32.2	1.84813	98.0833	3.59724	86.2033	2.40105	111.35	7.92176	-0.636024	1.90897e-05	-0.583027	1.15323e-06	0.0190963	0.940214	1.5294	1.55546e-41	0.743658	5.8773e-13	0.227547	9.52507e-05	-0.0499179	0.486969	1.42717	4.11162e-36	0.687	3.66127e-10
FBgn0037322	Or83a	0	0	0	0	0	0	0	0	0	0	0	0	0	0	0	0	0	0	0	0	0	0	0	0	0	0	0	0	0	0	NA	NA	NA	NA	NA	NA	NA	NA	NA	NA	NA	NA	NA	NA	NA	NA	NA	NA
FBgn0037323	CG2663	2.31	1.16	2.57	0	0	0	0.05	0.09	0.04	0	0	0	0	0	0	0	0	0	2.01333	0.750355	0	0	0.06	0.0264575	0	0	0	0	0	0	-8.77237	7.82956e-11	-4.78363	1.42877e-10	3.96199	NA	NA	NA	-6.93058	2.76333e-07	NA	NA	NA	NA	NA	NA	-7.71345	7.71589e-09
FBgn0037324	Orco	0	0	0.06	0	0	0	0	0	0	0	0	0	0	0	0	0	0	0	0.02	0.034641	0	0	0	0	0	0	0	0	0	0	-2.44422	NA	-2.51471	NA	NA	NA	NA	NA	-0.619071	NA	NA	NA	NA	NA	NA	NA	-1.42221	NA
FBgn0037326	CG14669	0.6	0.73	0.69	0.05	0.16	0.07	1.63	1.34	2.01	0.21	0.11	0.7	0	0.02	0.02	0	0	0	0.673333	0.0665833	0.0933333	0.0585947	1.66	0.336006	0.34	0.315753	0.0133333	0.011547	0	0	-2.32132	3.20631e-05	1.65861	2.2389e-09	3.92483	2.71962e-22	1.53027	0.0978013	-0.983787	0.136571	-1.77206	NA	-6.43175	8.48045e-05	-4.92109	0.00722966	-7.3646	1.32597e-08
FBgn0037325	CG12147	0.1	0	0.08	0	0	0	0	0.01	0	0	0	0	0	0	0	0	0	0	0.06	0.052915	0	0	0.00333333	0.0057735	0	0	0	0	0	0	-4.07524	0.252291	-3.18169	0.27529	0.861696	NA	NA	NA	-2.23382	NA	NA	NA	NA	NA	NA	NA	-3.02071	0.371863
FBgn0037327	PEK	61.9	68.79	78.33	34.72	40.78	36.29	35.26	33.86	31.61	88.48	92.66	90.28	48.8	52.99	55.56	76.98	76.34	78.25	69.6733	8.25054	37.2633	3.14506	33.5767	1.84142	90.4733	2.0967	52.45	3.4122	77.19	0.972163	-0.401772	0.000380562	-0.703292	2.03918e-12	-0.334708	0.00120856	0.999588	3.9704e-39	0.448094	1.26236e-06	0.412622	2.1087e-13	-0.463824	1.81298e-27	0.484749	2.86716e-11	-0.0206177	0.833093
FBgn0037328	RpL35A	4086.21	2743.09	3077.69	3602.63	3114.37	2936.93	3158.59	3185.36	2855.85	1569.74	1526.39	1708.92	1215.13	1449.03	1273.88	1816.25	2184.5	1814.85	3302.33	699.171	3217.98	344.732	3066.6	183.005	1601.68	95.3655	1312.68	121.681	1938.53	213.015	0.447189	0.0231002	0.228157	0.247958	-0.252017	0.0251253	-1.28656	6.06006e-48	-0.986993	3.00572e-08	0.417374	1.45009e-05	0.0418197	0.686323	-1.29617	2.20214e-33	-0.947235	4.16243e-07
FBgn0037329	POLDIP2	50.78	41.5	50.69	42.1	42.03	28.99	41.94	39.74	32.25	29.25	31.38	33.16	45.65	44.4	43.66	56.13	58.46	61.56	47.6567	5.33202	37.7067	7.54894	37.9767	5.07996	31.2633	1.95761	44.57	1.00583	58.7167	2.72408	0.150488	0.443852	0.0140331	0.940895	-0.168672	0.478339	-0.546879	0.000367339	-0.545935	0.000190547	0.252934	0.000367228	0.678949	1.58263e-12	0.0771607	0.614632	0.126315	0.366787
FBgn0037330	mRpL44	69.55	63.73	57.68	93.47	108.38	80.86	81.38	80.67	65.79	57.32	58.5	54.9	57.39	58.31	58.11	70.3	71.99	66.06	63.6533	5.93537	94.2367	13.776	75.9467	8.80309	56.9067	1.83525	57.9367	0.483873	69.45	3.05501	1.05287	2.03546e-11	0.593771	0.000149712	-0.492533	0.00065443	-1.00392	1.74565e-18	-0.0989069	0.506029	0.11087	0.169515	0.0477648	0.653076	-1.00556	2.4841e-19	-0.0507803	0.712638
FBgn0011715	Snr1	108.94	97.93	98.44	59.26	53.63	50.18	56.59	54.63	55.01	94.15	98.68	97.2	168.45	151.99	164.52	201.49	222.03	204.73	101.77	6.21464	54.3567	4.58341	55.41	1.03942	96.6767	2.3099	161.653	8.59629	209.417	11.0429	-0.413514	0.0026889	-0.535539	9.6805e-06	-0.154736	0.165578	0.551383	2.00574e-09	-0.010816	0.932976	0.226645	0.000597005	0.879771	2.8244e-34	1.37985	5.60052e-53	0.866378	3.45338e-15
FBgn0266539	CG45100	38.44	37.91	36.06	23.25	27.26	19.66	27.82	25.52	22.2	22.24	21.33	21.05	27.1	25.22	27.23	36.27	34.1	36.8	37.47	1.24952	23.39	3.80193	25.18	2.82538	21.54	0.622174	26.5167	1.12483	35.7233	1.43061	-0.189462	0.249121	-0.231951	0.107608	-0.0757134	0.756902	-0.395787	0.00769381	-0.732964	5.55473e-09	0.288438	0.000299314	0.4971	2.8465e-06	0.0484743	0.726301	-0.239948	0.0213228
FBgn0025825	HDAC3	38.44	37.91	36.06	23.25	27.26	19.66	27.82	25.52	22.2	22.24	21.33	21.05	27.1	25.22	27.23	36.27	34.1	36.8	37.47	1.24952	23.39	3.80193	25.18	2.82538	21.54	0.622174	26.5167	1.12483	35.7233	1.43061	-0.189462	0.249121	-0.231951	0.107608	-0.0757134	0.756902	-0.395787	0.00769381	-0.732964	5.55473e-09	0.288438	0.000299314	0.4971	2.8465e-06	0.0484743	0.726301	-0.239948	0.0213228
FBgn0037332	Hcs	13.14	18.82	19.43	20.02	21.29	19.58	24.22	25.58	24.51	30.64	34.45	29.82	33.45	33.38	35.6	43.08	39.95	42.08	17.13	3.46888	20.2967	0.887938	24.77	0.71631	31.6367	2.47067	34.1433	1.262	41.7033	1.59863	0.751107	2.85681e-07	0.887764	8.50133e-10	0.103663	0.345527	0.363196	5.12474e-05	0.962538	5.9204e-11	0.145425	0.00969634	0.160946	0.0328107	0.473719	3.78526e-12	1.11992	3.40971e-15
FBgn0015402	ksr	19.63	20.56	20.22	25.14	23.41	22.51	28.42	27.63	24.94	39.29	44.69	41.81	25.86	26.85	26.48	37.36	39.91	37.86	20.1367	0.470567	23.6867	1.33665	26.9967	1.8244	41.93	2.702	26.3967	0.500233	38.3767	1.35123	0.73033	3.52048e-12	0.767699	3.87487e-14	0.00489798	0.978654	0.54356	2.45564e-10	1.12494	6.88408e-36	0.390992	2.1722e-10	-0.364671	1.19177e-06	0.128099	0.145085	0.756847	2.63161e-21
FBgn0051550	CG31550	89.93	82.04	85.32	40.5	38.45	34.03	39.55	42.03	39.9	36.46	41.09	35.2	42.22	41.95	40.17	39.94	44.45	45.97	85.7633	3.96364	37.66	3.30655	40.4933	1.34225	37.5833	3.10152	41.4467	1.11384	43.4533	3.13612	-0.69536	1.39221e-08	-0.739208	4.50108e-11	-0.0769091	0.570003	-0.27908	0.0064115	-1.124	1.12078e-22	-0.0779813	0.346074	-0.0283917	0.793897	-0.359245	0.000247807	-1.15501	5.53347e-27
FBgn0051547	NKCC	1.13	0.71	1.11	4.21	3.06	2.55	6.63	5.22	6.42	0.61	0.56	0.57	0.75	0.81	0.52	0	0	0.02	0.983333	0.236925	3.27333	0.850314	6.09	0.760723	0.58	0.0264575	0.693333	0.15308	0.00666667	0.011547	2.21929	1.46095e-14	2.9662	3.52788e-40	0.717296	0.00105644	-2.77117	1.02991e-16	-0.701591	0.0982621	-6.49679	8.80599e-07	-6.32143	4.66921e-06	-9.14765	1.26964e-13	-7.02822	4.87461e-08
FBgn0010399	Nmdar1	1.35	1.74	1.96	0.03	0.04	0.06	0.11	0.12	0.12	0.11	0.14	0.08	0	0.05	0.02	0	0	0.01	1.68333	0.308923	0.0433333	0.0152753	0.116667	0.0057735	0.11	0.03	0.0233333	0.0251661	0.00333333	0.0057735	-4.82385	8.10836e-27	-3.54538	3.05664e-26	1.24573	0.208456	1.12341	0.339796	-3.82341	2.18606e-13	-1.77904	0.545348	-4.18404	0.0231771	-3.11785	0.128869	-8.05413	9.15945e-11
FBgn0010051	Itp-r83A	6.2	9.76	11.14	23.74	22.86	23.43	24.35	23.47	24.38	25.47	25.49	24.88	16.12	18.03	17.88	18.39	16.35	16.89	9.03333	2.54891	23.3433	0.446356	24.0667	0.516946	25.28	0.346554	17.3433	1.06209	17.21	1.05698	1.88214	1.50301e-26	1.77339	3.49314e-24	-0.140782	0.103528	-0.165892	0.0276016	1.5648	6.58557e-19	-0.155529	0.0361676	-0.789065	7.64389e-40	-1.00659	7.51381e-42	0.768416	5.47988e-05
FBgn0264427	CG43845	0.33	0.19	0.1	0.36	0.68	0.42	0.94	0.77	0.44	0	0	0.45	0.1	0.17	0.15	0	0	0.08	0.206667	0.115902	0.486667	0.170098	0.716667	0.254231	0.15	0.259808	0.14	0.0360555	0.0266667	0.046188	1.69853	0.11094	2.10287	0.0248826	0.361466	0.752496	-2.2616	0.19063	-0.646896	0.75416	-1.94729	0.41307	-2.03732	0.597677	-4.13398	0.0148225	-2.53382	0.228796
FBgn0037336	CG2519	29.55	52.31	57.32	41.79	40.67	46.5	52.71	51.19	60.53	59.55	62.65	59.64	58.81	61.57	61.86	73.47	66.48	71.52	46.3933	14.8003	42.9867	3.09374	54.81	5.01163	60.6133	1.76438	60.7467	1.68346	70.49	3.60703	0.406287	0.0613349	0.60237	0.00426106	0.163497	0.276034	0.212502	0.0271606	0.467442	0.0212816	0.0706822	0.193755	-0.0164222	0.772893	0.144465	0.129121	0.443353	0.0372433
FBgn0014342	mia	19.86	18.77	19.27	8.78	8.57	7.75	10.15	7.2	8.97	9.15	7.49	10.83	0.95	0.89	0.72	1.14	0.65	1.24	19.3	0.545619	8.36667	0.544273	8.77333	1.4848	9.15667	1.67001	0.853333	0.119304	1.01	0.315753	-0.713171	3.5218e-07	-0.795959	1.68718e-06	-0.116007	0.647809	-0.16185	0.435679	-1.02438	6.50695e-09	0.137514	0.782243	-3.35359	1.16957e-28	-3.54711	8.5611e-45	-4.35265	7.92672e-82
FBgn0086768	Pcmt	165.91	131.14	151.63	74.53	67.42	68.34	79.44	74.13	82.26	43.05	42.46	41.89	63.55	65.67	56.94	56.86	68.59	58.87	149.56	17.4772	70.0967	3.86684	78.61	4.12806	42.4667	0.580029	62.0533	4.55338	61.44	6.27311	-0.601631	7.20264e-05	-0.587113	5.00635e-05	-0.0184148	0.916072	-1.00259	4.33864e-20	-1.75362	8.01431e-33	-0.167462	0.15783	0.292228	0.0270479	-0.763035	3.11082e-11	-1.46259	3.66826e-22
FBgn0037338	Snm1	42.05	50.75	45.2	20.96	21.08	19.72	21.62	21.7	22.8	51.19	51.96	49.92	69.09	63.83	70.36	79.49	72.31	80.01	46	4.40483	20.5867	0.75295	22.04	0.659394	51.0233	1.03016	67.76	3.46221	77.27	4.30335	-0.661508	3.49449e-09	-0.712651	1.06351e-10	-0.0843309	0.48352	1.03069	1.91294e-38	0.2205	0.0289295	0.0471624	0.475127	0.365101	7.31541e-09	1.34369	4.58413e-79	0.580397	1.75964e-10
FBgn0037339	Pi4KIIalpha	51.06	64.07	73.47	29.48	27	30.35	36.06	34.62	36.85	65.87	68.22	63.8	63.98	63.42	66.47	85.99	85.66	88.01	62.8667	11.2534	28.9433	1.73828	35.8433	1.13068	65.9633	2.21148	64.6233	1.62359	86.5533	1.27226	-0.611556	1.55877e-05	-0.456625	0.000386658	0.122629	0.357457	0.906853	1.32742e-22	0.144274	0.268941	0.276443	1.04542e-10	0.15536	0.00425372	1.01229	1.40839e-32	0.295541	0.0214215
FBgn0037340	CG14671	75.49	66.46	57.49	35.11	42.06	31.28	37.25	34.21	33.45	32.43	29.75	34.81	35.94	34.24	36.72	48.27	46.82	50.62	66.48	9.00002	36.15	5.46473	34.97	2.01077	32.33	2.53148	35.6333	1.26812	48.57	1.91768	-0.393401	0.0487646	-0.589534	0.000801938	-0.231133	0.19966	-0.445139	0.0119652	-0.984247	1.68695e-07	0.305236	0.00525027	0.362884	0.0212927	-0.136473	0.382909	-0.627698	0.000147524
FBgn0037341	CG12746	31.95	30.01	32.11	29.68	28.61	25.39	25.08	26.12	24	33.43	37.95	31.32	51.01	50.04	50.6	58.96	66.04	61.92	31.3567	1.16899	27.8933	2.23299	25.0667	1.06006	34.2333	3.38722	50.55	0.486929	62.3067	3.5558	0.324255	0.0139462	0.0213508	0.8808	-0.335839	0.00282369	0.022001	0.880222	0.196527	0.145617	0.151019	0.0498649	0.621282	7.91809e-09	0.592167	5.59718e-09	0.815024	2.61497e-14
FBgn0037342	CG2931	48.39	48.56	43.49	32.75	41.64	26.36	36.19	34.02	30.38	38.51	43.36	52.04	78.23	66.9	73.53	92.5	90.42	85.3	46.8133	2.87935	33.5833	7.67401	33.53	2.93583	44.6367	6.85475	72.8867	5.69233	89.4067	3.70542	0.00852195	0.969595	-0.139813	0.35775	-0.182265	0.446998	0.13004	0.51656	-0.0103008	0.952084	0.147847	0.0888302	0.775882	1.55673e-10	0.850869	1.70818e-08	0.759927	4.38943e-12
FBgn0041191	Rheb	97.95	103.04	102.18	93.02	89.29	89.41	101.96	102.74	100.23	120.03	118.79	103.16	136.64	130.77	133.62	125.91	106.2	125.3	101.057	2.7246	90.5733	2.11972	101.643	1.28461	113.993	9.40241	133.677	2.93541	119.137	11.2076	0.339332	0.000763021	0.354594	7.5552e-05	-0.0176948	0.899496	0.0546431	0.613596	0.244664	0.0202795	-0.305998	9.39791e-06	-0.171869	0.0696498	-0.168778	0.0653457	0.0687993	0.486228
FBgn0023023	CRMP	10.38	20.16	16.53	14.25	15.12	14.29	18.78	18.19	17.67	4.98	4.95	2.71	1.96	2.06	1.72	0.59	0.69	0.55	15.69	4.94381	14.5533	0.491155	18.2133	0.555368	4.21333	1.30201	1.91333	0.174738	0.61	0.072111	0.401773	0.0717391	0.573089	0.00775587	0.138396	0.227972	-2.04154	2.85462e-26	-1.80122	2.31705e-10	-1.82471	6.71999e-09	-3.0586	2.23769e-17	-5.1847	1.19351e-118	-4.87319	9.41759e-56
FBgn0037344	CG2926	33.46	39.75	42.92	36.13	39.28	35.94	45.63	44.63	43.98	105.72	111.99	103.03	63.16	65.71	70.54	95.24	88.87	92.83	38.71	4.81499	37.1167	1.87591	44.7467	0.831164	106.913	4.59766	66.47	3.74824	92.3133	3.21628	0.441278	1.7765e-05	0.560058	5.08975e-09	0.0856727	0.364746	1.2464	3.25955e-86	1.53781	6.31904e-62	0.32937	2.34466e-11	-0.446932	5.82375e-29	0.748463	2.04732e-41	1.08614	4.24005e-32
FBgn0037345	rev7	30.07	25.1	30.01	10.94	11.27	13.06	12.56	11.62	14.97	18.77	13.11	14.6	24.12	21.77	20.86	21.67	18.23	21.79	28.3933	2.85227	11.7567	1.14072	13.05	1.72792	15.4933	2.93384	22.25	1.68217	20.5633	2.02162	-0.775271	5.50611e-05	-0.776917	2.99842e-05	-0.0360837	0.919266	0.116528	0.668795	-0.808	0.000197249	-0.246936	0.104733	0.177298	0.474279	0.243604	0.216017	-0.633054	0.000183652
FBgn0014366	noi	72.22	77.53	69.26	57	68.56	50.36	59.48	58.83	47.61	56.53	65.32	67.05	78.11	73.89	79.24	96.78	91.22	93.38	73.0033	4.19028	58.64	9.21017	55.3067	6.67343	62.9667	5.64103	77.08	2.8198	93.7933	2.80295	0.175551	0.246231	-0.0571032	0.707781	-0.265748	0.115404	-0.176163	0.169559	-0.148516	0.203583	0.138795	0.011429	0.343536	1.82117e-05	0.114455	0.31802	0.190469	0.0315583
FBgn0283535	Vha26	149.51	183.76	194.58	342.58	318.71	414.13	310.05	315.37	356.36	436.88	441.66	397.82	435.24	439.95	453.88	399.09	351.11	400.42	175.95	23.5281	358.473	49.6557	327.26	25.3413	425.453	24.0502	443.023	9.6926	383.54	28.0931	1.53481	3.85449e-25	1.24778	2.00405e-27	-0.320275	0.0432068	-0.0379327	0.78641	1.34713	1.47927e-39	-0.352258	6.15989e-12	-0.384901	2.44257e-11	-0.473991	7.0452e-05	0.956792	6.51122e-20
FBgn0250753	kra	699.51	874.1	801.65	1084.25	1449.76	1160.58	1239.65	1221.22	1108.29	1207.47	1225.76	1115.23	1417.69	1403.44	1478.91	1434.24	1137.79	1339.85	791.753	87.7147	1231.53	192.808	1189.72	71.12	1182.82	59.2447	1433.35	40.0971	1303.96	151.449	1.13521	1.97768e-17	0.936125	9.34591e-20	-0.232632	0.112412	-0.336258	0.00138331	0.650441	5.1903e-12	-0.281932	0.000105483	-0.0953369	0.228859	-0.482585	2.57517e-05	0.550757	1.05658e-06
FBgn0037347	CG1427	81.1	89.43	84.05	41.55	36.08	40.92	35.39	32.2	35.75	30.46	26.76	32.73	38.97	41.7	40.28	42.08	40.19	45.02	84.86	4.22366	39.5167	2.99286	34.4467	1.95398	29.9833	3.01341	40.3167	1.36537	42.43	2.43395	-0.603577	1.53614e-06	-0.954421	7.32975e-21	-0.383675	0.00148956	-0.685449	2.13995e-07	-1.43858	1.39732e-34	-0.0669653	0.444946	0.274649	0.0248646	-0.463631	3.07739e-05	-1.16702	2.31264e-43
FBgn0261004	asl	70.19	61.84	70.23	29.13	27.34	24.42	29.67	30.06	26.85	57.81	59.07	56.55	54.34	52.17	56.18	79.47	79.79	80.87	67.42	4.83246	26.9633	2.37748	28.86	1.7516	57.81	1.26	54.23	2.00726	80.0433	0.733576	-0.829275	3.17964e-11	-0.880613	5.63923e-14	-0.084011	0.567432	0.822285	3.61507e-22	-0.156577	0.166651	0.416153	6.99206e-20	0.233262	1.71763e-05	1.00473	2.80222e-37	0.0738869	0.486315
FBgn0017550	Rga	165.14	168	168.48	98.15	103.97	86.41	92.32	91.92	85.32	137.66	148.93	148.77	141.93	135.93	136.27	162.01	159.35	167.85	167.207	1.80581	96.1767	8.94477	89.8533	3.93107	145.12	6.46104	138.043	3.37024	163.07	4.34801	-0.303895	0.00385325	-0.55096	7.72857e-10	-0.280218	0.00308626	0.314328	5.02352e-05	-0.138129	0.0905113	0.0957972	0.0324559	-0.0649354	0.2325	0.19714	0.00728242	-0.207656	0.00125632
FBgn0019637	Atu	93.86	96.14	90.54	54.51	59.63	44.94	56.25	52.53	46.41	67.03	69.81	65.5	86.16	79.03	83.61	100.01	98.94	101.18	93.5133	2.81605	53.0267	7.45649	51.73	4.96854	67.4467	2.185	82.9333	3.61284	100.043	1.12037	-0.327069	0.0149755	-0.511123	1.20314e-05	-0.216958	0.152049	0.0709006	0.547335	-0.404012	1.71036e-05	0.125602	0.0165341	0.331882	2.42508e-09	0.352461	0.000365991	-0.074605	0.356421
FBgn0044823	Spec2	44.07	50.57	52.5	16.45	19.77	20.5	20.54	18.96	22.78	53.05	54.73	59.46	85.23	80.31	85.52	94.89	83.42	100.86	49.0467	4.41663	18.9067	2.15862	20.76	1.91948	55.7467	3.32374	83.6867	2.92787	93.0567	8.86336	-0.87192	3.30395e-10	-0.890098	9.26184e-14	-0.0524957	0.837295	1.2743	4.56672e-25	0.252197	0.0135955	0.0126098	0.885026	0.510439	9.77293e-09	1.73093	4.31168e-49	0.756584	1.13958e-13
FBgn0037350	CG2911	16.07	13.46	15.27	12.73	17.61	13.94	17.26	15.38	16.54	16.1	16.96	16.54	17.02	17.14	17.99	19.82	16.41	16.43	14.9333	1.33717	14.76	2.54124	16.3933	0.948543	16.5333	0.430039	17.3833	0.528804	17.5533	1.96302	0.4762	0.0235866	0.476342	0.00561507	-0.0352035	0.911866	-0.116423	0.60659	0.211034	0.277349	-0.129005	0.423779	-0.147012	0.483712	-0.314737	0.118527	0.0601364	0.753908
FBgn0037351	RpL13A	4082.84	3065.27	3182.05	6052.7	5719.92	5312.75	5589.91	5577.54	5189.87	2105.42	2243.73	2217.99	2284.88	2418.6	2176.14	1689.64	2045.6	1741.52	3443.39	556.853	5695.12	370.598	5452.44	227.476	2189.05	73.5575	2293.21	121.444	1825.59	192.295	1.21231	6.62191e-14	0.999804	2.35393e-10	-0.245817	0.00262607	-1.65963	6.92216e-157	-0.595152	0.000110078	-0.474074	1.48304e-08	-0.495034	7.76617e-10	-2.20635	3.2204e-123	-1.09255	2.39132e-11
FBgn0051551	CG31551	1.09	1.15	1.26	0.24	0.32	0.19	0.21	0.1	0.4	0.24	0.14	0.12	0.07	0.08	0.09	0.27	0.24	0.28	1.16667	0.0862168	0.25	0.0655744	0.236667	0.151767	0.166667	0.064291	0.08	0.01	0.263333	0.0208167	-1.73035	4.56305e-07	-1.96775	6.67422e-05	-0.272365	0.796155	-0.835612	0.27112	-2.71323	1.14076e-08	1.57195	0.0129212	0.39861	0.626243	-0.489237	0.399066	-2.31911	2.63256e-11
FBgn0051549	CG31549	113.28	108.13	115.8	125.57	134.89	104.54	128.82	124.78	110.81	79.93	83.33	73.92	138.47	128.37	133.53	161.81	176.03	146.65	112.403	3.90943	121.667	15.5469	121.47	9.45024	79.06	4.76494	133.457	5.0504	161.497	14.6925	0.606568	1.26812e-06	0.455872	4.00583e-05	-0.183635	0.200636	-0.896104	1.01828e-16	-0.438321	5.31974e-05	0.126204	0.157405	0.790772	3.33442e-15	-0.156378	0.196221	0.348723	0.00218769
FBgn0037354	CG12171	46.7	39.46	42.05	56.11	64.58	51.69	71.25	68.69	56.52	82.53	87.92	78.49	83.9	78.03	83.48	119.17	135.15	130.76	42.7367	3.66852	57.46	6.55018	65.4867	7.87015	82.98	4.73108	81.8033	3.27454	128.36	8.25591	0.916177	1.11956e-09	0.955414	4.12976e-10	0.0057923	0.982063	0.254107	0.0251132	1.0211	6.2734e-14	0.501727	3.87435e-12	0.389831	2.02723e-05	0.593646	1.09192e-08	1.41019	2.96231e-28
FBgn0051546	CG31546	3.25	1.99	3.27	0.13	0.46	0.34	0.57	0.54	0.36	0	0.2	0.36	0.37	0	0.15	0.16	0	0.13	2.83667	0.733303	0.31	0.167033	0.49	0.113578	0.186667	0.18037	0.173333	0.1861	0.0966667	0.085049	-2.68337	4.2486e-06	-2.20863	3.35277e-06	0.452922	0.72098	-1.08955	0.49639	-3.99786	9.83831e-06	-0.907708	0.661618	-1.05697	0.639539	-2.11575	0.149182	-4.8509	4.97583e-08
FBgn0051548	CG31548	45.52	37	36.46	106.28	101.75	95.9	89.09	88.25	82.15	72.74	71.35	74.92	70.52	69.23	71.66	79.47	74.73	75.66	39.66	5.08209	101.31	5.20397	86.4967	3.78768	73.0033	1.79951	70.47	1.21577	76.62	2.51159	1.84115	2.0943e-32	1.46289	9.94765e-22	-0.411499	1.60794e-06	-0.754571	6.91413e-17	0.939853	2.36855e-09	-0.0240465	0.772367	-0.162264	0.089971	-0.968774	1.88333e-32	0.772891	2.12305e-07
FBgn0037356	CG12170	42.45	38.59	37.37	31.64	35.74	28.98	34.08	32.88	29.37	30.48	29.63	29.61	21.61	21.59	20.89	17.56	22.31	20.14	39.47	2.65187	32.12	3.40547	32.11	2.44759	29.9067	0.496622	21.3633	0.410041	20.0033	2.37795	0.192558	0.221598	0.0428084	0.790993	-0.183621	0.211847	-0.381137	0.00169446	-0.336388	0.0167657	-0.250364	0.0460171	-0.822732	2.68797e-09	-1.25528	4.85007e-21	-1.16104	7.29068e-15
FBgn0027951	MTA1-like	70.57	90.19	95.41	48.32	49.05	54.43	52.43	55.75	60.88	113.71	118.72	115.28	125.74	120.54	125.5	136.38	131.1	141.31	85.39	13.0972	50.6	3.3369	56.3533	4.25719	115.903	2.56251	123.927	2.93539	136.263	5.106	-0.248236	0.0721924	-0.245776	0.065416	-0.0309312	0.878387	0.912558	1.32046e-26	0.514427	1.65344e-06	-0.00700135	0.88598	-0.000399661	0.993942	0.860443	1.59801e-25	0.507897	3.92455e-06
FBgn0262125	Sec23	101.32	92.08	91.09	104.81	122.41	101.51	128.1	133.13	108.95	105.25	104.13	102.92	104.22	104.07	102.39	113.45	117.25	117.04	94.83	5.64226	109.577	11.2358	123.393	12.7586	104.1	1.16529	103.56	1.01602	115.913	2.13589	0.698869	7.08713e-08	0.72122	5.68657e-08	-0.0110945	0.959262	-0.352386	1.97233e-05	0.198424	0.0814306	0.0163354	0.765396	-0.0806231	0.161903	-0.483829	4.64544e-10	0.115242	0.278355
FBgn0037358	elm	92.32	134.32	126.98	92.71	92.92	96.52	101.97	100.74	104.54	136.7	134.98	132.57	141.22	140.73	141.71	134.5	136.02	141.45	117.873	22.4321	94.05	2.14166	102.417	1.93898	134.75	2.07458	141.22	0.49	137.323	3.65372	0.180763	0.243756	0.151004	0.317177	-0.0624984	0.626447	0.237596	0.0056238	0.268725	0.0520957	-0.185346	0.000305949	-0.208059	0.00130079	-0.0216849	0.794734	0.0555897	0.69519
FBgn0037359	MED27	48.01	49.84	47.05	23.36	22.62	19.73	26.76	24.66	24.59	28.99	35.19	30.52	45.59	42.36	43.68	49.69	51.74	57.67	48.3	1.41743	21.9033	1.91818	25.3367	1.23314	31.5667	3.2298	43.8767	1.62396	53.0333	4.14423	-0.646986	9.34496e-07	-0.5872	6.04239e-07	0.0267242	0.899496	0.250161	0.0937262	-0.544791	3.45401e-05	0.131346	0.176749	0.513158	5.42962e-05	0.711999	1.62338e-09	-0.0352115	0.758106
FBgn0037360	CG2182	165.84	173.9	172.85	108.31	99.63	85.08	92.71	92.1	82.39	183.75	178.76	179.46	151.61	150.6	154.61	269.98	280.26	266.27	170.863	4.3819	97.6733	11.738	89.0667	5.7902	180.657	2.70167	152.273	2.08567	272.17	7.24756	-0.312242	0.00835202	-0.594468	2.21762e-10	-0.314539	0.00675513	0.609382	1.19641e-11	0.148482	0.054781	0.691856	2.32106e-59	0.356002	1.66833e-11	0.91396	3.45356e-24	0.500419	2.94938e-14
FBgn0046222	Wdr33	51.98	57.66	58.35	41.23	45.8	34.53	49.15	52.1	42.88	70.79	69.63	66.66	87.38	82.8	86.85	100.03	94.53	100.32	55.9967	3.4956	40.52	5.66845	48.0433	4.70857	69.0267	2.13008	85.6767	2.50532	98.2933	3.26237	0.0287049	0.839777	0.126815	0.299622	0.0652999	0.754985	0.492333	1.66859e-06	0.372559	5.73785e-06	0.0547967	0.270544	0.274562	5.64309e-07	0.715278	8.90981e-14	0.642719	2.3428e-22
FBgn0010772	Xe7	50.08	56.95	58.35	37.18	40.03	33.23	41.7	42.18	38.7	46.88	51.49	48.3	38.71	36.17	38.4	39.94	32.65	38.76	55.1267	4.42624	36.8133	3.4148	40.86	1.88595	48.89	2.36095	37.76	1.38568	37.1167	3.91298	-0.084601	0.452351	-0.0833515	0.410769	-0.0317727	0.845806	0.130984	0.157399	-0.102698	0.244628	-0.165049	0.0415237	-0.628925	1.33298e-14	-0.550724	2.06196e-08	-0.737665	3.77244e-13
FBgn0037363	Atg17	43.3	50.51	56.94	22.03	18.94	20.82	30.11	30.93	31.11	66.5	67.19	61.3	53.44	54.61	57.79	63.69	61.16	63.35	50.25	6.82372	20.5967	1.55706	30.7167	0.533042	64.9967	3.21994	55.28	2.25107	62.7333	1.37311	-0.782303	2.91443e-10	-0.358161	0.00081116	0.391933	0.000110795	1.37695	1.71453e-51	0.44427	2.80381e-05	0.0380345	0.447033	-0.287529	4.35944e-09	1.03908	2.86691e-34	0.152584	0.145379
FBgn0037364	Rab23	9.7	11.67	14.28	19.94	18.41	20.55	17.2	18.17	21.11	100.62	98	96.6	74.65	75.31	78.82	107.3	101.3	108.74	11.8833	2.29744	19.6333	1.10247	18.8267	2.03603	98.4067	2.04062	76.26	2.24145	105.78	3.94604	1.23095	3.69287e-15	1.01895	4.78177e-10	-0.244985	0.119645	2.04425	7.8906e-109	3.12342	8.05488e-128	0.328943	4.12012e-12	-0.129793	0.0247589	1.86242	2.60603e-102	2.98669	1.50249e-114
FBgn0261261	plx	22.79	30.06	29.58	7.16	6.33	5.99	12.9	12.49	12.62	15.75	18.44	19.45	10.65	11.23	11.7	8.12	8.54	8.62	27.4767	4.06586	6.49333	0.601858	12.67	0.209523	17.88	1.91251	11.1933	0.525959	8.42667	0.268576	-1.57852	1.27939e-33	-0.764797	3.29008e-11	0.782	1.97003e-16	1.17866	8.3854e-25	-0.54908	2.22509e-05	-0.556579	6.73118e-13	-1.31812	1.15929e-38	-0.190996	0.101552	-1.87241	1.78614e-57
FBgn0037365	CG2104	0.03	0.02	0.1	0.03	0.08	0.03	0.08	0.06	0.15	0.16	0	0	0.03	0	0	0	0	0.04	0.05	0.043589	0.0466667	0.0288675	0.0966667	0.0472582	0.0533333	0.092376	0.01	0.0173205	0.0133333	0.023094	0.400233	0.83488	1.30914	0.366173	0.888351	0.64651	-0.0963932	0.971838	0.154549	NA	0.965019	NA	-1.82258	0.649602	-1.94362	0.455209	-1.64786	0.505654
FBgn0004878	cas	8.53	6.51	7.83	8.92	10.05	7.92	14.7	13.82	14.59	0.99	0.52	0.84	0.76	0.99	0.62	0	0	0	7.62333	1.02574	8.96333	1.06566	14.37	0.479479	0.783333	0.240069	0.79	0.186815	0	0	0.720854	6.45777e-05	1.2536	8.03538e-16	0.498443	2.39328e-05	-3.82521	1.82794e-48	-3.24594	3.94758e-27	-7.41495	1.85281e-08	-7.48801	5.88564e-08	-11.3361	6.45267e-21	-10.7157	1.56777e-18
FBgn0037368	CG1239	31.78	28.82	30.83	31.36	29.78	28.97	24.18	27.69	25.38	82.48	76.82	74.81	100.53	101.21	106.62	104.48	97.82	106.98	30.4767	1.5113	30.0367	1.2155	25.75	1.78401	78.0367	3.97711	102.787	3.33713	103.093	4.73482	0.47239	0.00068728	0.101103	0.523342	-0.404435	0.00107377	1.09971	3.06564e-26	1.4225	1.29624e-30	-0.136863	0.032059	0.167018	0.0591769	1.21526	4.83283e-45	1.5849	2.5857e-52
FBgn0037369	CG2100	44.69	44.14	43.62	58.71	62.11	55.47	49.2	48.56	47.87	50	51.1	41.08	58.84	57.53	58.95	57.93	57.98	59.94	44.15	0.53507	58.7633	3.32032	48.5433	0.665157	47.3933	5.4951	58.44	0.79	58.6167	1.14631	0.906595	7.75826e-17	0.48118	3.80316e-06	-0.459099	3.19088e-09	-0.583023	5.50832e-08	0.173285	0.194162	-0.140624	0.0243706	0.0647278	0.557021	-0.569456	1.25728e-14	0.236417	0.00841129
FBgn0037370	CG1236	128.26	131.07	125.96	95.64	99.69	90.21	95.83	88.83	82.69	77.09	77.1	79.09	116.12	112.36	118.4	118.91	110.58	118.4	128.43	2.55924	95.18	4.75671	89.1167	6.57469	77.76	1.15182	115.627	3.05007	115.963	4.66907	0.0623286	0.592161	-0.183704	0.104739	-0.279108	0.00400902	-0.572641	1.12507e-12	-0.6583	4.21124e-12	-0.13783	0.0141383	0.345735	1.69231e-06	-0.27929	6.06002e-05	-0.317952	7.30849e-05
FBgn0037371	Sym	56.41	58.81	54.55	27.35	28.7	24.26	32.83	30.25	28.65	52.31	52.43	48.83	50.39	50.18	53.52	73.64	66.45	71.95	56.59	2.1357	26.77	2.27612	30.5767	2.10906	51.19	2.0447	51.3633	1.87068	70.68	3.75948	-0.586679	1.69401e-07	-0.544691	3.24471e-07	0.00889217	0.960167	0.658072	1.31496e-15	-0.0769657	0.442533	0.317537	5.64643e-10	0.229777	0.00010302	0.836302	2.34532e-28	0.149392	0.0784789
FBgn0027497	Madm	20.71	25.09	25.5	30.46	31.97	26.93	34.85	34.12	28.76	40.99	49.14	47.78	28.64	28.62	29.02	34.88	38.16	36.87	23.7667	2.65508	29.7867	2.58659	32.5767	3.32542	45.97	4.36609	28.76	0.225389	36.6367	1.6524	0.825722	7.80999e-14	0.804533	2.37215e-11	-0.053544	0.771252	0.345467	0.000388666	1.02194	9.80372e-21	0.200633	0.00163886	-0.561758	1.29428e-10	-0.267861	0.00241162	0.455691	7.45206e-06
FBgn0037372	CG2091	71.32	74.28	70.5	39.35	45.69	43.32	48.44	47.3	47.56	28.11	31.8	24.83	71.68	71.73	74.48	104.07	98.17	101.32	72.0333	1.9884	42.7867	3.20347	47.7667	0.597439	28.2467	3.48701	72.63	1.60234	101.187	2.95226	-0.254965	0.0451691	-0.247712	0.0183015	-0.0269994	0.882829	-0.872317	1.58826e-11	-1.27552	4.93195e-24	0.334382	1.74876e-09	1.59452	3.45137e-62	0.674668	1.00125e-14	0.319273	6.70553e-05
FBgn0266672	Sec8	59.69	67.82	65.78	42.58	40.15	37.6	60.36	62.54	54.02	63.02	65.11	63.39	63.92	62.53	64.82	78.07	72.71	77.47	64.43	4.22979	40.11	2.49024	58.9733	4.42603	63.84	1.1153	63.7567	1.1537	76.0833	2.93676	-0.185702	0.072491	0.219881	0.039671	0.373205	0.000181761	0.391221	2.11111e-07	0.0566231	0.483339	0.111961	0.0167444	0.0195955	0.742788	0.358426	5.70644e-07	0.0711768	0.330131
FBgn0027608	CG2082	6.42	3.83	4.63	3	2.49	1.95	8.49	8.74	10.18	0.89	2.04	0.81	0.43	0.68	0.68	0.62	0.32	0.37	4.96	1.32616	2.48	0.525071	9.13667	0.912159	1.24667	0.68821	0.596667	0.144338	0.436667	0.160728	-0.520198	0.121028	1.21461	1.64348e-06	1.70456	4.0145e-18	-1.2526	0.00473167	-1.9204	9.71064e-06	-0.613334	0.393804	-1.76957	0.0146618	-3.07724	2.09312e-10	-3.69385	9.4306e-15
FBgn0037374	jagn	52.23	64.77	66.14	76.42	81.85	79.34	69.34	76.98	68.83	110.55	115.38	119.4	128.43	124.87	126.72	154.78	147.94	158.01	61.0467	7.66612	79.2033	2.71758	71.7167	4.56531	115.11	4.43117	126.673	1.78046	153.577	5.14172	0.878645	1.54907e-15	0.583939	6.73724e-07	-0.327918	0.00148061	0.256345	0.00122645	0.986159	8.06943e-23	0.13497	0.00602868	0.185011	0.0027978	0.388864	7.78353e-09	1.16386	2.53602e-33
FBgn0037375	kat-60L1	4.99	4.41	4.87	0.14	0.12	0.08	0.72	0.66	0.41	0.1	0.04	0.08	0.07	0.04	0.03	0.04	0.06	0.03	4.75667	0.306159	0.113333	0.0305505	0.596667	0.164418	0.0733333	0.0305505	0.0466667	0.0208167	0.0433333	0.0152753	-4.8809	9.53178e-40	-2.65809	9.90607e-22	2.19569	0.000377888	-0.887327	0.560229	-5.93622	2.67195e-14	-0.40345	0.834649	-1.21456	0.545539	-2.17118	0.13435	-7.2063	2.86753e-16
FBgn0037376	Hat1	176.84	250.52	188.22	44.99	51.14	37.43	65.55	61.96	55.46	109.88	116.43	103.96	174.11	165.08	180.14	182.07	178.35	183.43	205.193	39.6643	44.52	6.86707	60.99	5.11446	110.09	6.23765	173.11	7.57964	181.283	2.62978	-1.70877	9.88014e-26	-1.40288	8.62092e-21	0.27293	0.0693868	1.03038	1.52119e-20	-0.82611	4.59832e-09	-0.0781211	0.113934	0.481247	1.60534e-17	1.46253	3.92427e-47	-0.345804	0.0113149
FBgn0028690	Rpn5	269.25	274.85	249.47	177.57	203.61	182.15	194.5	208.67	198.89	313.06	335.61	280.64	328.51	312.51	323.21	383.44	361.61	368.27	264.523	13.3339	187.777	13.902	200.687	7.25384	309.77	27.6323	321.41	8.15046	371.107	11.188	-0.00112239	0.993535	-0.0545778	0.665313	-0.087437	0.489052	0.443105	5.093e-07	0.29369	0.00987598	0.0626995	0.150135	0.0248565	0.724834	0.417041	2.76231e-10	0.315901	0.00022183
FBgn0037377	CG1218	33.86	36.25	33.46	38.05	47.38	38.06	34.78	34.3	33.05	74.25	74.41	71.45	82.24	73.34	81.43	96.07	103.05	100.62	34.5233	1.50865	41.1633	5.38379	34.0433	0.893103	73.37	1.66469	79.0033	4.92128	99.9133	3.54325	0.748307	3.23901e-08	0.32545	0.00391311	-0.45728	0.000177616	0.555661	3.05205e-07	1.15651	1.62155e-31	0.191943	0.00550425	0.207733	0.00632601	0.713651	2.91671e-12	1.3614	1.72819e-54
FBgn0037378	CG2046	115.68	110.66	100.09	60.02	67.91	59.8	73.56	71.82	70.5	86.65	89.54	76.46	160.19	151.26	152.98	170.33	180.9	156.75	108.81	7.95795	62.5767	4.62011	71.96	1.5348	84.2167	6.87113	154.81	4.73792	169.327	12.1062	-0.306998	0.0338477	-0.255462	0.0581331	0.0170763	0.920509	0.153401	0.189904	-0.30273	0.028953	-0.0204739	0.819518	0.765988	5.06455e-15	0.867989	1.48225e-19	0.462842	0.000183911
FBgn0037379	CG10979	19.25	20.12	20.87	31.59	30.46	30.26	19.57	19.25	18.54	79.94	85.7	80.4	56.07	59.03	61.59	86.58	82.27	87.85	20.08	0.81074	30.77	0.717147	19.12	0.527162	82.0133	3.20102	58.8967	2.76241	85.5667	2.92476	1.11392	1.68014e-32	0.275805	0.00272129	-0.871002	3.62364e-32	1.13409	1.35736e-61	2.09858	1.37311e-169	0.394987	2.99723e-15	-0.173254	0.000318448	0.909452	3.19141e-48	1.92093	1.46739e-189
FBgn0263353	CG11000	4.55	3.07	4.16	0.07	0.11	0.14	0.27	0.38	0.27	0.29	0.38	0.44	0.12	0.14	0.17	0.91	0.71	1.11	3.92667	0.767094	0.106667	0.0351188	0.306667	0.0635085	0.37	0.0754983	0.143333	0.0251661	0.91	0.2	-4.69977	2.69023e-53	-3.34502	3.51868e-37	1.32437	0.0122216	1.50379	0.0102686	-3.33791	1.22044e-25	2.51769	1.95019e-07	1.07253	0.0287963	2.52839	9.5147e-08	-2.25975	8.25896e-15
FBgn0261561	CG42675	11.87	5.79	8.05	0.37	1.23	0.76	1.1	1.04	1.04	0.96	0.83	0.47	0.22	0.07	0.21	0	0	0	8.57	3.07317	0.786667	0.43062	1.06	0.034641	0.753333	0.253837	0.166667	0.083865	0	0	-2.96285	2.09981e-11	-2.68369	1.37654e-16	0.241049	0.770982	-0.347842	0.671343	-3.46686	1.76062e-13	-4.0935	0.0368588	-6.35467	4.90303e-05	-6.75025	3.81718e-06	-9.81631	6.76022e-15
FBgn0037382	Hpr1	58.74	63.64	56.28	32.81	32.38	26.15	31.04	30.36	27.84	39.34	39.64	34.92	35.18	37.27	37.7	45.6	42.46	44.42	59.5533	3.7468	30.4467	3.72723	29.7467	1.68586	37.9667	2.64275	36.7167	1.34805	44.16	1.58606	-0.475606	0.000393651	-0.657373	8.52979e-09	-0.214633	0.105753	0.0442684	0.741532	-0.579253	3.35556e-07	0.122889	0.075222	-0.0207428	0.829099	-0.0267462	0.81075	-0.601766	3.97141e-11
FBgn0284081	CG46303	2.11	1.24	1.77	1.1	0.22	1	1.15	1.66	1.6	0	0	0	2.78	2.56	3.23	0	0	0	1.70667	0.438444	0.773333	0.481802	1.47	0.278747	0	0	2.85667	0.341516	0	0	-0.688518	0.462893	0.114682	0.87339	0.775583	0.506054	-4.03368	0.0565091	-4.85959	0.00206801	-6.26105	7.3787e-06	NA	NA	-4.78684	0.0159046	-5.56472	0.00026495
FBgn0037383	CG2023	6.7	7.77	6.85	7.82	8.63	7.41	9.5	9.59	10.56	35.46	32.43	35.62	60.73	54.77	55.76	58.03	66.77	57.52	7.10667	0.579339	7.95333	0.620833	9.88333	0.587736	34.5033	1.79734	57.0867	3.19381	60.7733	5.19952	0.661914	0.00115718	0.826696	1.14569e-05	0.130291	0.600737	1.8336	3.26792e-34	2.34858	3.24583e-52	-0.0633254	0.570611	0.580849	8.2262e-06	2.36228	1.36236e-70	2.92475	9.4195e-97
FBgn0037384	dgrn	44.21	68.5	53.95	28.02	32.45	35.83	34.83	32.75	40.05	66.39	72.51	76.59	85.22	81.77	87.18	96.7	90.54	94.13	55.5533	12.2241	32.1	3.91675	35.8767	3.76087	71.83	5.13389	84.7233	2.73898	93.79	3.09404	-0.284726	0.14527	-0.278136	0.129038	-0.0274777	0.919457	0.87612	2.82431e-12	0.443935	0.00522163	0.00308887	0.965063	0.154907	0.0537186	0.977719	1.08212e-17	0.591156	9.29318e-05
FBgn0037385	glob3	0.24	0.19	0.41	0	0	0	0	0	0	0	0	0	0	0	0	0	0	0	0.28	0.115326	0	0	0	0	0	0	0	0	0	0	-5.43971	0.00806403	-5.50771	0.00495353	NA	NA	NA	NA	-3.59992	0.0720243	NA	NA	NA	NA	NA	NA	-4.37623	0.0211478
FBgn0037386	CG1208	0.29	0.44	0.47	2.5	4.24	3.39	3.61	3.5	4.07	0	0.17	0.24	0.11	0.09	0.03	0	0	0	0.4	0.0964365	3.37667	0.870077	3.72667	0.302379	0.136667	0.123423	0.0766667	0.0416333	0	0	3.57347	8.52043e-25	3.56393	5.43509e-34	-0.045467	0.919266	-5.01759	2.56485e-14	-1.56705	0.109938	-3.65976	0.0995012	-4.49861	0.0934294	-9.48309	2.66628e-14	-6.01435	3.37446e-05
FBgn0037387	CG1213	0.92	0.46	1.08	1.2	11.79	4.58	6.79	3.63	6.15	0.32	0.06	0.2	0.27	0.16	0.06	0	0	0	0.82	0.32187	5.85667	5.4092	5.52333	1.67061	0.193333	0.130128	0.163333	0.10504	0	0	3.31464	0.000467056	3.08095	4.63362e-17	-0.264965	0.874356	-5.22255	9.73906e-06	-2.07586	0.0170774	-4.45261	0.0197116	-4.75533	0.0322635	-10.0172	4.8769e-08	-6.81169	1.20995e-06
FBgn0037388	CG14676	0.53	0.51	0.38	0	0	0	0	0	0	0	0.21	0	0	0	0	0	0	0	0.473333	0.0814453	0	0	0	0	0.07	0.121244	0	0	0	0	-6.02793	0.000750871	-6.09412	0.000388485	NA	NA	3.61851	NA	-2.44405	0.119513	NA	NA	-2.38503	NA	NA	NA	-4.94538	0.00297118
FBgn0029088	disp	17.88	22.74	22.98	22.73	22.08	22.55	19.68	20.2	21.73	32.33	29.77	29.19	37.93	38.57	39.68	49.13	47.18	47.17	21.2	2.87771	22.4533	0.335609	20.5367	1.06566	30.43	1.67081	38.7267	0.885457	47.8267	1.12873	0.587051	4.59408e-07	0.306658	0.0123906	-0.313311	0.000875468	0.158715	0.0931325	0.595905	2.42943e-07	0.159177	0.00107451	0.415872	7.56893e-10	0.523408	2.30856e-14	1.00716	4.01098e-23
FBgn0085316	CG34287	0.46	0.63	0.92	0.24	0.22	0.14	0.13	0.24	0.14	0.13	0	0.2	0	0	0	0	0	0	0.67	0.232594	0.2	0.052915	0.17	0.0608276	0.11	0.101489	0	0	0	0	-1.24834	0.16235	-1.6125	0.0675065	-0.396442	0.824068	-1.30981	0.508126	-2.76171	0.0507051	NA	NA	-2.79889	0.504522	-4.06173	0.0663102	-5.41379	0.000589226
FBgn0028436	ECSIT	25.49	24.71	23.41	21.22	25.13	21.52	20.57	20.45	18.96	35.3	34.03	34.74	29.99	26.34	27.95	38.79	42.61	32.91	24.5367	1.05078	22.6233	2.17601	19.9933	0.896902	34.69	0.636475	28.0933	1.82922	38.1033	4.88632	0.375886	0.0128608	0.0472677	0.760953	-0.363102	0.00553569	0.336052	0.00803964	0.564314	1.65903e-05	0.28706	0.0221885	-0.104637	0.49784	0.181252	0.224289	0.457186	0.00236758
FBgn0037391	CG2017	111.11	97.01	119.95	19.57	16.96	15.69	23.9	22.79	21.37	9.25	9.43	13.22	11.04	9.52	10.96	11.21	11.41	10.97	109.357	11.5701	17.4067	1.97819	22.6867	1.26816	10.6333	2.24193	10.5067	0.855414	11.1967	0.220303	-2.15682	1.83258e-56	-1.92434	6.06292e-59	0.200477	0.155187	-1.00405	2.7004e-09	-3.31045	9.06076e-92	-0.0568226	0.676731	-0.149714	0.463494	-1.20467	1.44234e-20	-3.4639	6.39608e-169
FBgn0083949	side-III	0.44	0.28	0.36	0	0	0	0.01	0.02	0.01	0.07	0.2	0.14	0	0.01	0	0	0	0	0.36	0.08	0	0	0.0133333	0.0057735	0.136667	0.0650641	0.00333333	0.0057735	0	0	-6.07899	1.25469e-09	-4.25152	9.96426e-12	1.79558	0.446998	4.87484	9.68601e-05	-1.33893	0.0140877	-1.16433	NA	-6.31316	6.20706e-05	-1.5091	NA	-7.66523	3.86355e-09
FBgn0040679	CG11373	0	0	0	0	0	0	0	0	0	0	0	0	0	0	0	0	0	0	0	0	0	0	0	0	0	0	0	0	0	0	NA	NA	NA	NA	NA	NA	NA	NA	NA	NA	NA	NA	NA	NA	NA	NA	NA	NA
FBgn0011281	Obp83a	0.33	0.12	0.09	0	0	0	0	0.07	0	0	0	0	0	0	0	0	0	0	0.18	0.130767	0	0	0.0233333	0.0404145	0	0	0	0	0	0	-4.48351	0.095102	-2.64718	0.250504	1.81452	NA	NA	NA	-2.6343	NA	NA	NA	NA	NA	NA	NA	-3.38737	0.168013
FBgn0010403	Obp83b	0.23	0.29	0.36	0.07	0	0.16	0.06	0	0	0	0	0	0	0.09	0.08	0	0	0	0.293333	0.0650641	0.0766667	0.0802081	0.02	0.034641	0	0	0.0566667	0.0493288	0	0	-1.46073	0.46525	-3.47499	0.12413	-2.05907	NA	-0.931822	NA	-2.52627	NA	-0.819865	NA	NA	NA	-1.6984	NA	-3.25041	0.171337
FBgn0003261	Rm62	969.21	1029.98	1155.83	795.85	815.26	764.16	819.19	798.7	797.67	517.58	554.36	557.29	569.19	587.35	596.63	458.19	462.26	477.29	1051.67	95.1825	791.757	25.7947	805.187	12.1382	543.077	22.1293	584.39	13.9574	465.913	10.0604	0.0902308	0.339882	-0.0363915	0.696025	-0.159608	0.0116254	-0.824724	9.61157e-53	-0.884001	1.20991e-28	-0.471869	2.94135e-40	-0.455175	7.65961e-27	-1.33118	5.42839e-184	-1.34396	6.48621e-69
FBgn0037395	CG10280	0.14	0.54	0.07	0.03	0.02	0.02	0.18	0.13	0.1	0	0	0	0	0	0	0	0	0	0.25	0.253574	0.0233333	0.0057735	0.136667	0.0404145	0	0	0	0	0	0	-2.82107	0.103229	-0.545085	0.690619	2.24041	0.277008	-0.474683	NA	-3.43226	0.125902	NA	NA	NA	NA	-1.29372	NA	-4.20047	0.0530841
FBgn0037396	CG11459	0.17	0.04	0.1	0.09	0.26	0.6	0.19	0.3	0.84	0	0.09	0	0	0.04	0	0	0	0	0.103333	0.0650641	0.316667	0.259679	0.443333	0.347898	0.03	0.0519615	0.0133333	0.023094	0	0	2.0845	0.105399	2.412	0.0303758	0.286177	0.870406	-3.37136	0.0862146	-1.43169	NA	-0.0476813	NA	-1.79748	NA	-5.21616	0.00665845	-3.22861	0.213286
FBgn0037398	CG15580	0.24	0.08	0.09	0.01	0	0.01	0	0	0.01	0	0	0	0.02	0	0	0	0	0	0.136667	0.0896289	0.00666667	0.0057735	0.00333333	0.0057735	0	0	0.00666667	0.011547	0	0	-3.72333	0.0327096	-4.737	0.0108287	-1.1063	NA	0.0174408	NA	-3.78632	0.0573398	-0.000653132	NA	NA	NA	-0.823401	NA	-4.57377	0.0163773
FBgn0037399	Or83c	0	0	0	0	0.02	0.11	0	0	0	0	0	0	0	0	0	0	0	0	0	0	0.0433333	0.0585947	0	0	0	0	0	0	0	0	3.28656	0.447705	NA	NA	-3.51431	NA	-1.41653	NA	NA	NA	NA	NA	NA	NA	-2.23345	0.610655	NA	NA
FBgn0026077	Gasp	0.03	0	0.07	11.71	23.57	19.07	31.63	24.28	33.96	0.75	0.78	1.52	0.34	0.49	0.15	0	0	0.04	0.0333333	0.0351188	18.1167	5.9872	29.9567	5.05229	1.01667	0.436157	0.326667	0.170392	0.0133333	0.023094	9.48975	1.75018e-33	10.0594	1.87118e-40	0.538012	0.0618441	-4.51389	5.43106e-35	4.89625	2.44762e-06	-4.15973	0.0117807	-5.8652	6.17438e-05	-10.3754	3.31245e-17	-0.909118	0.779694
FBgn0046878	Obp83cd	0.13	0.05	0.08	2.7	1.55	3.18	2.83	2.79	3.93	0.13	0	0	0.05	0.1	0	0	0	0	0.0866667	0.0404145	2.47667	0.837636	3.18333	0.646942	0.0433333	0.0750555	0.05	0.05	0	0	5.27423	4.84074e-11	5.48187	7.12675e-14	0.178011	0.790197	-5.8606	1.98106e-05	-0.724965	NA	-1.5098	NA	-1.72058	NA	-7.63196	1.32706e-08	-2.44572	0.414163
FBgn0046876	Obp83ef	0.04	0.05	0.12	2.09	1.08	1.42	2.51	2.03	2.83	0.13	0	0	0	0	0.04	0	0	0	0.07	0.043589	1.53	0.513907	2.45667	0.402658	0.0433333	0.0750555	0.0133333	0.023094	0	0	4.85293	8.29989e-08	5.37457	2.42142e-11	0.503703	0.354466	-5.16082	0.00033322	-0.42483	NA	0.0291005	NA	-1.7207	NA	-6.93359	6.84801e-07	-2.15083	0.50524
FBgn0046875	Obp83g	0.42	0.44	0.54	0.06	0.22	0	0.35	0.42	0.19	0	0	0.34	0.08	0	0	0	0	0	0.466667	0.064291	0.0933333	0.113725	0.32	0.117898	0.113333	0.196299	0.0266667	0.046188	0	0	-1.84385	0.268655	-0.195622	0.868911	1.61538	0.467602	-0.340704	NA	-2.3636	0.204687	0.0623946	NA	-1.6874	NA	-2.0738	NA	-4.05577	0.038785
FBgn0037402	Vha14-2	0.57	0.45	0.64	0	0	0	0	0.05	0	0	0	0	0	0	0	0	0	0	0.553333	0.0960902	0	0	0.0166667	0.0288675	0	0	0	0	0	0	-6.25016	0.00014798	-4.58064	0.00163524	1.55501	NA	NA	NA	-4.40716	0.00649771	NA	NA	NA	NA	NA	NA	-5.17369	0.000843544
FBgn0051559	CG31559	0	0.12	0	0.66	1.8	0.69	0.8	0.76	0.81	0.68	0.49	1.04	0.12	0.08	0.07	0	0	0	0.04	0.069282	1.05	0.649692	0.79	0.0264575	0.736667	0.279344	0.09	0.0264575	0	0	5.3803	7.10905e-08	4.84674	2.60285e-07	-0.588125	0.3718	-0.81619	0.218351	4.41957	0.000115861	-3.70456	0.0814647	-6.77726	4.30808e-06	-7.62693	3.26782e-08	-2.46263	0.566289
FBgn0037405	CG1077	0.03	0.02	0.17	0.01	0.02	0.02	0.04	0.01	6.69	125.84	72.32	118.1	5.14	1.93	3.31	0	0	0	0.0733333	0.083865	0.0166667	0.0057735	2.24667	3.84807	105.42	28.9255	3.46	1.61025	0	0	-1.52	0.403401	5.30148	NA	6.76929	NA	12.2107	3.75117e-72	10.5031	7.17832e-46	-9.14448	1.34069e-12	-14.1711	2.06732e-29	-1.98892	NA	-3.63024	0.144802
FBgn0037406	Osi1	0.07	0	0	0	0.04	0	0	0	0	0	0	0	0	0	0	0	0	0	0.0233333	0.0404145	0.0133333	0.023094	0	0	0	0	0	0	0	0	-0.339764	NA	-2.04865	NA	-1.7518	NA	0.345083	NA	-0.134302	NA	NA	NA	NA	NA	-0.477313	NA	-0.895226	NA
FBgn0037408	NPFR	0	0.04	0.04	0.55	0.57	0.45	0.62	0.41	0.56	0.14	0	0.07	0	0	0.08	0	0	0	0.0266667	0.023094	0.523333	0.064291	0.53	0.108167	0.07	0.07	0.0266667	0.046188	0	0	4.74282	1.80891e-08	4.60863	4.03258e-08	-0.166157	0.800177	-3.15537	0.00109271	1.46127	0.467876	-2.24474	NA	-3.84149	0.231619	-7.05435	2.08991e-07	-2.38834	0.535822
FBgn0037409	Osi24	0	0	0.04	0.16	0.13	0.08	0.15	0.13	0.21	0.09	0.11	0.13	0.06	0.06	0.11	0	0	0	0.0133333	0.023094	0.123333	0.0404145	0.163333	0.0416333	0.11	0.02	0.0766667	0.0288675	0	0	3.63921	0.0196436	3.8924	0.00553002	0.243685	0.847596	-0.478487	0.707775	3.02288	0.0944294	-3.87689	0.0592927	-4.43982	0.0480001	-4.96292	0.00639971	-1.3633	NA
FBgn0037410	Osi2	2.35	2.03	1.61	0	0	0	0.07	0	0.11	1	0.57	0.76	0.03	0.15	0.05	0	0	0	1.99667	0.371124	0	0	0.06	0.0556776	0.776667	0.215484	0.0766667	0.064291	0	0	-8.73758	3.66307e-11	-4.75487	4.62791e-11	3.93239	NA	7.5816	9.04555e-07	-1.30891	0.0112335	-2.96422	0.275627	-6.3648	3.807e-05	NA	NA	-7.67019	3.25965e-09
FBgn0037411	Osi3	0.06	0	0	0	0	0	0	0	0.02	0	0	0	0	0	0	0	0	0	0.02	0.034641	0	0	0.00666667	0.011547	0	0	0	0	0	0	-1.85923	NA	-0.90478	NA	0.91595	NA	NA	NA	-0.00648908	NA	NA	NA	NA	NA	NA	NA	-0.770376	NA
FBgn0037412	Osi4	0	0.13	0	0	0	0	0	0.02	0	0	0.07	0	0	0	0	0	0	0	0.0433333	0.0750555	0	0	0.00666667	0.011547	0.0233333	0.0404145	0	0	0	0	-3.20234	0.480373	-2.30834	0.589535	0.860698	NA	2.9561	NA	-0.380207	NA	NA	NA	-1.74178	NA	NA	NA	-2.12826	0.6182
FBgn0037413	Osi5	0.17	0	0.04	0	0.03	0	0.04	0	0	0	0	0	0	0	0	0	0	0	0.07	0.0888819	0.01	0.0173205	0.0133333	0.023094	0	0	0	0	0	0	-2.29765	0.534929	-2.36119	0.497332	-0.100077	NA	1.03066	NA	-1.41084	NA	NA	NA	NA	NA	0.221156	NA	-2.16451	0.597298
FBgn0027527	Osi6	5.62	4.14	4.43	0	0	0	0.12	0.01	0.03	0	0	0	0	0	0	0	0	0	4.73	0.784283	0	0	0.0533333	0.0585947	0	0	0	0	0	0	-10.2293	2.88817e-16	-6.23433	6.67043e-28	4.01522	NA	NA	NA	-8.38404	1.99404e-11	NA	NA	NA	NA	NA	NA	-9.16853	1.58468e-13
FBgn0037414	Osi7	0	0.02	0	0	0.01	0.01	0	0.01	0.02	0	0	0	0	0	0	0	0	0	0.00666667	0.011547	0.00666667	0.0057735	0.01	0.01	0	0	0	0	0	0	0.649561	NA	1.19777	NA	0.496154	NA	0.239915	NA	0.73977	NA	NA	NA	NA	NA	-0.598443	NA	-0.0549905	NA
FBgn0037415	Osi8	0	0.04	0.03	0	0	0	0	0	0.04	0.21	0.62	0	0	0	0	0	0	0	0.0233333	0.0208167	0	0	0.0133333	0.023094	0.276667	0.315331	0	0	0	0	-1.99094	NA	-0.311366	NA	1.63147	NA	5.7544	0.0254472	3.64885	0.062006	NA	NA	-4.52154	0.091625	NA	NA	-0.928198	NA
FBgn0037416	Osi9	0	0	0	0	0.03	0	0.07	0.04	0.02	0.17	0.07	0.13	0	0	0	0	0	0	0	0	0.01	0.0173205	0.0433333	0.0251661	0.123333	0.0503322	0	0	0	0	1.51859	NA	3.28827	0.323413	1.69073	NA	3.15178	0.219015	4.5724	NA	NA	NA	-3.63319	0.200594	-0.482796	NA	NA	NA
FBgn0037417	Osi10	0.24	0.22	0.35	0.02	0.08	0.03	0	0	0	0	0	0	0	0	0	0	0	0	0.27	0.07	0.0433333	0.0321455	0	0	0	0	0	0	0	0	-2.18227	0.0598848	-6.18761	0.000263526	-4.01073	NA	-1.90915	NA	-4.27843	0.0133898	NA	NA	NA	NA	-2.74282	0.395204	-5.06729	0.00208785
FBgn0037418	Osi11	0.03	0.08	0.16	0	0	0	0	0	0	0	0	0	0	0	0.03	0	0	0	0.09	0.0655744	0	0	0	0	0	0	0.01	0.0173205	0	0	-3.91315	0.207816	-3.98271	0.175729	NA	NA	NA	NA	-2.07589	NA	0.0175678	NA	NA	NA	NA	NA	-2.85771	0.303576
FBgn0037419	Osi12	0.02	0.03	0.04	0.02	0	0	0	0.02	0	0	0	0	0	0	0	0	0	0	0.03	0.01	0.00666667	0.011547	0.00666667	0.011547	0	0	0	0	0	0	-1.99095	0.54451	-2.05917	0.511279	-0.100077	NA	1.03155	NA	-1.11028	NA	NA	NA	NA	NA	0.197654	NA	-1.90057	NA
FBgn0037420	CG15597	0	0.15	0.06	0	0	0	0	0	0	0	0	0	0	0	0	0	0	0	0.07	0.0754983	0	0	0	0	0	0	0	0	0	0	-2.61961	NA	-2.68922	NA	NA	NA	NA	NA	-0.772778	NA	NA	NA	NA	NA	NA	NA	-1.52116	NA
FBgn0037421	CG15594	0.05	0.2	0.12	0	0	0	0	0	0	0	0	0	0	0	0	0	0	0	0.123333	0.0750555	0	0	0	0	0	0	0	0	0	0	-4.71577	0.0575558	-4.78371	0.0425497	NA	NA	NA	NA	-2.87061	NA	NA	NA	NA	NA	NA	NA	-3.65427	0.106775
FBgn0037422	Osi13	0	0	0.02	0	0	0.02	0.02	0	0.05	0	0	0	0	0	0	0	0	0	0.00666667	0.011547	0.00666667	0.011547	0.0233333	0.0251661	0	0	0	0	0	0	-0.131773	NA	1.63803	NA	1.73194	NA	1.03155	NA	0.750812	NA	NA	NA	NA	NA	0.201355	NA	-0.0322883	NA
FBgn0040279	Osi14	0.04	0	0	0	0.02	0	0	0	0	0	0	0	0	0	0	0	0	0	0.0133333	0.023094	0.00666667	0.011547	0	0	0	0	0	0	0	0	-0.121501	NA	-1.1503	NA	-1.06186	NA	1.03155	NA	0.761084	NA	NA	NA	NA	NA	0.212545	NA	-0.010826	NA
FBgn0037424	Osi15	0	0	0	0.9	0.59	0.87	7.16	7.15	8.98	0	0	0	0.03	0	0	0	0	0	0	0	0.786667	0.170978	7.76333	1.05368	0	0	0.01	0.0173205	0	0	7.51932	1.32183e-07	10.6697	4.35757e-18	3.12973	2.46998e-30	-5.65208	0.000176825	NA	NA	0.0155832	NA	NA	NA	-6.47548	7.18017e-06	NA	NA
FBgn0051561	Osi16	0	0	0	0	0	0	0	0	0.02	0	0	0	0	0	0	0	0	0	0	0	0	0	0.00666667	0.011547	0	0	0	0	0	0	NA	NA	0.7743	NA	0.861696	NA	NA	NA	NA	NA	NA	NA	NA	NA	NA	NA	NA	NA
FBgn0267690	CG46026	0.04	0.05	0.05	0.04	0	0	0	0	0	0	0	0	0	0	0	0	0	0	0.0466667	0.0057735	0.0133333	0.023094	0	0	0	0	0	0	0	0	-1.14778	0.664733	-3.85171	0.193785	-2.76411	NA	-0.682165	NA	-1.94116	NA	NA	NA	NA	NA	-1.52705	NA	-2.73324	0.321456
FBgn0051560	CG31560	0	0	0	0	0	0	0	0	0	0	0	0	0	0	0	0	0	0	0	0	0	0	0	0	0	0	0	0	0	0	NA	NA	NA	NA	NA	NA	NA	NA	NA	NA	NA	NA	NA	NA	NA	NA	NA	NA
FBgn0037427	Osi17	0.02	0	0.01	0	0	0	0	0	0	0	0.06	0	0.02	0	0.01	0	0.04	0	0.01	0.01	0	0	0	0	0.02	0.034641	0.01	0.01	0.0133333	0.023094	-2.44832	NA	-2.51243	NA	NA	NA	3.77914	NA	1.18935	NA	-0.443046	NA	-1.52473	0.710431	2.20881	NA	-0.350313	0.912584
FBgn0037428	Osi18	0.03	0	0.03	0	0	0	0	0	0.1	0	0	0	0	0	0	0	0	0	0.02	0.0173205	0	0	0.0333333	0.057735	0	0	0	0	0	0	-1.89154	NA	1.0935	0.766121	2.9421	NA	NA	NA	-0.0514011	NA	NA	NA	NA	NA	NA	NA	-0.828954	NA
FBgn0037429	Osi19	0.21	0.52	0.1	0.06	0.02	0.05	0.71	0.8	0.34	2.12	6.92	17.61	0	0.04	0	0	0	0	0.276667	0.217792	0.0433333	0.0208167	0.616667	0.24379	8.88333	7.92944	0.0133333	0.023094	0	0	-2.24869	0.133967	1.53709	0.0872139	3.75938	0.000733262	7.49377	5.75687e-17	5.09775	1.0042e-11	0.0127833	NA	-9.49461	1.67702e-07	-2.08433	NA	-4.40636	0.0281917
FBgn0037430	Osi20	0.12	0.15	0.29	0	0.04	0	0.07	0	0.2	0	0	0.14	0	0	0	0	0	0	0.186667	0.0907377	0.0133333	0.023094	0.09	0.101489	0.0466667	0.080829	0	0	0	0	-3.37075	0.0984063	-0.665877	0.682381	2.69525	0.461773	1.30521	NA	-2.29488	0.233807	NA	NA	-1.73511	NA	-0.480388	NA	-4.03722	0.0482208
FBgn0037431	CG17917	4.3	4.57	6.17	0.89	0.81	0.49	1.57	1.16	1.16	0	0.3	0	0	0.19	0.11	0	0	0	5.01333	1.01076	0.73	0.21166	1.29667	0.236714	0.1	0.173205	0.1	0.0953939	0	0	-2.28426	2.6297e-07	-1.60585	1.96111e-05	0.647854	0.39773	-2.92941	0.0712422	-5.29852	3.56311e-06	-2.18515	NA	-2.36692	NA	-5.46064	0.000956772	-7.84557	8.53379e-10
FBgn0037432	CG10298	4.01	4.12	4.92	0.89	0.51	0.72	1.7	1.76	1.34	0.16	0.28	0.25	0	0.06	0.05	0.22	0.2	0	4.35	0.496689	0.706667	0.190351	1.6	0.227156	0.23	0.06245	0.0366667	0.0321455	0.14	0.121655	-2.14081	1.5977e-06	-1.09898	0.00205955	1.00955	0.105675	-1.88858	0.135722	-4.16396	1.14002e-06	1.68863	0.524243	-1.03678	0.63316	-3.04242	0.0206873	-5.34727	1.46945e-08
FBgn0037433	CG17919	2.42	3.3	4.66	7.31	4.78	4.89	11.99	13.1	9.56	0.63	0.4	1.42	1.92	2.32	2.34	0	0	0.6	3.46	1.12854	5.66	1.43	11.55	1.81055	0.816667	0.535008	2.19333	0.236925	0.2	0.34641	1.21613	0.000760767	2.09504	2.29989e-13	0.853144	0.00224967	-3.19822	4.44597e-08	-2.11592	0.00117491	-3.32321	0.000155596	-2.1104	0.202868	-5.0837	1.12638e-11	-4.01925	7.48932e-06
FBgn0261789	SmD2	273.14	238.62	217.14	225.25	245.51	196.78	217.19	216.28	190.72	198.11	189.89	194.21	237.35	232.15	225.52	239.73	237.54	227.52	242.967	28.2519	222.513	24.48	208.063	15.0267	194.07	4.11179	231.673	5.92939	234.93	6.51	0.359518	0.0259351	0.114466	0.488788	-0.278674	0.0175909	-0.475219	2.2596e-07	-0.262796	0.0712357	-0.127314	0.0365357	0.0397664	0.609081	-0.486644	2.64344e-08	-0.224873	0.102656
FBgn0037435	CG18048	27.31	25.96	25.21	26.98	25.69	28.47	21.83	19.1	20.24	24.25	24.03	24.82	38.55	40.92	36.9	44.82	42.88	44.96	26.16	1.06419	27.0467	1.3912	20.39	1.37117	24.3667	0.407717	38.79	2.02072	44.22	1.16258	0.543839	0.000199551	-0.0177028	0.911323	-0.594725	7.24517e-07	-0.434543	0.000893903	-0.0390846	0.790883	0.0453207	0.641869	0.628952	1.50794e-09	0.141756	0.208002	0.584665	7.07346e-08
FBgn0037436	Hr83	2.84	1	1.38	0	0.11	0.16	0.38	0.17	0.22	0.14	0.12	0	0.05	0	0	0	0	0.08	1.74	0.971391	0.09	0.0818535	0.256667	0.109697	0.0866667	0.0757188	0.0166667	0.0288675	0.0266667	0.046188	-3.75102	0.000110429	-2.45344	0.00111791	1.28128	0.517362	-0.200223	NA	-4.07677	0.00190641	0.991349	NA	-1.52097	0.680501	-1.77917	0.573348	-5.66442	8.28399e-05
FBgn0267698	Pak	54.82	70.65	73.18	54.61	48.36	51.61	60.99	59.12	60.79	74.85	77.4	81.01	83.64	81.83	85.31	95.37	94.36	101.57	66.2167	9.95054	51.5267	3.12583	60.3	1.02679	77.7533	3.09516	83.5933	1.74047	97.1	3.90393	0.143151	0.299484	0.217462	0.0657494	0.0421888	0.768427	0.311048	0.000401642	0.304651	0.00690127	0.0723245	0.134269	0.0887128	0.161095	0.346873	2.57643e-05	0.386109	0.000538313
FBgn0261641	CG42724	98.84	109.55	112.08	56.56	54.74	43.52	56.13	58.74	47.97	61.64	69.39	61.19	44.62	47.26	47.82	49.72	52.2	51.9	106.823	7.02854	51.6067	7.06213	54.28	5.61828	64.0733	4.60986	46.5667	1.70896	51.2733	1.35356	-0.55372	3.15455e-06	-0.628949	1.09535e-08	-0.107393	0.561888	0.0352415	0.772665	-0.667079	2.06726e-15	-0.00789494	0.91267	-0.558688	1.66827e-17	-0.573402	1.27606e-08	-1.22945	3.49895e-70
FBgn0037439	CG10286	65.92	72.33	67.85	119.07	139.87	105.53	108.73	100.23	84.16	46.82	49.91	48.8	33.11	36.88	36.43	30.99	26.93	27.27	68.7	3.28845	121.49	17.2974	97.7067	12.4778	48.51	1.56528	35.4733	2.05904	28.3967	2.25232	1.31603	3.23518e-27	0.852844	3.94929e-12	-0.49591	0.00040035	-1.60169	3.62838e-58	-0.433799	1.14937e-06	-0.46418	1.42329e-07	-1.00568	9.10387e-31	-2.65913	6.8893e-137	-1.44347	2.1515e-53
FBgn0037440	CRAT	23.3	26.49	22.33	21.77	20.3	20.53	21.65	23.31	19.92	30.58	29.4	28.01	23.96	22.86	24.1	25.83	25.29	25.56	24.04	2.17649	20.8667	0.790717	21.6267	1.69512	29.33	1.28643	23.64	0.679117	25.56	0.27	0.292619	0.0354927	0.192764	0.187387	-0.132457	0.369822	0.212705	0.0528825	0.356756	0.00462094	-0.0339876	0.693392	-0.436682	2.04362e-06	-0.275011	0.00388962	-0.0823821	0.475935
FBgn0260766	CG42564	4.39	5.71	4.4	0.59	0.61	0.46	1	0.97	0.85	0.44	0.12	0.55	0.2	0.24	0.19	0.05	0.25	0.04	4.83333	0.759232	0.553333	0.0814453	0.94	0.0793725	0.37	0.223383	0.21	0.0264575	0.113333	0.118462	-2.63525	1.99315e-17	-2.01708	1.14442e-13	0.58556	0.261907	-0.914434	0.293103	-3.75177	2.49792e-13	-1.24989	0.323107	-2.08743	0.137298	-3.10052	0.00174288	-5.94768	9.33672e-17
FBgn0027514	CG1024	40.63	38.23	38.73	14.87	15.11	12.57	16.18	15.43	14.81	28.84	31.36	31.76	27.81	27.05	28.44	36.93	35.85	39.65	39.1967	1.26623	14.1833	1.40233	15.4733	0.686027	30.6533	1.58308	27.7667	0.696012	37.4767	1.95809	-0.975066	5.19483e-14	-0.9984	3.5809e-18	-0.0566236	0.756674	0.832286	3.91362e-14	-0.291289	0.0114524	0.291342	3.16511e-05	0.0598169	0.547453	0.839047	2.40114e-16	-0.236538	0.0216129
FBgn0260645	CG42537	5.48	1.04	1.35	1	0	0	0.13	0	0	0	0	0	0.84	0	0	0	0	1.14	2.62333	2.4788	0.333333	0.57735	0.0433333	0.0750555	0	0	0.28	0.484974	0.38	0.658179	-2.60532	0.105495	-6.0989	0.000193769	-3.54731	0.425904	-2.43318	NA	-5.14802	0.00254443	0.349455	0.917071	2.23016	0.632749	-0.228537	0.945942	-2.73984	0.0588757
FBgn0010282	TfIIFalpha	115.7	105.5	110.04	74.59	79.43	80.59	82.64	80.31	83.9	154	172.19	148.76	165.73	149.88	159	165.61	142.92	167.36	110.413	5.11024	78.2033	3.18254	82.2833	1.82138	158.317	12.297	158.203	7.95498	158.63	13.6334	-0.00269725	0.98537	-0.0812422	0.501478	-0.112401	0.316609	0.736519	1.0796e-17	0.584661	1.27422e-07	-0.138958	0.0464652	-0.231767	0.00172023	0.45343	7.50561e-08	0.349156	0.00109941
FBgn0037442	godzilla	68.45	79.88	87.46	45.65	36.02	40.55	49.8	48.26	53.54	67.63	71.28	74.99	83.61	78.81	81.51	84.13	78.69	86.09	78.5967	9.56976	40.74	4.81781	50.5333	2.71531	71.3	3.68004	81.31	2.40624	82.97	3.83395	-0.444321	0.00136477	-0.285902	0.00938771	0.126257	0.446877	0.524485	2.50734e-06	-0.0701317	0.508238	-0.113308	0.0318144	-0.0119527	0.87604	0.458316	2.68572e-05	-0.0894589	0.387103
FBgn0037443	Dmtn	77.2	95.02	106.25	35.44	31.4	32.89	47.61	45.15	48.63	54.19	59.9	55.95	35.38	35.61	37.19	29.62	27.7	29.35	92.8233	14.649	33.2433	2.04305	47.13	1.78897	56.68	2.92416	36.06	0.985343	28.89	1.03937	-0.976376	6.97618e-15	-0.625021	7.05252e-08	0.319238	0.000806825	0.488879	3.7035e-08	-0.638224	2.53743e-08	-0.462302	9.4919e-16	-1.20588	3.95226e-79	-0.768743	4.85419e-18	-1.84998	2.92834e-57
FBgn0264495	gpp	51.91	60.38	67.66	56.75	44.12	50.54	66.34	62.16	69.28	86.13	90.76	82.45	66.74	71.15	72.22	98.96	91.63	94.66	59.9833	7.88249	50.47	6.31529	65.9267	3.57795	86.4467	4.16404	70.0367	2.90469	95.0833	3.68329	0.255493	0.0804281	0.487848	4.2216e-06	0.200276	0.164936	0.494242	3.33434e-06	0.599714	1.71395e-09	0.296282	8.37589e-10	-0.0981727	0.0407931	0.345111	0.00124672	0.496954	4.96074e-07
FBgn0037445	CG9727	12.43	20.52	20.18	34.82	31.75	30.91	34.65	37.07	35.03	42.39	43.9	41.88	17.09	20.41	19.66	25.62	25.32	25.87	17.71	4.57577	32.4933	2.05826	35.5833	1.30144	42.7233	1.05044	19.0533	1.74116	25.6033	0.275379	1.38478	6.47715e-16	1.3646	9.06949e-16	-0.0519041	0.70171	0.115227	0.163688	1.34924	3.72032e-16	0.280755	0.000534148	-0.974861	2.72576e-78	-0.910336	9.721e-34	0.369807	0.0401744
FBgn0037446	Zif	153.59	157.1	149.09	33.78	36.44	25.06	37.56	39.54	30.29	43.73	44.74	46.55	54.33	50.78	55.58	69.7	75.55	71.65	153.26	4.01518	31.76	5.95285	35.7967	4.87059	45.0067	1.42879	53.5633	2.49015	72.3	2.97867	-1.78071	2.43305e-33	-1.75473	1.86074e-39	-0.00658934	0.983589	0.226036	0.136269	-1.70363	3.74692e-67	0.283705	6.17409e-05	0.449759	6.63997e-07	0.624049	4.75615e-06	-1.25822	9.82546e-48
FBgn0037447	Neurochondrin	0.1	0.09	0.19	14.73	14.58	12.13	27.23	25.58	24.51	1.49	1.88	2.39	1.03	0.94	0.83	0	0	0.02	0.126667	0.0550757	13.8133	1.45974	25.7733	1.37027	1.92	0.451331	0.933333	0.100167	0.00666667	0.011547	7.20634	1.05695e-106	7.95412	1.70208e-143	0.717952	6.69963e-12	-3.15579	1.05058e-55	3.9334	3.45126e-16	-6.4624	8.69683e-07	-7.5878	4.53798e-09	-10.7737	4.44944e-19	-3.63535	0.0350254
FBgn0037448	CG15186	0.03	0.11	0.03	1.97	2.05	1.92	3.16	3.5	4.24	0.18	0.11	0.12	0.2	0.14	0.12	0	0	0.02	0.0566667	0.046188	1.98	0.0655744	3.63333	0.552208	0.136667	0.0378594	0.153333	0.0416333	0.00666667	0.011547	5.71048	1.36815e-34	6.44028	7.28824e-47	0.691608	0.00015471	-4.12332	3.26551e-20	1.38978	0.179465	-4.55758	0.00242224	-4.50495	0.00864916	-8.66783	1.6641e-12	-3.13898	0.113188
FBgn0037449	CG15185	4.4	4.46	3.47	0	0	0	0.24	0.36	0.43	0	0	0	0	0	0	0	0	0	4.11	0.555068	0	0	0.343333	0.0960902	0	0	0	0	0	0	-9.45319	1.197e-13	-3.21883	4.78579e-15	6.18882	0.000581052	NA	NA	-7.60685	2.15106e-09	NA	NA	NA	NA	NA	NA	-8.37972	2.72092e-11
FBgn0053202	dpr11	1.48	1.34	1.91	0.01	0.02	0	0.03	0.01	0.04	0	0	0	0	0	0	0	0	0	1.57667	0.297041	0.01	0.01	0.0266667	0.0152753	0	0	0	0	0	0	-7.07228	3.08831e-18	-5.53778	6.67105e-27	1.44518	0.604023	-0.852249	NA	-8.09431	1.02895e-10	NA	NA	NA	NA	-1.70015	NA	-8.8953	8.84568e-13
FBgn0046873	Pif2	0	0	0.04	0	0	0	0	0	0	0	0	0	0	0	0	0	0	0	0.0133333	0.023094	0	0	0	0	0	0	0	0	0	0	-1.07462	NA	-1.14165	NA	NA	NA	NA	NA	0.769743	NA	NA	NA	NA	NA	NA	NA	0.00753749	NA
FBgn0037454	CG1137	0.08	0.11	0.24	0	0	0	0	0	0	0	0	0	0	0	0	0	0	0	0.143333	0.085049	0	0	0	0	0	0	0	0	0	0	-4.81877	0.0454989	-4.88779	0.032743	NA	NA	NA	NA	-2.98109	NA	NA	NA	NA	NA	NA	NA	-3.76707	0.0867443
FBgn0037455	CG2336	0	0.04	0	0	0	0	0	0	0.02	0	0	0	0	0	0	0	0	0	0.0133333	0.023094	0	0	0.00666667	0.011547	0	0	0	0	0	0	-1.0905	NA	-0.19574	NA	0.861696	NA	NA	NA	0.753868	NA	NA	NA	NA	NA	NA	NA	-0.025938	NA
FBgn0037456	CG1138	0.03	0.03	0.03	0	0	0	0	0	0	0	0	0	0	0	0	0	0	0	0.03	0	0	0	0	0	0	0	0	0	0	0	-2.58172	NA	-2.64836	NA	NA	NA	NA	NA	-0.735815	NA	NA	NA	NA	NA	NA	NA	-1.51555	NA
FBgn0051482	CG31482	0	0	0.05	0	0	0	0	0	0	0	0	0	0	0	0	0	0	0	0.0166667	0.0288675	0	0	0	0	0	0	0	0	0	0	-1.06894	NA	-1.13596	NA	NA	NA	NA	NA	0.775426	NA	NA	NA	NA	NA	NA	NA	0.0197309	NA
FBgn0250846	glob2	0.05	0.04	0.05	0	0	0	0	0	0	0	0	0	0	0	0	0	0	0	0.0466667	0.0057735	0	0	0	0	0	0	0	0	0	0	-3.12775	NA	-3.19423	NA	NA	NA	NA	NA	-1.28259	NA	NA	NA	NA	NA	NA	NA	-2.06003	0.518984
FBgn0037460	sowi	0	0	0	0	0	0	0	0	0	0	0	0	0	0	0	0	0	0	0	0	0	0	0	0	0	0	0	0	0	0	NA	NA	NA	NA	NA	NA	NA	NA	NA	NA	NA	NA	NA	NA	NA	NA	NA	NA
FBgn0037461	CG15177	0.04	0.05	0.07	0	0	0	0	0	0.03	0	0	0	0	0	0	0	0	0	0.0533333	0.0152753	0	0	0.01	0.0173205	0	0	0	0	0	0	-2.95226	NA	-2.05405	0.514378	0.867962	NA	NA	NA	-1.11149	NA	NA	NA	NA	NA	NA	NA	-1.88314	NA
FBgn0037462	sunz	0	0.27	0.04	0	0	0	0	0.03	0.03	0	0	0	0	0	0	0	0	0	0.103333	0.145717	0	0	0.02	0.0173205	0	0	0	0	0	0	-3.70554	0.356983	-1.94685	0.488033	1.7017	NA	NA	NA	-1.85403	NA	NA	NA	NA	NA	NA	NA	-2.61863	0.491288
FBgn0051286	CG31286	0.17	0.18	0.22	0	0	0	0	0.08	0.05	0	0	0	0	0	0	0	0	0	0.19	0.0264575	0	0	0.0433333	0.0404145	0	0	0	0	0	0	-5.6722	0.00314715	-1.59326	0.235259	4.03371	NA	NA	NA	-3.82909	0.0409507	NA	NA	NA	NA	NA	NA	-4.61816	0.00898866
FBgn0026565	Ass	1.59	0.66	1.1	0.65	0.34	0.45	0.39	0.26	0.63	0	0	0	0	0.12	0.03	0	0	0	1.11667	0.465224	0.48	0.157162	0.426667	0.187705	0	0	0.05	0.06245	0	0	-0.761684	0.235065	-1.07108	0.0975497	-0.344221	0.741056	-5.1573	0.00153413	-6.0609	2.15072e-05	-2.27735	NA	NA	NA	-5.98628	0.000105584	-6.84023	1.07864e-06
FBgn0010355	Taf1	46.69	48.52	49.68	31.16	31.88	25.85	37.93	37.13	32.68	53.09	54.44	49.21	47.13	47.59	50.16	69.47	64.74	64.32	48.2967	1.50746	29.63	3.29331	35.9133	2.82857	52.2467	2.71508	48.2933	1.63286	66.1767	2.85983	-0.210468	0.0626794	-0.081838	0.449646	0.0960134	0.533747	0.541554	1.04666e-09	0.182438	0.0309511	0.309567	2.95027e-10	0.104322	0.0830514	0.595189	2.24193e-12	0.283334	4.22782e-05
FBgn0026566	CG1307	222.59	192.48	201.2	166.29	167.03	135.87	178.22	173.23	150.07	167.19	169.25	173.2	224.86	205.91	216.32	273.44	296.12	274.09	205.423	15.4929	156.397	17.7805	167.173	15.0206	169.88	3.05413	215.697	9.49037	281.217	12.9108	0.0957618	0.536316	0.0433024	0.779564	-0.0853414	0.61787	-0.159058	0.10703	-0.211477	0.0856943	0.235033	0.000150463	0.491795	1.47768e-12	0.281732	0.00342169	0.27786	0.0186565
FBgn0262801	twr	181.96	165.25	175.23	141.16	155.9	129.48	173.46	190.46	142.41	176.46	177.05	174.39	184.7	172.97	176.24	195.69	188.35	204.92	174.147	8.40751	142.18	13.2395	168.777	24.365	175.967	1.39694	177.97	6.05334	196.32	8.30295	0.199142	0.126255	0.297751	0.0511659	0.065624	0.765157	0.0294876	0.771684	0.0800391	0.475824	-0.0011151	0.988477	-0.0755132	0.285931	-0.0986333	0.256632	-0.000593632	0.995301
FBgn0024912	agt	136.66	143.1	157.5	22.92	18.24	19.85	23.07	21.57	19.87	18.79	22.43	19.26	32.78	36.99	35.69	38.41	31.86	36.09	145.753	10.6704	20.3367	2.37765	21.5033	1.60104	20.16	1.97987	35.1533	2.1557	35.4533	3.32109	-2.34219	9.09983e-74	-2.41536	6.59285e-125	-0.104534	0.633449	-0.291542	0.0929245	-2.78009	8.63531e-130	-0.125336	0.287144	0.582181	4.44399e-05	0.239108	0.127779	-2.2024	6.66309e-101
FBgn0002522	lab	0.48	0.9	0.67	0.02	0.14	0.14	0.08	0.05	0.05	0.04	0	0	0	0	0	0	0	0	0.683333	0.210317	0.1	0.069282	0.06	0.0173205	0.0133333	0.023094	0	0	0	0	-2.19864	0.00895806	-3.23057	5.72749e-06	-1.03266	0.561227	-2.7331	0.235584	-5.105	0.000277419	NA	NA	-1.62944	NA	-4.4094	0.0583107	-6.73944	1.1768e-06
FBgn0000552	Edg84A	0	0.08	0.06	0	0	0	0	0	0	0	0	0	0.07	0	0.06	0	0	0	0.0466667	0.0416333	0	0	0	0	0	0	0.0433333	0.0378594	0	0	-1.96345	NA	-2.03314	NA	NA	NA	NA	NA	-0.121447	NA	-0.809038	NA	NA	NA	NA	NA	-0.869128	NA
FBgn0004777	Ccp84Ag	0	0.04	0.07	0.09	0.12	0.35	0.37	0.44	0.07	0	0	0	0.04	0.04	0	0	0	0	0.0366667	0.0351188	0.186667	0.142244	0.293333	0.196554	0	0	0.0266667	0.023094	0	0	2.90118	0.0931812	3.34765	0.0320782	0.417982	0.827675	-3.42923	0.157884	-0.669444	NA	-0.922359	NA	NA	NA	-4.24549	0.0562593	-1.45041	NA
FBgn0004778	Ccp84Af	0	0	0	0	0	0	0	0	0	0	0	0	0	0	0	0	0	0	0	0	0	0	0	0	0	0	0	0	0	0	NA	NA	NA	NA	NA	NA	NA	NA	NA	NA	NA	NA	NA	NA	NA	NA	NA	NA
FBgn0004779	Ccp84Ae	0	0	0.05	0	0.03	0.07	0	0.04	0.07	0	0	0	0	0	0	0	0	0	0.0166667	0.0288675	0.0333333	0.0351188	0.0366667	0.0351188	0	0	0	0	0	0	1.30873	NA	1.23555	NA	-0.115271	NA	-0.379711	NA	0.778136	NA	NA	NA	NA	NA	-1.17484	NA	0.0255858	NA
FBgn0004780	Ccp84Ad	0.16	0	0	0.05	0	0	0	0	0.16	0	0	0	0	0	0	0	0	0	0.0533333	0.092376	0.0166667	0.0288675	0.0533333	0.092376	0	0	0	0	0	0	-1.58948	NA	0.122992	0.976992	1.66108	NA	1.03155	NA	-0.698103	NA	NA	NA	NA	NA	0.233621	NA	-1.4349	NA
FBgn0004781	Ccp84Ac	0.4	0.14	0.24	0	0	0	0	0	0	0	0	0	0	0	0	0	0	0	0.26	0.131149	0	0	0	0	0	0	0	0	0	0	-5.33892	0.0122736	-5.40457	0.00797718	NA	NA	NA	NA	-3.49395	0.0927016	NA	NA	NA	NA	NA	NA	-4.26195	0.0313366
FBgn0004782	Ccp84Ab	0	0	0.18	0	0.14	0.03	0.04	0.1	0.3	0	0	0	0	0	0	0	0	0	0.06	0.103923	0.0566667	0.0737111	0.146667	0.136137	0	0	0	0	0	0	0.480692	0.89216	1.72235	0.448667	1.19799	0.676988	-1.24866	NA	-0.931304	NA	NA	NA	NA	NA	-2.05248	NA	-1.70572	NA
FBgn0004783	Ccp84Aa	0.1	0.19	0	0	0	0.03	0	0	0	0	0.14	0	0	0	0	0	0	0	0.0966667	0.0950438	0.01	0.0173205	0	0	0.0466667	0.080829	0	0	0	0	-2.45036	0.484121	-3.48211	0.38864	-1.06186	NA	1.99333	NA	-0.593015	NA	NA	NA	-1.71116	NA	0.230956	NA	-2.30863	0.556833
FBgn0051481	pb	0.17	0.06	0.29	0	0	0	0	0	0	0.03	0.03	0.05	0	0.01	0.01	0.02	0	0	0.173333	0.115036	0	0	0	0	0.0366667	0.011547	0.00666667	0.0057735	0.00666667	0.011547	-6.61592	0.000113066	-6.68377	6.10001e-05	NA	NA	4.46783	NA	-2.34524	0.071698	0.0613301	NA	-2.29897	0.408519	2.11126	NA	-4.61784	0.00410663
FBgn0004054	zen2	0.04	0.26	0.28	0	0	0	0	0	0	0	0	0	0.04	0	0	0	0	0	0.193333	0.133167	0	0	0	0	0	0	0.0133333	0.023094	0	0	-4.65692	0.0725993	-4.72619	0.0558339	NA	NA	NA	NA	-2.81637	NA	0.0256831	NA	NA	NA	NA	NA	-3.58718	0.134928
FBgn0085326	CG34297	1.73	1.86	2.42	0	0	0	0.13	0	0.07	0	0	0	0	0	0	0	0	0	2.00333	0.366652	0	0	0.0666667	0.0650641	0	0	0	0	0	0	-7.75462	2.98131e-08	-4.63868	3.48816e-07	3.10499	NA	NA	NA	-5.91212	2.03572e-05	NA	NA	NA	NA	NA	NA	-6.66778	8.78607e-07
FBgn0004053	zen	25.3	27.89	25.74	5.56	5.02	6.39	6.22	5.2	5.29	1.47	3.01	3.21	1.8	1.8	1.44	1.11	0.75	0.85	26.31	1.38589	5.65667	0.690097	5.57	0.564712	2.56333	0.95212	1.68	0.207846	0.903333	0.185831	-1.71773	1.58026e-22	-1.89621	1.09999e-37	-0.211183	0.476321	-1.4458	4.01698e-05	-3.31756	5.41724e-42	-1.02202	0.023006	-1.71303	0.00163746	-3.19571	1.06447e-19	-5.00896	4.52756e-80
FBgn0000166	bcd	9.26	16.9	15.33	19.22	19.68	22.77	13.16	16.44	17.66	96.6	96.78	93.95	78.24	96.24	91.24	136.13	138.44	144.41	13.83	4.03484	20.5567	1.93055	15.7533	2.32726	95.7767	1.5845	88.5733	9.29157	139.66	4.27269	1.08556	2.73811e-07	0.549191	0.0175682	-0.569414	0.000824105	1.93717	2.44254e-78	2.87267	2.71798e-56	0.511655	1.34106e-10	0.309236	5.58943e-09	2.19566	8.94481e-113	3.17613	8.01576e-66
FBgn0000071	Ama	0.02	0.03	0.05	0	0.21	0.03	0.12	0.02	0.1	0	0	0	0	0	0	0	0	0	0.0333333	0.0152753	0.08	0.113578	0.08	0.052915	0	0	0	0	0	0	1.69705	0.426981	1.53349	0.387738	-0.205226	0.948881	-2.75042	NA	-1.21022	NA	NA	NA	NA	NA	-3.58111	0.280868	-1.99877	NA
FBgn0000439	Dfd	0.07	0.07	0.09	0.03	0.03	0.01	0.11	0.05	0.09	0	0.04	0.06	0	0	0	0	0	0	0.0766667	0.011547	0.0233333	0.011547	0.0833333	0.0305505	0.0333333	0.0305505	0	0	0	0	-1.13234	0.438212	0.459967	0.679212	1.56212	0.328179	0.0457771	NA	-1.26858	0.45859	NA	NA	-2.73744	0.518984	-2.69356	0.406394	-3.92546	0.0561719
FBgn0003339	Scr	0	0.06	0.03	0	0	0	0.01	0.01	0	0	0	0	0	0	0	0	0	0	0.03	0.03	0	0	0.00666667	0.0057735	0	0	0	0	0	0	-4.09767	0.252118	-1.6618	0.502636	2.41982	NA	NA	NA	-2.25187	NA	NA	NA	NA	NA	NA	NA	-3.05526	0.370469
FBgn0001077	ftz	0	0.03	0	0	0	0	0	0	0	0	0	0	0	0	0	0	0	0	0.01	0.0173205	0	0	0	0	0	0	0	0	0	0	-1.09726	NA	-1.16428	NA	NA	NA	NA	NA	0.74711	NA	NA	NA	NA	NA	NA	NA	-0.0399413	NA
FBgn0260642	Antp	0.15	0.32	0.34	3.02	3.83	3.65	5.26	4.15	6.96	0.41	0.49	0.22	0.07	0.11	0.09	0	0	0.03	0.27	0.104403	3.5	0.425323	5.45667	1.41529	0.373333	0.138684	0.09	0.02	0.01	0.0173205	4.20798	2.41903e-50	4.69885	3.97307e-54	0.454188	0.0765693	-3.47066	2.62081e-26	0.577554	0.340257	-3.18586	0.0389959	-5.29795	5.36883e-05	-8.80484	2.26473e-17	-4.73399	0.000213984
FBgn0024289	Sodh-1	0.03	0.12	0.09	0.77	4.41	6.01	4.48	6.03	8.07	0.42	0.25	0.45	0.51	0.14	0.26	0	0	0	0.08	0.0458258	3.73	2.68537	6.19333	1.80056	0.373333	0.107858	0.303333	0.188768	0	0	6.06602	3.18103e-12	6.64454	1.442e-24	0.533244	0.700759	-3.64243	5.96327e-06	2.27747	0.0559824	-4.7495	0.0082555	-5.12586	0.00762206	-8.79912	3.6268e-10	-2.85628	0.305123
FBgn0026563	CG1979	0.03	0	0.07	0.01	0.1	0.11	0.03	0	0.16	0	0.03	0	0	0	0.01	0	0	0	0.0333333	0.0351188	0.0733333	0.0550757	0.0633333	0.085049	0.01	0.0173205	0.00333333	0.0057735	0	0	1.5533	0.340131	1.1476	0.576865	-0.457817	0.868228	-2.79701	0.206689	-1.38794	NA	-0.0057316	NA	-1.75553	NA	-4.5996	0.0368373	-3.14921	0.34262
FBgn0019828	dj	0	0.04	0	0	0.02	0	0	0	0	0	0	0	0	0	0	0	0	0	0.0133333	0.023094	0.00666667	0.011547	0	0	0	0	0	0	0	0	-0.123502	NA	-1.16678	NA	-1.07633	NA	1.01707	NA	0.744608	NA	NA	NA	NA	NA	0.195502	NA	-0.0298694	NA
FBgn0037463	djl	0	0	0.2	0	0	0	0	0.03	0.07	0	0	0	0	0	0	0	0	0	0.0666667	0.11547	0	0	0.0333333	0.0351188	0	0	0	0	0	0	-3.3473	0.459482	-0.654806	0.845431	2.66042	NA	NA	NA	-1.52314	NA	NA	NA	NA	NA	NA	NA	-2.31137	0.58969
FBgn0037464	CG1988	0.12	0.31	0.34	0	0.03	0.07	0.04	0.05	0.06	0.06	0	0	0.04	0.02	0.06	0	0	0	0.256667	0.119304	0.0333333	0.0351188	0.05	0.01	0.02	0.034641	0.04	0.02	0	0	-2.36477	0.063662	-1.97407	0.0445887	0.3554	0.904043	-1.01853	NA	-3.54748	0.0313715	-2.50626	NA	-1.76617	NA	-2.82962	0.461389	-5.32186	0.00124218
FBgn0037465	CG1105	30.09	40.96	38.08	24.82	24.44	25.55	31.79	32.8	34.55	31.35	29.42	32.59	25.91	26.64	29.46	33.89	32.08	34.16	36.3767	5.63163	24.9367	0.564122	33.0467	1.39644	31.12	1.59747	27.3367	1.87474	33.3767	1.13103	-0.0397036	0.804228	0.214595	0.127822	0.2214	0.0525282	0.0346957	0.792472	-0.153074	0.275979	0.145103	0.10273	-0.127907	0.24321	-0.145604	0.146828	-0.288824	0.0241564
FBgn0037466	CG1965	30.44	40.93	42.38	23.09	23.75	23.87	26.1	26.42	26.82	30.71	30.73	28.96	33.54	33.27	34.38	32.74	30.46	34.31	37.9167	6.51545	23.57	0.42	26.4467	0.36074	30.1333	1.01619	33.73	0.578878	32.5033	1.93588	-0.179788	0.207837	-0.165566	0.234325	-0.0186914	0.90487	0.0751787	0.456913	-0.25533	0.0555658	-0.193571	0.0021367	-0.124731	0.138642	-0.101302	0.248566	-0.386786	0.00349009
FBgn0037467	Ufl1	36.54	41.41	43.5	21.62	22.25	19.91	25.32	25.93	22.12	19.82	19.94	16.05	11.67	12.42	13.15	14.67	13.63	12.46	40.4833	3.57133	21.26	1.21083	24.4567	2.04647	18.6033	2.21207	12.4133	0.740023	13.5867	1.10564	-0.429893	2.50823e-05	-0.378497	0.000887071	0.0186928	0.923734	-0.463328	0.000133105	-1.04318	2.81891e-17	-0.0180423	0.895329	-0.697064	2.24391e-07	-1.21471	1.29791e-29	-1.74697	3.65455e-56
FBgn0037468	CG1943	642.29	818.37	775.1	296.99	277.36	396.51	368.17	348.62	474.5	980.57	1092.29	973.76	1231.48	1177.76	1179.18	1096.24	996.08	1116.91	745.253	91.756	323.62	63.8831	397.097	67.7422	1015.54	66.5546	1196.14	30.6136	1069.74	64.6261	-0.695006	7.79421e-05	-0.556946	0.000262277	0.104088	0.7232	1.36219	3.78706e-23	0.518161	1.71339e-07	-0.305647	1.8336e-10	-0.159541	0.00350817	1.15194	1.22011e-16	0.353879	0.000267614
FBgn0010774	Ref1	555.28	643.32	615.16	317.15	386.6	328.42	367.24	374.04	350.86	356.25	386.86	356.8	628.47	564.72	573.29	610.19	626.15	635.99	604.587	44.9623	344.057	37.272	364.047	11.9154	366.637	17.5161	588.827	34.5985	624.11	13.0204	-0.315743	0.00536686	-0.383871	1.42018e-05	-0.101739	0.465931	-0.187444	0.0369866	-0.651702	3.791e-17	-0.0611705	0.302586	0.531973	7.20477e-31	0.294198	0.000255725	-0.123367	0.0762639
FBgn0037469	Dpck	31.64	30.08	31.03	32.15	31.11	26.48	32.95	27.93	26.71	38.28	35.94	46	61.86	56.61	57.16	47.23	45.94	42.36	30.9167	0.786151	29.9133	3.01848	29.1967	3.30722	40.0733	5.26431	58.5433	2.88545	45.1767	2.52314	0.444703	0.00242325	0.258996	0.0867598	-0.21837	0.193496	0.135038	0.413704	0.431409	0.00536402	-0.523998	1.92319e-08	-0.0551212	0.736745	0.0275601	0.841055	0.370813	0.00260634
FBgn0037470	Tailor	94.46	96.05	86.48	71.56	74.86	68.67	70.77	69.54	68.46	73.37	76.12	63.98	133.07	129.38	134.18	132.13	125.14	131.99	92.33	5.12825	71.6967	3.09726	69.59	1.15581	71.1567	6.36546	132.21	2.51291	129.753	3.99588	0.128532	0.313576	-0.064812	0.605773	-0.226974	0.00268105	-0.28698	0.00191536	-0.308065	0.0121841	-0.170504	9.53116e-05	0.627257	3.17139e-19	0.290358	1.40761e-06	0.318716	0.000530148
FBgn0003884	alphaTub84B	1182.38	1534.04	1287.34	1386.29	1615.21	1460.51	1617.02	1586.4	1463.56	1332.42	1370.39	1343.42	1584.05	1541.84	1518.23	2273.85	2432.03	2328.46	1334.59	180.528	1487.34	116.794	1555.66	81.217	1348.74	19.5367	1548.04	33.3451	2344.78	80.3429	0.655118	1.57847e-07	0.568928	1.43271e-06	-0.119322	0.321124	-0.421175	1.43812e-09	0.0858443	0.429769	0.454182	8.4194e-23	0.563844	6.51062e-35	0.091533	0.23649	0.645473	5.1622e-10
FBgn0040670	e(y)2b	11.63	15.63	11.59	1.38	1.29	1.19	5.23	4.09	5.7	0.56	0.51	0.32	0.95	0.25	0.58	0	0.58	0.99	12.95	2.32103	1.28667	0.0950438	5.00667	0.827909	0.463333	0.126623	0.593333	0.35019	0.523333	0.497427	-2.83394	1.89604e-18	-1.02109	0.000227105	1.77745	2.49134e-06	-1.78171	0.0674966	-4.74132	9.23984e-14	-0.304996	0.835306	-0.0130991	0.994163	-1.87008	0.0759383	-4.7889	4.73748e-16
FBgn0261238	Alh	25.49	30.67	33.75	23.78	23.58	24.93	26.28	28.07	29.66	71.81	80.59	76.68	49.78	51.51	52.74	86.97	93.97	93.4	29.97	4.17425	24.0967	0.728583	28.0033	1.69099	76.36	4.39874	51.3433	1.48702	91.4467	3.88737	0.19012	0.132915	0.255222	0.04057	0.0319197	0.855147	1.38155	6.65844e-68	1.42151	1.25833e-42	0.686956	1.0928e-40	0.025684	0.72058	1.35628	7.76385e-71	1.44244	3.72592e-42
FBgn0014863	Mlp84B	1.65	2.2	1.96	25.53	27.74	27.94	39.84	34.74	43.14	1.95	2.13	2.6	1.77	1.79	1.96	0.16	0.16	0.13	1.93667	0.275741	27.07	1.33742	39.24	4.23202	2.22667	0.335609	1.84	0.104403	0.15	0.0173205	4.31138	1.96657e-179	4.69408	9.78789e-203	0.349161	0.00623553	-3.91404	1.04121e-112	0.256537	0.379204	-3.80058	7.42265e-15	-4.15339	1.52455e-14	-8.11174	2.62093e-89	-3.89648	6.11673e-15
FBgn0037472	CG10098	13.96	20.85	20.75	21.43	19.81	17.6	22.49	23.52	18.6	48.36	48.81	49.25	63.39	56.59	60.42	81.25	83.21	84.39	18.52	3.94939	19.6133	1.92256	21.5367	2.59485	48.8067	0.445009	60.1333	3.40905	82.95	1.58606	0.588467	0.000877721	0.573418	0.00181075	-0.0465746	0.850474	1.03622	1.48086e-21	1.47459	1.21745e-21	0.318604	1.15913e-06	0.532313	2.07034e-12	1.51644	3.06024e-57	2.00064	3.8379e-41
FBgn0037473	CG10068	16.53	23.51	23.4	21.56	19.54	24.33	21.03	22.66	24.86	32.75	34.01	32.91	45.84	44.9	47.65	37.17	35.45	38.18	21.1467	3.99853	21.81	2.40477	22.85	1.92206	33.2233	0.685954	46.13	1.39775	36.9333	1.3803	0.554169	0.00214802	0.467369	0.0047017	-0.119641	0.587966	0.323338	0.024026	0.727456	9.86041e-07	-0.462914	1.10314e-11	-0.0809265	0.439455	0.190243	0.168403	0.639781	1.34185e-05
FBgn0051248	CG31248	16.56	18.36	20.67	4.91	26.64	11.77	21.65	9.05	17.32	1.88	1.62	2.64	0.25	0.26	0.05	0	0	0	18.53	2.06027	14.44	11.1083	16.0067	6.40185	2.04667	0.530031	0.186667	0.118462	0	0	0.131526	0.804612	0.133291	0.69194	-0.034175	0.982305	-3.10985	1.29216e-08	-3.15419	2.3893e-24	-3.49303	0.147039	-7.01582	9.1823e-07	-10.1643	1.84587e-10	-10.1399	8.61765e-17
FBgn0051493	CG31493	0.88	1.06	0.68	0	0	0	0	0	0	0	0	0	0	0	0	0	0	0	0.873333	0.190088	0	0	0	0	0	0	0	0	0	0	-6.9202	7.91004e-06	-6.9865	3.51203e-06	NA	NA	NA	NA	-5.07313	0.000899409	NA	NA	NA	NA	NA	NA	-5.83747	7.48563e-05
FBgn0037475	Fer1	0.42	0.53	0.18	0.02	0.03	0	0.02	0.04	0.03	0	0	0	0	0	0	0	0	0.04	0.376667	0.178979	0.0166667	0.0152753	0.03	0.01	0	0	0	0	0.0133333	0.023094	-3.92881	0.00574718	-3.22542	0.00603767	0.672378	NA	-0.393136	NA	-4.4883	0.00952014	1.93664	NA	0.186841	NA	-0.260463	NA	-4.30014	0.00765354
FBgn0037477	CG14610	0.16	0	0	0.14	0.05	0	0.13	0.12	0.27	0	0	0	0.09	0.18	0.08	0	0.66	0.27	0.0533333	0.092376	0.0633333	0.070946	0.173333	0.083865	0	0	0.116667	0.0550757	0.31	0.331813	0.588515	0.886782	1.98962	0.421138	1.3934	0.648682	-0.540191	NA	-0.0872038	NA	1.13169	0.585187	2.36513	0.537612	1.74294	0.491304	2.24487	0.408685
FBgn0037478	CG2656	43.91	47.84	45.07	39.54	44.05	31.62	43.58	41.31	32.03	23.76	20.93	22.63	25.21	27.94	26.22	29.53	30.88	37.9	45.6067	2.01922	38.4033	6.29247	38.9733	6.11928	22.44	1.42454	26.4567	1.3803	32.77	4.4937	0.244898	0.122559	0.117389	0.484862	-0.159796	0.506269	-1.05272	3.22185e-11	-0.956827	1.09293e-12	0.169086	0.226907	0.31677	0.0676334	-0.78848	5.36628e-07	-0.642712	1.87259e-06
FBgn0250732	gfzf	55.79	81.9	77.75	32.54	37.03	29.91	37.54	33.78	30.11	50.74	55.26	54.17	47.89	48.28	53.46	64.27	63.1	65.58	71.8133	14.0309	33.16	3.60026	33.81	3.71509	53.39	2.35879	49.8767	3.10938	64.3167	1.24066	-0.611524	4.22623e-05	-0.734115	1.18197e-06	-0.155021	0.317504	0.407998	4.84117e-06	-0.35243	0.0107733	0.222325	7.83501e-05	0.0354992	0.57534	0.391373	1.8833e-06	-0.323131	0.0197899
FBgn0011020	Sas-4	45.82	45.14	40.32	13.28	12.59	11.22	14.51	11.73	13.99	34.03	37.04	32.72	55.52	53.56	55.98	74.06	70.78	71.8	43.76	2.99847	12.3633	1.04854	13.41	1.47797	34.5967	2.21505	55.02	1.28515	72.2133	1.67861	-1.33246	9.6024e-23	-1.36558	1.11853e-22	-0.0662854	0.741901	1.20818	3.00643e-32	-0.273107	0.030049	0.247388	2.54733e-07	0.822621	4.35438e-35	1.98165	3.6897e-129	0.549328	7.23424e-08
FBgn0037481	MAGE	42.94	43.27	40.07	29.44	31.52	27.92	32.25	31.25	29.45	47.86	55.26	57.68	83.36	80.43	82.73	80.97	84.3	85.89	42.0933	1.76001	29.6267	1.80724	30.9833	1.41892	53.6	5.11613	82.1733	1.54228	83.72	2.51076	-0.0129434	0.93618	-0.0987997	0.487745	-0.119784	0.418285	0.571199	2.84408e-06	0.410618	0.00232228	-0.119741	0.0962343	0.413347	0.000109919	0.931772	1.15446e-23	0.819164	1.59112e-15
FBgn0002306	sas	12.74	14.42	13.46	1.18	1.22	1.01	3.05	3.14	3.62	0.12	0.1	0.14	0.19	0.14	0.12	0.02	0.05	0	13.54	0.842852	1.13667	0.111505	3.27	0.306431	0.12	0.02	0.15	0.0360555	0.0233333	0.0251661	-3.07722	5.7295e-116	-1.70034	1.08665e-39	1.34257	2.29829e-17	-3.56907	1.45761e-13	-6.79907	3.45481e-66	-3.27052	0.00450396	-2.90232	0.0450277	-6.73069	5.38741e-14	-9.93613	1.83683e-31
FBgn0037482	CG10055	41.07	50.85	49.64	34.29	42.53	38.33	39.16	41.61	41.99	72.67	70.32	68.23	94.92	88.69	93.23	102.97	96.34	106.05	47.1867	5.33163	38.3833	4.12026	40.92	1.536	70.4067	2.22127	92.28	3.22182	101.787	4.96198	0.203655	0.134551	0.145653	0.218313	-0.0921588	0.584302	0.59545	3.38145e-09	0.650373	5.71848e-11	-0.00108489	0.987283	0.297279	1.12117e-06	0.840853	3.63992e-20	0.9421	9.44919e-25
FBgn0086372	lap	20.75	32.48	31.69	86.13	80.23	98.5	71.32	77.18	82.73	122.21	129.15	120.04	84.25	87.94	87.54	83.73	70.91	88.82	28.3067	6.55618	88.2867	9.32398	77.0767	5.7057	123.8	4.75858	86.5767	2.02485	81.1533	9.22884	2.15265	3.31543e-36	1.80221	2.59285e-29	-0.383197	0.00549736	0.203478	0.0675994	2.20596	5.34424e-50	-0.236943	0.00190588	-0.843185	1.58038e-31	-0.691914	3.44798e-09	1.35555	4.3601e-16
FBgn0037483	CG14609	0.25	0.31	0.43	0.02	0.04	0.07	0.05	0.07	0.09	0	0.1	0.17	0.02	0.02	0	0	0.06	0	0.33	0.0916515	0.0433333	0.0251661	0.07	0.02	0.09	0.08544	0.0133333	0.011547	0.02	0.034641	-2.35758	0.0188166	-1.86843	0.0291074	0.453868	0.841166	0.669848	0.746911	-1.90626	0.0995423	0.0101288	NA	-2.78169	0.323274	-2.12918	0.396905	-4.61544	0.0021417
FBgn0250845	CG1288	0.02	0.22	0.16	0	0	0	0.04	0	0	0	0	0	0	0	0	0	0	0	0.133333	0.102632	0	0	0.0133333	0.023094	0	0	0	0	0	0	-4.64153	0.079169	-3.54877	0.131698	1.05571	NA	NA	NA	-2.79816	NA	NA	NA	NA	NA	NA	NA	-3.58018	0.144983
FBgn0037485	CG14606	0.22	0.23	0.12	0.33	0	0	0.46	0.13	0.36	0	0	0	0	0	0	0	0	0	0.19	0.0608276	0.11	0.190526	0.316667	0.169214	0	0	0	0	0	0	-0.313664	0.879072	1.07531	0.215705	1.36328	0.558796	-3.45903	0.347497	-3.90391	0.0382377	NA	NA	NA	NA	-4.30258	0.231214	-4.68865	0.00875621
FBgn0037486	CG14605	0.23	0.03	0.17	0	0.02	0	0	0	0	0	0	0	0	0	0	0	0	0	0.143333	0.102632	0.00666667	0.011547	0	0	0	0	0	0	0	0	-4.05451	0.0691218	-5.09469	0.0267927	-1.07568	NA	1.01773	NA	-3.18619	0.173419	NA	NA	NA	NA	0.187688	NA	-3.96744	0.0779638
FBgn0037487	thw	0.14	0.18	0.27	0	0	0	0	0	0	0	0	0	0	0	0	0	0	0	0.196667	0.0665833	0	0	0	0	0	0	0	0	0	0	-6.96322	6.70949e-06	-7.03137	2.99587e-06	NA	NA	NA	NA	-5.12235	0.000808674	NA	NA	NA	NA	NA	NA	-5.92575	6.11213e-05
FBgn0037488	CG14607	0.18	0.55	0.12	0	0	0.03	0	0	0.03	0	0	0.12	0	0	0	0	0	0	0.283333	0.232881	0.01	0.0173205	0.01	0.0173205	0.04	0.069282	0	0	0	0	-4.08082	0.0227567	-4.2056	0.0152374	-0.235745	NA	1.09055	NA	-3.1273	0.0820052	NA	NA	-1.7399	NA	-0.694767	NA	-4.87074	0.00837062
FBgn0037489	CG1234	59.53	65.6	58.74	87.62	91.2	81.27	68.46	64.57	59.52	62.47	59.75	64.6	45.4	47.9	49.12	52.8	48.69	53.79	61.29	3.75341	86.6967	5.02898	64.1833	4.48253	62.2733	2.43097	47.4733	1.89635	51.76	2.70439	0.995484	2.46786e-21	0.411078	0.00020044	-0.617338	2.03645e-13	-0.758577	2.86204e-24	0.0896868	0.389419	-0.0171771	0.818061	-0.497183	2.81788e-12	-1.30749	1.45946e-84	-0.413149	2.23841e-06
FBgn0037490	CG10053	49.11	45.3	44.44	17.88	18.77	15.13	17.14	15.84	13.84	15.15	17.49	15.76	19.17	19.42	20.57	13.93	15.39	13.56	46.2833	2.48544	17.26	1.89755	15.6067	1.66233	16.1333	1.21385	19.72	0.746659	14.2933	0.967592	-0.933053	3.27977e-09	-1.22846	1.8578e-15	-0.328644	0.0754478	-0.372067	0.0550613	-1.45281	1.15114e-18	-0.623956	2.16364e-05	-0.421205	0.0457138	-0.846486	1.18938e-06	-1.88164	1.48526e-35
FBgn0037491	CG1227	31.83	37.14	32.47	28.56	30.87	28.15	26.89	27.9	27.19	47.08	52.83	52.38	72.43	67.22	70.2	65.77	65.07	67.69	33.8133	2.8987	29.1933	1.46644	27.3267	0.518684	50.7633	3.19779	69.95	2.61398	66.1767	1.35652	0.28594	0.0337076	0.0405749	0.779398	-0.279259	0.0112698	0.515988	1.29538e-06	0.65418	3.91265e-08	-0.224367	0.000901512	0.150621	0.123581	0.614456	1.4463e-12	0.800316	5.74963e-16
FBgn0037492	CG10050	15.89	19.72	18.25	16.98	18.84	16.98	17.1	16.12	17.57	13.21	13.34	19.14	28.09	26.26	27.68	30.68	29.59	30.24	17.9533	1.93216	17.6	1.07387	16.93	0.739797	15.23	3.38678	27.3433	0.96033	30.17	0.548361	0.472104	0.00030818	0.265277	0.0425693	-0.240736	0.043243	-0.50431	0.00287934	-0.17954	0.341583	-0.00228916	0.981998	0.767593	1.39915e-06	0.211326	0.0324652	0.582075	5.11968e-08
FBgn0011282	Obp84a	2.29	1.31	1.55	1.15	0.8	1.6	1.61	1.57	0.85	1.37	0.48	0.43	0.31	0.49	0.3	0.14	0	0.28	1.71667	0.510816	1.18333	0.40104	1.34333	0.427707	0.76	0.528867	0.366667	0.106927	0.14	0.14	-0.065545	0.923603	-0.0290692	0.96293	0.00545913	0.996816	-0.811224	0.367464	-1.02033	0.176792	-1.58526	0.278947	-2.7888	0.0584971	-3.61351	0.00120368	-3.75397	0.000218483
FBgn0001112	Gld	1.34	1.44	1.52	0.44	0.44	1.05	0.33	0.2	0.82	0.62	0.63	0.24	0.27	0.27	0.16	0.13	0.09	0.17	1.43333	0.090185	0.643333	0.352184	0.45	0.326956	0.496667	0.222336	0.233333	0.0635085	0.13	0.04	-0.63832	0.178843	-1.30748	0.0139723	-0.708707	0.425485	-0.635161	0.357951	-1.39587	0.000984773	-0.957924	0.236783	-2.16583	0.00823746	-2.85392	6.0755e-05	-3.57025	5.79902e-13
FBgn0028400	Syt4	0.17	0.15	0.4	3.93	2.69	3.81	0.02	0.03	0.09	2.9	1.15	0.6	5.25	6.25	5.5	0	0	0	0.24	0.138924	3.47667	0.68391	0.0466667	0.0378594	1.55	1.20104	5.66667	0.520416	0	0	4.34637	1.22202e-31	-2.06865	0.0356756	-6.43797	1.71846e-44	-1.42096	0.00171603	2.78192	1.91383e-05	-10.3073	6.65853e-17	-8.54136	7.31712e-10	-10.0275	4.10233e-16	-5.76843	0.000225913
FBgn0267337	rn	0.19	0.32	0.59	0	0.01	0	0.01	0.01	0.01	0	0	0	0.01	0	0.01	0.02	0	0	0.366667	0.204042	0.00333333	0.0057735	0.01	0	0	0	0.00666667	0.0057735	0.00666667	0.011547	-6.10291	4.88525e-06	-4.99373	1.10051e-06	1.16163	NA	0.298457	NA	-6.09149	2.86186e-05	-0.193767	NA	0.187348	NA	0.433681	NA	-5.91412	3.22392e-05
FBgn0045843	RacGAP84C	0.11	0.17	0.29	0	0	0	0	0	0	0	0	0	0	0.03	0	0	0	0	0.19	0.0916515	0	0	0	0	0	0	0.01	0.0173205	0	0	-5.2555	0.014504	-5.32418	0.00940576	NA	NA	NA	NA	-3.41631	0.101746	0.000983292	NA	NA	NA	NA	NA	-4.20176	0.0339683
FBgn0260713	CG42544	0	0	0	0	0	0	0	0	0	0	0	0	0	0	0	0	0	0	0	0	0	0	0	0	0	0	0	0	0	0	NA	NA	NA	NA	NA	NA	NA	NA	NA	NA	NA	NA	NA	NA	NA	NA	NA	NA
FBgn0037498	CG10029	0.03	0	0.03	0	0	0	0	0	0.02	0	0	0	0	0	0	0	0	0	0.02	0.0173205	0	0	0.00666667	0.011547	0	0	0	0	0	0	-1.89403	NA	-0.999542	NA	0.861696	NA	NA	NA	-0.0538911	NA	NA	NA	NA	NA	NA	NA	-0.834146	NA
FBgn0265423	CG44335	0	0	0.04	0	0	0	0	0	0	0	0	0	0	0	0	0	0	0	0.0133333	0.023094	0	0	0	0	0	0	0	0	0	0	-1.07331	NA	-1.14034	NA	NA	NA	NA	NA	0.771051	NA	NA	NA	NA	NA	NA	NA	0.0103349	NA
FBgn0051496	CG31496	0.97	0.75	0.93	0	0.02	0	0	0	0.05	0	0	0	0	0	0	0	0	0	0.883333	0.117189	0.00666667	0.011547	0.0166667	0.0288675	0	0	0	0	0	0	-6.08157	4.81359e-05	-5.28305	8.71723e-05	0.669699	NA	1.03155	NA	-5.19921	0.000507317	NA	NA	NA	NA	0.214994	NA	-5.96843	3.58795e-05
FBgn0051501	nxf4	1.81	1.79	1.26	0.03	0.1	0.02	0	0	0	0	0	0	0	0	0	0	0	0	1.62	0.311929	0.05	0.043589	0	0	0	0	0	0	0	0	-4.42135	1.83295e-07	-8.09367	2.51382e-09	-3.64477	NA	-1.54345	NA	-6.18054	6.37066e-06	NA	NA	NA	NA	-2.36396	0.507633	-6.95069	2.18948e-07
FBgn0262982	CG43290	1.72	2.42	3.27	0	0	0	0.97	0.72	0.88	0	0.18	0	0	0	0	0	0	0	2.47	0.776209	0	0	0.856667	0.126623	0.06	0.103923	0	0	0	0	-7.59716	1.11825e-07	-1.16786	0.0403549	6.39945	0.000178474	2.9551	NA	-4.79412	0.00068283	NA	NA	-1.68992	NA	NA	NA	-6.4911	3.10313e-06
FBgn0037500	CG17944	0.05	0.07	0.05	0.04	0.47	0.14	0	0.04	0	0	0	0	0.06	0	0	0	0	0	0.0566667	0.011547	0.216667	0.225019	0.0133333	0.023094	0	0	0.02	0.034641	0	0	2.47488	0.174389	-1.6601	NA	-4.16519	0.0998612	-3.0211	0.279888	-0.710877	NA	0.0394071	NA	NA	NA	-3.82017	0.136294	-1.46264	NA
FBgn0004175	Mst84Dd	0	0	0	0	0.37	0.35	0	0.08	0	0	0	0	0	0	0	0	0	0	0	0	0.24	0.208087	0.0266667	0.046188	0	0	0	0	0	0	4.13675	0.227228	0.840283	NA	-3.3393	NA	-2.19626	NA	NA	NA	NA	NA	NA	NA	-2.92928	0.425769	NA	NA
FBgn0004174	Mst84Dc	0	0.15	0.11	0.31	0.07	0	0	0	0	0	0	0	0	0.14	0	0	0	0	0.0866667	0.0776745	0.126667	0.162583	0	0	0	0	0.0466667	0.080829	0	0	1.07736	0.741065	-1.98261	NA	-3.08994	NA	-1.00493	NA	-0.0709195	NA	0.125679	NA	NA	NA	-1.72085	NA	-0.739781	NA
FBgn0004173	Mst84Db	0	0.13	0	0	0	0	0	0	0	0	0	0	0	0	0	0	0	0	0.0433333	0.0750555	0	0	0	0	0	0	0	0	0	0	-1.01625	NA	-1.08327	NA	NA	NA	NA	NA	0.828118	NA	NA	NA	NA	NA	NA	NA	0.138815	NA
FBgn0004172	Mst84Da	0	0	0	0	0	0	0	0	0	0	0	0	0	0	0	0	0	0	0	0	0	0	0	0	0	0	0	0	0	0	NA	NA	NA	NA	NA	NA	NA	NA	NA	NA	NA	NA	NA	NA	NA	NA	NA	NA
FBgn0015770	MstProx	0	0.03	0	0.01	0	0	0	0	0	0	0	0	0	0	0	0	0	0	0.01	0.0173205	0.00333333	0.0057735	0	0	0	0	0	0	0	0	-1.23856	NA	-2.26953	NA	-1.06186	NA	1.03155	NA	-0.345318	NA	NA	NA	NA	NA	0.187154	NA	-1.14111	NA
FBgn0261502	CG42650	0	0	0.05	0	0	0	0	0	0	0	0	0	0	0	0	0	0	0	0.0166667	0.0288675	0	0	0	0	0	0	0	0	0	0	-1.06704	NA	-1.13407	NA	NA	NA	NA	NA	0.777321	NA	NA	NA	NA	NA	NA	NA	0.0238231	NA
FBgn0037501	Ir84a	0.04	0	0.07	0	0	0.01	0	0	0	0.06	0	0	0	0	0	0	0	0	0.0366667	0.0351188	0.00333333	0.0057735	0	0	0.02	0.034641	0	0	0	0	-2.48455	0.474069	-3.50985	0.381151	-1.06186	NA	1.99333	NA	-0.652877	NA	NA	NA	-1.74663	NA	0.195487	NA	-2.40152	0.534005
FBgn0037502	wa-cup	0	0	0	0	0	0	0	0	0	0	0	0	0	0	0	0	0	0	0	0	0	0	0	0	0	0	0	0	0	0	NA	NA	NA	NA	NA	NA	NA	NA	NA	NA	NA	NA	NA	NA	NA	NA	NA	NA
FBgn0037503	CG14598	0.96	0.43	0.47	0	0.02	0	0	0	0	0	0	0	0	0	0	0	0	0	0.62	0.295127	0.00666667	0.011547	0	0	0	0	0	0	0	0	-5.87018	0.000208861	-6.89722	1.11401e-05	-1.06186	NA	1.03155	NA	-4.98514	0.0018125	NA	NA	NA	NA	0.207963	NA	-5.75764	0.000202799
FBgn0037504	CG1142	121.4	125.25	111.71	82.42	103.99	85.57	82.57	77.58	71.68	63.98	78.22	65.86	73.42	72.25	74.92	67.45	64.79	66.91	119.453	6.97675	90.66	11.6511	77.2767	5.45133	69.3533	7.73608	73.53	1.33839	66.3833	1.40603	0.0946687	0.543202	-0.285875	0.0246226	-0.414578	0.00136574	-0.6634	1.21342e-07	-0.716693	2.84893e-08	-0.291546	4.33853e-05	-0.300868	0.00590352	-1.01448	2.98163e-21	-1.01929	6.49952e-24
FBgn0015569	alpha-Est10	10.72	13.58	14.16	7.2	7.56	7.87	8.83	8.83	9.35	11.11	11.15	11.12	5.7	6.19	5.8	25.16	24.18	27.17	12.82	1.84163	7.54333	0.335311	9.00333	0.300222	11.1267	0.0208167	5.89667	0.258908	25.5033	1.52428	-0.258926	0.11454	-0.156477	0.31394	0.0690097	0.743009	0.277492	0.0829798	-0.13117	0.406909	1.97137	6.42078e-86	0.96556	3.52353e-16	1.19053	2.26975e-25	0.827367	1.41324e-10
FBgn0261508	CG42656	0	0	0	0	0	0.13	0	0	0.13	0	0	0	0	0	0	0	0	0	0	0	0.0433333	0.0750555	0.0433333	0.0750555	0	0	0	0	0	0	0.991887	NA	0.924864	NA	-0.100077	NA	1.03155	NA	NA	NA	NA	NA	NA	NA	0.433009	NA	NA	NA
FBgn0015577	alpha-Est9	0.03	0.16	0.16	4.64	7.97	6.32	8.89	6.92	8.89	8.24	7.79	10.88	1.96	1.81	1.58	0.07	0.04	0.04	0.116667	0.0750555	6.31	1.66502	8.23333	1.13738	8.97	1.66934	1.78333	0.191398	0.05	0.0173205	6.24023	2.88072e-59	6.46945	2.68489e-83	0.196649	0.532004	0.219853	0.369572	6.3084	1.16025e-70	-5.32023	1.83005e-15	-7.73514	3.99517e-34	-7.56273	1.26698e-31	-1.42585	0.237428
FBgn0037506	Mics1	0	0	0.03	0.04	0	0	0.02	0.02	0.05	0.32	0.21	0	0	0.09	0	0.05	0	0	0.01	0.0173205	0.0133333	0.023094	0.03	0.0173205	0.176667	0.162583	0.03	0.0519615	0.0166667	0.0288675	0.988953	NA	1.97723	0.521834	1.00419	NA	3.46044	0.161252	4.24935	0.0592972	-0.584063	NA	-3.30084	0.188015	0.0384858	NA	0.932958	NA
FBgn0015576	alpha-Est8	0	0	0.01	2.67	1.83	2.03	3.01	2.62	3.02	3.93	3.89	4.27	0.55	0.2	0.22	0	0	0	0.00333333	0.0057735	2.17667	0.438786	2.88333	0.228108	4.03	0.208806	0.323333	0.196554	0	0	9.15631	2.68193e-13	9.41019	2.43327e-14	0.224808	0.474605	0.606751	0.0199538	9.6126	5.92119e-15	-5.94575	8.81239e-05	-9.66303	6.89972e-15	-9.10966	3.06706e-13	-0.054514	NA
FBgn0017456	Ubc84D	0.06	0.08	0.12	0.05	0.04	0.09	0.26	0.05	0.13	0	0	0	0	0	0	0	0	0	0.0866667	0.0305505	0.06	0.0264575	0.146667	0.105987	0	0	0	0	0	0	-0.0502128	0.984084	1.06498	0.578394	1.08967	0.698063	-0.875794	NA	-1.06887	NA	NA	NA	NA	NA	-1.66149	NA	-1.81232	NA
FBgn0015575	alpha-Est7	0.09	0.14	0.21	1.82	3.44	3.66	5.35	6.4	5.6	3.39	2.91	2.49	0.34	0.47	0.28	0	0	0	0.146667	0.0602771	2.97333	1.00485	5.78333	0.548483	2.93	0.450333	0.363333	0.0971253	0	0	4.82211	7.00392e-23	5.61678	4.73076e-50	0.76606	0.0179543	-0.301147	0.445821	4.36722	3.0831e-21	-5.68819	0.000145959	-8.80287	4.79847e-12	-9.15544	5.51217e-13	-4.42861	0.0183342
FBgn0015574	alpha-Est6	0.31	0.41	0.12	0.1	0.07	0.03	0.17	0.04	0.13	0	0	0	0	0	0	0	0	0	0.28	0.147309	0.0666667	0.0351188	0.113333	0.0665833	0	0	0	0	0	0	-1.59291	0.152536	-0.948368	0.359266	0.610101	0.746775	-2.68704	NA	-4.41799	0.0124414	NA	NA	NA	NA	-3.52397	0.17585	-5.20117	0.00226578
FBgn0015831	Rtnl2	0.16	1.54	1.13	0.75	1.27	0.66	0.8	0.69	0.69	0.38	0.32	0.38	0.3	0.23	0.25	0.34	0	0.07	0.943333	0.708684	0.893333	0.329292	0.726667	0.0635085	0.36	0.034641	0.26	0.0360555	0.136667	0.179536	0.447305	0.616604	0.00234053	0.997725	-0.483251	0.543212	-1.59277	0.0932997	-1.29359	0.232593	-0.978717	0.515593	-1.56635	0.357702	-3.16974	0.00349953	-2.85134	0.0295982
FBgn0003885	alphaTub84D	292.36	298.75	259.81	231.16	247.44	221.87	236.83	247.71	232.09	111.73	118.15	107.12	100.18	104.55	99.73	104.01	108.76	102.55	283.64	20.8832	233.49	12.9433	238.877	8.0086	112.333	5.5397	101.487	2.66245	105.107	3.247	0.211449	0.100118	0.0949	0.469602	-0.150142	0.0897134	-1.33331	2.45488e-85	-1.27069	5.13736e-31	-0.0972425	0.120569	-0.334604	1.98304e-07	-1.71909	3.99244e-161	-1.60569	1.24146e-57
FBgn0261393	alpha-Est5	5.11	5.88	6.31	19.54	25.67	23.47	39.41	40.27	33.5	34.81	35.63	33.56	18.37	16.67	19.73	18.49	23.39	21.29	5.76667	0.607975	22.8933	3.10542	37.7267	3.68557	34.6667	1.04242	18.2567	1.53314	21.0567	2.45832	2.49068	1.33034e-55	3.05844	4.54371e-116	0.534478	0.000483396	0.318103	0.0197069	2.65918	4.47725e-105	0.0540339	0.702129	-0.961565	1.86643e-15	-0.691476	3.89509e-06	1.69514	2.03326e-28
FBgn0015572	alpha-Est4	3.47	5.34	4.55	3.08	1.92	2.85	3.83	3.52	3.4	0.82	0.9	0.95	1.11	1.05	0.95	0.04	0.22	0	4.45333	0.93874	2.61667	0.614193	3.58333	0.221886	0.89	0.0655744	1.03667	0.080829	0.0866667	0.117189	-0.258847	0.425277	0.0391929	0.88297	0.26741	0.46865	-1.80796	2.61814e-05	-2.21654	1.01903e-09	-4.10877	5.69279e-06	-3.92619	0.000252131	-5.8918	1.78037e-12	-6.28013	2.94626e-15
FBgn0015571	alpha-Est3	14.42	15.6	15.55	22.26	17.14	18.27	21.18	20.93	19.72	25.1	23.99	25.98	32.1	29.36	31.01	30.05	30.93	28.2	15.19	0.667308	19.2233	2.68984	20.61	0.780833	25.0233	0.997213	30.8233	1.3795	29.7267	1.39343	0.838002	6.88402e-08	0.787836	2.19424e-12	-0.0818848	0.703551	0.0990091	0.548486	0.786821	2.73259e-11	-0.204023	0.0209141	0.0130918	0.922193	0.0605187	0.686814	0.794734	3.59448e-14
FBgn0015570	alpha-Est2	0.65	0.85	0.46	1.92	3.33	2.6	3.21	2.67	4.05	0.76	0.37	0.27	0.28	0.41	0.23	0	0	0.06	0.653333	0.195021	2.61667	0.705148	3.31	0.695414	0.466667	0.258908	0.306667	0.0929157	0.02	0.034641	2.50697	2.30956e-11	2.7013	1.707e-15	0.153856	0.741329	-2.74363	2.79874e-08	-0.396917	0.560866	-3.69702	0.00862228	-4.41671	0.00323843	-7.1787	4.89229e-11	-4.80232	0.000106731
FBgn0015568	alpha-Est1	0.18	0.16	0.2	69.32	51	62.34	43.36	42.93	42.43	33.1	27.26	22.92	42.11	44.7	42.78	14.94	16.65	15.35	0.18	0.02	60.8867	9.24607	42.9067	0.465439	27.76	5.10839	43.1967	1.34433	15.6467	0.892767	8.90179	1.00597e-173	8.2418	2.71195e-175	-0.690479	3.81885e-07	-1.41045	1.68781e-18	7.34018	1.32838e-110	-1.62009	6.79189e-88	-1.07009	1.80339e-12	-2.53302	1.0822e-73	6.2648	2.69087e-90
FBgn0267105	CG45545	0	0	0	0	0	0	0	0	0	0	0	0	0	0	0	0	0	0	0	0	0	0	0	0	0	0	0	0	0	0	NA	NA	NA	NA	NA	NA	NA	NA	NA	NA	NA	NA	NA	NA	NA	NA	NA	NA
FBgn0083963	Nlg3	0.76	1.02	1.32	0.01	0	0	0.01	0.02	0	0	0.02	0	0	0	0	0	0	0	1.03333	0.280238	0.00333333	0.0057735	0.01	0.01	0.00666667	0.011547	0	0	0	0	-7.39041	1.28185e-15	-6.19315	7.95108e-21	1.02503	NA	0.277516	NA	-7.06911	2.24157e-08	NA	NA	-1.8022	NA	-1.58548	NA	-8.87802	1.48548e-12
FBgn0051146	Nlg1	0.36	0.26	0.27	5.69	4.99	4.19	6.83	5.82	6.82	0.23	0.29	0.27	0.17	0.39	0.25	0	0	0	0.296667	0.0550757	4.95667	0.750555	6.49	0.580259	0.263333	0.0305505	0.27	0.111355	0	0	4.53835	3.18888e-87	4.77817	2.52397e-120	0.207358	0.245488	-4.51587	4.33502e-53	-0.126849	0.810392	-6.86263	6.99032e-07	-6.89849	1.51833e-06	-11.4696	2.56902e-21	-7.02844	1.54635e-07
FBgn0037512	CG2616	0.27	0.22	0.37	0	0	0	0	0	0.01	0	0	0	0	0	0	0	0	0	0.286667	0.0763763	0	0	0.00333333	0.0057735	0	0	0	0	0	0	-6.16615	0.000462008	-5.31559	0.00120597	0.819252	NA	NA	NA	-4.3249	0.0123248	NA	NA	NA	NA	NA	NA	-5.11309	0.00190028
FBgn0262899	CG43254	0.09	0	0	0	0	0	0	0	0	0	0	0	0	0	0	0	0	0	0.03	0.0519615	0	0	0	0	0	0	0	0	0	0	-1.03979	NA	-1.10682	NA	NA	NA	NA	NA	0.804573	NA	NA	NA	NA	NA	NA	NA	0.0927143	NA
FBgn0037513	pyd3	53.11	63.09	59.01	12.78	12.56	10.39	30.97	30.01	30.64	1.36	1.39	1.68	1.28	1.48	1.14	1.43	1.97	1.86	58.4033	5.01758	11.91	1.32095	30.54	0.48775	1.47667	0.17673	1.3	0.17088	1.75333	0.285365	-1.79733	4.60406e-44	-0.586795	2.00211e-08	1.17736	1.35916e-26	-3.30904	1.13615e-30	-5.25878	1.15674e-104	0.274013	0.518395	0.0158989	0.97901	-3.3455	1.46623e-43	-5.24698	1.00694e-160
FBgn0037514	CG10919	0.2	0.25	0.29	0	0	0	0	0.04	0.03	0	0	0	0	0	0	0	0	0	0.246667	0.0450925	0	0	0.0233333	0.0208167	0	0	0	0	0	0	-4.75137	0.0471304	-2.98932	0.111152	1.7017	NA	NA	NA	-2.90832	NA	NA	NA	NA	NA	NA	NA	-3.6642	0.0900748
FBgn0037515	Sp7	1.91	1.18	2.02	8.32	7.31	11.57	13.4	12.08	15.07	9.55	8.7	4.96	16.07	16.51	13.97	16.26	21.76	16.22	1.70333	0.456545	9.06667	2.22599	13.5167	1.49841	7.73667	2.44193	15.5167	1.3574	18.08	3.18704	2.90978	1.88915e-22	3.32373	1.69409e-47	0.383973	0.159575	-0.501216	0.111816	2.25611	3.92859e-11	0.0626304	0.738812	0.969493	0.000219575	0.418294	0.0932335	3.22147	1.00273e-35
FBgn0037516	CG11286	0.05	0	0.05	0	0.08	0	0	0.04	0	0	0	0	0	0	0	0	0	0	0.0333333	0.0288675	0.0266667	0.046188	0.0133333	0.023094	0	0	0	0	0	0	0.233584	NA	-1.01329	NA	-1.28363	NA	-0.163641	NA	-0.0872632	NA	NA	NA	NA	NA	-0.966715	NA	-0.844168	NA
FBgn0042104	CG18747	0.19	0.37	0.33	0.13	0.22	0	0.04	0	0.11	0	0	0	0	0	0	0	0	0	0.296667	0.0945163	0.116667	0.110604	0.05	0.0556776	0	0	0	0	0	0	-0.83676	0.547512	-2.19448	0.0961273	-1.40218	0.626772	-3.10251	0.330741	-4.09516	0.0226192	NA	NA	NA	NA	-3.93281	0.187315	-4.87792	0.00429724
FBgn0042102	CG18745	0.27	0.03	0.28	0.04	0.03	0	0.02	0	0.06	0.15	0	0	0	0	0	0	0	0	0.193333	0.141539	0.0233333	0.0208167	0.0266667	0.0305505	0.05	0.0866025	0	0	0	0	-2.62617	0.129131	-2.42845	0.151651	0.141101	NA	0.929231	NA	-1.8286	0.339727	NA	NA	-2.57924	0.586173	-1.71541	NA	-4.42924	0.0358275
FBgn0042105	CG18748	0	0	0.03	0	0.08	0	0.05	0	0	0	0	0	0	0	0	0	0	0	0.01	0.0173205	0.0266667	0.046188	0.0166667	0.0288675	0	0	0	0	0	0	1.89483	0.684619	0.854739	NA	-1.08226	NA	-1.02141	NA	0.725555	NA	NA	NA	NA	NA	-1.84894	NA	-0.0559152	NA
FBgn0042103	CG18746	0	0.03	0.02	0.04	0	0	0	0	0	0	0	0	0	0	0	0	0	0	0.0166667	0.0152753	0.0133333	0.023094	0	0	0	0	0	0	0	0	0.0750064	NA	-2.06892	NA	-2.17028	NA	-0.0879032	NA	-0.157233	NA	NA	NA	NA	NA	-0.924513	NA	-0.945522	NA
FBgn0037517	CG10086	0.22	0	0.17	0.47	0.08	0	0.24	0.04	0.34	0	0	0	0	0.02	0	0	0	0	0.13	0.115326	0.183333	0.251462	0.206667	0.152753	0	0	0.00666667	0.011547	0	0	0.914927	0.630288	0.988008	0.477667	0.0533411	0.984484	-4.15334	0.112934	-3.38339	0.211677	0.00396643	NA	NA	NA	-4.99495	0.048376	-4.16987	0.122298
FBgn0037518	CG2641	5.73	5.57	5.43	7.42	5.83	6.11	8.5	8.53	9.03	3.97	4.53	5.33	3.93	4.37	4.56	6.1	5.45	5.8	5.57667	0.150111	6.45333	0.848783	8.68667	0.297714	4.61	0.68352	4.28667	0.323161	5.78333	0.32532	0.703481	0.000828835	0.984383	5.83085e-09	0.248998	0.234056	-0.776665	0.00204765	-0.222657	0.365857	0.289791	0.16193	0.106762	0.712735	-0.720709	0.000630333	-0.117169	0.558129
FBgn0042101	CG18744	0	0	0.11	0	0	0	0.07	0	0.08	0.26	0.15	0.4	0.15	0.35	0.28	0	0	0	0.0366667	0.0635085	0	0	0.05	0.043589	0.27	0.1253	0.26	0.101489	0	0	-2.77442	NA	0.78272	0.800948	3.54579	NA	5.91448	0.00521251	2.90374	0.0913688	-4.58522	0.0100127	-4.69792	0.0272472	NA	NA	-1.74462	NA
FBgn0037519	CG3014	0.06	0.02	0.11	0.31	0	0	0.64	0.07	0.31	3.67	4.36	4.42	1.04	1.31	1.08	0	0.07	0	0.0633333	0.0450925	0.103333	0.178979	0.34	0.286182	4.15	0.416773	1.14333	0.145717	0.0233333	0.0404145	1.17536	0.60057	2.72173	0.0136715	1.5486	0.706042	5.06101	0.0331151	6.01482	2.6697e-28	-6.4885	6.31972e-07	-8.43396	1.13084e-11	-3.41744	0.267993	-2.35374	0.290696
FBgn0037520	CG18268	0	0.03	0.08	0.53	0	0	0.75	0.1	0.51	4.77	5.97	5.52	1.61	1.35	1.26	0.05	0.09	0	0.0366667	0.0404145	0.176667	0.305996	0.453333	0.328684	5.42	0.606218	1.40667	0.181751	0.0466667	0.0450925	2.78522	0.27751	3.97698	0.00250606	1.21071	0.633449	4.68601	0.052094	7.25459	1.18615e-19	-5.31009	3.68268e-06	-7.35498	7.72377e-12	-2.48796	0.357649	0.160364	0.948967
FBgn0037521	CG2993	1.34	1.95	1.86	0.96	1.5	1.19	8.1	8	9.78	1.18	1.27	0.81	1.19	0.95	0.82	1.43	1.19	1.7	1.71667	0.329292	1.21667	0.270986	8.62667	1.00007	1.08667	0.24379	0.986667	0.187705	1.44	0.255147	0.0098757	0.978004	2.68483	9.2847e-47	2.63431	2.50072e-42	-0.42206	0.303074	-0.558043	0.0991441	0.414869	0.204519	0.160815	0.705742	-0.311462	0.365348	-0.401688	0.170107
FBgn0051472	sgll	41.04	62.98	56.27	41.61	47.34	49.7	57.99	56.13	62.69	67.24	65.07	61.2	76.09	69.48	77.56	94.04	85.1	87.14	53.43	11.2423	46.2167	4.16034	58.9367	3.38091	64.5033	3.05961	74.3767	4.30386	88.76	4.685	0.298675	0.0954239	0.496289	0.00189236	0.163928	0.292086	0.200335	0.109119	0.349539	0.027605	0.111414	0.13919	0.223556	0.0087857	0.37349	0.000501955	0.568773	0.000193601
FBgn0051473	CG31473	13.91	16.95	15.23	2.07	1.25	1.61	3.1	2.92	2.85	0.61	0.94	1.29	0.73	0.44	0.71	0	0.14	0.47	15.3633	1.52438	1.64333	0.411015	2.95667	0.12897	0.946667	0.340049	0.626667	0.161967	0.203333	0.241316	-2.73657	8.50149e-26	-2.03145	1.01805e-25	0.669595	0.0943386	-1.11757	0.0874649	-4.01492	1.18138e-25	-1.67853	0.136506	-2.36634	0.0556284	-3.48229	7.52941e-05	-6.23533	2.45137e-28
FBgn0085413	CG34384	1	1.41	1.41	0.1	0.22	0.25	1.75	1.7	1.69	0.1	0.14	0.08	0.03	0.02	0.02	0.01	0.02	0.02	1.27333	0.236714	0.19	0.0793725	1.71333	0.0321455	0.106667	0.0305505	0.0233333	0.0057735	0.0166667	0.0057735	-2.21386	1.38873e-09	0.782535	9.25495e-06	2.95867	1.43502e-21	-1.11037	0.108285	-3.45125	7.36105e-19	-0.462856	0.774249	-2.89235	0.0153689	-4.06532	4.66956e-05	-6.39158	3.30189e-16
FBgn0037525	CG17816	15.9	21.8	25.32	9.28	11.25	10.34	23.21	20.79	19.79	8.73	9.62	6.3	5.88	6.56	6.06	6.56	5.86	6.58	21.0067	4.75985	10.29	0.985951	21.2633	1.75845	8.21667	1.7185	6.16667	0.352326	6.33333	0.410041	-0.521433	0.00223148	0.372427	0.0224633	0.860355	1.86266e-13	-0.595808	0.000417759	-1.27068	1.51326e-10	-0.0992299	0.484049	-0.61447	0.000671189	-1.26135	6.47114e-22	-1.89036	2.39117e-27
FBgn0037526	ArgRS-m	16.67	17.12	16.48	15	16.33	14.21	15.52	14.47	14.33	20.83	20.04	17.37	29.42	29.35	29.89	33.28	27.92	32.4	16.7567	0.328684	15.18	1.0714	14.7733	0.65041	19.4133	1.81313	29.5533	0.293655	31.2	2.87444	0.352321	0.00567468	0.162941	0.191479	-0.223216	0.060259	0.0811927	0.570187	0.284696	0.0331592	-0.0592541	0.520982	0.447867	0.000135349	0.478002	6.3628e-06	0.729457	1.30484e-11
FBgn0037529	mRpS9	115.59	97.41	96.09	115.49	128.12	106.79	104.55	101.19	91.5	89.38	91.02	90.47	92.87	91.97	88.2	120.06	119.17	116	103.03	10.8973	116.8	10.7252	99.08	6.77604	90.29	0.834686	91.0133	2.47763	118.41	2.13403	0.668724	6.66331e-06	0.282237	0.0621553	-0.420259	3.58734e-05	-0.650404	1.63078e-14	-0.129342	0.36744	0.232522	0.000124429	0.155363	0.0286071	-0.54626	4.67036e-12	0.0240283	0.859763
FBgn0260005	wtrw	3.88	4.07	4.6	3.3	2.79	2.26	5.45	4.63	5.69	6.55	7	7.05	3.19	3.3	2.77	0.22	0.1	0.15	4.18333	0.37314	2.78333	0.520032	5.25667	0.555818	6.86667	0.275379	3.08667	0.279702	0.156667	0.0602771	-0.0914916	0.677172	0.678237	1.14922e-05	0.737656	6.95615e-05	1.02484	1.73943e-08	0.782205	6.33516e-08	-4.37827	5.83363e-33	-5.6197	1.75771e-57	-4.65262	1.2765e-31	-4.84069	3.45898e-41
FBgn0037530	EMC1	46.83	49.29	53.49	107.37	117.72	98.87	114.84	121.98	96.05	121.94	125.06	109.44	112.59	116.41	115.25	153.2	144.61	153.56	49.87	3.36767	107.987	9.44012	110.957	13.3941	118.813	8.26608	114.75	1.95847	150.457	5.06656	1.61157	8.43573e-65	1.50145	3.89991e-37	-0.142803	0.365746	-0.13939	0.119918	1.32264	4.10758e-47	0.246768	3.91012e-09	0.104059	0.081903	-0.0860696	0.237154	1.42292	2.85467e-91
FBgn0024909	Taf7	31.63	34.95	35.66	17.72	20.38	14.82	22.55	20.1	16.9	46.76	47.47	52.84	42.78	41.19	43.89	63.62	59.94	57.44	34.08	2.15126	17.64	2.78086	19.85	2.83328	49.0233	3.32434	42.62	1.35709	60.3333	3.10872	-0.4546	0.00161827	-0.434468	0.00204825	-0.0121489	0.968423	1.1951	7.96178e-21	0.590115	5.95991e-09	0.354771	4.4592e-07	0.0688006	0.511113	1.2109	3.65978e-23	0.653713	3.9757e-13
FBgn0004901	Prat	53.08	57.24	56.79	112.27	130.78	116.77	119.7	108.22	112	83.5	83.68	90.22	104.41	103.17	102.64	119.96	128.67	130.82	55.7033	2.28299	119.94	9.65358	113.307	5.85048	85.8	3.82889	103.407	0.908424	126.483	5.75074	1.60337	1.69818e-57	1.3703	2.44082e-58	-0.266688	0.00692843	-0.764943	3.24184e-20	0.689721	2.02978e-16	0.144634	0.00937039	0.327294	4.26278e-06	-0.489471	4.73882e-10	1.01207	4.91687e-42
FBgn0014930	CG2846	84.12	86.58	94.42	52.56	52.99	54.13	61.68	58.58	57.2	40.54	37.1	43.12	45.68	48.2	48.34	45.61	46.52	47.18	88.3733	5.37908	53.2267	0.811316	59.1533	2.29437	40.2533	3.02022	47.4067	1.49697	46.4367	0.78831	-0.232103	0.0370929	-0.232539	0.0180209	-0.0334811	0.834256	-0.690068	3.22846e-09	-1.07153	1.09167e-20	-0.176395	0.0430774	-0.0236787	0.868383	-0.765588	5.16103e-16	-1.10046	4.56352e-33
FBgn0014931	CG2678	35.35	49.85	46.75	51.68	48.72	49.02	57.86	57.55	55.67	38.16	38.75	47.27	28.21	27.79	29.64	34.28	27.33	32.45	43.9833	7.63566	49.8067	1.62927	57.0267	1.18509	41.3933	5.09789	28.5467	0.969863	31.3533	3.60245	0.684193	5.61727e-07	0.727633	2.5142e-08	0.0112797	0.939281	-0.554669	4.87376e-07	-0.0169674	0.919337	-0.00213985	0.986181	-0.627312	6.61471e-07	-1.22927	5.70357e-34	-0.651213	1.28093e-05
FBgn0037531	CG10445	48.83	49.86	51.78	10.06	10.03	9.34	13.48	11.61	11.23	32.12	34.65	34.84	17.06	17.28	20.34	26.7	23.65	27.37	50.1567	1.49721	9.81	0.407308	12.1067	1.20442	33.87	1.51852	18.2267	1.8335	25.9067	1.98283	-1.85847	5.76068e-81	-1.70635	2.30469e-58	0.119313	0.451844	1.50742	1.83204e-64	-0.500154	7.77142e-09	0.36636	9.23425e-05	-0.615443	7.20887e-14	0.839151	5.14488e-19	-1.12053	5.36794e-39
FBgn0002542	lds	53.1	68.9	63.88	45.98	50.02	44.18	43.52	40.37	44.21	119.72	122.22	111.61	132.58	129.11	141.97	168.34	161.76	170.88	61.96	8.07309	46.7267	2.99074	42.7	2.04712	117.85	5.54668	134.553	6.65323	166.993	4.70678	0.0935518	0.455322	-0.186778	0.119049	-0.313691	0.00020999	1.05623	4.6014e-49	1.0006	1.95378e-22	0.167431	0.000172492	0.266438	6.46116e-09	1.27194	6.87825e-107	1.26338	5.45131e-41
FBgn0000504	dsx	1.89	6.84	6.07	6.57	7.29	8.81	10.2	9.17	12.55	1.29	1.35	1.44	0.71	1	0.89	0.19	0.21	0.27	4.93333	2.66358	7.55667	1.14356	10.64	1.73243	1.36	0.0754983	0.866667	0.146401	0.223333	0.0416333	1.14419	0.00203635	1.48063	0.00697672	0.30411	0.169858	-2.77132	1.85201e-36	-1.77349	2.67056e-05	-2.08636	1.23785e-06	-2.82068	2.04324e-10	-5.63113	1.60072e-68	-4.60743	2.98954e-19
FBgn0037533	CD98hc	76.05	67.29	80.84	194.99	178.31	168.91	124.63	129.28	120.86	252.32	268.03	248.61	360.4	346.45	365.77	458.55	461.7	469.16	74.7267	6.87125	180.737	13.2083	124.923	4.21766	256.32	10.3094	357.54	9.97248	463.137	5.44895	1.76948	2.90931e-50	1.08656	1.65639e-22	-0.715602	3.70743e-19	0.224499	0.00349359	1.84403	6.3534e-68	0.2283	2.42108e-11	0.617793	3.12862e-53	0.791515	5.93269e-31	2.45866	7.94393e-137
FBgn0010401	Os-C	0.51	0.28	0.29	1.31	1.81	0.45	1.79	1.61	1.23	2.77	1.63	1.75	0.25	0.34	0.15	0	0	0	0.36	0.13	1.19	0.687895	1.54333	0.28589	2.05	0.626418	0.246667	0.0950438	0	0	2.18237	0.0222028	2.41443	0.00153538	0.195642	0.868683	0.523145	0.560903	2.55927	0.00200092	-3.10122	0.217062	-6.23802	7.0776e-05	-5.76773	0.000495236	-3.68064	0.0934268
FBgn0259974	Sfp84E	0	0	0	0.1	0.07	0	0.19	0	0.04	0	0.15	0.27	0	0	0	0	0	0	0	0	0.0566667	0.051316	0.0766667	0.100167	0.14	0.135277	0	0	0	0	2.77449	NA	3.08399	NA	0.281554	NA	1.03959	NA	3.68135	NA	NA	NA	-2.68857	0.527322	-1.67722	NA	NA	NA
FBgn0037534	CG2781	0.32	0.55	0.51	16.33	19.6	18.89	30.36	32.01	34.54	27.95	26.96	32.34	3.32	3.43	2.37	0.04	0	0.03	0.46	0.122882	18.2733	1.72001	32.3033	2.10538	29.0833	2.86347	3.04	0.582838	0.0233333	0.0208167	5.82269	3.70663e-129	6.49392	1.496e-186	0.636298	3.80504e-07	0.383525	0.00472823	6.05784	1.37801e-150	-6.93832	1.77137e-10	-10.2798	1.41035e-23	-9.94458	2.65753e-22	-4.2482	0.000745006
FBgn0037535	PIG-H	31.58	31.21	28.67	29.79	27.25	27	30.46	29.65	29.4	34.06	42.49	34.14	71.54	70.03	72.19	75.75	78.63	79.69	30.4867	1.58412	28.0133	1.54371	29.8367	0.554106	36.8967	4.84413	71.2533	1.10817	78.0233	2.03886	0.371635	0.0162388	0.312876	0.0282238	-0.0914868	0.577495	0.122632	0.453499	0.345161	0.0320005	-0.0155869	0.861359	0.839174	4.00016e-12	0.912244	2.2819e-18	1.18352	6.08971e-26
FBgn0266598	Kmn2	129.14	161.24	142.36	38.11	38.59	35.47	47.13	47.99	40.22	44.02	46.5	43.55	95.48	89.92	99.1	68.68	49.47	64.24	144.247	16.133	37.39	1.68	45.1133	4.25951	44.69	1.58502	94.8333	4.62404	60.7967	10.0573	-1.44828	7.69136e-31	-1.32938	2.40511e-23	0.0862116	0.671796	-0.021069	0.901274	-1.61755	6.5033e-36	-0.770528	1.74289e-11	0.216628	0.216889	0.143819	0.369369	-1.40565	2.99026e-22
FBgn0037536	CG2698	42.26	55.11	59.46	58.58	49.05	51.73	58.78	57.43	59.85	57.05	57.81	58.53	75.79	76.01	79.86	78.7	71.52	78.55	52.2767	8.9432	53.12	4.9147	58.6867	1.2127	57.7967	0.74009	77.22	2.28895	76.2567	4.10276	0.528893	0.000186714	0.520511	2.4799e-05	-0.0402412	0.807581	-0.159818	0.115544	0.218953	0.0797356	-0.160487	0.00184638	0.168269	0.00521074	-0.0454462	0.654507	0.378953	0.00267635
FBgn0037537	CG2767	31.52	31.96	36.66	51.52	57.1	61.32	60.81	61.39	67.28	72.04	67.58	59.58	46.96	49.18	49.14	37.61	39.36	37.98	33.38	2.84907	56.6467	4.9157	63.16	3.57979	66.4	6.31326	48.4267	1.27033	38.3167	0.922298	1.26471	9.36225e-22	1.26883	3.3419e-30	-0.0296895	0.890934	-0.049547	0.734472	1.06535	1.01961e-17	-0.487781	2.5168e-10	-1.03591	4.63101e-24	-1.13499	1.7289e-24	0.0255898	0.824231
FBgn0040524	CG11052	13.61	12.63	19.99	0	0.2	0.14	0.38	0.74	0.49	0	0.36	0	0.07	0	0.07	0	0.26	0	15.41	3.99655	0.113333	0.102632	0.536667	0.184481	0.12	0.207846	0.0466667	0.0404145	0.0866667	0.150111	-6.55021	3.11325e-26	-4.47588	4.19201e-31	2.06232	0.173892	-0.148803	NA	-6.80835	5.68728e-10	0.0419796	NA	-1.44953	0.722933	-1.66617	0.58839	-8.41161	7.89802e-12
FBgn0037538	CG3223	63.22	60.31	58.5	20.8	25.09	18.96	27.45	23.84	22.67	33.57	37.12	32.37	45.33	45.23	43.98	57.79	60.35	57.81	60.6767	2.38127	21.6167	3.14554	24.6533	2.49163	34.3533	2.46999	44.8467	0.752219	58.65	1.47228	-0.99803	5.75647e-12	-0.958496	1.29766e-13	0.00587866	0.982919	0.393094	0.0045065	-0.752399	9.77162e-10	0.237875	0.000771836	0.529596	2.71757e-08	0.874184	4.59947e-14	-0.224069	0.0319611
FBgn0037539	CG10435	68.6	67.15	69.98	23.98	21.94	21.31	25.66	26.84	25.06	45.23	47.58	50.6	73.81	69.35	74.44	80.25	89.02	83.04	68.5767	1.41514	22.41	1.39567	25.8533	0.905612	47.8033	2.69196	72.5333	2.77479	84.1033	4.48065	-1.11877	1.36836e-23	-1.06213	1.13174e-25	0.0239344	0.896085	0.810619	9.00132e-16	-0.457302	5.13821e-06	0.0649775	0.372194	0.582575	2.24045e-11	1.34124	1.02038e-47	0.120641	0.207899
FBgn0037540	Pbp95	12.16	15.48	14.72	4.5	5.68	5.45	6.42	6.12	7.06	27.54	29.89	28.53	41.49	39.96	41.03	40.72	36.46	42.51	14.12	1.73943	5.21	0.62554	6.53333	0.480139	28.6533	1.17984	40.8267	0.785005	39.8967	3.1079	-0.9331	8.21421e-09	-0.760852	6.73959e-08	0.137554	0.55769	2.17412	9.8358e-66	1.09334	7.79598e-22	-0.172119	0.0127206	0.246918	0.004995	2.36795	8.39362e-87	1.33365	1.32547e-32
FBgn0037541	CG2747	13.31	13.76	15.32	23.84	29.55	25.25	32.1	30.97	30.83	51.11	50.28	48.3	33.24	35.3	35.56	52.74	50.05	49.69	14.13	1.05485	26.2133	2.9744	31.3	0.696348	49.8967	1.44369	34.7	1.27106	50.8267	1.66674	1.38951	1.45549e-33	1.49513	7.32945e-71	0.0719844	0.64651	0.649931	7.64569e-13	1.88998	8.4773e-109	0.405115	1.8528e-15	-0.209702	7.24736e-05	0.389852	8.74391e-06	1.67619	1.94119e-98
FBgn0001255	ImpE3	9.67	6.63	7.26	1.87	1.92	0.94	2.58	2.23	2.07	0.54	1.57	1.63	1.7	1.4	1.33	3.18	2.15	2.47	7.85333	1.6045	1.57667	0.551936	2.29333	0.260832	1.24667	0.612726	1.47667	0.196554	2.6	0.527162	-1.84093	3.12361e-07	-1.44384	3.73467e-07	0.364356	0.510181	-0.628971	0.350288	-2.62424	1.52208e-09	0.683107	0.0787646	0.850143	0.167879	0.169936	0.726063	-1.763	2.54798e-08
FBgn0037543	CG10903	51.47	58.16	51.98	66.52	81.94	64.68	59.42	55.7	51.59	39.87	40.83	39.23	33.42	36.34	37.41	32.88	29.28	31.98	53.87	3.72399	71.0467	9.47866	55.57	3.91662	39.9767	0.805316	35.7233	2.06524	31.38	1.8735	0.894066	2.25859e-11	0.390186	0.00105891	-0.537667	1.54981e-05	-1.10649	6.24815e-21	-0.360071	0.00204335	-0.326837	0.00109301	-0.581572	1.9422e-07	-1.74025	2.57135e-51	-0.945665	1.08722e-18
FBgn0037544	CG11035	23.19	26.37	24.24	16.24	13.82	12.37	13.26	14.98	13.34	16.93	18.11	14.21	27.34	25.44	26.82	28.72	32.78	28.18	24.6	1.62028	14.1433	1.95516	13.86	0.970773	16.4167	2.00003	26.5333	0.981903	29.8933	2.51446	-0.304177	0.0873696	-0.47909	0.0016727	-0.207519	0.343305	-0.0535992	0.818349	-0.502928	0.00262228	0.0144367	0.924022	0.615075	0.000537932	0.511694	0.00275994	0.103509	0.470413
FBgn0010812	unc-45	29.01	34.82	33.61	20.94	22.77	19.72	24.56	26	23.24	31.96	32.64	31.07	24.32	23.5	25.74	20.16	20.6	22.15	32.48	3.0654	21.1433	1.53513	24.6	1.38043	31.89	0.787337	24.52	1.13331	20.97	1.04532	-0.120253	0.304683	-0.051446	0.673778	0.0356197	0.832359	0.314958	0.000432757	0.0458221	0.652556	-0.369294	3.24409e-07	-0.839941	4.92179e-26	-0.576662	7.60923e-11	-0.798885	3.46897e-17
FBgn0262362	CG43060	0.22	0.05	0.21	0.1	0.21	0.12	0.29	0.05	0.29	0	0	0	0	0	0	0	0	0	0.16	0.0953939	0.143333	0.0585947	0.21	0.138564	0	0	0	0	0	0	0.355155	0.836859	0.695812	0.650446	0.306455	0.910654	-2.46582	NA	-2.25724	NA	NA	NA	NA	NA	-3.26676	0.271698	-3.01177	0.234496
FBgn0263596	CG43618	0	0	0	0	0	0	0	0	0	0	0	0	0	0	0	0	0	0	0	0	0	0	0	0	0	0	0	0	0	0	NA	NA	NA	NA	NA	NA	NA	NA	NA	NA	NA	NA	NA	NA	NA	NA	NA	NA
FBgn0262363	CG43061	0	0	0	0	0	0	0	0	0	0	0	0	0	0	0	0	0	0	0	0	0	0	0	0	0	0	0	0	0	0	NA	NA	NA	NA	NA	NA	NA	NA	NA	NA	NA	NA	NA	NA	NA	NA	NA	NA
FBgn0037546	mAChR-B	0.08	0.23	0.34	0.13	0.16	0.18	0.05	0.03	0.03	0.06	0.14	0.21	0.04	0.05	0.03	0	0.03	0	0.216667	0.130512	0.156667	0.0251661	0.0366667	0.011547	0.136667	0.0750555	0.04	0.01	0.01	0.0173205	0.0197805	0.979979	-2.1649	0.00945803	-2.22086	0.00385099	-0.513326	0.582357	-0.644599	0.470344	-2.7222	0.182867	-4.60131	0.00994661	-5.14055	0.000501523	-5.23338	0.000502584
FBgn0037547	CG7910	1.03	0.99	1.23	2.73	4.65	8.05	6.1	8.8	8.4	2.02	2.37	2.32	1.65	0.95	0.64	0.04	0	0.07	1.08333	0.128582	5.14333	2.69409	7.76667	1.45717	2.23667	0.189297	1.08	0.517397	0.0366667	0.0351188	2.75997	1.14629e-11	3.18931	5.42629e-37	0.395921	0.444465	-1.50008	0.000331729	1.10717	0.00101701	-4.82225	5.44466e-06	-5.94676	9.2643e-10	-7.49762	6.8481e-15	-4.84542	9.88311e-07
FBgn0037548	CG7900	1.83	1.89	2.22	11.14	9.49	8.57	3.48	3.7	2.71	2.07	3.35	2.58	4.77	5.57	5.31	1.26	1.38	0.83	1.98	0.21	9.73333	1.30216	3.29667	0.51984	2.66667	0.644386	5.21667	0.408085	1.15667	0.289194	2.79273	4.91054e-46	1.08145	1.61814e-05	-1.74452	1.43502e-21	-2.13716	4.56692e-19	0.503383	0.114562	-2.36486	5.88469e-19	-1.46504	0.000438568	-3.68324	9.45771e-46	-0.9759	0.00593637
FBgn0243512	puc	31.27	45.12	45.26	18.2	17.21	20.63	20.68	19.04	25.78	35.76	36.48	38.27	22.67	23.34	23.56	18.09	16.44	20.56	40.55	8.03702	18.68	1.7598	21.8333	3.5149	36.8367	1.29245	23.19	0.463573	18.3633	2.07356	-0.608323	0.000266059	-0.537501	0.00246808	0.0374658	0.896632	0.694478	2.76744e-09	-0.063493	0.675692	-0.473041	1.20062e-07	-1.23054	1.05978e-36	-0.590814	9.46608e-06	-1.3048	1.16542e-16
FBgn0037549	CG7878	255.97	280.02	259.9	167.43	185.87	150.17	162.83	159.12	141.48	109.73	113.94	116.09	86.47	88.36	92.35	73.38	69.32	81.01	265.297	12.9013	167.823	17.8532	154.477	11.4073	113.253	3.23512	89.06	3.00185	74.57	5.93516	-0.166668	0.154308	-0.435162	2.36161e-05	-0.301504	0.00628012	-0.846179	1.81711e-26	-1.16103	1.11663e-48	-0.397772	1.77944e-10	-0.834083	2.86512e-36	-1.73322	1.39957e-89	-2.00028	1.43917e-125
FBgn0037550	CG9667	118.81	123.3	110.31	43.69	59.89	43.46	51.25	46.85	38.28	41.8	42.36	40.54	42.25	38.2	40.99	40.75	46.49	42.65	117.473	6.59735	49.0133	9.42017	45.46	6.59578	41.5667	0.932166	40.48	2.07261	43.2967	2.92413	-0.769808	2.07143e-06	-1.02816	2.54518e-12	-0.291697	0.168895	-0.514251	0.00114266	-1.43099	1.04249e-31	-0.0565935	0.638609	-0.183258	0.189844	-0.745983	1.1926e-06	-1.61828	4.97538e-45
FBgn0037551	Gie	52.15	60.13	61.96	53.06	53.68	48.23	80.55	82.22	74.3	69.98	82.8	79.71	117.44	111.38	114.85	123.87	112.05	114.61	58.08	5.21641	51.6567	2.98373	79.0233	4.17488	77.4967	6.69046	114.557	3.04063	116.843	6.21843	0.329752	0.00248654	0.79273	1.08606e-14	0.430116	5.29065e-06	0.304486	0.00341878	0.484793	9.62037e-06	-0.114993	0.0923595	0.360058	8.41442e-05	0.613211	3.0678e-13	0.839716	1.45571e-19
FBgn0001138	grn	0.11	0.16	0.08	0.01	0	0.01	0.07	0.1	0.13	0	0	0	0.01	0.01	0.01	0.02	0	0	0.116667	0.0404145	0.00666667	0.0057735	0.1	0.03	0	0	0.01	0	0.00666667	0.011547	-4.16154	0.00822475	0.155764	0.863913	4.28145	0.00841175	-0.0235557	NA	-4.25124	0.0163945	-0.724829	NA	0.14051	NA	0.0676951	NA	-4.11014	0.0110568
FBgn0261290	CheA84a	0	0	0	0.06	0	0	0	0	0	0	0	0	0	0	0	0	0	0	0	0	0.02	0.034641	0	0	0	0	0	0	0	0	0.874542	NA	NA	NA	-1.06186	NA	1.03155	NA	NA	NA	NA	NA	NA	NA	0.252525	NA	NA	NA
FBgn0037552	CG7800	16.23	18.9	19.29	26.59	28.66	26.65	35.79	33.35	35.36	26.92	26.24	33.03	16.01	15.98	16.3	20.82	17.54	18.38	18.14	1.66556	27.3	1.17818	34.8333	1.30247	28.73	3.7394	16.0967	0.17673	18.9133	1.7038	1.09069	4.05564e-22	1.2908	3.57172e-35	0.166505	0.112547	-0.215361	0.0997479	0.727492	1.45816e-07	0.0913636	0.435613	-0.829624	2.2147e-09	-1.09293	1.22917e-24	-0.105543	0.42478
FBgn0037553	CG18249	1.56	1.18	1.59	2.24	3.36	2.66	3.32	2.27	3.76	0.96	0.84	0.85	0.66	0.73	0.74	0.11	0.07	0.25	1.44333	0.228546	2.75333	0.565803	3.11667	0.765528	0.883333	0.0665833	0.71	0.043589	0.143333	0.0945163	1.42014	2.0587e-06	1.44868	2.02633e-06	-0.00751394	0.989572	-1.91726	5.95776e-07	-0.646241	0.132159	-2.32793	0.000710423	-2.75931	0.000441533	-4.68703	1.294e-17	-3.38223	3.66905e-08
FBgn0037554	DNApol-iota	72.14	67.89	77.61	12.52	11.3	11.47	14.25	15.09	14.13	36.39	35.14	33.9	53.86	54.55	57.35	70.65	69.92	72.36	72.5467	4.87274	11.7633	0.660782	14.49	0.523068	35.1433	1.245	55.2533	1.84825	70.9767	1.25237	-2.12808	9.71172e-78	-1.97735	2.25969e-80	0.117929	0.416881	1.30055	2.40926e-39	-0.977338	1.6544e-21	0.216221	1.30509e-05	0.777262	1.07905e-33	2.02738	4.45853e-138	-0.203857	0.0258184
FBgn0037555	Ada2b	37.84	39.07	41.44	52.11	47.25	49.59	40.72	43.92	43.72	148.07	154.16	146.1	208.64	188.11	205.66	242.95	233.25	244.73	39.45	1.82984	49.65	2.43056	42.7867	1.79258	149.443	4.20184	200.803	11.0933	240.31	6.17858	0.830427	6.4657e-15	0.464946	3.99203e-06	-0.398413	5.02376e-05	1.30907	1.87829e-62	1.98988	3.33523e-146	0.114915	0.023286	0.450071	5.98823e-27	1.70811	1.95117e-126	2.43571	0
FBgn0037556	CG9636	36.79	47.65	49.54	16.74	18.36	18.38	17.68	19.44	19.99	61.03	70.12	65.13	61.92	65.14	68.83	72.96	62.24	69.94	44.66	6.88082	17.8267	0.941134	19.0367	1.20666	65.4267	4.55226	65.2967	3.45766	68.38	5.52764	-0.819531	3.4069e-10	-0.87614	1.82348e-11	-0.0901933	0.592343	1.59349	2.6049e-67	0.624221	1.36798e-07	-0.0757376	0.322091	-0.169225	0.0330075	1.37273	4.47557e-52	0.448774	0.000289041
FBgn0042182	CG18749	3.33	6.17	6.03	1.11	1.03	1.26	2.04	1.7	2.52	1.81	1.63	1.95	1.36	1.37	1.45	0.51	0.3	0.58	5.17667	1.60079	1.13333	0.116762	2.08667	0.411987	1.79667	0.160416	1.39333	0.0493288	0.463333	0.145717	-1.67296	3.81137e-10	-0.947464	0.000472198	0.69279	0.010798	0.376369	0.225269	-1.44677	2.66528e-07	-1.68795	1.88716e-07	-2.15604	1.37006e-08	-1.83028	1.20563e-06	-3.60406	1.3891e-25
FBgn0064126	CG33722	51.16	53.41	48.74	52.45	57.39	47.61	55.65	53.65	48.78	66.43	67.48	67.81	105.07	101.13	108.06	126.85	130.86	126.79	51.1033	2.33552	52.4833	4.89009	52.6933	3.5335	67.24	0.720625	104.753	3.47584	128.167	2.33269	0.531707	1.39041e-05	0.387919	0.000960191	-0.177189	0.152427	0.0783394	0.442202	0.46237	6.27765e-06	0.143657	0.00679971	0.695689	4.08095e-26	0.722412	2.31348e-19	1.15444	1.2395e-41
FBgn0040528	CG15864	3.85	6.72	7.28	1.9	1.82	1.94	3.35	2.39	3.39	2.03	1.35	1.18	0.38	0.34	0.46	0.05	0	0.04	5.95	1.84008	1.88667	0.061101	3.04333	0.566157	1.52	0.449778	0.393333	0.061101	0.03	0.0264575	-1.13892	0.000110695	-0.609137	0.0449726	0.497496	0.114945	-0.598225	0.176173	-1.88619	5.98665e-07	-3.62806	0.00743977	-5.65345	3.07649e-06	-6.30463	1.09975e-08	-7.54713	2.39215e-12
FBgn0260386	mtg	16.89	17.41	16.94	5.2	7.2	5.48	12.44	10.25	10	1.27	1.26	1.36	1.74	1.76	1.33	0.17	0.18	0.06	17.08	0.28688	5.96	1.08296	10.8967	1.3424	1.29667	0.0550757	1.61	0.242693	0.136667	0.0665833	-1.02347	1.0337e-09	-0.305445	0.0333532	0.684345	0.000181761	-2.48727	1.37561e-19	-3.6627	1.27771e-63	-3.80553	9.84844e-11	-3.56304	2.16973e-07	-6.12511	2.21394e-32	-7.25999	1.40683e-51
FBgn0010173	RpA-70	316.94	347.82	329.85	145.41	144.68	140.12	172.49	150.72	166.91	231.18	234.28	221.4	406.95	369.05	407.43	398.51	372.5	408.11	331.537	15.5089	143.403	2.86678	163.373	11.3077	228.953	6.72251	394.477	22.0214	393.04	18.4244	-0.711774	2.66149e-15	-0.675519	9.04456e-13	0.0031681	0.983317	0.395189	3.10594e-10	-0.465345	1.07367e-09	-0.149354	0.00372209	0.544447	1.19741e-36	0.888183	3.79122e-58	0.0750966	0.277974
FBgn0014861	Mcm2	77.09	99.39	78.73	94	92.05	76.23	84.7	75.87	74.85	133.01	128.59	124.25	152.19	148.93	157.76	212.39	211.28	203.46	85.07	12.4286	87.4267	9.74549	78.4733	5.41651	128.617	4.38006	152.96	4.46508	209.043	4.86706	0.535009	0.00016985	0.22962	0.097927	-0.337883	0.00146735	0.27981	0.00195386	0.667024	2.62661e-08	0.305005	6.29222e-13	0.464655	7.31568e-19	0.693414	1.05416e-16	1.12879	1.87577e-24
FBgn0037561	CG9630	33.42	32.9	31.43	51.57	53.24	44.89	43.56	39.03	37.62	31.4	31.87	31.45	34.06	34.11	36.64	35.12	33.57	35.91	32.5833	1.0321	49.9	4.4184	40.07	3.10356	31.5733	0.258134	34.9367	1.47534	34.8667	1.19039	1.10721	3.92424e-20	0.640746	6.35582e-08	-0.499592	7.45023e-07	-0.938641	3.96576e-23	0.0203214	0.871197	-0.145363	0.0513526	-0.0895359	0.361073	-1.0805	2.15717e-35	-0.0736247	0.482219
FBgn0010433	ato	0.44	0.24	0.24	0	0	0	0	0	0	0	0	0	0	0	0	0	0	0	0.306667	0.11547	0	0	0	0	0	0	0	0	0	0	-5.7845	0.00243634	-5.85005	0.00140062	NA	NA	NA	NA	-3.93789	0.0352978	NA	NA	NA	NA	NA	NA	-4.7108	0.00812391
FBgn0037562	CG11671	22.96	24.94	30.47	7.89	4.18	5.78	8.85	6.34	5.98	0.36	0.31	0.82	0.38	0.33	0.06	0.24	0	0	26.1233	3.89233	5.95	1.86083	7.05667	1.56347	0.496667	0.281129	0.256667	0.172143	0.08	0.138564	-1.636	1.94897e-09	-1.54354	9.50509e-13	0.0630404	0.918008	-3.97807	3.24681e-08	-5.78444	2.60002e-22	-1.66757	0.436201	-2.68968	0.189009	-6.64242	2.22027e-09	-8.38134	4.44816e-16
FBgn0037563	CG11672	0.68	0.78	1.4	0.11	0.02	0.05	0.29	0.12	0.27	0	0	0	0	0	0.03	0	0	0	0.953333	0.390043	0.06	0.0458258	0.226667	0.0929157	0	0	0.01	0.0173205	0	0	-3.54895	0.00025336	-1.70511	0.020331	1.79984	0.262922	-1.67548	NA	-5.31554	0.000376092	0.0584694	NA	NA	NA	-2.49414	0.461125	-6.08967	2.881e-05
FBgn0051464	CG31464	2.65	2.27	2.32	0.13	0	0.11	0.09	0.2	0.28	0	0.28	0	0	0.12	0	0	0	0	2.41333	0.206478	0.08	0.07	0.19	0.0953939	0.0933333	0.161658	0.04	0.069282	0	0	-4.48927	3.78568e-07	-3.3004	6.66814e-07	1.08268	0.670381	0.0769351	NA	-4.34462	0.000370212	-0.931158	NA	-2.37031	NA	-2.37747	0.575597	-6.87936	2.47062e-07
FBgn0051463	CG31463	1.23	0.53	1.25	0	0	0	0	0	0	0	0	0	0.06	0	0	0	0	0	1.00333	0.410041	0	0	0	0	0	0	0.02	0.034641	0	0	-7.55831	2.97957e-07	-7.62505	1.36924e-07	NA	NA	NA	NA	-5.71634	0.000100097	-0.897964	NA	NA	NA	NA	NA	-6.49449	6.49574e-06
FBgn0037565	CG9626	5.13	6.3	6.02	34.38	28.2	26.92	36.31	29.14	37.47	2.84	2.95	2.79	6.88	8.48	7.72	0	0.02	0.08	5.81667	0.610928	29.8333	3.9892	34.3067	4.5119	2.86	0.0818535	7.69333	0.800333	0.0333333	0.0416333	2.85814	3.53199e-101	2.9089	3.67293e-107	0.0183708	0.941205	-3.65779	5.73027e-167	-0.94901	1.43303e-10	-7.80166	1.00126e-47	-6.47769	1.36289e-29	-10.1775	3.97919e-82	-7.42398	1.16946e-42
FBgn0037566	mRpL1	106.33	84.29	89.06	104.28	99.33	93.56	86.46	86.06	82.41	95.01	90.22	85.87	115.45	117.5	114.03	132.3	133.59	141.06	93.2267	11.5957	99.0567	5.36522	84.9767	2.23178	90.3667	4.57176	115.66	1.74451	135.65	4.72939	0.576069	0.000188388	0.205146	0.196827	-0.404139	2.79831e-07	-0.409661	4.33678e-06	0.0168762	0.919608	0.0856168	0.158206	0.349221	2.49422e-06	-0.111873	0.153809	0.364095	0.00942568
FBgn0265351	nac	18.93	24.53	22.42	14.78	12.5	12.42	13.58	14.57	13.34	11.03	10.66	10	16.67	15.64	16.26	17.27	19.22	18.55	21.96	2.8282	13.2333	1.34005	13.83	0.651997	10.5633	0.52176	16.19	0.518556	18.3467	0.990774	-0.229634	0.186129	-0.315678	0.0390869	-0.118024	0.574277	-0.599544	0.00151126	-0.977367	7.94701e-09	0.0277963	0.847907	0.55299	0.0019949	-0.0984351	0.552863	-0.430482	0.00290893
FBgn0265101	Sgt1	63.96	81.06	77.23	64.17	75.34	81.52	89.47	87.39	91.32	134.59	134.47	145.78	178.55	158.79	166.84	154.12	135.75	146.46	74.0833	8.97377	73.6767	8.79378	89.3933	1.96612	138.28	6.49547	168.06	9.93633	145.443	9.2271	0.496825	0.000945292	0.62185	1.11743e-08	0.0910571	0.64068	0.623456	1.51966e-07	0.971201	2.8832e-20	-0.350872	1.96951e-07	-0.157098	0.0474612	0.412686	0.000418922	0.806987	6.88496e-15
FBgn0037569	tex	67.88	64.77	57.6	37.21	45.96	32.5	34.63	32.54	28.47	30.18	31.1	23.91	30.78	30.87	28.92	38.33	30.86	32.71	63.4167	5.27193	38.5567	6.8303	31.88	3.13259	28.3967	3.9127	30.19	1.10077	33.9667	3.89033	-0.230251	0.207586	-0.652532	1.5227e-05	-0.456193	0.00598255	-0.709544	1.91803e-05	-1.08718	2.26429e-11	0.0297713	0.827726	0.0170397	0.926046	-0.743561	1.06376e-06	-1.07226	9.10181e-14
FBgn0037570	CG11693	3.42	2.53	2.96	0	0.02	0	0	0	0	0	0	0	0	0	0	0	0	0	2.97	0.445084	0.00666667	0.011547	0	0	0	0	0	0	0	0	-8.49319	2.86498e-11	-9.59664	3.2519e-14	-1.13699	NA	0.956412	NA	-7.68553	1.46101e-09	NA	NA	NA	NA	0.123753	NA	-8.47022	1.70577e-11
FBgn0037571	CG11694	2.86	2.82	2.25	0	0	0.06	0	0	0	0	0	0	0	0	0	0	0	0	2.64333	0.341223	0.02	0.034641	0	0	0	0	0	0	0	0	-6.62275	2.47331e-08	-8.53734	8.41791e-11	-1.9673	NA	0.128774	NA	-6.62477	5.53323e-07	NA	NA	NA	NA	-0.677456	NA	-7.38799	1.36434e-08
FBgn0037572	CG11698	1.41	2.2	1.7	0	0	0	0	0	0	0	0	0	0	0	0	0	0	0	1.77	0.399625	0	0	0	0	0	0	0	0	0	0	-7.8382	1.8793e-08	-7.9053	7.96077e-09	NA	NA	NA	NA	-5.99293	1.46486e-05	NA	NA	NA	NA	NA	NA	-6.75659	5.83957e-07
FBgn0037573	CG7483	210.36	265.69	213.14	154.61	191.6	152.42	168.59	172.37	147.75	100.52	111.09	102.91	93.97	96.77	97.69	112.13	110.65	114.61	229.73	31.1733	166.21	22.0156	162.903	13.2586	104.84	5.543	96.1433	1.93756	112.463	2.00093	0.028394	0.865842	-0.149417	0.303831	-0.211221	0.142046	-0.942899	4.64924e-22	-1.06227	9.85009e-20	0.08155	0.140068	-0.134279	0.0443	-1.12762	6.54509e-35	-1.1992	7.91845e-29
FBgn0037574	Coq2	20.55	26.17	26.13	21.02	26.01	22.64	22.71	20.65	20.04	29.24	33.74	36.25	23.28	23.39	23.09	31.12	35.76	32.57	24.2833	3.23322	23.2233	2.54563	21.1333	1.39908	33.0767	3.55176	23.2533	0.151767	33.15	2.37375	0.437525	0.00273411	0.149051	0.285881	-0.322168	0.0207814	0.225848	0.107478	0.514417	0.000197831	0.35884	9.78509e-05	-0.231015	0.0798979	-0.0565293	0.667075	0.278397	0.036942
FBgn0062412	Ctr1B	0.55	0.93	1.25	4.44	3.37	3.83	6.57	8.54	7.78	0.25	0.18	1.83	0.51	1.17	0.45	0	0	0.07	0.91	0.350428	3.88	0.536749	7.63	0.993529	0.753333	0.933077	0.71	0.3995	0.0233333	0.0404145	2.60009	7.97361e-11	3.42639	1.54244e-24	0.799804	0.00179496	-2.75643	5.62701e-05	-0.23057	0.822465	-4.54851	0.00370511	-4.72936	0.0121921	-7.40387	5.53169e-09	-4.9056	0.000827956
FBgn0003129	Poxm	0.07	0.06	0.21	2.21	2.14	2.1	2.91	3.44	3.15	0.22	0.35	0.22	0.26	0.33	0.27	0	0	0.02	0.113333	0.083865	2.15	0.0556776	3.16667	0.265393	0.263333	0.0750555	0.286667	0.0378594	0.00666667	0.011547	4.72251	1.38369e-25	5.12267	1.60091e-34	0.374403	0.0851136	-3.31799	3.2529e-12	1.25897	0.188384	-4.77258	0.00121361	-4.6796	0.00566685	-8.08576	7.4824e-11	-3.4264	0.0651487
FBgn0037576	Or85a	0.06	0.04	0.09	0.05	0.17	0.02	0.1	0.07	0.06	0	0	0	0	0	0.03	0	0	0	0.0633333	0.0251661	0.08	0.0793725	0.0766667	0.0208167	0	0	0.01	0.0173205	0	0	0.806482	0.665262	0.604283	0.721517	-0.24073	0.928342	-2.31784	NA	-1.66662	NA	0.0167144	NA	NA	NA	-3.14159	0.291995	-2.44483	0.414539
FBgn0037577	CG7443	0	0.09	0.45	297.4	337.56	238.85	513	428.29	487.2	2.02	2.09	6.15	21.91	13.94	18.11	0	0	0.23	0.18	0.238118	291.27	49.6397	476.163	43.4201	3.42	2.36451	17.9867	3.98643	0.0766667	0.132791	11.0917	5.52492e-94	11.6507	2.17212e-107	0.528223	9.8955e-05	-6.76316	1.55581e-49	4.28831	2.37289e-05	-7.61019	8.70838e-13	-5.32645	6.61236e-05	-12.041	8.80667e-33	-1.11113	0.693578
FBgn0040529	COX7A	929.31	624.63	689.59	671.55	686.46	608.46	700.67	753.23	635.52	702.23	721.65	683.75	544.15	535.89	538.94	382.14	401.39	394.63	747.843	160.476	655.49	41.4058	696.473	58.9671	702.543	18.9519	539.66	4.1768	392.72	9.7661	0.293481	0.138329	0.232359	0.256041	-0.0948193	0.489052	-0.17851	0.00860014	-0.0335326	0.865456	-0.606571	1.40917e-40	-1.07719	3.26237e-96	-1.30589	1.6923e-90	-1.10941	4.53899e-10
FBgn0004908	Arl2	64.93	67.66	66.11	32.84	38.02	35.23	34.69	31.2	37.71	38.89	36.51	41.39	59.55	55.59	52.93	42.8	53.05	43.97	66.2333	1.36917	35.3633	2.59257	34.5333	3.25783	38.93	2.44025	56.0233	3.33121	46.6067	5.61067	-0.408091	0.00255799	-0.594432	1.03897e-05	-0.220625	0.195745	-0.147905	0.37177	-0.705884	1.06229e-07	-0.427137	0.000660338	0.0197761	0.919446	-0.179715	0.253281	-0.691784	1.88946e-07
FBgn0037578	CG9601	61.98	72.29	65.28	26	23.56	21.58	30.81	31.88	28.34	92.04	89.46	88.35	53.04	48.22	53.25	52.48	49.23	52.3	66.5167	5.26508	23.7133	2.21399	30.3433	1.81555	89.95	1.89317	51.5033	2.84539	51.3367	1.82665	-0.991458	2.6259e-16	-0.784799	1.44429e-12	0.174311	0.204042	1.64567	4.69861e-70	0.505629	7.41934e-08	-0.147004	0.0353663	-1.04254	3.2079e-57	0.550445	1.97484e-08	-0.541537	3.15883e-10
FBgn0037579	COX7AL	16.93	14.69	21.05	0.23	0.37	0.37	0.34	0.61	0.46	0.43	0.18	0.32	0.22	0.23	0.49	0.14	0	0.12	17.5567	3.22598	0.323333	0.080829	0.47	0.135277	0.31	0.1253	0.313333	0.15308	0.0866667	0.0757188	-5.22255	4.85905e-34	-4.8579	3.68278e-36	0.339646	0.8336	-0.367852	0.829225	-5.78535	2.87232e-13	-1.77366	0.343917	-1.85673	0.419152	-2.25816	0.213306	-7.56507	5.36546e-13
FBgn0037580	DppIII	348.5	352.07	339.68	283.69	349.23	253.37	318.17	326.27	253.15	248.52	258.22	236.5	215.88	217.53	232.18	275.77	268.58	277.97	346.75	6.37769	295.43	48.9965	299.197	40.0827	247.747	10.8806	221.863	8.9725	274.107	4.91101	0.25978	0.0642057	0.130749	0.35878	-0.162132	0.410078	-0.530219	2.70284e-07	-0.41849	1.78297e-06	0.160457	7.49803e-05	-0.0901704	0.0411344	-0.670712	1.61751e-11	-0.511322	7.87668e-14
FBgn0037581	CG7352	35.24	37.46	35.46	3.62	3.27	2.8	3.41	3.2	3.07	3.56	4.82	6.21	7.99	7.19	7.16	7.32	6.88	7.46	36.0533	1.22317	3.23	0.411461	3.22667	0.171561	4.86333	1.32553	7.44667	0.470779	7.22	0.302655	-2.99237	1.77288e-86	-3.13906	1.91296e-118	-0.180179	0.568261	0.298333	0.353415	-2.85343	5.54573e-53	-0.186599	0.290321	0.355947	0.220558	0.601746	0.00567651	-2.48684	1.71832e-89
FBgn0261108	Atg13	41.48	56.21	56.23	30.52	28.32	35.33	28.16	28.23	35.15	74.07	73.57	71.41	66.63	67.43	73.89	61.92	57.42	64.13	51.3067	8.51015	31.39	3.58507	30.5133	4.01562	73.0167	1.41369	69.3167	3.98077	61.1567	3.41951	-0.200139	0.237228	-0.39539	0.0116804	-0.228679	0.225338	0.933896	1.63031e-16	0.584013	1.03426e-06	-0.322919	7.39277e-08	-0.488752	7.80639e-17	0.392359	0.00079071	0.0880805	0.499704
FBgn0020249	stck	53.95	68	63.13	81.48	75.74	77.95	94.67	94.08	94.48	78.33	75.34	76.4	94.85	95.02	98.95	111.02	110.49	117.54	61.6933	7.13433	78.39	2.89519	94.41	0.301164	76.69	1.51595	96.2733	2.31962	113.017	3.92627	0.847412	2.78411e-13	0.964011	2.25305e-20	0.0840366	0.452967	-0.312461	0.000577118	0.386082	0.000344893	0.0875695	0.130072	0.326012	4.90306e-06	-0.0387199	0.645264	0.706352	1.93746e-13
FBgn0037583	CG9684	59.56	82.25	76.91	51.04	60.5	57.24	63.54	59.47	64.86	78.96	82.37	63.66	115.76	114.8	127.28	109.34	88.65	109.13	72.9067	11.8629	56.26	4.80554	62.6233	2.80949	74.9967	9.96479	119.28	6.94481	102.373	11.8852	0.130247	0.391137	0.132895	0.337036	-0.0310717	0.865243	0.13675	0.294875	0.116959	0.446252	-0.362604	5.6665e-06	0.211876	0.0613487	0.297517	0.00567125	0.324066	0.0201046
FBgn0037584	CG7963	0.25	0.41	0.17	0.06	0.02	0	0.03	0.03	0.02	0.22	0	0	0	0	0	0	0	0	0.276667	0.122202	0.0266667	0.0305505	0.0266667	0.0057735	0.0733333	0.127017	0	0	0	0	-2.93088	0.0778539	-3.0398	0.0412012	-0.163042	NA	1.27458	NA	-1.75005	0.319117	NA	NA	-2.56634	0.587678	-1.36334	NA	-4.33919	0.0230602
FBgn0266801	CG45263	0.36	0.22	0.38	5.21	6.1	5.02	7.3	6.46	8.05	0.8	0.7	0.73	0.58	0.74	0.66	0.01	0	0	0.32	0.087178	5.44333	0.57657	7.27	0.795424	0.743333	0.051316	0.66	0.08	0.00333333	0.0057735	4.56297	7.70634e-107	4.83186	4.25603e-123	0.234777	0.125055	-3.15224	3.20578e-69	1.27114	0.000255255	-7.50252	3.42891e-09	-7.76012	1.00783e-09	-10.9621	7.62556e-20	-6.48833	9.08526e-07
FBgn0037589	Obp85a	0	0	0	0	0	0	0	0	0	0	0	0	0	0	0	0	0	0	0	0	0	0	0	0	0	0	0	0	0	0	NA	NA	NA	NA	NA	NA	NA	NA	NA	NA	NA	NA	NA	NA	NA	NA	NA	NA
FBgn0037590	Or85b	0.03	0.04	0	0.05	0	0.02	0	0	0	0	0	0	0	0	0	0	0	0	0.0233333	0.0208167	0.0233333	0.0251661	0	0	0	0	0	0	0	0	0.516763	0.883719	-2.15121	NA	-2.69631	NA	-0.609975	NA	-0.231684	NA	NA	NA	NA	NA	-1.43503	NA	-0.999269	NA
FBgn0037591	Or85c	0	0	0	0.05	0	0.07	0	0	0.04	0	0	0.15	0	0	0	0	0	0	0	0	0.04	0.0360555	0.0133333	0.023094	0.05	0.0866025	0	0	0	0	3.16031	0.473948	1.55108	NA	-1.62585	NA	-0.323374	NA	2.68214	NA	NA	NA	-1.73233	NA	-2.11207	NA	NA	NA
FBgn0037592	CG11737	40	45.12	43.73	26.61	22.45	23.81	31.96	30.42	31.43	42.89	48.04	44.07	72.97	68.25	72.91	80.53	77.21	78.84	42.95	2.64762	24.29	2.12113	31.27	0.782368	45	2.69802	71.3767	2.70794	78.86	1.66009	-0.323242	0.0113716	-0.110121	0.281754	0.180817	0.157736	0.609653	3.12261e-08	0.137834	0.158501	-0.000893836	0.989663	0.57295	9.43971e-17	1.1324	1.15931e-32	0.7073	3.57804e-23
FBgn0051454	CG31454	0.67	0.79	1.04	1	0.81	0.52	0.86	0.82	1.07	0.07	0.17	0	0.02	0.12	0	0	0	0	0.833333	0.188768	0.776667	0.24173	0.916667	0.134288	0.08	0.08544	0.0466667	0.064291	0	0	0.389151	0.447996	0.488799	0.265391	0.0688363	0.927823	-3.38888	0.00123168	-3.13809	0.00157762	-2.54481	NA	-3.37782	0.349715	-6.97888	4.9051e-07	-6.69071	8.84017e-07
FBgn0051259	CG31259	0.18	0.07	0.1	0.03	0.02	0	0.02	0.03	0.01	0	0.05	0.09	0	0	0	0	0	0	0.116667	0.0568624	0.0166667	0.0152753	0.02	0.01	0.0466667	0.0450925	0	0	0	0	-2.26046	0.181428	-2.30133	0.125287	-0.0860666	NA	1.02715	NA	-1.43386	0.396951	NA	NA	-2.92064	0.481208	-1.91728	NA	-4.23697	0.0334307
FBgn0040531	CG11741	0	0	0.11	0	0	0.09	0	0.19	0.08	0	0	0	0	0	0	0	0	0	0.0366667	0.0635085	0.03	0.0519615	0.09	0.0953939	0	0	0	0	0	0	-0.0457617	NA	1.4827	NA	1.49277	NA	0.953779	NA	0.759053	NA	NA	NA	NA	NA	0.221283	NA	0.0736518	NA
FBgn0037594	Or85d	0.4	0.16	0.44	0	0	0.02	0	0	0.02	0	0	0	0	0	0	0	0	0	0.333333	0.151438	0.00666667	0.011547	0.00666667	0.011547	0	0	0	0	0	0	-4.95859	0.0060418	-5.0257	0.00399385	-0.100077	NA	1.03155	NA	-4.07843	0.0277898	NA	NA	NA	NA	0.207706	NA	-4.85635	0.0062135
FBgn0051453	pch2	124.27	153.11	134.69	76.28	82.5	67.51	98.11	85.99	87.8	64.24	62.9	60.33	137.96	130.5	135.2	148.76	151.44	151.23	137.357	14.6038	75.43	7.53106	90.6333	6.53792	62.49	1.98698	134.553	3.77181	150.477	1.49038	-0.368005	0.00260821	-0.252956	0.0300859	0.081988	0.574544	-0.548074	6.82305e-09	-1.0644	8.78493e-25	0.0150586	0.794347	1.03046	1.8676e-56	0.431498	8.19154e-08	-0.0370684	0.693777
FBgn0051450	mRpS18A	124.83	152.72	122.2	115.06	135.45	109.03	97.09	92.5	84.57	107.35	105.51	97.89	202.69	189.29	202.02	204.4	216.1	186.91	133.25	16.9127	119.847	13.8452	91.3867	6.33382	103.583	5.01567	198	7.55052	202.47	14.6904	0.34215	0.0240312	-0.198586	0.180715	-0.574474	1.04665e-06	-0.485923	2.76746e-05	-0.291649	0.0344753	-0.119219	0.154878	0.725541	1.22683e-12	0.189156	0.0993108	0.432637	0.000797988
FBgn0051460	CG31460	95.63	77.57	82.22	30.34	29.99	26.84	40.14	33.81	32.49	27.5	26.17	25.47	52.48	45.76	48.46	56.73	55.95	58.42	85.14	9.3774	29.0567	1.92765	35.48	4.08929	26.38	1.03116	48.9	3.38154	57.0333	1.26263	-1.06162	1.69632e-10	-0.925252	3.41915e-08	0.103	0.639232	-0.420263	0.0182742	-1.63045	4.18721e-20	0.0791648	0.526942	0.880622	1.20592e-08	0.408623	0.00182009	-0.753224	6.03207e-07
FBgn0266916	Cenp-C	80.13	96.54	95.35	29.49	24.36	25.85	32.35	30.6	34.92	79.01	83.57	78.21	66.24	69.75	76.27	90.33	79.37	86.11	90.6733	9.15016	26.5667	2.63902	32.6233	2.17293	80.2633	2.89146	70.7533	5.08972	85.27	5.52807	-1.26965	2.66304e-26	-1.12495	4.67036e-28	0.112214	0.469151	1.31454	1.19284e-45	-0.104357	0.237778	0.125278	0.071873	-0.147232	0.0089123	1.11521	6.01995e-31	-0.256638	0.00454506
FBgn0261929	5-HT2B	0.17	0.19	0.2	0.02	0.01	0.02	0.07	0.09	0.08	0	0.02	0	0	0	0	0	0	0	0.186667	0.0152753	0.0166667	0.0057735	0.08	0.01	0.00666667	0.011547	0	0	0	0	-3.09391	0.000263247	-0.826504	0.139581	2.2293	0.0362475	-1.02032	NA	-4.19508	0.00366666	NA	NA	-1.84485	NA	-2.92097	0.32483	-6.04482	1.71528e-05
FBgn0026399	Or85e	0	0.07	0.03	0	0	0	0	0	0	0	0	0	0	0	0	0	0	0	0.0333333	0.0351188	0	0	0	0	0	0	0	0	0	0	-2.65116	NA	-2.72077	NA	NA	NA	NA	NA	-0.804327	NA	NA	NA	NA	NA	NA	NA	-1.58844	NA
FBgn0037601	Cyp313b1	0.22	0.39	0.38	11.04	7.87	8.98	14.13	17.63	15.29	0.77	0.48	1.09	0.21	0.26	0.25	0	0	0.03	0.33	0.0953939	9.29667	1.60855	15.6833	1.78284	0.78	0.305123	0.24	0.0264575	0.01	0.0173205	5.32178	2.66948e-71	5.92566	1.37026e-109	0.573245	0.00227337	-3.93186	1.37985e-32	1.28081	0.0364197	-4.19764	0.00767104	-5.95977	4.18367e-05	-9.88549	5.36508e-16	-4.66876	0.00175264
FBgn0024326	Mkk4	69.89	92.1	101.92	48.76	47.29	57.47	50.22	52.86	57.56	94.73	99.39	95.33	117.25	107.64	112.21	123.69	117.37	127.13	87.97	16.4095	51.1733	5.50238	53.5467	3.71787	96.4833	2.53506	112.367	4.80692	122.73	4.95031	-0.271627	0.101676	-0.360707	0.012121	-0.122165	0.511555	0.630529	6.74886e-09	0.208449	0.112046	-0.0162373	0.790243	0.11336	0.0318921	0.692113	5.03628e-11	0.315149	0.0178677
FBgn0037602	SLIRP2	25.67	23.14	20.36	18.25	21.04	17.49	22.09	22.65	18.16	8.63	8.03	11.63	11.81	11.24	9.84	9.9	10.53	8.44	23.0567	2.65598	18.9267	1.86923	20.9667	2.44672	9.43	1.92873	10.9633	1.01372	9.62333	1.07212	0.20473	0.413688	0.20261	0.41277	-0.0366711	0.919642	-1.32297	1.7473e-05	-1.26653	3.59826e-05	-0.357551	0.261209	-0.193241	0.665107	-1.56907	6.11996e-09	-1.46346	7.62542e-08
FBgn0000447	Dhod	93.73	87.38	87.69	146.41	145.6	144.42	137.87	129.58	128.16	91.96	85.02	89.9	94.86	94.13	95.27	106.8	104.66	102.86	89.6	3.58004	145.477	1.00072	131.87	5.24444	88.96	3.56421	94.7533	0.577437	104.773	1.97244	1.19314	5.68114e-26	0.899641	6.53289e-17	-0.326736	1.28922e-05	-0.990894	1.26433e-35	0.0544363	0.654747	-0.00153077	0.983114	0.00144476	0.98822	-1.04144	1.18063e-57	0.0516262	0.60774
FBgn0037603	CG11753	75.46	56.39	68.64	27.11	25.12	24.98	28.43	28.2	27.84	17.38	19.62	25.58	42.06	46.77	44.42	60	72.15	66.13	66.83	9.66299	25.7367	1.1914	28.1567	0.297377	20.86	4.2383	44.4167	2.355	66.0933	6.07508	-0.886387	5.66329e-07	-0.906975	6.35392e-08	-0.0533072	0.791498	-0.60093	0.002208	-1.63349	6.88541e-15	0.420156	0.000173781	1.44533	1.00866e-15	0.789599	2.00986e-09	-0.195804	0.279373
FBgn0259992	CG42489	19.35	19.32	15.63	2.69	2.42	1.73	2.84	2.83	2.51	2.21	0.32	1.26	1.03	0.66	0.48	0.49	0	0.2	18.1	2.13914	2.28	0.495076	2.72667	0.187705	1.26333	0.945004	0.723333	0.280416	0.23	0.246374	-2.50666	1.37854e-13	-2.38958	1.31696e-14	0.0824389	0.925413	-1.10111	0.244269	-3.73586	8.28179e-12	-1.67287	0.291244	-2.59772	0.129527	-3.72419	0.00159251	-6.29991	4.10904e-12
FBgn0263231	bel	255.8	303.13	295.85	336.22	385.21	293.84	342.27	349.39	280.82	284.37	303.34	285.72	209.69	213.92	220.55	249.19	245.19	264.84	284.927	25.4857	338.423	45.7248	324.16	37.702	291.143	10.5842	214.72	5.47402	253.073	10.3846	0.744828	1.14504e-10	0.534478	6.84436e-06	-0.242947	0.105671	-0.494428	1.60205e-08	0.101631	0.204718	0.0926591	0.0324748	-0.436588	1.91622e-26	-0.98266	9.89595e-30	-0.339592	6.36526e-06
FBgn0086679	p	79.66	85.04	87.44	21.98	24.93	19.53	32.67	31.77	27.32	36.46	38.07	35.92	25.83	26.4	28.19	33.67	33.8	36.03	84.0467	3.98398	22.1467	2.70386	30.5867	2.86458	36.8167	1.1185	26.8067	1.23144	34.5	1.32661	-1.42851	1.07272e-38	-1.11206	5.0164e-27	0.283626	0.0417734	0.456132	1.13871e-05	-1.12064	1.89207e-45	0.219987	0.00132896	-0.329069	9.6783e-06	0.0756086	0.487688	-1.45412	8.56127e-93
FBgn0037606	CG8032	16.98	21.08	21.26	20.74	19.37	19.48	18.11	18.97	17.46	45.82	45.75	49.57	39.28	37.53	37.8	40.97	36.37	42.24	19.7733	2.42077	19.8633	0.761205	18.18	0.75743	47.0467	2.18555	38.2033	0.942143	39.86	3.08841	0.509002	3.6061e-05	0.229821	0.0671015	-0.311581	0.00326099	0.961269	3.61807e-25	1.32112	3.3395e-34	-0.0776737	0.32515	-0.46693	4.95571e-08	0.441488	3.48419e-06	0.846197	5.59487e-14
FBgn0037607	CG8036	170.62	176.89	176.52	972.38	989.31	823.34	705.65	686.33	648.88	382.62	399.66	379.47	515.4	531.08	515.83	573.32	584.14	589.28	174.677	3.51804	928.343	91.3287	680.287	28.8635	387.25	10.8622	520.77	8.93131	582.247	8.14671	2.90426	5.80431e-190	2.30683	3.22519e-175	-0.630311	5.12142e-14	-1.53956	6.43041e-103	1.2161	8.65348e-67	0.0156079	0.741863	0.353271	1.22118e-20	-1.23743	1.36852e-68	1.56574	1.88155e-163
FBgn0037608	mRpL19	144.66	122.68	128.41	84.94	99.82	72.03	77.73	73.27	62.71	79.62	76	70.63	63.04	63.48	64.92	61.21	72.1	69.61	131.917	11.4019	85.5967	13.9066	71.2367	7.71368	75.4167	4.5233	63.8133	0.983328	67.64	5.70602	-0.136761	0.431287	-0.549415	0.000182813	-0.446108	0.00308851	-0.456784	0.00033511	-0.741917	5.67142e-08	-0.0662803	0.493042	-0.39748	0.000279622	-0.904433	1.66803e-12	-1.14081	1.95084e-17
FBgn0037609	CG9773	82.84	69.75	85.22	26.57	23.89	24.63	24.82	26.49	25.07	43.57	45.83	45.2	72.68	70.78	76.48	64.98	65.39	68.63	79.27	8.33	25.03	1.38405	25.46	0.900722	44.8667	1.16629	73.3133	2.9023	66.3333	1.99951	-1.16849	5.64473e-16	-1.29417	1.20113e-21	-0.15823	0.297791	0.561396	4.97422e-06	-0.757101	3.74298e-08	-0.288737	4.86943e-05	0.330793	0.00091743	0.840336	8.55021e-16	-0.431235	0.000772844
FBgn0037610	CG8043	46.59	46.52	46.73	26.22	24.38	20.55	23.21	21.01	21.51	32.35	35.42	37.52	34.58	31.74	32.8	38.99	43.81	41.38	46.6133	0.106927	23.7167	2.89262	21.91	1.15326	35.0967	2.60012	33.04	1.43513	41.3933	2.41003	-0.482173	0.00049309	-0.745088	3.05151e-11	-0.295637	0.0359468	0.28469	0.0443757	-0.346983	0.003589	0.173752	0.0712076	0.00395128	0.979129	0.236779	0.0755267	-0.347845	0.000905797
FBgn0037611	CG11755	50.07	68.21	57.88	17.21	19.21	18.99	16.9	17.92	18.81	35.44	35.06	37.19	45.57	45.88	46.05	33.49	28.17	32.1	58.72	9.09913	18.47	1.09672	17.8767	0.955737	35.8967	1.13606	45.8333	0.243379	31.2533	2.75921	-1.16527	1.07761e-13	-1.36416	2.67021e-19	-0.232859	0.194916	0.673044	6.85233e-06	-0.640212	1.84135e-05	-0.685766	2.39592e-11	-0.423752	0.00356783	0.19678	0.203823	-1.07023	3.23692e-13
FBgn0053325	CG33325	4.85	3.48	4.24	0	0	0	0.03	0.03	0	0	0	0	0	0	0	0	0	0	4.19	0.686367	0	0	0.02	0.0173205	0	0	0	0	0	0	-9.1881	1.00418e-12	-7.39568	4.76014e-11	1.82262	NA	NA	NA	-7.34366	1.10155e-08	NA	NA	NA	NA	NA	NA	-8.10932	1.8243e-10
FBgn0265158	CG44227	0	0	0	0	0	0	0	0	0	0	0	0	0	0	0	0	0	0	0	0	0	0	0	0	0	0	0	0	0	0	NA	NA	NA	NA	NA	NA	NA	NA	NA	NA	NA	NA	NA	NA	NA	NA	NA	NA
FBgn0001180	hb	0.09	0.18	0.13	14.58	14.02	16.36	10.61	11.74	15.03	98.41	112.29	113.01	39.75	40.46	42.97	60.65	65.02	61.02	0.133333	0.0450925	14.9867	1.22186	12.46	2.29628	107.903	8.22935	41.06	1.69177	62.23	2.42328	7.32214	1.12624e-131	6.90225	1.36021e-103	-0.452409	0.0146453	2.56317	9.06995e-140	9.73646	1.42656e-277	0.452279	2.63833e-14	-1.02883	2.48927e-46	1.48434	3.15603e-47	8.70349	2.812e-225
FBgn0037613	Cks85A	183.66	210.24	190.73	41.31	49.27	41.94	64.67	58.84	49.99	38.08	35.55	40.08	67.26	64.41	66.19	60.83	71.56	65.26	194.877	13.7666	44.1733	4.42507	57.8333	7.39159	37.9033	2.27016	65.9533	1.43966	65.8833	5.39209	-1.64458	1.38186e-42	-1.40842	1.23414e-27	0.203413	0.256771	-0.507024	0.000321283	-2.30146	1.93117e-85	-0.157341	0.126547	0.564119	7.41871e-05	0.00476466	0.972279	-1.74251	5.13707e-60
FBgn0037612	CG8112	9.71	5.48	5.88	31.07	33.65	25.52	29.52	29.39	26.38	38.72	39.75	33.88	65.79	62.71	64.17	81.52	85	84.31	7.02333	2.3353	30.08	4.15443	28.43	1.77654	37.45	3.13431	64.2233	1.54069	83.61	1.84258	2.57379	2.61852e-25	2.34614	2.17839e-22	-0.262248	0.0636744	0.0430051	0.768928	2.46712	8.0928e-24	0.233737	2.08113e-05	0.916638	6.519e-30	0.911263	6.2428e-19	3.38904	4.42892e-49
FBgn0037614	TMEM216	30.4	41.63	39.62	62.21	56.8	70.7	55.48	64.05	65.41	225.32	246.03	228.97	285.28	268.82	277.23	255.07	214.81	267.48	37.2167	5.98834	63.2367	7.00664	61.6467	5.38361	233.44	11.0549	277.11	8.23066	245.787	27.5348	1.27243	7.80383e-17	1.08193	6.31771e-15	-0.223573	0.186564	1.59939	1.70572e-51	2.72238	4.78083e-131	-0.316866	1.08605e-05	-0.15972	0.038255	1.38784	3.99994e-32	2.55679	1.77226e-87
FBgn0037615	CG11760	1.51	3.36	2.11	4.67	1.96	1.85	1.79	2.19	1.53	1.13	1.07	0	0.2	0.52	0.75	0	0.23	0	2.32667	0.94384	2.82667	1.59732	1.83667	0.332466	0.733333	0.635793	0.49	0.276225	0.0766667	0.132791	0.788764	0.0943781	0.0189176	0.964151	-0.798596	0.0958574	-2.18918	0.0874104	-1.51127	0.0316661	-3.39843	0.00843902	-3.72243	0.252315	-6.21176	3.40598e-05	-5.81272	3.39012e-09
FBgn0037616	CG8136	15.2	5.8	12.95	1.12	1.08	0.64	0.96	1.1	1.12	1.14	0.73	2.06	0.37	0.59	0.4	2.71	3.66	1.63	11.3167	4.90824	0.946667	0.266333	1.06	0.087178	1.31	0.681102	0.453333	0.119304	2.66667	1.01569	-3.10567	1.49483e-15	-3.07732	2.84235e-17	-0.00599102	0.994583	0.154304	0.812036	-3.11147	2.29795e-11	2.38775	8.76802e-08	0.821026	0.159389	0.918401	0.0472986	-2.28831	1.19351e-07
FBgn0037617	nom	26.13	31.69	30.26	21.55	20.57	19.75	28.1	23.39	29.54	13.15	14.03	13.7	10.66	13.15	11.54	15.78	18.91	16.3	29.36	2.8872	20.6233	0.901184	27.01	3.21663	13.6267	0.44456	11.7833	1.26271	16.9967	1.67727	-0.0102277	0.944267	0.228613	0.120899	0.205772	0.191258	-0.877728	7.77199e-11	-1.03706	1.94335e-15	0.372075	0.0144878	0.0747754	0.681318	-0.856974	1.41399e-10	-0.969582	2.23817e-13
FBgn0037618	ouib	2.32	4.95	4.32	0.11	0.1	0.11	0.27	0.32	0.24	0	0.09	0.16	0	0	0	0	0	0	3.86333	1.37318	0.106667	0.0057735	0.276667	0.0404145	0.0833333	0.0802081	0	0	0	0	-4.65203	1.88931e-15	-3.43037	3.10747e-13	1.18739	0.335061	-0.786678	0.723004	-5.6373	7.63236e-07	NA	NA	-2.71629	0.522329	-3.48816	0.172039	-8.23882	1.78895e-10
FBgn0037619	CG8159	15.82	16.59	14.92	8.75	7.69	7.29	9.45	8.02	8.99	13.56	16.1	14.21	29.51	27.84	28.54	29.11	31.33	29.71	15.7767	0.835843	7.91	0.754453	8.82	0.73	14.6233	1.31948	28.63	0.83863	30.05	1.14839	-0.502642	0.00403209	-0.494946	0.00219793	-0.0250674	0.930684	0.610791	0.00076572	-0.0393034	0.824363	-0.08132	0.42656	0.797782	1.5629e-08	1.35906	1.79051e-23	0.755163	6.4827e-10
FBgn0037620	ranshi	28.29	26.94	27.08	7.92	7.21	7.22	7.45	8.18	6.61	19.42	20.35	20.57	38.82	34.37	38.91	36.29	33.85	33.12	27.4367	0.742316	7.45	0.407063	7.41333	0.785642	20.1133	0.610437	37.3667	2.59558	34.42	1.66009	-1.38774	4.38431e-19	-1.54479	1.77308e-22	-0.19007	0.446877	1.15187	2.06708e-12	-0.384794	0.00809095	-0.264519	0.00796103	0.542403	4.31573e-05	1.64262	9.68237e-35	0.153145	0.21658
FBgn0037621	M1BP	68.74	71.02	66.31	37.26	40.61	30.88	41.87	42.2	35.62	35.31	40.94	40.11	44.87	42.48	47.53	53.38	56.97	57.29	68.69	2.3554	36.25	4.94301	39.8967	3.70738	38.7867	3.03935	44.96	2.5262	55.88	2.17097	-0.430395	0.00168607	-0.440243	0.000430153	-0.0429041	0.852185	-0.181457	0.176046	-0.759996	1.2773e-11	0.16677	0.0309894	0.293286	0.00363262	0.0599865	0.619182	-0.470786	3.51358e-07
FBgn0037622	CG8202	21.26	25.5	24.6	18.16	14.39	15.35	17.6	18.63	17.37	26.32	28.04	25.38	34.2	34.59	36.19	41.78	39.88	42.2	23.7867	2.23395	15.9667	1.95919	17.8667	0.670994	26.58	1.34893	34.9933	1.05453	41.2867	1.23618	-0.0746648	0.635972	-0.0632284	0.602723	-0.0205173	0.927842	0.456731	0.000256629	0.23365	0.0263793	0.09521	0.112119	0.397874	5.4223e-08	0.804381	7.10332e-13	0.628036	2.48458e-13
FBgn0037623	CG9801	13.42	18.62	19.33	6.88	6.07	7.23	7.08	7.43	9.08	9.03	8.04	5	27.13	26.7	28.62	27.17	23.07	30	17.1233	3.22677	6.72667	0.595007	7.86333	1.0681	7.35667	2.1001	27.4833	1.00759	26.7467	3.48434	-0.839839	5.94273e-07	-0.766562	8.68735e-06	0.0402731	0.889795	-0.140642	0.569524	-1.13111	5.33816e-07	-0.178181	0.0601696	1.61361	8.46564e-19	1.42505	2.1964e-26	0.479753	0.00282981
FBgn0037624	CG8223	145.96	209.43	182.93	106.73	117.58	121.42	121.79	128.31	141.66	285.32	312.6	280.09	362.58	343.09	357.87	446.81	439.04	440.06	179.44	31.8786	115.243	7.61866	130.587	10.1288	292.67	17.4569	354.513	10.1693	441.97	4.22248	-0.134038	0.392883	-0.105604	0.502392	-0.00527087	0.980328	1.06249	1.39775e-35	0.7795	4.60132e-10	0.173	2.74304e-06	0.358965	5.75621e-15	1.3715	2.33893e-75	1.13501	3.072e-21
FBgn0083971	CG34135	0.48	0.91	0.83	1.5	1.54	1.8	1.66	1.87	1.7	1.15	1.16	0.67	0.17	0.25	0.17	0.05	0.19	0.08	0.74	0.228692	1.61333	0.162891	1.74333	0.111505	0.993333	0.28006	0.196667	0.046188	0.106667	0.0737111	1.63506	8.37489e-08	1.59399	2.56216e-08	-0.0733438	0.840337	-0.958279	0.00335593	0.521858	0.201067	-1.07385	0.0960825	-3.51409	1.73329e-10	-4.57914	2.86169e-28	-3.00063	7.19631e-08
FBgn0037625	CG11768	0.07	0.21	0.15	0.05	0.02	0.08	0.05	0.01	0.05	0.15	0.17	0.15	0.17	0.18	0.17	0.05	0.19	0.08	0.143333	0.0702377	0.05	0.03	0.0366667	0.023094	0.156667	0.011547	0.173333	0.0057735	0.106667	0.0737111	-1.0259	0.270047	-1.59348	0.0572761	-0.595221	0.701339	1.37647	0.117604	0.179286	0.797473	-0.870431	0.175084	-0.821436	0.330333	0.525538	0.6054	-0.631741	0.437443
FBgn0037626	CG8236	0.19	0.27	0.53	0.02	0	0	0	0.04	0	0	0	0	0	0	0	0	0	0	0.33	0.177764	0.00666667	0.011547	0.0133333	0.023094	0	0	0	0	0	0	-5.28706	0.00189246	-4.45662	0.00442352	0.807716	NA	1.03155	NA	-4.40957	0.0110508	NA	NA	NA	NA	0.200576	NA	-5.19887	0.00183297
FBgn0037627	CG13318	0.75	0.53	0.51	0	0.05	0	0.1	0.13	0.14	0	0	0	0.03	0.03	0	0	0	0	0.596667	0.133167	0.0166667	0.0288675	0.123333	0.0208167	0	0	0.02	0.0173205	0	0	-4.47231	0.000904345	-1.94548	0.0148423	2.53122	0.295414	-0.216173	NA	-4.96599	0.00139475	-0.927858	NA	NA	NA	-1.03992	NA	-5.74144	0.000124682
FBgn0085330	CG34301	13.81	11.11	11.24	0.13	0.18	0.52	1.63	0.9	0.92	0	0	0	0	0	0	0	0	0	12.0533	1.52271	0.276667	0.212211	1.15	0.415812	0	0	0	0	0	0	-4.93364	3.59793e-12	-3.07098	2.56766e-10	1.83912	0.212686	-1.84442	NA	-6.93218	9.77161e-08	NA	NA	NA	NA	-2.51051	0.453688	-7.55283	4.28944e-09
FBgn0261015	Pif1A	1.22	0.94	1.71	17.72	17.06	13.88	20.49	19.02	18.98	1.71	1.34	1.73	1.22	1.17	1.16	0	0	0	1.29	0.389744	16.22	2.05319	19.4967	0.860484	1.59333	0.219621	1.18333	0.0321455	0	0	4.14194	7.8787e-100	4.25783	1.93371e-121	0.0844202	0.585697	-3.64334	3.85194e-136	0.360505	0.212887	-9.1477	2.14414e-13	-9.66499	7.89054e-15	-13.3483	1.01119e-28	-9.30817	1.09155e-13
FBgn0046874	Pif1B	3.35	2.74	5.22	17.5	16.82	13.66	20.24	19.1	19.07	1.57	1.28	1.76	1.22	1.55	1.16	0	0	0	3.77	1.29225	15.9933	2.04913	19.47	0.667008	1.53667	0.24173	1.31	0.21	0	0	2.58522	2.79349e-34	2.7196	8.8074e-42	0.102429	0.485219	-3.68357	4.34135e-136	-1.23364	8.92499e-06	-9.33399	8.43544e-14	-9.6504	9.28398e-15	-13.3677	8.47694e-29	-10.8884	1.41094e-18
FBgn0053191	CG33191	0.02	0.06	0.07	0.04	0.06	0.08	0.14	0.02	0.09	0	0	0	0	0	0	0	0	0	0.05	0.0264575	0.06	0.02	0.0833333	0.0602771	0	0	0	0	0	0	0.735283	0.673576	0.953086	0.573444	0.184267	0.942739	-2.29162	NA	-1.70967	NA	NA	NA	NA	NA	-3.12095	0.273328	-2.49734	0.40185
FBgn0053189	CG33189	0.18	0	0.06	0.3	0.28	0.2	0.24	0.09	0.2	0	0.16	0	0	0	0	0	0	0	0.08	0.0916515	0.26	0.052915	0.176667	0.0776745	0.0533333	0.092376	0	0	0	0	2.16948	0.203253	1.45694	0.447587	-0.750665	0.675207	-2.13894	0.352926	-0.104189	NA	NA	NA	-1.70254	NA	-3.89349	0.0895376	-1.80014	NA
FBgn0037630	Ir85a	0.14	0.08	0.2	0.05	0.03	0.01	0.03	0	0	0	0	0	0	0	0	0	0	0	0.14	0.06	0.03	0.02	0.01	0.0173205	0	0	0	0	0	0	-1.85562	0.166684	-3.67893	0.038378	-1.83118	NA	-1.68685	NA	-3.68049	0.0619301	NA	NA	NA	NA	-2.52681	0.454015	-4.47415	0.0165992
FBgn0037632	CCT7	284.78	288.52	261.57	468.02	540.16	453.5	406.65	420.98	383.26	336.68	342.88	328.67	443.94	437.11	435.72	433.55	434.4	434.01	278.29	14.6002	487.227	46.4129	403.63	19.0405	336.077	7.12419	438.923	4.3998	433.987	0.42548	1.29985	2.60038e-28	0.879517	1.17289e-15	-0.453993	1.20766e-06	-0.814255	2.73155e-29	0.33766	0.000595165	-0.161831	6.84798e-06	0.133224	0.000849677	-0.731607	8.63053e-27	0.46841	3.79012e-08
FBgn0037633	CG9839	39.34	44.4	41.11	40.15	31.84	36.03	31.88	25.95	31.87	18.09	18.2	17.74	13.89	16.08	14.8	10.87	11.36	11.08	41.6167	2.56777	36.0067	4.15505	29.9	3.4208	18.01	0.240208	14.9233	1.1002	11.1033	0.245832	0.290206	0.0461059	-0.131241	0.345335	-0.453938	0.00197208	-1.28021	4.63438e-23	-1.13819	3.47922e-26	-0.575718	6.78983e-07	-0.937015	4.3038e-14	-2.26815	3.50612e-67	-2.08025	2.18177e-93
FBgn0037634	hng2	22.71	28.3	24.27	15.1	13.84	14.96	16.23	12.73	14.48	20.53	16.07	19.99	34.87	36.39	38.81	37.22	37.62	37.54	25.0933	2.88452	14.6333	0.690604	14.48	1.75	18.8633	2.43412	36.69	1.98706	37.46	0.21166	-0.277364	0.0898548	-0.446197	0.00575692	-0.201381	0.297417	0.0805603	0.687903	-0.345198	0.0485352	-0.117163	0.218604	0.761319	2.26053e-07	0.788409	3.56834e-11	0.409903	0.000649934
FBgn0037635	CG9837	4.45	6.34	6.13	1.98	1.65	1.16	2.69	3.39	3.18	2.63	4.02	3.32	1.21	0.76	0.73	0	0.18	0.08	5.64	1.03591	1.59667	0.412593	3.08667	0.359212	3.32333	0.695006	0.9	0.268887	0.0866667	0.090185	-1.32636	2.25182e-05	-0.510138	0.0544602	0.783071	0.0297928	0.785986	0.0482794	-0.687392	0.0183266	-4.06016	0.0010338	-6.07473	3.02222e-08	-5.31822	3.21119e-06	-6.78853	4.91434e-11
FBgn0037636	CG9821	88.75	169.94	150.16	155.16	127.4	186.78	114.61	126.05	164.98	423.12	487.57	410.46	406.81	420.11	445.69	431.94	349.99	430.71	136.283	42.3365	156.447	29.7109	135.213	26.4057	440.383	41.3522	424.203	19.7606	404.213	46.9628	0.716378	0.00206696	0.349511	0.143565	-0.400015	0.0676885	1.20539	4.10076e-18	1.77197	4.99261e-20	-0.214957	0.00519285	-0.358672	7.62058e-06	0.795684	6.26465e-08	1.40715	7.40684e-12
FBgn0040532	CG8369	1.93	2.18	2.84	3	5.07	3.43	7.69	6.23	8.33	3.43	3.72	3.27	1.63	3.12	2.15	0	0	0	2.31667	0.470142	3.83333	1.09235	7.41667	1.07635	3.47333	0.228108	2.3	0.756241	0	0	1.23224	0.00477337	2.03099	7.982e-10	0.762737	0.0629474	-0.419472	0.478212	0.661377	0.180729	-6.2994	1.11039e-05	-6.98707	1.07747e-06	-7.45819	3.20024e-08	-6.33302	3.69885e-06
FBgn0037637	IscU	347.9	336.78	389.84	80.5	84.07	70.41	100.55	92.94	83.32	66.01	62.54	70.32	71.5	68.73	70.53	82.29	70	86.48	358.173	27.9821	78.3267	7.08459	92.27	8.63452	66.29	3.89755	70.2533	1.40557	79.59	8.56534	-1.69729	9.59357e-57	-1.6111	1.11358e-49	0.0534774	0.766867	-0.523073	8.62248e-07	-2.36951	7.92134e-110	0.0436105	0.660838	0.0375981	0.768319	-0.536898	4.1629e-07	-2.33699	9.21193e-102
FBgn0037638	CG8379	37.02	38.33	43.07	27.51	30.68	28.59	38.55	37.58	34.76	46.96	53.43	52.66	60.12	58.13	60.83	73.96	73.64	77.83	39.4733	3.18293	28.9267	1.61159	36.9633	1.96882	51.0167	3.53421	59.6933	1.39965	75.1433	2.33222	0.0506328	0.674628	0.252283	0.0136891	0.168377	0.142351	0.536241	4.55902e-09	0.437422	1.37128e-05	0.188058	0.000197536	0.326473	5.69411e-06	0.810696	1.28181e-28	0.758297	3.13879e-19
FBgn0262614	pyd	11.96	16.48	16.42	70.86	65.86	65.31	84.4	81.58	85.73	97.31	97.91	95.44	53.77	57.94	60.68	68.78	67.77	71.16	14.9533	2.59248	67.3433	3.05791	83.9033	2.11911	96.8867	1.28827	57.4633	3.47957	69.2367	1.74053	2.67622	1.88775e-101	2.84169	1.13959e-123	0.13312	0.116003	0.244406	0.000321845	2.77082	1.99621e-127	0.124164	0.0273472	-0.719582	2.07757e-76	-0.526755	8.48532e-17	2.04575	6.6785e-67
FBgn0003015	osk	3.42	3.75	3.16	1112.26	1077.91	1155.73	691.69	742.06	714.4	1030.46	1038.68	1103.53	851.07	937.6	923.68	820.13	760.15	862.52	3.44333	0.295691	1115.3	38.999	716.05	25.2255	1057.56	40.0256	904.117	46.464	814.267	51.4363	8.83886	0	8.04807	0	-0.82458	3.60144e-23	-0.359119	1.06761e-06	8.33254	0	-0.296475	1.72885e-07	-0.612515	5.40238e-33	-1.02246	8.06035e-46	7.71655	0
FBgn0037643	ScsbetaA	253.77	326.58	301.68	155.88	159.35	167.3	199.23	209.91	208.7	192.75	190.54	178.77	235.94	230.01	240.74	248.81	228.72	234.55	294.01	37.006	160.843	5.85462	205.947	5.84818	187.353	7.51507	235.563	5.37491	237.36	10.3356	-0.367276	0.00203635	-0.162913	0.163148	0.17121	0.0984389	-0.0609058	0.50661	-0.577279	1.24065e-08	-0.133319	0.00355749	0.105243	0.0635051	-0.00637449	0.937987	-0.476085	8.86148e-07
FBgn0037644	CG11964	102.11	98.17	94.04	58.49	57.05	46.73	56.52	55.45	46.32	59.44	57.25	54.9	57.47	56.77	59.38	82.38	77.05	78.75	98.1067	4.03537	54.09	6.41448	52.7633	5.60568	57.1967	2.27047	57.8733	1.35094	79.3933	2.72262	-0.368475	0.00657253	-0.55316	2.2575e-05	-0.217222	0.147496	-0.195487	0.0765652	-0.712217	1.11683e-10	0.311827	1.09464e-08	0.236555	0.00115367	-0.010295	0.923012	-0.478532	3.68262e-07
FBgn0286204	ich	0.12	0.28	0.34	0.26	0.4	0.26	0.97	0.98	1.23	0	0.06	0.11	0.1	0.06	0.13	0.42	0.2	0.29	0.246667	0.113725	0.306667	0.080829	1.06	0.147309	0.0566667	0.0550757	0.0966667	0.0351188	0.303333	0.110604	0.836173	0.143496	2.47517	3.08535e-10	1.60015	4.19729e-07	-2.75376	0.00286352	-2.05745	0.0440565	1.50599	0.0165612	2.2151	0.0365665	-0.562919	0.310167	0.160555	0.79968
FBgn0037646	CAHbeta	2.68	2.56	3.32	13.58	11.21	10.34	6.19	7.93	7.35	23.61	23.59	23.13	22.18	22.59	23.8	28.66	34.35	33.56	2.85333	0.408575	11.71	1.67687	7.15667	0.885965	23.4433	0.271539	22.8567	0.842279	32.19	3.08248	2.53303	9.17816e-30	1.67794	6.67106e-12	-0.887754	6.26857e-06	0.724858	2.39351e-05	3.10446	1.12376e-60	0.343386	0.00334114	0.219002	0.165925	0.892716	5.27014e-08	3.31916	1.16238e-72
FBgn0037647	RagA-B	63.41	75.55	68.53	33.45	36.52	33.16	40.69	40.53	40.54	48.12	47.95	46.94	34.8	35.67	35.72	39.06	38.64	38.62	69.1633	6.09473	34.3767	1.86184	40.5867	0.0896289	47.67	0.637887	35.3967	0.517333	38.7733	0.248462	-0.510025	7.94031e-06	-0.42093	7.72757e-05	0.055257	0.691366	0.192208	0.0631773	-0.466096	7.77675e-06	-0.0152534	0.871744	-0.534751	3.18527e-09	-0.393912	1.42717e-05	-1.00472	6.48594e-27
FBgn0027503	CG11970	29.28	30.91	31.82	20.14	22.05	18.86	20.47	20.02	20.18	34.28	39.49	35.57	17.37	18.6	19.46	20.22	18.79	19.99	30.67	1.2869	20.35	1.60533	20.2233	0.228108	36.4467	2.71338	18.4767	1.05044	19.6667	0.767876	-0.0952988	0.371225	-0.25392	0.00259604	-0.192213	0.0391736	0.56199	4.56714e-11	0.317681	0.0003567	-0.0533643	0.487389	-1.12443	3.47314e-60	-0.61364	2.61808e-15	-0.810401	2.70451e-30
FBgn0260243	E(var)3-9	66.62	76.6	79.13	38.07	35.65	34.96	37.03	39.47	38.14	123.25	125.41	122.76	201.51	185.54	200.65	199.57	196.35	211.65	74.1167	6.6144	36.2267	1.63323	38.2133	1.22165	123.807	1.40998	195.9	8.98232	202.523	8.06623	-0.532468	1.2232e-07	-0.605641	3.36439e-10	-0.105872	0.364343	1.49327	6.36966e-93	0.811136	3.62981e-24	-0.0959783	0.0609212	0.475976	1.51612e-22	1.91722	4.08288e-176	1.28167	1.15439e-62
FBgn0037648	CG11975	72.85	79.97	78.33	29.54	29.77	26.23	34.69	35	30.72	36.52	36.17	38.98	48.41	48.78	49.46	52.66	57.55	55.1	77.05	3.72859	28.5133	1.98077	33.47	2.38661	37.2233	1.53135	48.8833	0.532572	55.1033	2.445	-0.937785	6.53474e-20	-0.856639	1.96536e-16	0.0483085	0.788375	0.102297	0.39727	-0.984835	1.01282e-24	0.0223821	0.795611	0.332724	0.00121287	0.38274	8.8615e-05	-0.657451	4.19326e-15
FBgn0051100	CG31100	1.74	1.65	2.09	0.86	0.87	0.5	1.67	1.58	1.17	0.39	0.3	0.13	0.12	0.13	0.18	0.03	0	0	1.82667	0.232451	0.743333	0.210792	1.47333	0.266521	0.273333	0.132035	0.143333	0.0321455	0.01	0.0173205	-0.800288	0.0255983	0.0322177	0.922705	0.80191	0.0402058	-1.66749	0.0115921	-2.60408	1.71624e-07	-3.69348	0.0284525	-4.7591	0.00515544	-6.50534	1.1634e-06	-7.4075	3.9003e-09
FBgn0037650	CG11977	0.41	0.34	0.39	0.04	0.05	0.03	0.04	0	0	0	0	0	0	0	0	0	0	0	0.38	0.0360555	0.04	0.01	0.0133333	0.023094	0	0	0	0	0	0	-2.71289	0.054661	-4.64246	0.00976929	-1.95349	NA	-0.81777	NA	-3.69303	0.0548889	NA	NA	NA	NA	-1.62561	NA	-4.45301	0.0142686
FBgn0037652	CG11980	94.92	110.47	97.34	200.2	264.12	189.91	172.48	165.49	140	181.36	176.32	171.79	216	203.02	214.3	218.68	207.36	198.88	100.91	8.36716	218.077	40.2053	159.323	17.0956	176.49	4.78726	211.107	7.05465	208.307	9.93389	1.60516	7.49839e-29	1.00441	2.75196e-16	-0.634161	1.73294e-05	-0.581202	5.76866e-07	0.876422	1.28226e-19	-0.165146	0.00447476	0.0026334	0.975155	-0.628749	6.32605e-08	0.875869	4.34449e-22
FBgn0026380	Prosbeta3	391.35	408.31	400.6	237.97	276.18	228.39	260.27	265.5	234.41	262.05	259.44	236.33	292.95	294.24	296.01	363.11	385.32	354.77	400.087	8.49164	247.513	25.2839	253.393	16.6467	252.607	14.1563	294.4	1.53626	367.733	15.791	-0.198333	0.0788583	-0.313638	0.00177211	-0.148676	0.254778	-0.247506	0.00777211	-0.594252	2.29216e-11	0.173176	0.00176393	0.303799	1.61579e-05	0.00589008	0.949928	-0.293872	0.000143211
FBgn0037653	CG11982	94.02	92.1	90.75	49.54	44.89	43.07	58.35	57.59	50.49	52.56	54.62	60.58	85.29	83.09	83.03	98.81	100.76	102.92	92.29	1.64326	45.8333	3.33656	55.4767	4.33527	55.92	4.16505	83.8033	1.28784	100.83	2.05589	-0.515831	1.42878e-05	-0.391163	0.000769739	0.0922632	0.54703	0.00328801	0.978531	-0.660755	1.08591e-09	0.121109	0.0300628	0.621542	1.00687e-14	0.571449	8.91547e-12	-0.0452806	0.604665
FBgn0037654	CG11983	28.75	39.09	35.06	1.2	1.04	1.18	1.6	1.42	1.99	1.79	1.13	1.68	3.17	3.3	4.34	3.06	2.76	3.32	34.3	5.21173	1.14	0.087178	1.67	0.291376	1.53333	0.353601	3.60333	0.641275	3.04667	0.280238	-4.41141	2.57826e-126	-4.00719	2.87533e-105	0.365287	0.392897	0.13394	0.792934	-4.43881	4.84801e-73	-0.37814	0.151061	0.775281	0.0552265	0.856524	0.00631453	-3.64623	1.18525e-94
FBgn0037655	Kcmf1	129.27	130.53	143.77	68.84	59.69	53.95	76.7	78.28	68.83	127.29	136.52	129	207.57	197.39	202.54	262.95	273.09	270.38	134.523	8.03259	60.8267	7.5098	74.6033	5.06188	130.937	4.91032	202.5	5.09012	268.807	5.2499	-0.648843	5.60503e-08	-0.503708	2.82115e-07	0.113128	0.476449	0.827466	1.80915e-18	0.0292324	0.739007	0.263015	2.71409e-10	0.802308	2.27426e-62	1.57886	2.8569e-66	0.827715	1.32238e-29
FBgn0040534	Sf3b5	179.31	205.6	172.91	113.36	151.55	85.53	137.5	132.43	85.82	127.9	126.22	117.59	206.18	189.92	207.26	207.38	190.39	190.02	185.94	17.3242	116.813	33.1452	118.583	28.4869	123.903	5.53166	201.12	9.7145	195.93	9.91772	-0.181895	0.416175	-0.306153	0.148489	-0.156517	0.673749	-0.186761	0.374846	-0.514273	9.97155e-05	-0.181984	0.03146	0.42301	0.000125954	0.18639	0.345485	-0.093996	0.439278
FBgn0037656	CG11986	55.34	69.57	59.58	23.16	25.05	20.2	25.93	24.42	23.86	33.81	34.54	33.64	45.35	37.31	40.48	43.74	48.22	45.63	61.4967	7.30605	22.8033	2.44459	24.7367	1.07072	33.9967	0.478156	41.0467	4.04984	45.8633	2.2491	-0.934434	1.04384e-11	-0.966313	5.11703e-15	-0.0654301	0.725203	0.29859	0.0214999	-0.783714	1.91416e-10	0.0112005	0.930923	0.193049	0.0937498	0.440755	0.000156251	-0.594039	3.10283e-07
FBgn0264075	tgo	67.58	69.39	77.23	34.85	36.28	34.03	44.1	44.25	43.8	71.07	75.99	67.73	59.87	60.24	60.65	78.61	80.95	80.98	71.4	5.1294	35.0533	1.1387	44.05	0.229129	71.5967	4.15511	60.2533	0.390171	80.18	1.35974	-0.527867	1.0918e-08	-0.348934	6.76644e-05	0.145568	0.0810729	0.751842	1.51782e-23	0.0739371	0.441087	0.265662	1.11635e-08	-0.074664	0.26406	0.626613	4.80183e-24	-0.00361119	0.965506
FBgn0002932	neur	22.35	46.84	45.68	11.07	13.26	16.21	14.74	15.46	21.15	29.31	29.05	29.22	53.82	53.03	56.16	59.4	53.93	58.24	38.29	13.8166	13.5133	2.57935	17.1167	3.51147	29.1933	0.132035	54.3367	1.62771	57.19	2.8822	-0.983086	0.000141995	-0.796973	0.00216627	0.15195	0.621832	0.826166	4.99662e-08	-0.307117	0.197845	-0.0684951	0.2198	0.737492	6.78789e-31	1.5108	2.28846e-26	0.420663	0.0851644
FBgn0037657	hyx	81.09	78.88	79.7	53.59	55.22	43.07	62.98	60.11	52.81	62.71	66.48	62.21	69.09	66.98	72.02	82.24	80.07	87.58	79.89	1.11718	50.6267	6.59482	58.6333	5.24334	63.8	2.33437	69.3633	2.53109	83.2967	3.8649	-0.166549	0.222565	-0.103164	0.408309	0.0306613	0.887133	0.0570737	0.626658	-0.257844	0.00746296	0.121321	0.0322867	0.150032	0.0247829	0.155062	0.136443	-0.111713	0.200003
FBgn0010222	Nmdmc	70.95	73.03	71.42	120.73	161.19	117.42	129.08	109.84	97.99	22	22.44	26.45	22.62	24.3	22.22	16.92	15.08	16.91	71.8	1.09083	133.113	24.3714	112.303	15.6907	23.63	2.45208	23.0467	1.10369	16.3033	1.05945	1.38299	2.06543e-22	0.988374	9.47773e-15	-0.427864	0.0105992	-2.77974	6.81015e-89	-1.54703	7.41252e-36	-0.636588	1.23496e-07	-0.757044	1.38709e-06	-3.58686	4.18753e-156	-2.30188	7.77427e-104
FBgn0014018	Rel	54.99	59.58	60.31	64.85	52.56	53.54	50.26	50.71	47.51	48.15	47.31	47.42	36.49	37.73	39.69	48.28	48.04	45.51	58.2933	2.88396	56.9833	6.83033	49.4933	1.73229	47.6267	0.456545	37.97	1.61344	47.2767	1.53468	0.465482	0.000189903	0.111043	0.233074	-0.386444	0.00080558	-0.538851	2.99483e-07	-0.222453	0.0063704	0.168745	0.0102908	-0.24743	0.000594909	-0.836883	1.71853e-15	-0.474083	1.77014e-10
FBgn0028708	Mst85C	75.39	75.19	80.98	20.02	21.86	21.01	26.99	25.65	24.73	59.93	56.84	64.63	69.07	68.63	70.1	100.67	93.7	98.94	77.1867	3.28664	20.9633	0.920887	25.79	1.13649	60.4667	3.92263	69.2667	0.754476	97.77	3.62931	-1.38258	8.94473e-37	-1.23631	1.77963e-36	0.112752	0.450056	1.24364	3.95305e-31	-0.288176	0.00711566	0.354382	2.281e-10	0.464944	3.25389e-08	1.65486	1.92421e-89	0.170279	0.0402252
FBgn0037659	Kdm2	10.05	15.68	14.22	33.03	26.71	28.41	33.28	32.43	30.63	33.42	35.1	34.94	32.23	34.21	34.49	34.34	33.1	34.74	13.3167	2.92168	29.3833	3.27049	32.1133	1.35308	34.4867	0.927218	33.6433	1.23196	34.06	0.855102	1.64933	2.4116e-23	1.62463	1.77998e-27	-0.0560031	0.75338	-0.0504991	0.670769	1.44945	3.97197e-23	-0.126228	0.0231838	-0.250502	1.11428e-05	-0.353961	0.000530212	1.19205	1.43362e-15
FBgn0037660	beag	46.64	45.48	41.41	24.15	25.03	18.73	26.5	26.03	19.84	35.82	37.37	36.25	44.48	41.3	42.93	47.18	47.18	52.46	44.51	2.74662	22.6367	3.41176	24.1233	3.71691	36.48	0.800187	42.9033	1.59017	48.94	3.04841	-0.486568	0.00195336	-0.542883	0.000781439	-0.0887826	0.732724	0.412156	0.00122024	-0.222045	0.0761796	0.0475378	0.564558	0.190641	0.0382147	0.549684	6.54667e-06	-0.0357555	0.761984
FBgn0037661	Ada	32.59	37.81	32.54	7.02	7.89	6.25	10.57	10.58	9.27	10.38	12.8	13.68	15.12	13.97	15.64	18.98	18.94	19.62	34.3133	3.02831	7.05333	0.820508	10.14	0.753459	12.2867	1.70884	14.91	0.854576	19.18	0.381576	-1.78642	3.39371e-29	-1.41296	2.35951e-22	0.340003	0.09269	0.514408	0.0189797	-1.42259	9.30953e-18	0.218263	0.0970931	0.417576	0.0270763	0.878125	7.04789e-08	-1.00802	1.07919e-15
FBgn0003165	pum	40.06	57.51	59.88	63.62	59.82	61.18	67.79	69.49	71.64	110.04	112.99	110.51	69.44	77.4	79.46	116.96	121.28	118.2	52.4833	10.824	61.54	1.92541	69.64	1.92938	111.18	1.58502	75.4333	5.29159	118.813	2.22435	0.737481	2.47186e-07	0.763847	5.65687e-08	-0.00602989	0.966973	0.572102	1.30634e-18	1.15939	3.08864e-18	0.510337	3.0567e-18	-0.139319	0.00198055	0.381826	5.22934e-09	1.01502	2.7489e-13
FBgn0037662	CG11997	0.02	0.22	0.28	0.04	0.04	0.03	0.06	0.04	0.08	0.45	0.33	0.46	0	0	0	0	0	0	0.173333	0.136137	0.0366667	0.0057735	0.06	0.02	0.413333	0.0723418	0	0	0	0	-1.62645	0.2897	-1.18064	0.408729	0.413093	0.876138	3.10117	0.00802203	1.31881	0.21229	NA	NA	-5.53642	0.00154885	-2.48156	0.459284	-4.2221	0.0545475
FBgn0000412	D1	544.13	521.52	501.4	310.61	336.42	300.04	354.85	338.72	345.82	327.45	352.32	307.76	432.36	376.91	416.44	361.44	333.4	374.96	522.35	21.3771	315.69	18.7145	346.463	8.08422	329.177	22.3301	408.57	28.5505	356.6	21.1985	-0.234216	0.0468421	-0.249935	0.0218742	-0.0494161	0.638541	-0.218446	0.00381972	-0.601337	1.03272e-08	-0.340246	1.33436e-08	-0.119758	0.0467131	-0.389479	6.95266e-10	-0.724252	2.36347e-15
FBgn0260935	Vps15	24.03	28.33	25.95	12.77	10.85	10.56	14.25	14.35	12.89	14.4	14.2	14.12	11.63	12.03	13.07	15.32	15.81	15.75	26.1033	2.1541	11.3933	1.20101	13.83	0.815598	14.24	0.144222	12.2433	0.743326	15.6267	0.26727	-0.698559	5.0286e-08	-0.56901	2.12599e-07	0.0975671	0.564957	0.0431956	0.757201	-0.8039	3.34498e-15	0.205238	0.0122705	-0.102097	0.315941	-0.11023	0.35543	-0.910301	1.05565e-24
FBgn0037664	CG8420	4.57	3.64	4.53	8.3	8.15	10.06	5.68	5.7	6.1	13.96	18.47	20.72	38.47	40.74	41.36	45.23	48.34	46.17	4.24667	0.525769	8.83667	1.06209	5.82667	0.236925	17.7167	3.44239	40.19	1.52148	46.58	1.59502	1.55274	2.09124e-13	0.79676	5.60348e-05	-0.789055	4.44499e-06	0.712344	0.000194931	2.11564	1.34691e-24	0.0639476	0.419261	1.16853	2.56044e-17	1.82765	7.67872e-45	3.27445	1.13739e-123
FBgn0037665	St2	0.61	0.3	0.39	0	0.06	0.02	0.03	0	0.05	0.1	0	0	0.04	0	0	0	0	0	0.433333	0.159478	0.0266667	0.0305505	0.0266667	0.0251661	0.0333333	0.057735	0.0133333	0.023094	0	0	-3.44824	0.0115071	-3.6923	0.00417406	-0.2958	NA	0.112255	NA	-3.52384	0.0317324	-0.0682551	NA	-1.81805	NA	-1.75068	NA	-5.34341	0.00103811
FBgn0037667	CG16734	49.19	55.91	50.53	23.93	25.16	22.38	25.79	23.54	23.18	26.21	25.61	23.36	23.22	24.87	25.75	29.46	29.5	27.11	51.8767	3.55665	23.8233	1.39307	24.17	1.41446	25.06	1.5025	24.6133	1.28438	28.69	1.36847	-0.62596	1.13566e-07	-0.756206	2.56637e-11	-0.163678	0.201434	-0.20183	0.123281	-0.976065	3.6319e-16	0.0707348	0.529267	-0.0475521	0.736405	-0.301743	0.00638926	-1.02854	4.85189e-23
FBgn0037668	CG16736	5.69	6.19	4.52	0.43	0.38	0.55	0.63	0.22	0.54	0.13	0.23	0	0.23	0.14	0.09	0.09	0	0.22	5.46667	0.857108	0.453333	0.0873689	0.463333	0.215484	0.12	0.115326	0.153333	0.070946	0.103333	0.110604	-3.09709	1.25389e-13	-3.22371	4.74983e-13	-0.161923	0.908063	-2.06426	0.166688	-5.23922	2.71139e-08	-0.577733	0.759405	-0.451225	0.868691	-2.53584	0.0540255	-5.63254	9.58607e-12
FBgn0037669	Ibf2	92.75	80.16	80.57	52.27	57.08	47.37	56.46	46.05	48.12	54.69	51.04	46.23	94.14	93.81	96.43	106.69	97.94	104.68	84.4933	7.15342	52.24	4.85507	50.21	5.51073	50.6533	4.24323	94.7933	1.42697	103.103	4.58312	-0.204533	0.209271	-0.412296	0.00849275	-0.2416	0.103504	-0.31746	0.0212056	-0.671183	1.77824e-05	-0.0197939	0.815831	0.785884	6.76499e-13	0.417589	3.84561e-05	0.112823	0.404762
FBgn0037670	Ibf1	48.76	62.75	61.49	25.7	22.72	25.05	29.95	27.79	31.67	27.99	34.15	36.81	20.88	21.41	25.12	46.33	49.44	43.59	57.6667	7.73908	24.49	1.56694	29.8033	1.94415	32.9833	4.52426	22.47	2.31022	46.4533	2.92695	-0.731774	3.51124e-07	-0.600348	5.81718e-06	0.0989638	0.603783	0.141415	0.416195	-0.739933	8.40151e-07	0.89639	4.91232e-15	0.262637	0.0896501	0.35184	0.00832185	-0.48315	0.000199726
FBgn0037671	ATP6AP2	125.05	146.63	148.87	169.18	162.95	174.62	166.17	169.45	174.79	175.22	177.05	166.9	175.64	178.3	181.88	166.58	181.61	170.98	140.183	13.1536	168.917	5.83945	170.137	4.35083	173.057	5.40977	178.607	3.13128	173.057	7.7272	0.771402	1.13662e-13	0.629431	6.73764e-12	-0.174995	0.0821199	-0.246169	0.00315523	0.375831	1.36297e-05	-0.193489	0.000514923	-0.237559	0.000348357	-0.533931	5.3099e-11	0.134807	0.146271
FBgn0037672	sage	8.38	9.85	11.12	2.51	1.76	1.26	4.16	2.71	2.44	0.41	0.77	1.11	0.3	0.39	0.32	0	0	0	9.78333	1.37122	1.84333	0.629153	3.10333	0.925005	0.763333	0.350048	0.336667	0.0472582	0	0	-1.92249	9.05057e-12	-1.31221	1.81645e-07	0.577949	0.205695	-1.59437	0.00646719	-3.68333	6.29756e-23	-4.85696	0.00334203	-6.11582	0.000128488	-7.73714	4.96228e-09	-9.75357	1.57722e-15
FBgn0010803	TrpRS	78.48	78.8	80.98	72.08	92.27	75.27	83.11	79.79	71	84.02	80.51	81.04	103.38	95.13	100.92	107.5	101.84	108.71	79.42	1.36044	79.8733	10.8537	77.9667	6.25751	81.8567	1.89215	99.81	4.23553	106.017	3.66735	0.502767	8.06315e-05	0.317872	0.00301444	-0.218458	0.144381	-0.243148	0.0284998	0.111013	0.239082	-0.056	0.352625	0.1397	0.0390902	-0.155994	0.134935	0.245725	0.000901727
FBgn0285911	Vps16A	75.43	101.45	94.94	29.09	31.56	25.71	34.88	33.74	32.16	39.54	36.58	36.22	39.15	37.1	41.88	45.29	41.37	43.5	90.6067	13.5404	28.7867	2.93677	33.5933	1.36592	37.4467	1.82179	39.3767	2.39805	43.3867	1.96246	-1.15377	9.03851e-20	-1.08025	2.1602e-20	0.0405076	0.805378	0.102597	0.358321	-1.20014	7.38819e-24	-0.00318486	0.971368	-0.0224969	0.807687	0.0281058	0.773639	-1.22816	6.53918e-28
FBgn0037676	CG8861	0	0	0.07	0.02	0	0.04	0.05	0.04	0.05	0	0	0.13	0	0	0	0	0	0	0.0233333	0.0404145	0.02	0.02	0.0466667	0.0057735	0.0433333	0.0750555	0	0	0	0	0.39487	0.915756	1.30202	0.580896	0.999413	0.761326	0.0755265	NA	0.303945	NA	NA	NA	-1.99144	0.679246	-1.97332	NA	-1.68005	NA
FBgn0037675	HP1e	0	0.26	0.06	0	0	0	0.06	0	0	0	0	0	0	0	0	0	0	0	0.106667	0.136137	0	0	0.02	0.034641	0	0	0	0	0	0	-3.06046	NA	-2.1618	0.549234	0.861696	NA	NA	NA	-1.21122	NA	NA	NA	NA	NA	NA	NA	-1.94668	NA
FBgn0037677	CG12951	0.86	2.06	1.38	0.08	0.03	0	0	0	0	0	0	0	0	0	0	0	0	0	1.43333	0.601775	0.0366667	0.0404145	0	0	0	0	0	0	0	0	-4.97376	2.03405e-05	-7.49994	2.15333e-07	-2.62758	NA	-0.540191	NA	-5.58701	0.000137699	NA	NA	NA	NA	-1.3526	NA	-6.34833	9.38998e-06
FBgn0037678	CG16749	22.87	21.71	24.18	1.38	0.8	1.2	1.43	1.51	1.25	1.24	0.35	1.67	0.63	0.5	0.72	0.28	0.33	0.15	22.92	1.23576	1.12667	0.296873	1.39667	0.133167	1.08667	0.673226	0.616667	0.110604	0.253333	0.0929157	-3.8654	7.00331e-50	-3.69718	1.73422e-65	0.127014	0.878387	-0.384902	0.656414	-4.46347	2.48227e-30	-1.50362	0.132242	-2.37376	0.035811	-2.80697	0.00142835	-6.80149	1.27587e-31
FBgn0037679	Aduk	47.3	47.7	49.38	17.66	16.65	17.56	19.67	18.92	18.3	26.96	26.33	23.72	42.72	40.59	41.08	46.7	45.47	45.31	48.1267	1.10369	17.29	0.556507	18.9633	0.686027	25.67	1.71788	41.4633	1.11554	45.8267	0.760548	-0.979313	9.82805e-18	-0.998499	5.16986e-24	-0.0520846	0.763406	0.293573	0.0211572	-0.834069	3.41226e-14	-0.0018312	0.983679	0.594666	5.69843e-10	0.83859	8.78276e-19	-0.243114	0.00352186
FBgn0037680	pasi2	29.35	39.26	41.25	32.24	29.84	36.13	31.56	32.43	40.14	54.94	56.36	59.4	72.65	75.26	74.38	71.22	72.72	76.04	36.62	6.37414	32.7367	3.17428	34.71	4.72259	56.9	2.27851	74.0967	1.32787	73.3267	2.4666	0.347108	0.0408518	0.278276	0.110232	-0.102188	0.670276	0.51194	5.9054e-05	0.709048	1.76652e-07	-0.159955	0.015193	0.135174	0.138803	0.593955	4.33589e-07	0.836342	2.51038e-10
FBgn0266410	CG45050	113.22	124.83	133.21	175.92	183.46	212.4	189.48	190.1	238.18	687.15	757.51	680.52	752.69	765.47	779.6	803.96	739.59	806.96	123.753	10.0384	190.593	19.2577	205.92	27.9397	708.393	42.6653	765.92	13.4606	783.503	38.0596	1.12656	7.69956e-20	1.08472	7.63848e-18	-0.0760453	0.735865	1.60964	7.06624e-61	2.58673	3.15362e-236	-0.111961	0.00701625	-0.0891091	0.0688231	1.46965	1.58329e-54	2.4929	6.62311e-261
FBgn0263750	CG43675	1.7	2.11	2.48	2.16	2.32	2.65	3.42	3.35	2.64	3.73	2.75	3.36	1.26	1.24	1.3	1.57	1.7	1.22	2.09667	0.390171	2.37667	0.249867	3.13667	0.431548	3.28	0.494874	1.26667	0.0305505	1.49667	0.248261	0.687474	0.0191032	0.929617	0.000486249	0.209407	0.552449	0.173344	0.61081	0.710095	0.0201234	0.0705069	0.863935	-1.38448	0.000132243	-1.26188	0.000137032	-0.679216	0.0509104
FBgn0037683	CG18473	3.28	2.92	2.95	1.5	0.37	0.36	0.99	0.24	1.16	0.64	0.55	1.52	0.32	0.16	0.12	0.24	0.11	0.3	3.05	0.19975	0.743333	0.655312	0.796667	0.489524	0.903333	0.535942	0.2	0.10583	0.216667	0.0971253	-1.56414	0.0102135	-1.59798	0.00372	-0.0703903	0.964132	-0.0318951	0.974252	-1.79077	0.000265146	0.0257088	0.985223	-2.18852	0.0240672	-2.28236	0.0216379	-3.87885	8.14745e-12
FBgn0037684	Srr	2.75	3.33	3.49	0.55	0.96	0.97	0.69	1.18	1.72	0.26	0.07	0.13	0.02	0.19	0.07	0	0	0	3.19	0.389358	0.826667	0.239653	1.19667	0.515202	0.153333	0.0971253	0.0933333	0.0873689	0	0	-1.435	4.84397e-05	-1.05383	0.00777609	0.345486	0.649174	-2.71695	0.00554806	-4.31596	9.02631e-09	-3.26781	0.196396	-4.09089	0.115542	-6.84773	9.19667e-07	-8.39374	1.86124e-11
FBgn0000723	FER	0.95	1.17	2.05	7.41	6.19	5.34	10.63	9.59	9.46	5.66	4.66	5.34	1.15	1.47	1.24	0	0	0.04	1.39	0.582065	6.31333	1.0405	9.89333	0.641275	5.22	0.510686	1.28667	0.165025	0.0133333	0.023094	2.68927	1.01088e-23	3.18458	1.66296e-40	0.466286	0.00220833	-0.554317	0.00330757	1.98444	1.76174e-11	-6.4211	6.71508e-09	-8.52545	8.83699e-16	-9.12928	2.47025e-18	-6.55476	8.78534e-09
FBgn0037685	Or85f	1.56	2.49	2.38	0.3	0.42	0.33	0.45	0.28	0.3	0.3	0.43	0.3	0.21	0.22	0.19	0.2	0.23	0.27	2.14333	0.508167	0.35	0.06245	0.343333	0.0929157	0.343333	0.0750555	0.206667	0.0152753	0.233333	0.0351188	-2.10479	1.85212e-05	-2.29107	1.8443e-06	-0.21326	0.861866	-0.294013	0.793993	-2.54313	0.000116255	0.0452229	0.972857	-0.788877	0.533598	-1.13648	0.252204	-3.3465	1.65724e-07
FBgn0083953	CG34117	134.33	89.75	85.03	64.79	79.67	57.39	70.52	67.98	57.27	65.4	69.02	55.51	122.35	112.64	119.77	129.95	151.24	125.72	103.037	27.2034	67.2833	11.3473	65.2567	7.03229	63.31	6.99329	118.253	5.02954	135.637	13.6774	-0.137508	0.609036	-0.328809	0.185929	-0.226532	0.273534	-0.357338	0.0461816	-0.644717	0.00842269	0.0391202	0.746167	0.848965	1.06747e-08	0.442399	0.00434465	0.212483	0.378247
FBgn0037686	RpL34b	3042.55	1719.25	1826.26	3415.57	3129.57	2565.2	3095.49	3121.13	2493.58	1331.48	1305.41	1331.33	1866.36	1893.4	1758.86	1679.57	1791.08	1628	2196.02	735.066	3036.78	432.712	2903.4	355.146	1322.74	15.0084	1839.54	71.167	1699.55	83.3557	0.942843	0.000105035	0.730636	0.00278676	-0.245398	0.119091	-1.47656	1.62833e-56	-0.680545	0.0033939	-0.260024	2.43313e-05	0.126785	0.0440323	-1.40119	4.45279e-44	-0.554051	0.0198741
FBgn0037687	CG8132	19.13	17.83	17.58	42.66	39.22	43.93	39.11	37.19	37.96	28.67	26.64	27.28	31.83	30.01	30.29	41.13	43.92	42.98	18.18	0.832166	41.9367	2.43689	38.0867	0.966247	27.53	1.03783	30.71	0.98	42.6767	1.41952	1.70216	1.18916e-30	1.41033	1.20151e-27	-0.324848	0.00628968	-0.889188	1.97386e-11	0.66437	1.33969e-05	0.325756	0.00042231	0.395604	0.00173687	-0.545409	2.02844e-06	1.05585	2.49501e-17
FBgn0037688	CG9356	17.16	18.53	18.43	20.79	20.37	21.18	19.9	22.42	21.08	45.41	46.22	44.49	67.05	62.95	66.21	65.76	67.71	64.05	18.04	0.763741	20.78	0.405093	21.1333	1.26085	45.3733	0.865583	65.4033	2.16576	65.84	1.83131	0.702708	2.14348e-08	0.576087	5.06413e-06	-0.15987	0.281807	0.846279	4.08931e-16	1.39994	4.81282e-42	-0.139644	0.0381797	0.298564	0.000494422	1.09447	4.17949e-33	1.69465	2.96499e-80
FBgn0260237	CG42511	17.59	15.15	17.88	14.02	14.17	12.64	15.78	16.3	14.03	19.01	20.6	20.7	26.32	24.39	25.55	29.08	29.02	31.91	16.8733	1.49948	13.61	0.843386	15.37	1.18924	20.1033	0.948174	25.42	0.971545	30.0033	1.65149	0.183362	0.213219	0.208729	0.158873	-0.0078406	0.969693	0.281388	0.00969304	0.315752	0.0203639	0.0971773	0.21657	0.347718	0.000242053	0.576726	2.58122e-10	0.657335	6.83307e-08
FBgn0037689	CG8135	17.59	15.15	17.88	14.02	14.17	12.64	15.78	16.3	14.03	19.01	20.6	20.7	26.32	24.39	25.55	29.08	29.02	31.91	16.8733	1.49948	13.61	0.843386	15.37	1.18924	20.1033	0.948174	25.42	0.971545	30.0033	1.65149	0.183362	0.213219	0.208729	0.158873	-0.0078406	0.969693	0.281388	0.00969304	0.315752	0.0203639	0.0971773	0.21657	0.347718	0.000242053	0.576726	2.58122e-10	0.657335	6.83307e-08
FBgn0265201	CG44261	10.01	3.52	3.55	0	0.15	0.38	0.52	0.79	0.47	0.84	1.16	0.58	0	0.37	0.65	0	0	0.2	5.69333	3.73837	0.176667	0.191398	0.593333	0.172143	0.86	0.290517	0.34	0.326037	0.0666667	0.11547	-4.52393	4.69001e-07	-2.9622	1.15582e-05	1.53676	0.390372	1.92424	0.252557	-2.72225	0.00107071	-2.29138	0.38339	-3.64448	0.0774794	-1.7651	0.577916	-6.40616	4.44502e-06
FBgn0003889	betaTub85D	1.95	2.14	2.5	0.02	0.04	0	0.05	0.13	0.03	0.06	0.05	0.28	0.11	0.07	0.2	0.04	0	0.1	2.19667	0.279344	0.02	0.02	0.07	0.052915	0.13	0.13	0.126667	0.0665833	0.0466667	0.0503322	-6.40188	4.7103e-14	-4.62889	3.88328e-16	1.80238	0.47885	2.56159	0.211435	-4.21269	3.56313e-08	-1.3734	0.385031	-1.50963	0.45524	0.950871	0.722301	-5.4118	5.93517e-11
FBgn0037690	Task7	5.87	7.33	6.37	0.22	0.13	0.06	0.49	0.62	0.68	0	0	0	0.07	0.02	0	0	0	0	6.52333	0.741979	0.136667	0.0802081	0.596667	0.0971253	0	0	0.03	0.0360555	0	0	-5.14959	6.64665e-38	-3.09453	1.68478e-32	2.00008	0.00650797	-3.59858	0.116235	-8.86203	6.04871e-13	-1.92294	NA	NA	NA	-4.43423	0.0342621	-9.64832	3.25619e-15
FBgn0011740	alpha-Man-IIa	27.31	31.29	31.34	21.13	22.63	21.01	22.33	22.83	20.55	32.28	38.16	36.86	35.33	36.83	37.96	50.96	52.23	50.71	29.98	2.31242	21.59	0.902663	21.9033	1.19839	35.7667	3.08871	36.7067	1.31933	51.3	0.815046	0.0259984	0.817228	-0.104262	0.334193	-0.16335	0.13194	0.446379	5.71307e-07	0.323316	0.0011332	0.336025	3.01655e-10	0.286775	0.00020626	0.681251	1.46373e-24	0.60536	1.01364e-15
FBgn0261552	ps	6.07	7.24	9.25	21	20.06	22.56	25.35	24.31	31.56	30.78	33.63	32.74	5.45	6.02	5.16	0.67	0.35	0.72	7.52	1.60838	21.2067	1.26275	27.0733	3.92021	32.3833	1.45809	5.54333	0.437531	0.58	0.200749	2.00419	4.69593e-40	2.20368	2.93023e-41	0.165988	0.353776	0.327113	0.000599003	2.18005	4.43116e-55	-3.33097	1.01219e-56	-5.95305	7.4201e-259	-5.68463	7.9977e-190	-3.80744	1.17937e-48
FBgn0037696	GstZ1	1.32	1.07	1.25	36.63	37.6	41.32	39.78	35.61	42.11	24.85	24.63	24.02	35.45	38.38	34.51	45.88	39.58	45.34	1.21333	0.12897	38.5167	2.47573	39.1667	3.29312	24.5	0.43	36.1133	2.01847	43.6	3.49188	5.47765	1.47507e-129	5.34803	4.66182e-131	-0.163055	0.338205	-0.934308	8.99422e-11	4.393	7.40565e-75	0.13373	0.247979	0.600847	9.88388e-06	-0.385225	0.00233448	4.98682	1.96888e-118
FBgn0037697	GstZ2	4.71	1.85	2.95	0.03	0.02	0.01	0.09	0.11	0.14	0.11	0	0.17	0	0	0	0	0	0	3.17	1.44264	0.02	0.01	0.113333	0.0251661	0.0933333	0.0862168	0	0	0	0	-6.95845	5.6181e-15	-4.43679	8.84481e-14	2.40599	0.192154	1.83526	NA	-5.43907	2.20108e-06	NA	NA	-3.26754	0.398236	-1.43847	NA	-8.35761	1.995e-10
FBgn0037698	CG16779	0.12	0.22	0.27	0.04	0.08	0.07	0.18	0.18	0.25	0.04	0	0	0.01	0.01	0.01	0	0	0	0.203333	0.0763763	0.0633333	0.0208167	0.203333	0.0404145	0.0133333	0.023094	0.01	0	0	0	-1.15873	0.0335706	0.339159	0.443356	1.45944	0.00345286	-2.56418	0.0559216	-3.87172	7.86531e-05	-3.13493	0.218568	-3.55373	0.406279	-6.21872	4.73952e-05	-7.49361	1.73619e-08
FBgn0043791	phu	0	0.1	0.06	0.07	0.07	0.22	0.2	0.31	0.25	0	0	0	0	0.02	0	0.04	0	0	0.0533333	0.0503322	0.12	0.0866025	0.253333	0.0550757	0	0	0.00666667	0.011547	0.0133333	0.023094	1.72053	0.272297	2.65735	0.0187195	0.894293	0.461694	-3.55666	0.128254	-2.00026	NA	0.965773	NA	0.177745	NA	-3.42751	0.0858392	-1.82837	0.517959
FBgn0014380	RhoL	3.54	5.71	5.84	11.4	14.59	9.6	21.25	18.07	16.8	6.93	5.8	8.09	4.53	4.05	4.13	0.3	0	0.31	5.03	1.29201	11.8633	2.52706	18.7067	2.2923	6.94	1.14503	4.23667	0.257164	0.203333	0.176163	1.74225	5.86185e-12	2.25078	2.76804e-26	0.474975	0.0271218	-1.0641	3.3483e-05	0.531455	0.0812843	-4.31243	2.57067e-13	-5.11814	7.71882e-17	-6.21071	3.10982e-29	-4.59045	1.64025e-13
FBgn0037700	CG8149	110.69	119.99	105.58	87.43	110.95	93.15	104.64	101.76	102.38	104.96	115.79	102.05	159.84	151.79	150.11	142.44	137.46	137.57	112.087	7.30582	97.1767	12.2661	102.927	1.51583	107.6	7.24045	153.913	5.20093	139.157	2.84398	0.288123	0.0423619	0.221584	0.0515777	-0.101025	0.527872	-0.131038	0.270516	0.00944727	0.938166	-0.290973	2.13888e-07	0.132488	0.0772438	-0.0474509	0.652721	0.140785	0.131519
FBgn0267790	rump	142.35	188.93	170.41	147.5	166.43	134.02	180	173.17	150.26	149.16	154.13	152.37	171.12	159.35	174.67	194.9	184.13	193.51	167.23	23.4523	149.317	16.2812	167.81	15.5777	151.887	2.52001	168.38	8.01912	190.847	5.85818	0.335631	0.00955222	0.354478	0.00592086	-0.0137329	0.94661	-0.253671	0.00204826	-0.0665491	0.547473	0.0366969	0.480094	0.0959545	0.0356145	-0.210094	0.00818695	0.0237098	0.826258
FBgn0003205	Ras85D	64.54	96.5	102.09	67.2	71.52	85.63	83.13	85.73	100.26	210.14	214.78	178.38	151.97	140.37	154.69	183.19	157.26	184.79	87.71	20.2595	74.7833	9.63863	89.7067	9.23145	201.1	19.8124	149.01	7.60505	175.08	15.4533	0.282625	0.141448	0.39027	0.0252929	0.0741397	0.753835	1.14345	1.58687e-20	1.27544	1.45779e-15	0.0897001	0.213875	-0.435528	7.07243e-08	0.656905	3.62802e-08	0.833581	2.66704e-07
FBgn0014022	Rlb1	46.32	50.46	49.31	39.43	48.64	40.33	35.48	33.03	33.57	46.38	54.75	50.08	41.94	41.53	43.79	59.69	50.77	57.67	48.6967	2.13706	42.8	5.07757	34.0267	1.28726	50.4033	4.19436	42.42	1.20403	56.0433	4.67719	0.31039	0.0154482	-0.170719	0.100456	-0.515222	9.03348e-06	-0.0433346	0.753749	0.118781	0.277329	0.262731	0.000818456	-0.0788019	0.481208	-0.174051	0.134699	0.0360957	0.715704
FBgn0014023	mRpL47	93.46	79.96	77.58	89.63	106.3	79.94	81.86	81.8	64.17	70.25	81.4	70.94	83.94	83.58	80.06	100.71	104.83	104.01	83.6667	8.56435	91.9567	13.3331	75.9433	10.196	74.1967	6.2478	82.5267	2.14377	103.183	2.18086	0.622865	0.000147383	0.198704	0.267751	-0.457654	0.00352117	-0.585071	1.78971e-06	-0.11073	0.482553	0.174685	0.0150784	0.236151	0.0142344	-0.398368	0.000320303	0.125907	0.368416
FBgn0037702	CG8176	31.25	37.34	42.44	41.74	40.96	41.04	42.98	42.56	42.28	80.03	84.66	77.89	70.17	70.88	75.51	81.12	72.15	81.89	37.01	5.60229	41.2467	0.429108	42.6067	0.352326	80.86	3.46048	72.1867	2.8999	78.3867	5.41482	0.660574	9.46636e-09	0.555491	5.15983e-07	-0.137672	0.0953588	0.691047	1.11686e-23	1.20077	1.9471e-28	-0.0241203	0.714664	-0.279044	8.04965e-07	0.360156	3.72372e-07	0.915579	1.87559e-15
FBgn0037703	JHDM2	18.94	21.64	22.78	9.65	9.63	7.08	10.55	10.55	9.25	7.34	7.38	8.87	9.24	8.8	10.29	11.66	10.8	13.32	21.12	1.97211	8.78667	1.47805	10.1167	0.750555	7.86333	0.872028	9.44333	0.765528	11.9267	1.28099	-0.768349	3.43782e-07	-0.713053	1.07999e-09	0.0230505	0.933843	-0.446349	0.0126812	-1.36777	1.13469e-24	0.199674	0.10718	0.381872	0.0173686	-0.119281	0.486309	-0.987045	2.53679e-16
FBgn0000244	by	2.29	2.44	3.34	27.36	26.46	25.32	32.64	29.57	34.71	8.2	9.1	6.39	9.38	9.96	9.58	7.82	6.3	6.92	2.69	0.567891	26.38	1.02235	32.3067	2.58616	7.89667	1.38023	9.64	0.294618	7.01333	0.764286	3.79196	9.64938e-145	3.93366	1.57187e-148	0.10872	0.396892	-2.00288	4.67028e-54	1.63103	3.32205e-14	-0.597167	3.47837e-07	-0.413173	0.0247632	-2.47036	6.88896e-119	1.2135	1.35192e-09
FBgn0037705	mura	8.09	15.67	16.6	13.56	10.24	12.39	15.41	15.19	19.84	15.69	16.79	14.42	19.65	18.35	16.55	31.89	33.36	35.1	13.4533	4.668	12.0633	1.68393	16.8133	2.62348	15.6333	1.18602	18.1833	1.55671	33.45	1.60689	0.360123	0.156538	0.68562	0.00473037	0.293904	0.129477	0.0935201	0.547706	0.300668	0.20368	0.733715	9.06587e-19	0.858191	7.29268e-26	0.902746	8.69272e-13	1.15566	5.25614e-07
FBgn0037707	RnpS1	73.67	77.68	69.78	77.86	100.01	68.75	82.9	79.63	64.21	80.01	82.7	83.4	111.02	109.45	106.34	126.02	129.22	133.57	73.71	3.95015	82.2067	16.0769	75.58	9.98153	82.0367	1.7897	108.937	2.38186	129.603	3.78957	0.647826	3.65629e-05	0.379152	0.00792422	-0.301931	0.108175	-0.279667	0.0353881	0.220511	0.0379502	0.105219	0.0757251	0.426637	2.23109e-10	0.0945632	0.478983	0.64278	4.36431e-13
FBgn0037708	CG9386	15.6	15.04	17.11	19.51	23.8	19.88	18.91	17.52	17.56	11.33	9.09	9.39	10.16	10.51	10.99	11.19	9.3	9.72	15.9167	1.07072	21.0633	2.37723	17.9967	0.791223	9.93667	1.21595	10.5533	0.416693	10.07	0.992421	0.899402	1.23524e-10	0.521278	2.14564e-05	-0.412034	0.00138581	-1.36022	3.65304e-17	-0.610149	0.000375733	-0.207401	0.157455	-0.215362	0.307971	-1.62641	1.16543e-30	-0.829563	1.34181e-08
FBgn0037709	CG8199	12.09	13.59	14.35	54.03	67.47	51.4	54.61	51.99	42.33	47.14	45.43	42.43	36.48	38.33	38.67	49.01	47.93	48.46	13.3433	1.15001	57.6333	8.6197	49.6433	6.46759	45	2.38426	37.8267	1.17857	48.4667	0.540031	2.60761	3.59122e-85	2.24271	1.84912e-63	-0.397682	0.0117902	-0.632422	8.39797e-08	1.82599	3.42617e-59	0.211926	0.00213459	-0.131464	0.148459	-0.813893	4.42585e-14	1.69056	5.23262e-70
FBgn0024833	AP-1mu	48.88	51.79	52.42	53.74	59.72	52.81	57.28	60.24	52.66	98.76	95.41	88.37	115.77	105.93	111.57	136.39	144.69	146.95	51.03	1.88841	55.4233	3.74996	56.7267	3.82017	94.18	5.30308	111.09	4.93753	142.677	5.56044	0.616127	6.39781e-10	0.499484	1.34445e-06	-0.14991	0.230303	0.487447	2.72535e-08	0.954593	4.42891e-25	0.215308	0.000191964	0.361564	2.58837e-07	0.797892	1.13884e-27	1.31229	1.16055e-71
FBgn0027950	MBD-like	176.3	162.53	156.93	40.11	40.98	35.26	46.78	42.96	43.58	42.66	47.4	47.48	89.28	79.6	78.73	96.26	97.47	96.03	165.253	9.96803	38.7833	3.08215	44.44	2.05007	45.8467	2.76002	82.5367	5.85608	96.5867	0.773585	-1.60081	5.20802e-35	-1.55383	8.5625e-38	0.0133934	0.941205	-0.0395117	0.765735	-1.78815	2.30048e-47	0.0803893	0.331839	0.842439	3.97101e-22	0.750549	3.69753e-18	-0.949667	8.94301e-20
FBgn0037710	CG9393	75.27	79.89	81.69	47.56	51.39	46.63	43.85	46.38	42.22	90.05	92.09	88.43	118.59	107.16	113.64	114.23	101.74	116.56	78.95	3.31162	48.5267	2.52294	44.15	2.09616	90.19	1.83401	113.13	5.73204	110.843	7.96933	-0.204693	0.0424524	-0.491328	4.678e-07	-0.320035	0.00112948	0.614941	1.68421e-14	0.261355	0.00169809	-0.170696	0.0123832	0.065018	0.408329	0.62755	1.57943e-15	0.320891	0.00010373
FBgn0261049	Vps45	22.69	28.18	25.84	12.16	12.45	11.6	13.93	14.01	12.8	32.46	33	32.2	16.22	18.14	18.28	27.2	25.02	23.98	25.57	2.75494	12.07	0.432088	13.58	0.676683	32.5533	0.408085	17.5467	1.15106	25.4	1.64329	-0.582305	3.51471e-06	-0.563758	5.2603e-06	-0.0145669	0.941791	1.15165	2.02818e-30	0.420683	0.000166657	0.387223	0.000122992	-0.594697	1.21807e-09	0.505888	2.48836e-06	-0.17797	0.137347
FBgn0037712	CG16789	9.5	10.8	11.52	1.11	0.85	0.74	1.46	1.24	1.22	0.21	0.18	0.32	0.3	0.43	0.43	0.08	0	0.09	10.6067	1.02378	0.9	0.19	1.30667	0.133167	0.236667	0.0737111	0.386667	0.0750555	0.0566667	0.0493288	-3.07318	2.33935e-54	-2.67259	1.42093e-62	0.366844	0.331802	-2.25712	0.000173198	-5.49617	8.04096e-41	-2.67946	0.00189005	-2.08752	0.0934815	-4.29742	5.43626e-09	-7.42556	4.4528e-38
FBgn0037713	CG16790	9.84	10.1	11.77	8.95	12.81	10.47	12.19	12.41	10.64	11.16	10.98	8.9	21.19	21.03	20.44	22.91	26.25	20.85	10.57	1.04733	10.7433	1.94446	11.7467	0.964693	10.3467	1.25608	20.8867	0.395011	23.3367	2.72517	0.521796	0.0143597	0.497099	0.00450601	-0.0584621	0.865401	-0.324916	0.194664	0.0487324	0.828588	-9.75009e-05	0.999667	0.919963	5.32261e-06	0.545675	0.00570816	0.960722	1.57765e-08
FBgn0037714	CG9396	1.69	1.46	2.38	1.52	1.97	1.7	3.66	2.55	4.38	0.18	0	0	0.13	0.13	0.06	0	0	0	1.84333	0.478783	1.73	0.226495	3.53	0.9219	0.06	0.103923	0.106667	0.0404145	0	0	0.407272	0.436365	1.28139	0.00313673	0.839445	0.066593	-4.89152	0.000761776	-4.6337	0.00114289	-2.19059	NA	-1.70299	NA	-6.64545	2.18329e-06	-6.34262	6.10151e-06
FBgn0037715	CG9399	46.78	56.48	52.26	38.59	43.17	35.17	41.96	37.72	34.36	70.96	74.33	87.74	84.54	80.13	86.91	72.16	69.02	78.1	51.84	4.86362	38.9767	4.01399	38.0133	3.80848	77.6767	8.8765	83.86	3.44077	73.0933	4.61139	0.0863545	0.542548	-0.100638	0.474748	-0.219914	0.147353	0.711162	3.6334e-09	0.649189	1.93708e-07	-0.33808	2.55509e-06	-0.314644	0.00524879	0.344573	0.00115764	0.329903	0.00143507
FBgn0027338	Kap-alpha3	281.34	303.31	286.92	371.23	424.46	386.98	379.39	394.79	371.75	446.86	477.61	435.42	426.83	421.69	446.61	409.35	381.54	410.01	290.523	11.4196	394.223	27.3442	381.977	11.7358	453.297	21.8191	431.71	13.1572	400.3	16.25	0.936501	6.15944e-21	0.740782	1.12039e-16	-0.229334	0.0149607	-0.0786074	0.326697	0.709454	1.83557e-19	-0.253074	4.13752e-11	-0.414203	1.05687e-23	-0.543882	2.7618e-17	0.291569	7.04554e-06
FBgn0037716	CG8273	40.25	40.12	41.23	14.18	15.75	12.99	21.59	20.25	18.72	54.87	58.56	54.29	45.09	45.46	48.56	68.1	64.96	68.71	40.5333	0.606822	14.3067	1.38435	20.1867	1.43605	55.9067	2.31608	46.37	1.9056	67.2567	2.01222	-1.00794	3.29637e-19	-0.661745	1.78046e-10	0.312893	0.00902106	1.68795	4.68433e-80	0.531533	1.72864e-09	0.39278	1.24987e-14	0.0311849	0.630691	1.66805	2.79518e-94	0.559202	1.29213e-14
FBgn0037717	CG8301	9.71	9.38	12.82	14.96	10.52	13.05	10.05	11.4	10.84	16.71	20.18	16.32	29.22	29.24	27.97	37.41	37.3	40.92	10.6367	1.89801	12.8433	2.2272	10.7633	0.678258	17.7367	2.12495	28.81	0.72753	38.5433	2.05899	0.775339	5.58307e-05	0.368097	0.0225922	-0.438346	0.0149347	0.18553	0.302824	0.809298	6.96413e-07	0.276793	3.79991e-05	0.879939	3.34002e-19	1.01711	1.23663e-12	1.68658	1.51906e-33
FBgn0053654	CG33654	0.08	1.31	0.69	0.07	0	0	0.07	0	0	0.25	0.65	0.38	0	0	0	0.17	0	0	0.693333	0.615007	0.0233333	0.0404145	0.0233333	0.0404145	0.426667	0.204042	0	0	0.0566667	0.0981495	-4.54307	0.0300983	-4.61195	0.0232274	-0.100077	NA	4.1182	0.0931231	-0.557803	0.706758	2.02091	NA	-2.82569	0.250506	1.25144	NA	-3.40921	0.0873676
FBgn0037718	P58IPK	39.63	43.04	42.74	42.65	60.81	47.76	56.23	55.58	50.06	79.78	79.11	76.59	87.18	80.14	85.54	109.14	107.16	111	41.8033	1.88813	50.4067	9.36483	53.9567	3.39023	78.4933	1.68203	84.2867	3.68355	109.1	1.92031	0.765836	2.45471e-07	0.714772	1.47423e-13	-0.085136	0.709607	0.361078	0.00497949	0.978855	1.88287e-33	0.227714	5.26263e-06	0.239229	1.77386e-05	0.549784	5.03199e-06	1.21396	7.26392e-81
FBgn0037719	bocks	56.59	51.38	62.05	37.85	37.94	40.58	39.57	39.76	41.27	51.77	56.19	56.4	83.06	79.32	85.64	74.67	78.45	82.73	56.6733	5.33549	38.79	1.55084	40.2	0.931504	54.7867	2.61462	82.6733	3.17769	78.6167	4.03258	-0.0485822	0.744255	-0.149402	0.239399	-0.134149	0.298199	0.214098	0.0459072	0.0158554	0.90445	-0.217452	0.000748166	0.288946	0.000728122	0.451171	1.31015e-06	0.299417	0.00939223
FBgn0037720	CG8312	8.63	8.1	11.18	11.68	10.44	9.71	9.92	10.46	10.44	32.32	33.16	33.51	20.96	21.32	22.61	33.15	33.48	34.75	9.30333	1.6467	10.61	0.995942	10.2733	0.306159	32.9967	0.611583	21.63	0.867583	33.7933	0.844768	0.688564	1.56139e-05	0.492434	0.00119274	-0.228022	0.0669993	1.35778	5.32731e-46	1.89475	7.33431e-44	0.498646	1.83569e-17	-0.198822	0.00370488	1.1065	1.94382e-32	1.68955	1.39626e-34
FBgn0037721	CG9427	4.48	5.96	4.34	1.04	0.23	0.84	0.64	2.47	1.17	3.97	4.15	3.88	0.3	0.46	0.18	0	0	0	4.92667	0.897626	0.703333	0.42194	1.42667	0.941612	4	0.137477	0.313333	0.140475	0	0	-2.30603	3.34012e-05	-1.42864	0.00677223	0.842514	0.436558	2.22493	0.000287562	-0.222594	0.528192	-4.00536	0.0426396	-7.75841	4.73627e-09	-5.59179	0.00116292	-7.98938	3.16103e-10
FBgn0037722	CG8319	41.63	37.87	38.63	27.82	25.07	25.44	24.32	24.15	25.59	50.33	51.85	49.24	80.04	79.61	80.87	95.18	91.47	93.65	39.3767	1.9881	26.11	1.49241	24.6867	0.786914	50.4733	1.31089	80.1733	0.640495	93.4333	1.86447	-0.0995905	0.521419	-0.330674	0.0140576	-0.263831	0.0271218	0.67223	5.71903e-10	0.423295	0.000681811	0.0761932	0.210509	0.65221	1.22023e-17	1.27372	9.86193e-47	1.07255	7.09472e-26
FBgn0005585	Calr	486.72	515.24	506.21	613.71	782.13	613.79	617.76	606.52	501.17	776.94	809.78	745.37	751.65	732.65	755.19	921.88	882.35	927.26	502.723	14.5762	669.877	97.2142	575.15	64.3146	777.363	32.2071	746.497	12.1215	910.497	24.5237	0.908244	3.83688e-14	0.539261	1.86352e-06	-0.402203	0.00424653	-0.0630992	0.562219	0.696767	3.90329e-21	0.142033	8.18311e-06	-0.00723581	0.872291	-0.121063	0.213905	0.685975	1.27956e-36
FBgn0037723	SpdS	102.71	107.6	105.05	296.82	387.85	295.57	259.91	227.4	194.73	113.72	114.51	109.9	118.01	129.7	120.65	103.01	102.22	99.96	105.12	2.44575	326.747	52.9207	227.347	32.59	112.71	2.46538	122.787	6.13091	101.73	1.58294	2.12951	5.42856e-61	1.45644	5.3592e-31	-0.706127	1.72155e-06	-1.81188	2.19283e-64	0.169672	0.0649874	-0.418867	1.65578e-09	-0.386568	7.79334e-08	-2.24768	1.41543e-100	-0.2201	0.00497694
FBgn0003334	Scm	14.11	18.99	20.68	31.76	33.64	33.97	40.23	41.48	42.2	84.03	94.98	91.05	74.3	75.7	79.66	96.38	96.6	97.82	17.9267	3.41163	33.1233	1.19215	41.3033	0.996812	90.02	5.54719	76.5533	2.78002	96.9333	0.775715	1.39276	5.92704e-24	1.55899	5.45071e-32	0.13317	0.222054	1.15997	1.34642e-49	2.40253	4.36133e-78	0.195255	8.55107e-06	-0.127416	0.0275045	0.981519	1.99303e-49	2.26974	5.92529e-70
FBgn0012344	Dh44	0.86	0.34	0.67	0	0.02	0.07	0	0	0.04	0.05	0	0	0	0.03	0	0.11	0.22	0.18	0.623333	0.263122	0.03	0.0360555	0.0133333	0.023094	0.0166667	0.0288675	0.01	0.0173205	0.17	0.0556776	-3.95547	0.000531913	-5.50529	4.23276e-05	-1.55153	NA	-0.7267	NA	-4.78541	0.00111321	4.20201	0.0246866	2.71351	0.206217	1.96076	0.26604	-2.07517	0.0111412
FBgn0037724	Fst	0.16	0.16	0.22	0.46	0.19	0	0.03	0.02	0.47	0	0	0	0	0.04	0	0	0	0	0.18	0.034641	0.216667	0.231157	0.173333	0.25697	0	0	0.0133333	0.023094	0	0	0.732882	0.640562	0.317534	0.847717	-0.458814	0.88089	-3.69984	0.186766	-3.11002	NA	0.0172467	NA	NA	NA	-4.52679	0.0891676	-3.88644	0.0597092
FBgn0037726	CG9492	0.28	0.21	0.34	0.02	0.03	0.01	0.59	0.52	0.47	0.01	0	0.02	0.01	0.01	0	0.01	0	0	0.276667	0.0650641	0.02	0.01	0.526667	0.0602771	0.01	0.01	0.00666667	0.0057735	0.00333333	0.0057735	-3.43845	1.26086e-11	1.26671	6.59529e-07	4.66975	1.58028e-36	-1.24152	0.466566	-4.98465	1.71829e-07	-0.751114	0.744895	-1.7349	0.51114	-2.92543	0.0790852	-6.43894	5.58375e-09
FBgn0263389	CG43441	0	0	0	0	0	0	0.06	0	0	0	0	0	0	0	0	0	0	0	0	0	0	0	0.02	0.034641	0	0	0	0	0	0	NA	NA	0.809155	NA	0.861696	NA	NA	NA	NA	NA	NA	NA	NA	NA	NA	NA	NA	NA
FBgn0037727	CG8358	4.33	3.83	5.47	0.17	0.26	0.34	0.26	0.32	0.81	0.16	0	0	0.04	0.02	0.02	0	0.06	0	4.54333	0.840555	0.256667	0.085049	0.463333	0.301717	0.0533333	0.092376	0.0266667	0.011547	0.02	0.034641	-3.62896	4.91158e-26	-2.93094	2.77084e-12	0.660571	0.493426	-2.52001	0.0863294	-6.30155	2.99234e-12	-0.937922	0.744877	-2.17745	0.553753	-4.78933	0.00227318	-8.53493	5.17543e-12
FBgn0037728	p23	638.33	738.85	699.05	962.92	1078.45	1028.8	888.47	901.19	844.98	1090.81	1111.19	1058.46	947.34	908.77	931.16	724.51	666.66	707.75	692.077	50.6215	1023.39	57.9547	878.213	29.4753	1086.82	26.5905	929.09	19.3681	699.64	29.7655	1.06334	1.61577e-27	0.691293	2.36086e-15	-0.405347	2.17324e-06	-0.193823	0.00669844	0.720894	1.66968e-22	-0.55319	6.89561e-46	-0.869871	6.55523e-118	-1.11512	1.02046e-67	-0.153541	0.0320509
FBgn0028997	nmdyn-D7	35.3	35.21	37.06	12.07	11.25	10.27	15.09	13.55	13.27	36.38	38.3	43.21	55.96	51.49	56.2	68.35	68.18	68.13	35.8567	1.04309	11.1967	0.901184	13.97	0.98	39.2967	3.52239	54.55	2.65275	68.22	0.115326	-1.18476	3.70834e-20	-1.01595	4.35909e-18	0.136166	0.459211	1.52795	8.71287e-33	0.193335	0.113239	0.176284	0.0101997	0.568391	4.42547e-09	2.04261	6.94016e-95	0.754906	3.9803e-19
FBgn0037730	CG9444	5.86	4.57	4.45	1.09	0.9	0.75	0.79	1.04	0.99	0.5	0.28	0.95	0.24	0.16	0.23	0	0	0.06	4.96	0.781729	0.913333	0.170392	0.94	0.132288	0.576667	0.341516	0.21	0.043589	0.02	0.034641	-1.96343	1.64027e-11	-2.05655	1.15145e-13	-0.128252	0.830817	-1.02144	0.105426	-3.17405	2.90372e-13	-3.17978	0.0357168	-4.68458	0.0011958	-5.66447	1.29964e-06	-7.69824	3.76349e-13
FBgn0069242	eca	115.57	107.16	113.25	116.11	126.39	117.35	139.56	153.93	124.53	113.35	118.43	115.55	151.99	146.53	149.68	179.36	178.62	183.96	111.993	4.34355	119.95	5.61156	139.34	14.7012	115.777	2.54757	149.4	2.74075	180.647	2.89319	0.593374	1.85468e-07	0.659082	3.26111e-07	0.0324211	0.871515	-0.331217	5.45514e-05	0.113365	0.300665	0.128879	0.0143851	0.40695	3.90567e-10	0.0240619	0.742442	0.516358	1.09698e-08
FBgn0037731	CG18542	24.26	40.61	38.89	16.61	13.94	20.66	14.89	16.49	17.45	38.79	45.7	45.92	58.32	59.18	57.98	60.2	45.54	56.65	34.5867	8.98441	17.07	3.38353	16.2767	1.29326	43.47	4.05449	58.4933	0.618493	54.13	7.64799	-0.503066	0.0381001	-0.728515	0.000274559	-0.257829	0.318478	1.05972	3.99814e-09	0.406432	0.0372943	-0.248919	0.0147745	0.0885004	0.537256	1.09392	2.67559e-09	0.485185	0.0183659
FBgn0260463	Unc-115b	54.62	64.78	63.42	0.17	0	0.31	0.09	0	0.07	7.3	16.57	10.06	0.08	0	0	0.05	0	0	60.94	5.51536	0.16	0.155242	0.0533333	0.0472582	11.31	4.75974	0.0266667	0.046188	0.0166667	0.0288675	-8.04366	3.0804e-08	-9.80133	6.53804e-153	-1.79889	0.4234	5.82872	0.000127941	-2.36036	1.12969e-22	-0.606768	0.868519	-9.44959	6.79379e-19	-3.6504	0.0845587	-11.8177	3.8776e-31
FBgn0053105	p24-2	11.46	25.18	22.28	0.09	0	0	0	0	0	4.13	8.64	4.32	0.12	0	0	0.3	0	0	19.64	7.23096	0.03	0.0519615	0	0	5.69667	2.55077	0.04	0.069282	0.1	0.173205	-9.90394	2.96304e-10	-12.7013	6.33388e-25	-3.57556	NA	8.31094	2.96435e-07	-1.70011	3.01448e-07	1.46226	0.654574	-6.43419	6.97504e-05	1.40053	0.689746	-8.14791	2.15917e-07
FBgn0052939	CG32939	0.08	0.12	0.16	0.08	0.07	0.11	0.06	0.05	0.08	0.24	0.16	0.3	0.31	0.3	0.29	0.4	0.27	0.28	0.12	0.04	0.0866667	0.0208167	0.0633333	0.0152753	0.233333	0.0702377	0.3	0.01	0.316667	0.0723418	0.0159022	0.991856	-0.468062	0.756665	-0.517371	0.821203	1.22586	0.401759	1.08451	0.379382	-0.126813	0.900562	0.182843	0.89298	1.35299	0.251657	1.25732	0.226101
FBgn0051352	Unc-115a	5.25	6.62	10.03	21.81	24.68	19.1	25.26	23.39	23.01	8.58	12.52	12.26	4.05	4.45	3.88	0	0.12	0.11	7.3	2.46148	21.8633	2.79038	23.8867	1.20442	11.12	2.20354	4.12667	0.292632	0.0766667	0.0665833	2.08939	1.75744e-24	2.06793	7.03167e-26	-0.0541312	0.763582	-1.25882	5.07036e-17	0.680076	0.006229	-6.02119	2.98362e-30	-7.53756	4.24591e-46	-8.84565	1.42429e-69	-6.8603	3.75672e-33
FBgn0037734	trbd	17.48	21.62	26.31	17.07	17.77	16.39	21.49	22.76	20.31	26.88	29.76	30.91	22.25	21.7	23.54	30.44	31.39	31.04	21.8033	4.41785	17.0767	0.690024	21.52	1.22528	29.1833	2.07597	22.4967	0.944475	30.9567	0.480451	0.153376	0.324989	0.336154	0.0256275	0.150018	0.189759	0.489733	4.15986e-08	0.493817	0.000805695	0.313311	3.23088e-07	-0.147065	0.0891251	0.290588	9.78021e-05	0.339967	0.0214964
FBgn0278604	dmt	44.49	65.93	63.69	30.98	29.1	32.08	29.07	30.65	33.83	119.34	125.38	119.24	127.75	129.92	140.16	158.09	140.44	155.46	58.0367	11.7851	30.72	1.50692	31.1833	2.4244	121.32	3.51642	132.61	6.6279	151.33	9.52225	-0.409497	0.00927393	-0.540557	0.000513871	-0.16379	0.243109	1.69939	1.20142e-95	1.13984	2.39336e-17	0.0468456	0.454585	0.0848203	0.124304	1.7323	1.12902e-97	1.21828	3.55519e-18
FBgn0002431	hyd	109.23	136.78	132.33	93.06	111.96	92.05	130.29	124.46	117.9	118.24	123.93	120.2	78.92	86.37	90.89	114.47	100.72	109.06	126.113	14.7897	99.0233	11.2149	124.217	6.19858	120.79	2.89052	85.3933	6.04447	108.083	6.92683	0.150528	0.232448	0.327811	0.00125908	0.144121	0.250774	0.00789784	0.935282	0.00949184	0.923002	0.195169	0.00285734	-0.394847	6.26839e-18	-0.438434	1.56621e-07	-0.390379	4.12034e-05
FBgn0262477	FoxP	1.7	2	2.14	0.06	0.04	0.04	0.08	0.03	0.13	0	0	0	0	0.04	0	0	0	0	1.94667	0.224796	0.0466667	0.011547	0.08	0.05	0	0	0.0133333	0.023094	0	0	-4.95656	2.48337e-22	-4.26799	5.78197e-20	0.629668	0.72652	-2.82465	NA	-7.90465	2.74285e-10	-1.62589	NA	NA	NA	-3.66804	0.141459	-8.70148	2.42742e-12
FBgn0003886	alphaTub85E	5.15	4.83	5.85	0.02	0.03	0	0.04	0	0.16	0	0	0	0	0	0	0	0	0.04	5.27667	0.521664	0.0166667	0.0152753	0.0666667	0.0832666	0	0	0	0	0.0133333	0.023094	-7.82736	4.46462e-18	-5.90003	1.30083e-26	1.86706	0.583822	-0.385469	NA	-8.40762	1.22971e-11	1.93184	NA	0.182043	NA	-0.257639	NA	-8.23027	2.62987e-11
FBgn0037736	side-VII	3.81	5.14	5.12	0.05	0.05	0.06	0.28	0.28	0.42	0.03	0.03	0.05	0.16	0.09	0.1	0	0	0.03	4.69	0.762168	0.0533333	0.0057735	0.326667	0.080829	0.0366667	0.011547	0.116667	0.0378594	0.01	0.0173205	-5.88647	2.66712e-59	-3.47353	1.30601e-46	2.37161	0.000112224	-0.993641	0.553875	-7.07142	7.51429e-16	-3.26543	0.0271996	-1.66797	0.5317	-2.66155	0.149393	-8.57734	2.51812e-16
FBgn0037737	Pnn	51.16	74.51	64.64	26.88	32.86	26.46	36.26	34.47	32	92.65	92.86	79.98	99.09	92.41	101.66	112.13	88.13	106.35	63.4367	11.7214	28.7333	3.57996	34.2433	2.13903	88.4967	7.3764	97.72	4.77476	102.203	12.5258	-0.640949	6.37709e-05	-0.538412	0.00028605	0.068825	0.730238	1.34631	1.13629e-31	0.556413	0.000132669	-0.0753785	0.431049	-0.0272424	0.818574	1.26708	2.64804e-26	0.523321	0.000601834
FBgn0085438	CG34409	10.91	8.4	10.4	0.94	0.61	0.5	0.95	0.89	1.11	0.27	0.47	0.17	0.25	0.3	0.11	0.04	0.06	0.09	9.90333	1.32666	0.683333	0.228983	0.983333	0.113725	0.303333	0.152753	0.22	0.0984886	0.0633333	0.0251661	-3.38442	4.26465e-35	-2.99094	1.13827e-42	0.354927	0.524817	-1.40456	0.0522608	-4.88009	8.33649e-32	-2.00186	0.0891213	-2.58956	0.0409972	-4.06684	5.44468e-06	-7.52887	1.18923e-27
FBgn0051415	CG31415	5.16	3.28	4.46	0.23	0.16	0.07	0.09	0.17	0.18	0	0.15	0.52	0	0.12	0.06	0	0	0	4.3	0.950158	0.153333	0.0802081	0.146667	0.0493288	0.223333	0.267644	0.06	0.06	0	0	-4.32894	1.87579e-11	-4.52861	7.16094e-13	-0.258323	0.915658	0.110608	0.959667	-4.48649	5.47276e-06	-1.46084	NA	-3.3959	0.342659	-3.26261	0.235788	-7.67112	3.434e-09
FBgn0037739	CG12948	171.9	162.57	166.12	45.4	55	44.32	69.34	69.44	61.11	61.97	64.67	62.62	98.92	92.03	98.97	116.47	110.98	118.3	166.863	4.70921	48.24	5.87918	66.63	4.78072	63.0867	1.4092	96.64	3.99246	115.25	3.80945	-1.29792	4.02284e-25	-0.981304	1.60323e-18	0.282843	0.0355642	0.108561	0.366133	-1.33754	4.12172e-40	0.111055	0.0621344	0.635656	5.46513e-20	0.691897	3.15871e-13	-0.706342	3.18023e-16
FBgn0005777	PpD3	66.67	86.61	83.71	77.91	99.95	92.78	82.16	81.63	81.82	166.57	170.76	158.57	196.6	183.31	194.66	210.31	183.25	205.43	78.9967	10.7732	90.2133	11.2419	81.87	0.268514	165.3	6.19344	191.523	7.17879	199.663	14.4223	0.694498	6.28211e-07	0.402997	0.000247266	-0.325376	0.010835	0.593183	6.32969e-09	1.13871	8.7993e-29	-0.0835307	0.168859	0.0375191	0.556181	0.57948	1.52292e-08	1.1709	4.36713e-28
FBgn0037741	CG16908	29.46	31.96	30.68	19.84	18.41	17.47	15.55	16.1	17.01	23.13	23.29	21.38	19.74	19.61	21.43	24.21	24.48	24.25	30.7	1.25012	18.5733	1.19341	16.22	0.73736	22.6	1.05958	20.26	1.01533	24.3133	0.145717	-0.228592	0.0435715	-0.572921	4.60949e-08	-0.377379	0.000142452	0.00667754	0.955838	-0.370516	0.000148574	0.116268	0.116017	-0.134188	0.133953	-0.178028	0.0516445	-0.508152	3.79847e-11
FBgn0037742	Rpt3R	105.73	109.4	107.96	2.26	2.21	1.94	5.73	5.57	6.54	2.87	2.32	2.73	1.39	2.02	1.55	3.35	3.78	2.68	107.697	1.84912	2.13667	0.172143	5.94667	0.520032	2.64	0.285832	1.65333	0.327465	3.27	0.554346	-5.1637	0	-3.83089	4.06614e-225	1.29709	2.69162e-10	0.0237407	0.954473	-5.29584	7.7725e-181	0.824555	0.0112652	0.0647377	0.879423	0.0340445	0.918862	-5.25779	8.13421e-267
FBgn0037743	CG8412	45.08	37.17	56.93	16.49	15.36	14.55	14.07	15.55	13.8	16.19	17.11	16.16	16.04	16.74	16.29	14.61	13.47	13.31	46.3933	9.94525	15.4667	0.974389	14.4733	0.942143	16.4867	0.540031	16.3567	0.35473	13.7967	0.708896	-1.0857	6.80733e-11	-1.33099	1.01855e-15	-0.277717	0.0249696	-0.18535	0.128847	-1.42348	4.52605e-17	-0.39149	2.64755e-05	-0.493837	1.70749e-05	-0.730826	3.14455e-11	-1.92128	6.61168e-29
FBgn0037744	CG8417	37.49	34.3	39.73	52.21	53.11	51.52	45.43	45	40.64	33.18	30.72	28.8	14.18	16.66	14.82	11.73	12.32	10.31	37.1733	2.72882	52.28	0.797308	43.69	2.65011	30.9	2.19554	15.22	1.28748	11.4533	1.03317	0.987985	1.66713e-17	0.577409	1.41314e-06	-0.443769	2.14413e-06	-1.03462	3.52656e-23	-0.197142	0.15586	-0.567029	0.000114994	-1.68081	1.38332e-31	-2.77263	1.1061e-133	-1.88184	6.63762e-40
FBgn0266720	Snap24	30.46	34.54	38.9	26.69	28.27	30.83	28.78	29.76	30.73	83.91	89.13	84.58	86.04	81.8	84.94	92.83	83.68	91.57	34.6333	4.22077	28.5967	2.08924	29.7567	0.975004	85.8733	2.84018	84.26	2.20027	89.36	4.9592	0.228188	0.106988	0.132537	0.286052	-0.129044	0.413766	1.30348	2.01265e-39	1.38151	1.4871e-42	-0.0567884	0.359497	-0.17558	0.00744785	1.07575	8.1899e-29	1.19958	2.73145e-31
FBgn0037746	CG8478	67.84	62.75	58.95	25.07	22.56	21.89	29.03	26.13	27.32	50.31	54.53	52.23	86.48	83.13	88.32	116.81	112.18	121.11	63.18	4.46057	23.1733	1.67638	27.4933	1.45775	52.3567	2.11285	85.9767	2.63136	116.7	4.46602	-0.955732	4.57814e-12	-0.859847	1.57196e-11	0.063231	0.678784	0.896634	1.66325e-21	-0.207767	0.097654	0.297615	2.06611e-10	0.922544	5.47284e-53	1.76719	7.66523e-108	0.710969	2.32179e-11
FBgn0024330	MED6	50.18	46.15	47.94	30.27	30.64	29.11	27.18	27.43	29.83	40.55	44.11	38.4	51.87	49.81	49.41	58	56.35	59.89	48.09	2.01918	30.0067	0.798269	28.1467	1.46316	41.02	2.88387	50.3633	1.32005	58.08	1.77136	-0.186889	0.149186	-0.428949	0.000620896	-0.275704	0.0069276	0.174825	0.101967	-0.162085	0.19775	0.0626647	0.383566	0.263375	0.00260641	0.3878	6.87344e-07	0.0994062	0.347008
FBgn0037747	CG8481	44.68	52.74	54.77	20.96	19.44	25.93	26.54	24.68	30.6	36.23	41.01	35.8	62.83	59.95	60.99	65.74	57.18	69.13	50.73	5.33686	22.11	3.39439	27.2733	3.02736	37.68	2.89187	61.2567	1.4584	64.0167	6.15857	-0.691538	3.53523e-05	-0.544219	4.58754e-05	0.11369	0.667496	0.485131	0.0028295	-0.354435	0.00244839	-0.0746199	0.387178	0.530091	2.86512e-07	0.963752	8.51549e-11	0.170171	0.143489
FBgn0037749	CG9471	112.22	95.64	96.72	94.45	98.21	92.9	97.32	91.4	88.29	63.54	64.45	63.45	95.3	93.05	91.31	109.6	107.29	109.38	101.527	9.27643	95.1867	2.73057	92.3367	4.58729	63.8133	0.553203	93.22	2.00042	108.757	1.27492	0.397567	0.00564127	0.202614	0.166298	-0.228748	0.0118326	-0.856898	4.33059e-22	-0.607666	1.22044e-05	0.0771927	0.266318	0.534369	7.2968e-11	-0.374484	1.64782e-07	-0.0765722	0.557494
FBgn0037750	Whamy	16.64	13.41	16.45	1.29	0.64	0.74	2.08	1.68	2.32	1.04	1.08	1.33	0.33	0.23	0.13	0.32	0.57	0.4	15.5	1.81248	0.89	0.35	2.02667	0.323316	1.15	0.157162	0.23	0.1	0.43	0.127671	-3.64983	4.87575e-41	-2.58963	1.49558e-39	1.02183	0.0103489	0.0889828	0.877325	-3.71438	2.74915e-45	0.724969	0.337085	-1.70709	0.00271528	-1.66541	0.0039996	-5.44606	2.34446e-64
FBgn0037751	topi	11.9	18.57	13.91	0.78	0.44	0.53	0.82	0.61	1.17	0.85	1.54	2.45	0.28	0.23	0.19	0.26	0.14	0.33	14.7933	3.42161	0.583333	0.176163	0.866667	0.282902	1.61333	0.802517	0.233333	0.0450925	0.243333	0.0960902	-4.17254	1.37421e-58	-3.74008	6.70911e-47	0.389436	0.527029	1.16434	0.0198157	-3.16683	2.38544e-25	-0.0597562	0.944557	-2.90218	1.06501e-06	-1.78641	0.00337474	-6.0043	4.9988e-64
FBgn0261599	RpS29	4934.38	3840.86	4166.73	6112.13	5663.82	6491.01	5854.37	5759.99	5998.4	2829.42	3031.98	2928.42	4570.84	4674.7	4317.47	3672.05	3470.16	3728.92	4313.99	561.436	6088.99	414.08	5870.92	120.064	2929.94	101.289	4521	183.756	3623.71	135.984	0.989435	2.94606e-10	0.783786	3.97307e-08	-0.239276	0.0266148	-1.33892	5.01626e-59	-0.497906	0.000341269	-0.464641	2.40751e-21	0.0724371	0.0633626	-1.31795	1.72422e-59	-0.428719	0.00150073
FBgn0037753	CG12947	15.4	17.62	15.39	3.95	4.07	4.53	3.7	3.22	3.32	2.9	2.31	2.96	0.44	0.97	0.76	0.31	0.15	0.07	16.1367	1.28461	4.18333	0.306159	3.41333	0.253246	2.72333	0.359212	0.723333	0.266896	0.176667	0.122202	-1.45005	2.29423e-17	-1.89556	2.78068e-33	-0.478908	0.0293176	-0.903035	0.00158757	-2.5071	3.28403e-32	-2.12496	0.00788604	-4.16579	3.06255e-11	-5.11894	2.88541e-22	-6.6773	8.12018e-46
FBgn0002868	MtnA	5.9	2.64	4.87	225.96	181.44	153.88	404.75	338.66	476.03	63.69	60.31	66.62	62.39	73.12	55.24	1.15	3.32	2.82	4.47	1.6664	187.093	36.371	406.48	68.7013	63.54	3.15767	63.5833	8.99954	2.43	1.13635	5.86208	5.21253e-114	6.83349	2.23098e-176	0.938864	3.8131e-08	-1.8394	9.69979e-28	3.87623	3.31676e-40	-4.95051	3.19697e-39	-5.03585	2.16593e-37	-6.92679	4.33838e-80	-1.12157	0.108245
FBgn0037754	CG8500	0.89	1.6	1.35	0.35	0.14	0.34	2.18	2.71	2.83	0.27	0.37	0.25	0.09	0.15	0.11	0.09	0.04	0.09	1.28	0.360139	0.276667	0.118462	2.57333	0.345881	0.296667	0.064291	0.116667	0.0305505	0.0733333	0.0288675	-1.69483	0.000342162	1.37317	2.7188e-07	3.04143	5.7073e-18	-0.181478	0.826077	-2.00844	2.12735e-05	-0.802069	0.43565	-2.21598	0.0181049	-2.45365	0.00494777	-4.21436	3.65232e-12
FBgn0037755	CG12945	15.7	25.66	27.1	31.73	33.32	34.91	27.51	29.87	33.25	101.82	102.13	102.82	46.15	50.92	55.05	54.8	52.38	55.9	22.82	6.20799	33.32	1.59	30.21	2.88506	102.257	0.511892	50.7067	4.45383	54.36	1.80078	1.05827	1.5226e-08	0.764681	9.24132e-05	-0.326625	0.0139514	1.33528	1.77074e-55	2.24335	8.57636e-39	-0.0431636	0.634584	-1.14397	1.21917e-84	0.138906	0.132698	1.09066	4.4471e-09
FBgn0037756	CG8507	87.39	107.94	98.76	290.36	288.39	296.54	237.41	251.43	230.78	342.34	345.68	326.59	387.43	389.61	402.67	346.1	313.2	334.39	98.03	10.2944	291.763	4.25237	239.873	10.5431	338.203	10.1951	393.237	8.2419	331.23	16.6761	2.07487	1.41264e-86	1.64037	8.20382e-57	-0.467336	2.33293e-08	-0.0677512	0.387421	1.85825	2.88409e-94	-0.391095	3.04246e-19	-0.264937	4.30497e-08	-0.384115	7.13156e-09	1.58869	3.11915e-74
FBgn0037757	CG8516	27.71	28.83	32.58	30.87	28.4	28.54	35.43	36.74	33.16	61.6	65.45	64.95	47.42	47.7	50.83	55.73	54.61	57.5	29.7067	2.55061	29.27	1.38741	35.11	1.81133	64	2.09344	48.65	1.89312	55.9467	1.45713	0.478443	7.08294e-06	0.589625	3.61655e-09	0.0787984	0.552754	0.847637	4.92549e-28	1.17605	2.47389e-41	0.0575962	0.301537	-0.427088	4.84915e-15	0.36836	8.59099e-07	0.743307	1.39356e-18
FBgn0037758	CG9467	35.02	37.37	37.55	30.31	27.86	31.19	33.41	35.14	35.7	58.05	60.05	56.51	58.18	58.65	59.17	71.47	73.47	70.39	36.6467	1.41161	29.7867	1.72558	34.75	1.19378	58.2033	1.77497	58.6667	0.49521	71.7767	1.56273	0.200788	0.0997119	0.270732	0.0054474	0.0368015	0.83633	0.684707	1.64831e-13	0.73673	1.15888e-20	0.143452	0.00488224	0.0647218	0.334762	0.700079	2.6085e-15	0.798123	7.46629e-31
FBgn0037759	CG8526	14.69	15.72	14.86	0.95	0.93	0.75	2.02	1.81	1.87	7.87	9.13	11.02	9.79	9.25	10.7	12.54	10.96	13.12	15.09	0.552178	0.876667	0.110151	1.9	0.108167	9.34	1.58547	9.91333	0.732826	12.2067	1.11791	-3.61344	4.63693e-83	-2.64536	5.02983e-67	0.934361	0.00115276	3.12787	5.41399e-41	-0.638388	9.44189e-05	0.16463	0.213815	0.16826	0.392193	3.24119	3.15489e-61	-0.468587	0.000148792
FBgn0037760	FBXO11	35.22	47.89	50.09	32.03	32.07	31.25	34.43	35.26	35.65	103.76	110.01	103.32	86.63	85.99	90.54	105.67	108.31	105.7	44.4	8.02585	31.7833	0.462313	35.1133	0.623084	105.697	3.74193	87.72	2.46307	106.56	1.51562	0.0235576	0.8784	0.0160909	0.916521	-0.0401536	0.72406	1.45311	1.80057e-123	1.32634	4.28424e-28	0.134556	0.00149442	-0.224398	1.36727e-06	1.17813	3.07021e-94	1.09808	1.15924e-18
FBgn0037761	CG8534	0.07	0	0	2.52	8.42	13.06	14.66	5.56	11.77	0	0.05	0	0	0.09	0	0	0	0	0.0233333	0.0404145	8	5.28254	10.6633	4.64984	0.0166667	0.0288675	0.03	0.0519615	0	0	8.69115	1.9804e-09	8.94115	1.1531e-15	0.206148	0.88759	-8.67117	6.99443e-08	-0.12826	NA	-0.947441	NA	NA	NA	-9.48266	2.44035e-09	-0.882485	NA
FBgn0037762	eloF	0.29	0.42	0.63	0.17	0.5	2.24	1.97	5	2.9	0	1.1	0.19	2.68	1.06	0.21	0	0	0	0.446667	0.171561	0.97	1.11216	3.29	1.55219	0.43	0.587963	1.31667	1.25484	0	0	1.66158	0.109389	3.2376	5.41474e-09	1.54807	0.10784	-1.44376	0.310945	0.0709549	0.958343	-6.35665	9.04226e-05	-4.82966	0.0670369	-6.35902	0.000251885	-4.81145	0.00553816
FBgn0037763	CG16904	0	0.1	0.34	3.41	1.36	9.02	5.99	15.23	9.93	0.12	0.21	0.18	2.59	1.49	0.47	0	0	0	0.146667	0.174738	4.59667	3.96548	10.3833	4.63665	0.17	0.0458258	1.51667	1.06025	0	0	5.53998	6.37222e-05	6.52538	3.57411e-10	0.969571	0.440908	-5.05593	5.77256e-07	0.323643	0.865301	-6.63813	8.32796e-06	-3.57218	0.213049	-8.68076	5.96172e-10	-3.25303	0.32406
FBgn0037764	CG9459	0.78	0.98	1.31	0.25	0.05	0.29	0.49	2.03	0.55	0	0.11	0.2	0.42	0.29	0.04	0	0	0	1.02333	0.267644	0.196667	0.128582	1.02333	0.872315	0.103333	0.100167	0.25	0.193132	0	0	-1.86556	0.038891	0.364039	0.6574	2.19784	0.046458	-1.30361	0.537601	-3.34718	0.0110144	-3.90044	0.0790612	-2.7057	0.524163	-3.99545	0.0924955	-5.9497	4.39033e-05
FBgn0037765	CG9458	19.25	22.54	21.07	0.43	0.03	0.79	6.68	10.84	6.21	0.27	1.14	0	0.79	0.53	0.13	0	0	0	20.9533	1.6481	0.416667	0.380175	7.91	2.54831	0.47	0.595735	0.483333	0.332466	0	0	-5.13885	9.48245e-07	-1.05481	3.63517e-05	4.05351	0.000763507	-0.0760597	0.965921	-5.17144	5.94413e-27	-4.84981	0.00746112	-4.90838	0.0490129	-5.07099	0.0171149	-10.3089	2.13053e-17
FBgn0262104	CG42857	47.91	54.78	52.73	1.79	1.99	0.84	226.64	228.2	204.99	24.27	39.5	27.4	0.28	0.15	0.26	0.27	0	0.33	51.8067	3.52684	1.54	0.61441	219.943	12.9734	30.39	8.04321	0.23	0.07	0.2	0.175784	-4.58183	1.12545e-69	2.43409	2.04395e-122	6.97773	1.00453e-301	4.03344	7.04228e-34	-0.693023	0.000562514	-0.200043	0.915287	-7.21982	8.91271e-24	-3.30388	0.00164056	-7.91023	5.64877e-32
FBgn0085331	CG34302	2.27	2.74	2.79	0	0	0	2.18	2.23	2.02	0	0	0	0	0	0	0	0	0	2.6	0.28688	0	0	2.14333	0.109697	0	0	0	0	0	0	-8.24108	8.42151e-10	0.0711645	0.860616	8.27959	1.6351e-09	NA	NA	-6.39711	1.60349e-06	NA	NA	NA	NA	NA	NA	-7.15594	4.57131e-08
FBgn0037766	Teh1	0.59	0.61	0.84	0.03	0.09	0.1	0.5	0.56	0.73	0	0.02	0.04	0.02	0.01	0.01	0	0	0	0.68	0.138924	0.0733333	0.0378594	0.596667	0.119304	0.02	0.02	0.0133333	0.0057735	0	0	-2.7073	1.82965e-07	0.175725	0.632173	2.84474	1.03874e-08	-2.29629	0.182233	-5.20684	4.73541e-06	-1.90965	NA	-2.74298	0.518213	-5.00164	0.00706798	-7.8343	1.00846e-09
FBgn0267336	Glut4EF	3.55	3.15	3.94	5.98	4.88	4.19	8.5	7.49	10.46	22.9	22.09	23.37	2.68	3.14	3.16	1.24	0.84	1.44	3.54667	0.395011	5.01667	0.902792	8.81667	1.51011	22.7867	0.647482	2.99333	0.271539	1.17333	0.305505	0.992996	2.29687e-08	1.6605	1.03817e-22	0.634356	0.000527223	1.90775	4.2772e-53	2.74929	4.84172e-118	-1.45169	4.04649e-13	-4.45381	4.44066e-204	-2.62606	6.99931e-31	-1.7348	6.9063e-14
FBgn0037770	Art4	33.11	43.86	45.1	63.37	67.93	69.07	64.35	68.53	71.27	126.73	135	125.78	146.94	147.7	150.04	178.67	166.42	174.48	40.69	6.59369	66.79	3.01616	68.05	3.48488	129.17	5.07122	148.227	1.61571	173.19	6.22605	1.22074	4.65457e-22	1.09595	1.83289e-18	-0.158156	0.18084	0.670075	4.40213e-18	1.74083	9.25081e-54	0.0804649	0.0585303	0.187874	4.83854e-05	0.807193	4.0059e-31	1.92382	5.4978e-65
FBgn0045473	Gr85a	0.55	0.89	0.61	0	0.02	0	0	0.02	0	0.1	0	0	0	0	0	0	0	0	0.683333	0.181475	0.00666667	0.011547	0.00666667	0.011547	0.0333333	0.057735	0	0	0	0	-5.92019	0.000110429	-5.98709	6.05429e-05	-0.100077	NA	1.99333	NA	-4.0741	0.00673641	NA	NA	-1.73308	NA	0.209037	NA	-5.81129	8.53267e-05
FBgn0037772	Spn85F	2.11	1.67	2.32	0.04	0.08	0.05	0.06	0.09	0.09	0	0.05	0.08	0.02	0.08	0.02	0.07	0.06	0.11	2.03333	0.331713	0.0566667	0.0208167	0.08	0.0173205	0.0433333	0.0404145	0.04	0.034641	0.08	0.0264575	-4.72459	1.57244e-18	-4.2847	1.60434e-19	0.416363	0.82434	-0.825546	0.709736	-5.78949	1.83049e-07	1.02546	0.538873	0.857086	0.693591	-0.0149225	0.992028	-4.82169	2.56104e-13
FBgn0037773	CG5359	41.18	45.47	41.96	15.92	13.45	14.47	12.94	12.25	12.48	36.59	35.72	30.48	30.13	29.85	31.25	38.07	35.52	40.45	42.87	2.28519	14.6133	1.24122	12.5567	0.351331	34.2633	3.30521	30.41	0.74081	38.0133	2.46549	-1.05538	7.56525e-14	-1.42614	4.2994e-33	-0.403374	0.00691914	0.954273	1.2109e-10	-0.248133	0.0624446	0.183546	0.0503965	-0.0882852	0.51926	0.815549	4.52957e-10	-0.338981	0.00120742
FBgn0053208	Mical	17.15	22.48	22.96	35.37	34.39	32.9	38.06	39.32	38.08	46.28	45.68	41.4	32.63	33.97	33.82	41.79	45.42	45.99	20.8633	3.22478	34.22	1.24374	38.4867	0.721757	44.4533	2.66123	33.4733	0.734189	44.4	2.27822	1.21766	2.51787e-26	1.23632	7.14375e-28	-0.0138531	0.912966	0.098838	0.233538	1.16609	1.3272e-23	0.260833	1.1935e-05	-0.238693	0.00104423	-0.191579	0.00932278	0.923346	4.02042e-15
FBgn0051407	CG31407	0	0	0.05	0	0.06	0.07	0	0	0	0	0.14	0.37	0	0	0	0	0	0	0.0166667	0.0288675	0.0433333	0.0378594	0	0	0.17	0.186815	0	0	0	0	1.69126	NA	-1.13919	NA	-2.86561	NA	1.81898	0.484937	3.3816	NA	NA	NA	-3.39409	0.343332	-1.56407	NA	0.0182005	NA
FBgn0027524	CG3909	64.53	63.42	60.71	51.39	59.47	47.57	54.22	54.64	50.55	54.65	52.22	52	54.84	50.78	55.54	54.41	51.43	52.44	62.8867	1.96505	52.81	6.07576	53.1367	2.24994	52.9567	1.47059	53.72	2.57006	52.76	1.51555	0.239985	0.087326	0.100233	0.434671	-0.173775	0.206507	-0.273586	0.021081	-0.181558	0.134768	-0.17044	0.035501	-0.240466	0.0161576	-0.565818	6.98407e-08	-0.425769	2.73489e-05
FBgn0037777	CG11722	47.69	45.25	43.14	35.39	37.34	34.48	28.48	26.37	27.53	31.06	33.62	28.71	37.11	36.16	39.76	30.14	30.22	32.36	45.36	2.27699	35.7367	1.46118	27.46	1.05674	31.13	2.45575	37.6767	1.8657	30.9067	1.25926	0.148785	0.336547	-0.381939	0.00769467	-0.564752	2.21697e-07	-0.472008	0.000861628	-0.472607	0.00239274	-0.428417	0.000116275	-0.250166	0.118795	-0.774114	1.13881e-10	-0.725665	5.73407e-08
FBgn0037778	mtTFB2	35.4	36.04	34.76	17.13	18.35	16.95	15.45	16.15	15.29	25.56	23.36	21.08	18.95	20.82	20.26	24.62	22.98	24.24	35.4	0.64	17.4767	0.761665	15.63	0.457384	23.3333	2.24012	20.01	0.95974	23.9467	0.858448	-0.522706	2.28388e-05	-0.834306	1.42879e-12	-0.345468	0.00324121	0.142398	0.333099	-0.52885	7.56804e-05	0.116498	0.2835	-0.201832	0.140834	-0.110579	0.339403	-0.733802	4.53576e-13
FBgn0037779	CG12811	21.78	17.99	20.47	67.09	56.51	60.47	55.34	51.92	51.14	51.32	45.24	44.86	65.02	58.99	62.41	66.7	68.1	65.97	20.08	1.92486	61.3567	5.34544	52.8	2.23401	47.14	3.62497	62.14	3.02405	66.9233	1.08242	2.10421	4.39457e-42	1.73521	1.90317e-36	-0.401047	0.000470839	-0.65874	2.71684e-07	1.2958	2.37774e-16	-0.0414653	0.642588	0.266654	0.01825	-0.443338	5.64568e-05	1.55932	2.44646e-32
FBgn0037780	ohgt	61.83	56.19	57.12	23.02	21.69	20.64	23.76	24.89	23.18	28.83	28.58	30.34	32.75	32.73	33.23	48.41	46.45	49.38	58.38	3.02376	21.7833	1.19274	23.9433	0.869617	29.25	0.952208	32.9033	0.283078	48.08	1.49262	-0.929913	2.29976e-13	-0.943223	5.03058e-15	-0.0462548	0.767786	0.143041	0.20252	-0.93488	5.52822e-15	0.404295	3.56931e-11	0.487648	6.48138e-09	0.577544	8.90254e-12	-0.453562	1.19381e-05
FBgn0037781	Fancl	24.3	26.87	24.34	4	4.9	3.6	5.47	4.13	6.19	18.13	14.79	16.46	28.32	29.06	31.61	33.85	34.04	34.8	25.17	1.47238	4.16667	0.665833	5.26333	1.04543	16.46	1.67	29.6633	1.72599	34.23	0.502693	-2.09739	2.86693e-33	-1.91141	4.09537e-24	0.152383	0.696606	1.70137	9.57449e-17	-0.545735	0.000547752	0.060923	0.560261	0.824179	6.15131e-09	2.47005	2.57125e-60	0.273489	0.0120502
FBgn0051410	Npc2e	0.93	0.98	1.22	0.09	0.08	0.08	0.1	0.04	0.16	0	0	0	0	0.2	0	0	0	0	1.04333	0.155027	0.0833333	0.0057735	0.1	0.06	0	0	0.0666667	0.11547	0	0	-3.10377	0.00312812	-2.96687	0.00314843	0.0864157	0.978978	-1.46248	NA	-4.70172	0.00318586	-1.51108	NA	NA	NA	-2.2527	0.523814	-5.44613	0.000371525
FBgn0037782	Npc2d	0.24	0.23	0.11	0.05	0	0	0	0	0	0	0	0	0	0	0	0	0	0	0.193333	0.0723418	0.0166667	0.0288675	0	0	0	0	0	0	0	0	-3.19271	0.20395	-4.2214	0.114852	-1.06186	NA	1.03155	NA	-2.30706	NA	NA	NA	NA	NA	0.241443	NA	-3.04596	0.230635
FBgn0037783	Npc2c	0.22	0.07	0.51	0	0	0	0	0	0	0	0	0	0	0	0	0	0	0	0.266667	0.223681	0	0	0	0	0	0	0	0	0	0	-4.74452	0.0630873	-4.81334	0.0481312	NA	NA	NA	NA	-2.90953	NA	NA	NA	NA	NA	NA	NA	-3.6643	0.123058
FBgn0053630	CG33630	0.12	0.08	0.18	0	0	0	0	0	0	0	0	0	0	0	0	0	0	0	0.126667	0.0503322	0	0	0	0	0	0	0	0	0	0	-3.47625	0.312135	-3.544	0.274922	NA	NA	NA	NA	-1.63597	NA	NA	NA	NA	NA	NA	NA	-2.37897	0.430363
FBgn0053631	CG33631	0	0.09	0	0	0	0	0	0	0	0	0	0	0	0	0	0	0	0	0.03	0.0519615	0	0	0	0	0	0	0	0	0	0	-1.0498	NA	-1.11682	NA	NA	NA	NA	NA	0.794564	NA	NA	NA	NA	NA	NA	NA	0.0616627	NA
FBgn0053783	CG33783	0	0	0.08	0	0	0	0	0	0	0	0	0	0	0	0	0	0	0	0.0266667	0.046188	0	0	0	0	0	0	0	0	0	0	-1.03509	NA	-1.10212	NA	NA	NA	NA	NA	0.80927	NA	NA	NA	NA	NA	NA	NA	0.0948688	NA
FBgn0053784	CG33784	0.37	0	0.28	0	0	0	0	0	0	0	0	0	0	0	0	0	0	0	0.216667	0.192959	0	0	0	0	0	0	0	0	0	0	-4.02135	0.262525	-4.08693	0.233206	NA	NA	NA	NA	-2.17994	NA	NA	NA	NA	NA	NA	NA	-2.90496	0.397111
FBgn0041105	nerfin-2	0.31	0.08	0.17	0	0	0	0	0	0	0	0	0	0	0	0	0	0	0	0.186667	0.115902	0	0	0	0	0	0	0	0	0	0	-6.13024	0.000925906	-6.19561	0.000534792	NA	NA	NA	NA	-4.28534	0.0193244	NA	NA	NA	NA	NA	NA	-5.07547	0.00405703
FBgn0037786	CG5361	0.03	0	0.05	0.23	0	0	0.08	0.02	0.03	0	0	0	0	0	0	0	0	0	0.0266667	0.0251661	0.0766667	0.132791	0.0433333	0.0321455	0	0	0	0	0	0	2.09973	0.476502	1.15372	0.619226	-0.937955	0.799988	-2.57093	NA	-0.605848	NA	NA	NA	NA	NA	-3.40827	0.426158	-1.3932	NA
FBgn0028734	Fmr1	73.82	100.18	98.9	125.13	146.16	130.64	136.59	141.03	133.93	209.99	219.05	197.08	213.97	193.34	206.58	250.73	228.21	248.01	90.9667	14.8632	133.977	10.9048	137.183	3.587	208.707	11.0411	204.63	10.4523	242.317	12.2922	1.06194	3.99792e-17	0.94555	1.67582e-15	-0.149619	0.171583	0.360068	7.08328e-06	1.27236	2.79847e-28	0.099659	0.0684078	-0.0199375	0.722739	0.289108	7.39055e-05	1.24739	2.00494e-27
FBgn0037788	CG3940	5.8	8.69	6.88	23.29	28.79	27.54	26.55	23.64	26	38.11	38.2	38.89	41.37	44.96	45.6	51.07	47.96	52.46	7.12333	1.46029	26.54	2.88314	25.3967	1.54597	38.4	0.426732	43.9767	2.28001	50.4967	2.30413	2.403	3.85793e-41	2.18698	6.77777e-41	-0.250667	0.100744	0.250268	0.0565764	2.50634	2.64692e-58	0.057641	0.503618	0.164652	0.081858	0.361476	0.00168163	2.66336	4.1271e-73
FBgn0266721	gammaSnap2	0.77	1.16	0.4	0	0.05	0.03	0.06	0.08	0.13	0.24	0	0	0.29	0.04	0.12	0	0	0	0.776667	0.380044	0.0266667	0.0251661	0.09	0.0360555	0.08	0.138564	0.15	0.127671	0	0	-4.4377	0.000683429	-2.72112	0.00410997	1.70176	0.544645	1.49459	NA	-3.14478	0.03076	-3.32451	0.182028	-2.5635	0.588014	-1.11231	NA	-5.73089	0.000232177
FBgn0051477	ATPsynepsilonL	133.47	121.96	95.88	1.78	1.62	1	63.02	49.91	57.77	0.31	0	0	0.28	0.57	0	0	0.43	0.29	117.103	19.2599	1.46667	0.411987	56.9	6.59816	0.103333	0.178979	0.283333	0.285015	0.24	0.219317	-5.85133	1.40556e-97	-0.705148	0.000299684	5.11342	2.75094e-97	-3.95961	0.0156167	-9.94476	3.78696e-16	-0.480543	0.839857	0.797769	0.819949	-3.34586	0.00826056	-9.31729	6.56915e-27
FBgn0001321	knk	1.55	2.27	1.44	0.06	0.36	0.3	0.99	0.89	0.91	0.13	0.33	0.19	0.05	0.14	0.19	0.09	0.14	0.14	1.75333	0.450814	0.24	0.158745	0.93	0.052915	0.216667	0.102632	0.126667	0.070946	0.123333	0.0288675	-2.36577	4.01544e-05	-0.566732	0.0781415	1.75817	0.00626164	-0.421735	0.708206	-2.91783	1.01833e-07	-0.195737	0.869236	-1.08059	0.338852	-1.55035	0.132401	-4.03463	4.3947e-13
FBgn0004889	tws	124.49	187.22	174.49	153.05	155.76	161.12	152.38	163.23	166.53	310.21	319.02	296.22	367.64	350.64	380.67	400.16	355.76	391.5	162.067	33.159	156.643	4.10688	160.713	7.4031	308.483	11.4977	366.317	15.0587	382.473	23.5362	0.457909	0.00206854	0.342909	0.0235766	-0.147945	0.17037	0.696326	9.19602e-23	1.00459	1.05637e-13	-0.081852	0.127398	0.0750513	0.152733	0.7201	3.10689e-25	1.07413	1.33789e-14
FBgn0037792	TAF1B	34.45	41.55	39.6	25.2	27.15	23.7	26.25	25.83	23.86	37.93	38.57	39.44	45.2	42.38	47.14	69.8	68.24	69.22	38.5333	3.66822	25.35	1.72988	25.3133	1.27602	38.6467	0.757914	44.9067	2.39352	69.0867	0.788501	-0.105117	0.365199	-0.257485	0.015893	-0.185507	0.0792682	0.327746	9.72689e-05	0.0741861	0.447394	0.476508	1.72521e-19	0.605607	1.15374e-23	0.880711	2.61353e-38	0.67399	4.63937e-17
FBgn0261817	CG42759	0.72	1.5	1.22	2.93	2.56	1.68	1.55	1.14	2.58	0.39	0	0	0.81	0.56	1.13	0.26	0.57	0.42	1.14667	0.395137	2.39	0.642106	1.75667	0.741912	0.13	0.225167	0.833333	0.285715	0.416667	0.155027	1.56412	0.03031	0.971535	0.241237	-0.623576	0.485015	-4.25664	0.0069089	-2.84448	0.106023	-1.22702	0.389449	1.19623	0.67207	-3.17059	0.0036229	-1.70323	0.169738
FBgn0086359	Invadolysin	11.18	16.77	18.04	18.07	17.3	19.11	20.93	24.07	25.09	27.65	27.59	25.48	25.25	24.48	26.15	23.5	23.52	26.49	15.33	3.64967	18.16	0.90835	23.3633	2.16816	26.9067	1.23589	25.2933	0.835843	24.5033	1.72053	0.755331	1.2836e-05	0.966806	2.99433e-08	0.178764	0.247849	0.286978	0.00747449	0.890509	7.53759e-08	-0.187193	0.0103286	-0.370057	1.92493e-05	-0.134721	0.213905	0.513961	0.00323662
FBgn0085332	CG34303	0.1	0.25	0.28	0	0	0	0.17	0	0	0	0	0	0	0	0	0	0	0	0.21	0.0964365	0	0	0.0566667	0.0981495	0	0	0	0	0	0	-3.47465	0.310873	-1.60292	0.55758	1.87435	NA	NA	NA	-1.63332	NA	NA	NA	NA	NA	NA	NA	-2.32866	0.441828
FBgn0037794	CG6254	32.64	39.56	38.01	14.92	11.65	12.2	13.75	12.5	13.65	32.32	33.5	30.43	38.05	36.16	38.06	38.86	33.21	36.77	36.7367	3.63148	12.9233	1.7509	13.3	0.694622	32.0833	1.54862	37.4233	1.09409	36.28	2.85669	-1.00759	5.38919e-12	-1.11641	2.76814e-23	-0.140854	0.473863	1.03463	1.34917e-14	-0.12115	0.281894	-0.184388	0.0179693	-0.0572178	0.589492	0.924932	3.79029e-12	-0.183419	0.0917735
FBgn0040238	Best1	11.7	16.8	16.25	32.68	30.27	31.5	47.8	48.74	46.3	46.43	49.73	51.59	19.98	23.53	22.83	19.64	20.18	21.19	14.9167	2.79926	31.4833	1.20509	47.6133	1.23066	49.25	2.61327	22.1133	1.88038	20.3367	0.786787	1.58433	1.26645e-28	2.02872	3.66516e-52	0.412336	1.98184e-06	0.36229	4.93431e-05	1.79763	6.75282e-41	-0.265807	0.00521095	-1.50854	1.20967e-80	-1.19785	4.45031e-41	0.282633	0.0607001
FBgn0037796	CG12814	0.21	0.28	0.22	4.66	6.94	5.26	10.65	8.3	10.09	0.54	0.7	0.9	0.33	0.38	0.35	0	0	0	0.236667	0.0378594	5.62	1.18186	9.68	1.22748	0.713333	0.18037	0.353333	0.0251661	0	0	5.06525	5.92684e-54	5.70002	2.93105e-87	0.597594	0.00430846	-3.28899	3.73571e-23	1.63755	0.00342787	-5.81307	6.23765e-05	-6.90128	1.30655e-06	-10.2183	7.88348e-17	-5.26075	0.000825464
FBgn0004575	Syn	0.04	0.05	0.18	0.55	0.56	0.56	0.94	0.68	0.95	0.14	0.24	0.13	0.07	0.14	0.09	0	0	0	0.09	0.0781025	0.556667	0.0057735	0.856667	0.15308	0.17	0.0608276	0.1	0.0360555	0	0	3.09683	2.95051e-08	3.55906	5.95568e-12	0.434337	0.182492	-1.98705	0.00022073	0.923912	0.315874	-5.32198	0.000775605	-6.10435	0.000210523	-8.20124	1.21542e-10	-5.19865	0.00353699
FBgn0025879	Timp	0.63	1.01	2.09	48.22	54.32	46.19	70.99	57.63	70.37	16.84	14.28	13.82	7.47	9.83	7.24	0	0	0.04	1.24333	0.757452	49.5767	4.23139	66.33	7.5408	14.98	1.62714	8.18	1.43356	0.0133333	0.023094	5.8257	6.44071e-94	6.09437	2.32757e-101	0.235776	0.0811275	-1.99849	1.7254e-57	3.67507	4.14998e-25	-8.86569	1.23799e-12	-9.83145	1.05996e-15	-11.8843	4.46234e-23	-6.15768	1.13683e-05
FBgn0037797	CG12420	0	0	0.11	0	0	0.03	0.04	0.03	0.06	0	0	0	0	0	0.05	0	0	0	0.0366667	0.0635085	0.01	0.0173205	0.0433333	0.0152753	0	0	0.0166667	0.0288675	0	0	-1.38569	NA	0.38627	0.90198	1.76835	NA	1.03155	NA	-0.52223	NA	0.0319336	NA	NA	NA	0.224256	NA	-1.29767	NA
FBgn0037798	CG12817	0.07	0.46	0.29	0	0	0	0	0	0	0	0	0	0	0	0	0	0	0	0.273333	0.195533	0	0	0	0	0	0	0	0	0	0	-5.33261	0.0151181	-5.40105	0.0102904	NA	NA	NA	NA	-3.48776	0.104589	NA	NA	NA	NA	NA	NA	-4.26129	0.0392222
FBgn0083943	CG34107	0.07	0.41	0.19	0	0	0	0	0	0	0	0	0	0	0	0	0	0	0	0.223333	0.172434	0	0	0	0	0	0	0	0	0	0	-4.17537	0.150235	-4.24331	0.123508	NA	NA	NA	NA	-2.32847	NA	NA	NA	NA	NA	NA	NA	-3.06616	0.246504
FBgn0261928	CG42795	0.71	0.61	0.88	0	0	0	0.02	0.02	0.01	0.02	0.02	0	0	0	0	0	0	0	0.733333	0.136504	0	0	0.0166667	0.0057735	0.0133333	0.011547	0	0	0	0	-9.09722	4.10185e-13	-5.02109	2.38666e-30	4.04932	0.0710695	3.76945	NA	-5.36356	3.5668e-11	NA	NA	-3.55955	0.300758	0.143063	NA	-9.05889	3.21145e-13
FBgn0037801	CG3999	0.37	0.68	0.36	0.14	0.42	0.44	0.95	1.06	1	0.11	0.09	0.05	0.12	0.09	0.14	0.02	0	0	0.47	0.181934	0.333333	0.16773	1.00333	0.0550757	0.0833333	0.0305505	0.116667	0.0251661	0.00666667	0.011547	0.0335719	0.962929	1.46544	0.00011142	1.38304	0.00559947	-2.25676	0.0212844	-2.36549	0.00460044	-3.76536	0.0243145	-3.38658	0.119176	-5.71646	9.87015e-05	-5.78783	2.53444e-05
FBgn0037802	Sirt6	15.28	24.87	21.43	13.24	15.46	14.33	15.22	17.1	16.71	32.18	34.29	31.39	46.78	48.74	48.85	45.65	42.98	44	20.5267	4.8584	14.3433	1.11006	16.3433	0.992186	32.62	1.49923	48.1233	1.16466	44.21	1.34733	-0.00890205	0.970332	0.0281405	0.902261	0.00297654	0.992058	0.905551	5.56952e-11	0.747461	5.42302e-05	-0.266524	0.00105134	0.201138	0.0865996	1.05594	1.26098e-19	0.945053	7.57717e-08
FBgn0040078	pont	152.72	152.83	135.16	148.51	176.5	147.89	136.02	126.78	122.19	116.45	116.13	115.26	134.77	130.63	138.18	157.84	154.84	164.89	146.903	10.1702	157.633	16.342	128.33	7.04408	115.947	0.615819	134.527	3.78088	159.19	5.15922	0.592782	7.94031e-06	0.146418	0.26213	-0.480209	1.41122e-06	-0.721862	1.18142e-17	-0.276601	0.0145717	0.0991739	0.0372809	0.223535	5.5979e-05	-0.550501	3.46168e-12	-0.0572203	0.584601
FBgn0262617	CG43143	19.88	25.32	28.34	21.18	19.49	19.06	27.27	26.47	28.34	18.84	19.85	19.4	11.08	12.14	11.13	18.21	17.29	17.27	24.5133	4.2873	19.91	1.12067	27.36	0.938243	19.3633	0.505997	11.45	0.59808	17.59	0.537029	0.205133	0.141162	0.512476	5.11115e-05	0.275137	0.00124988	-0.320608	0.000158602	-0.266041	0.0396888	0.474348	1.33959e-10	-0.373232	1.51438e-07	-0.745318	1.75161e-20	-0.644496	6.21608e-07
FBgn0037807	CG6293	19.9	24.58	30.83	84.08	65.09	85.48	40.19	47.4	46.16	132.89	139.62	130.03	162.81	161.41	168.2	157.55	160.69	170.03	25.1033	5.48376	78.2167	11.3896	44.5833	3.85492	134.18	4.92342	164.14	3.58507	162.757	6.4916	2.15062	2.30514e-34	1.18537	6.68075e-14	-0.997217	1.08502e-11	0.494191	7.91347e-05	2.49314	1.66633e-71	-0.156805	0.000597493	0.0430662	0.478222	0.486676	0.000102607	2.5309	4.2821e-69
FBgn0266717	Bruce	57.14	60.7	70.91	42.27	41.29	40.97	58.18	55.8	54.3	62.45	63.69	58.41	38.86	42.79	44.28	56.73	50.15	50.9	62.9167	7.14762	41.51	0.677348	56.0933	1.95656	61.5167	2.76097	41.9767	2.80004	52.5933	3.60203	-0.0984153	0.363405	0.183889	0.0611309	0.249697	0.000435968	0.28712	1.79125e-05	0.0384936	0.709517	0.180635	0.00857044	-0.461338	1.29158e-16	-0.22561	0.00137098	-0.427707	2.52825e-05
FBgn0037809	CG12818	53.25	53.84	47.77	11.42	14.91	12.42	15.62	12.74	15.21	30.07	32.06	28.92	37.6	36.54	39.61	45.57	40.12	43.68	51.62	3.34722	12.9167	1.79723	14.5233	1.55796	30.35	1.58862	37.9167	1.55931	43.1233	2.76732	-1.50409	3.54853e-20	-1.4874	4.29108e-23	-0.0180087	0.956108	0.953349	4.05226e-09	-0.697327	6.55622e-07	0.0461461	0.665247	0.271459	0.0338452	1.17337	1.35401e-16	-0.428859	0.000467346
FBgn0037810	sle	211.37	261.85	239.98	163.88	169.95	161.89	155.49	150.04	156.39	277.84	285.29	238.18	311.67	297.04	330.88	328.98	277.84	318.05	237.733	25.3149	165.24	4.19858	153.973	3.43596	267.103	25.3238	313.197	16.9716	308.29	26.9308	-0.024759	0.833966	-0.277885	0.00560087	-0.286265	7.41694e-06	0.412973	8.31507e-07	0.239371	0.0338685	-0.167443	0.0100509	-0.0286569	0.735921	0.332727	3.39676e-06	0.206115	0.0430856
FBgn0037811	CG12592	15.16	12.29	15.03	11.86	12.03	7.77	10.41	10.55	8.43	23.1	25.01	27.72	18.11	16.2	22.51	26.67	30.91	24.63	14.16	1.62077	10.5533	2.41194	9.79667	1.18564	25.2767	2.32152	18.94	3.23585	27.4033	3.20358	0.0626377	0.790082	-0.190125	0.302089	-0.285052	0.242171	0.983073	5.95546e-09	0.8956	3.90857e-09	0.385269	0.00632897	-0.118194	0.419593	0.81439	5.47668e-06	0.77481	1.44488e-06
FBgn0037812	CG18545	4.53	3.74	3.7	1.02	1.35	1.56	1.92	1.56	1.64	0.76	0.16	0.29	0.2	0.34	0.31	0	0	0	3.99	0.468081	1.31	0.272213	1.70667	0.189033	0.403333	0.315647	0.283333	0.0737111	0	0	-1.11643	0.0131786	-0.905289	0.0217901	0.17705	0.828361	-1.9888	0.0573425	-3.26113	3.06094e-05	-3.54644	0.107274	-4.15284	0.10035	-6.19238	2.98906e-05	-7.41322	1.10761e-08
FBgn0051406	CG31406	0.56	0.87	0.42	0.03	0.04	0	0	0.05	0	0.2	0	0	0.04	0	0	0	0	0	0.616667	0.23029	0.0233333	0.0208167	0.0166667	0.0288675	0.0666667	0.11547	0.0133333	0.023094	0	0	-4.25916	0.00575086	-5.11748	0.00207458	-0.901172	NA	1.19992	NA	-3.20058	0.0540427	0.1413	NA	-1.86643	NA	-0.716925	NA	-5.05979	0.00220628
FBgn0015396	jumu	55.76	103.76	88.72	38.97	34.61	46.04	45.12	43.43	62.28	101.64	105.98	101.04	100.96	100.31	105.61	115.03	116.25	120.54	82.7467	24.5512	39.8733	5.7683	50.2767	10.4295	102.887	2.69565	102.293	2.89065	117.273	2.89403	-0.538623	0.0143332	-0.359847	0.12579	0.145436	0.587966	1.08208	1.82501e-19	0.393921	0.038145	0.0522707	0.239989	-0.0464743	0.358018	0.985358	1.96313e-16	0.342341	0.0826603
FBgn0020379	Rfx	8.82	12.85	12.33	11.13	9.48	10.62	10.93	10.84	12.23	15	19.19	17.18	14.06	15.75	15.16	17.56	18.73	18.74	11.3333	2.19208	10.41	0.844808	11.3333	0.777839	17.1233	2.09557	14.99	0.85773	18.3433	0.678405	0.384517	0.0226743	0.35532	0.0261256	-0.0612287	0.756489	0.436007	0.000869293	0.670273	2.39432e-05	0.14428	0.0888302	-0.136072	0.242574	0.249129	0.0293983	0.530096	0.000308371
FBgn0259938	cwo	9.61	17.13	15.24	36.79	34.63	43.48	32.52	31.76	38.48	30.76	36.96	35.24	20.91	25.26	23.81	15.3	14.16	14.94	13.9933	3.91193	38.3	4.61418	34.2533	3.68007	34.32	3.20075	23.3267	2.21491	14.8	0.582752	1.96664	2.90845e-23	1.65016	4.80387e-18	-0.349373	0.0279602	-0.444511	0.000390037	1.37255	1.22518e-13	-0.800374	9.57913e-20	-1.44558	8.07132e-67	-1.94148	6.18697e-62	-0.0798668	0.693277
FBgn0045443	mthl11	0.14	0.3	0.11	0.02	0.1	0.03	0.06	0.02	0.08	0.07	0	0	0.05	0.03	0.02	0	0	0	0.183333	0.102144	0.05	0.043589	0.0533333	0.0305505	0.0233333	0.0404145	0.0333333	0.0152753	0	0	-1.3666	0.326668	-1.49561	0.25309	-0.164595	0.956108	-1.10852	NA	-2.64512	0.154606	-1.91787	NA	-1.75033	NA	-2.90555	0.352399	-4.39923	0.0217045
FBgn0037814	CG6325	48.97	63.64	62.14	13.4	12.65	12.98	19.6	17.8	18.08	20.96	22.59	25.02	21.27	20.94	24.02	56.08	51.88	56.01	58.25	8.07164	13.01	0.375899	18.4933	0.968573	22.8567	2.04309	22.0767	1.69105	54.6567	2.40492	-1.65943	5.40871e-45	-1.30458	1.63047e-31	0.322579	0.00100936	0.52799	6.52859e-07	-1.27996	5.67048e-27	1.1643	1.22394e-73	1.03052	1.8326e-38	1.50526	2.08328e-86	-0.258076	0.0166827
FBgn0024957	Irp-1B	41.45	34.45	39.19	41.56	40.58	45.83	46.5	49.86	48.93	68.08	60.77	54.55	50.34	53.36	55.14	72.8	76.14	74.39	38.3633	3.57247	42.6567	2.79153	48.43	1.73491	61.1333	6.77231	52.9467	2.42655	74.4433	1.67064	0.648487	9.61566e-06	0.678827	1.95621e-07	-0.00322716	0.987935	0.238791	0.0513731	0.737789	3.52304e-07	0.345021	1.30303e-09	0.0461	0.644361	0.234088	0.0128114	0.781154	2.91311e-11
FBgn0037815	Rrp46	52.24	43.52	42.03	75.82	102.53	76.1	71.64	60.52	57.33	38.88	37.23	43.14	25.69	26.95	25.15	18.87	24.44	20.82	45.93	5.51517	84.8167	15.3408	63.1633	7.51229	39.75	3.04954	25.93	0.923688	21.3767	2.82642	1.37087	3.43355e-14	0.796394	2.1357e-06	-0.608851	0.000130901	-1.37637	7.08625e-21	-0.151651	0.405389	-0.440816	0.00261151	-1.13787	1.04695e-11	-2.56434	5.43414e-59	-1.28971	3.1396e-12
FBgn0037816	CG6345	19.32	16.62	16.2	15.7	16.23	13.82	12.46	10.83	10.86	8	8.82	7.78	3.96	4.53	4.18	2.52	3.2	2.32	17.38	1.69316	15.25	1.26645	11.3833	0.932541	8.2	0.548088	4.22333	0.28746	2.68	0.461303	0.300007	0.080144	-0.271745	0.114512	-0.605605	7.63676e-07	-1.16763	1.22358e-14	-1.01718	1.67087e-08	-0.830985	0.000317475	-1.87855	1.49706e-15	-3.11016	1.09788e-65	-2.90318	1.78946e-44
FBgn0278600	CG46270	0.46	0	0.29	0	0	0	0	0	0	0	0	0	0	0	0	0	0	0	0.25	0.232594	0	0	0	0	0	0	0	0	0	0	-3.09769	NA	-3.16291	NA	NA	NA	NA	NA	-1.25511	NA	NA	NA	NA	NA	NA	NA	-1.85337	NA
FBgn0037817	Cyp12e1	0.05	0.32	0.33	2.23	1.38	1.79	2.93	2.25	2.59	0.07	0.18	0.22	0.4	0.36	0.46	0	0	0	0.233333	0.15885	1.8	0.425088	2.59	0.34	0.156667	0.0776745	0.406667	0.0503322	0	0	3.47303	2.69726e-09	3.84352	1.27032e-14	0.345277	0.389045	-3.85111	6.49557e-07	-0.515771	0.692114	-5.5238	0.00025362	-4.21991	0.081783	-8.09236	3.988e-10	-4.73024	0.0153135
FBgn0001235	hth	2.93	4.76	5.28	1.23	0.83	1.19	1.44	1.01	1.86	0.21	0.15	0.31	0.07	0.12	0.05	0	0	0	4.32333	1.23436	1.08333	0.220303	1.43667	0.42501	0.223333	0.080829	0.08	0.0360555	0	0	-1.47948	3.54668e-08	-1.23153	1.48589e-05	0.215149	0.638265	-2.64325	1.00647e-09	-4.28384	2.61038e-30	-4.76744	0.00566613	-6.31207	3.56127e-05	-8.96106	9.18419e-13	-10.5455	1.18635e-17
FBgn0037818	CG6465	0	0	0.05	1.1	0.07	0	1.14	0.26	0.71	0.42	0.07	0.64	0.09	0.21	0.05	0	0	0	0.0166667	0.0288675	0.39	0.615873	0.703333	0.440038	0.376667	0.28746	0.116667	0.0832666	0	0	4.91756	0.0240312	5.56603	6.17331e-05	0.704764	0.746219	-0.322692	0.860959	4.38996	0.0118022	-3.50359	0.131566	-5.23428	0.00958931	-5.61497	0.0205572	-0.758741	NA
FBgn0037819	CG14688	0.92	1.78	0.88	78.23	95.34	81.28	48.95	47.52	43	60.25	62.61	66.1	64.25	64.13	63.15	1.28	1.53	2.31	1.19333	0.508462	84.95	9.12632	46.49	3.10585	62.9867	2.94313	63.8433	0.603435	1.70667	0.537246	6.68731	5.43117e-198	5.66667	1.12314e-139	-1.05395	6.57984e-22	-0.713906	9.92871e-12	5.82808	4.67129e-157	-5.31939	7.1426e-174	-5.39403	1.48678e-147	-6.15748	1.00083e-193	0.372717	0.492416
FBgn0262717	Skeletor	0.35	0.36	0.3	0.68	0.86	0.61	0.74	0.38	0.63	0.24	0.29	0.12	0.27	0.57	0.23	0.03	0	0	0.336667	0.0321455	0.716667	0.12897	0.583333	0.184481	0.216667	0.0873689	0.356667	0.185831	0.01	0.0173205	1.59717	3.89979e-05	1.13479	0.0112673	-0.498376	0.31962	-1.93528	0.0002793	-0.495835	0.412906	-5.03889	7.47034e-05	-4.45069	0.0021456	-6.46251	7.04284e-09	-4.974	3.11756e-05
FBgn0020385	pug	9.7	11.19	11.43	12.36	12.74	9.93	13.88	13.98	11.63	14.96	15.4	16.93	8.52	8.83	9.07	11.1	11.24	11.52	10.7733	0.937248	11.6767	1.52454	13.1633	1.32885	15.7633	1.03404	8.80667	0.275741	11.2867	0.213854	0.613868	9.01422e-06	0.638065	9.08509e-07	-0.00822679	0.974812	0.151295	0.284288	0.615166	1.60695e-07	0.210979	0.0331898	-0.711913	1.50986e-10	-0.613656	1.00392e-06	-0.102134	0.374817
FBgn0037822	CG14683	84.87	70.49	75.64	129.81	134.46	129.89	119.35	116.96	114.87	105.97	114.78	120.71	166.69	163.5	165.44	155.15	147.6	151.88	77	7.28583	131.387	2.66189	117.06	2.24167	113.82	7.41674	165.21	1.60739	151.543	3.78624	1.26233	2.26073e-21	0.944806	1.95521e-13	-0.351229	6.2728e-07	-0.490522	1.57189e-10	0.624673	2.41048e-06	-0.268901	8.82616e-10	0.181889	0.00841606	-0.360549	1.03361e-09	0.801064	1.45129e-11
FBgn0051391	CG31391	2.91	4.11	3.34	0.35	0.38	0.1	0.52	0.31	0.5	0.74	0.29	0.61	0.28	0.1	0.18	0.05	0.15	0.04	3.45333	0.607975	0.276667	0.153731	0.443333	0.115902	0.546667	0.231589	0.186667	0.090185	0.08	0.0608276	-3.15359	5.8326e-12	-2.62188	4.23591e-14	0.498838	0.640632	0.711141	0.453535	-2.61799	1.17495e-08	-1.55452	0.253224	-3.21356	0.00750035	-2.52967	0.0465156	-5.89729	1.58468e-13
FBgn0051467	CG31467	13.58	15.99	15.45	5.18	3.69	3.84	4.11	4.72	4.4	2.64	2.15	1.95	1.38	1.64	1.37	0.41	0.7	0.74	15.0067	1.26469	4.23667	0.820386	4.41	0.305123	2.24667	0.355012	1.46333	0.15308	0.616667	0.180093	-1.32772	5.00365e-12	-1.41588	1.55137e-20	-0.121164	0.724441	-1.18147	0.000179758	-2.65198	7.49201e-34	-1.40507	0.0015115	-2.12149	1.34828e-05	-3.36077	5.28855e-19	-4.78715	2.57899e-63
FBgn0037824	CG14684	8.28	9.11	11.12	5.26	4.69	3.38	4.67	4.5	3.85	2.66	1.37	3.23	0.74	1.54	0.95	1.07	1.06	0	9.50333	1.46029	4.44333	0.963967	4.34	0.432782	2.42	0.952943	1.07667	0.414769	0.71	0.614898	-0.600989	0.0785958	-0.781756	0.00956879	-0.212145	0.697553	-1.1954	0.0466137	-1.96064	2.80467e-05	-0.845797	0.490852	-2.08037	0.0792538	-3.35301	3.64509e-05	-4.10159	8.83544e-10
FBgn0051278	CG31278	16.31	19.88	19.32	19.77	21.64	19.64	18.22	15.93	17.15	16.61	16.07	14.19	13.14	15.43	12.69	11.61	11.07	12.67	18.5033	1.92001	20.35	1.11906	17.1	1.14582	15.6233	1.27033	13.7533	1.46936	11.7833	0.813962	0.63848	2.22603e-05	0.235215	0.142798	-0.436953	0.0017527	-0.653457	0.000193847	-0.164489	0.375158	-0.361092	0.0546003	-0.642723	0.00230376	-1.34754	3.73285e-17	-0.811817	1.39919e-06
FBgn0051373	CG31373	11.26	11	10.51	37.47	23.87	27.2	39.58	35.05	36.44	15.77	14.73	11.07	13.07	12.04	11.44	5.01	6.06	4.81	10.9233	0.380832	29.5133	7.08898	37.0233	2.32065	13.8567	2.46871	12.1833	0.824399	5.29333	0.671441	1.92795	1.03819e-17	2.10442	3.80671e-44	0.144934	0.612211	-1.35703	2.81618e-08	0.424171	0.0778766	-1.3773	3.94544e-09	-1.65553	2.35483e-08	-3.06971	2.0609e-32	-1.24422	6.66691e-07
FBgn0037826	CG14689	0.14	0.29	0.28	0.06	0.01	0	0.13	0.08	0.12	0	0	0	0	0	0	0	0	0	0.236667	0.083865	0.0233333	0.0321455	0.11	0.0264575	0	0	0	0	0	0	-2.90913	0.0514159	-0.730372	0.459828	2.14614	0.288831	-0.995061	NA	-3.99598	0.0298925	NA	NA	NA	NA	-1.83336	NA	-4.78409	0.00622416
FBgn0037827	CG4073	0	0	0.17	0	0	0	0	0	0	0	0	0	0	0	0	0	0	0	0.0566667	0.0981495	0	0	0	0	0	0	0	0	0	0	-3.08674	NA	-3.15736	NA	NA	NA	NA	NA	-1.26235	NA	NA	NA	NA	NA	NA	NA	-2.05063	0.630852
FBgn0037828	tomboy20	0	0	0	0	0	0	0	0	0	0	0	0	0	0	0	0	0	0	0	0	0	0	0	0	0	0	0	0	0	0	NA	NA	NA	NA	NA	NA	NA	NA	NA	NA	NA	NA	NA	NA	NA	NA	NA	NA
FBgn0004841	TkR86C	0.25	0.35	0.42	0	0.01	0.05	0.01	0.04	0.02	0	0	0	0	0.03	0	0	0	0	0.34	0.08544	0.02	0.0264575	0.0233333	0.0152753	0	0	0.01	0.0173205	0	0	-3.68694	0.000848161	-3.43583	0.000119874	0.180381	0.961445	-1.5632	NA	-5.39383	0.000254224	-1.11337	NA	NA	NA	-2.40067	0.581713	-6.19233	1.45725e-05
FBgn0037829	CG14691	0	0.09	0	0.02	0	0	0	0	0	0	0	0	0	0	0	0	0	0	0.03	0.0519615	0.00666667	0.011547	0	0	0	0	0	0	0	0	-1.8279	NA	-2.86286	NA	-1.06575	NA	1.02765	NA	-0.93815	NA	NA	NA	NA	NA	0.194735	NA	-1.72242	NA
FBgn0051272	CG31272	0.41	0.36	0.43	2.09	0.05	0	1.35	0.34	3.93	0	0.05	0.16	0	0	0	0	0	0	0.4	0.0360555	0.713333	1.19249	1.87333	1.85133	0.07	0.0818535	0	0	0	0	1.31781	NA	2.57591	0.000480089	1.22979	0.747728	-3.66637	NA	-2.65972	0.0233265	NA	NA	-3.43665	0.334081	-7.14746	NA	-5.92377	4.36909e-05
FBgn0051390	MED7	121.23	107.13	104.77	47.91	54.89	42.56	46.18	44.3	39.62	50.82	49.17	51.15	77.51	73.02	77.16	56.96	59.77	56.71	111.043	8.90048	48.4533	6.18293	43.3667	3.37813	50.38	1.0608	75.8967	2.49741	57.8133	1.69913	-0.70814	3.52885e-06	-1.017	3.79332e-13	-0.342781	0.0147873	-0.222903	0.0965088	-1.07849	3.74487e-15	-0.544031	7.57146e-13	-0.037916	0.761541	-0.312161	0.00943523	-1.11912	3.93601e-19
FBgn0037831	Cap-H2	14.55	20.55	21.74	38.1	38.78	35.17	32.54	29.84	35.25	9.96	10.37	11.27	8.11	10.93	10.59	7.25	5.4	6.48	18.9467	3.85383	37.35	1.91831	32.5433	2.705	10.5333	0.670099	9.87667	1.53939	6.37667	0.929319	1.48518	2.30081e-26	1.13589	2.42742e-14	-0.382148	6.16445e-05	-2.1111	1.35648e-120	-0.772339	9.7449e-07	-0.771321	5.52229e-07	-0.950893	1.85444e-11	-3.10579	4.24806e-198	-1.73246	6.84977e-23
FBgn0010421	TfIIFbeta	32.75	33.51	34.77	27.09	31.46	32.14	35.13	37.03	39.36	113.82	125.19	114.58	91.97	98.45	102.2	129.23	120.89	132.39	33.6767	1.02026	30.23	2.74049	37.1733	2.11864	117.863	6.35645	97.54	5.17536	127.503	5.94126	0.34374	0.0167762	0.489701	4.15867e-05	0.111522	0.556454	1.68002	1.74603e-54	1.87522	2.18442e-87	0.244017	0.000216157	-0.120671	0.104171	1.5081	1.43753e-50	1.75025	3.63653e-100
FBgn0266446	CG45076	0.2	0.29	0.21	64	54.12	47.17	80.52	71.95	81.65	2.79	2.83	2.62	4.94	4.96	4.03	0.06	0	0	0.233333	0.0493288	55.0967	8.4574	78.04	5.30427	2.74667	0.111505	4.64333	0.531256	0.02	0.034641	8.38775	7.28648e-188	8.74283	2.40526e-232	0.32134	0.019712	-4.59585	2.97455e-131	3.63048	1.17191e-18	-8.0915	4.1225e-11	-7.4213	3.97274e-09	-12.0803	8.49004e-25	-3.79129	0.0162356
FBgn0266451	fau	0.04	0.2	0.15	74.43	71.67	83.96	119.7	104.52	146.12	7.22	6.92	8.61	11.41	14.94	11.62	0	0	0.13	0.13	0.0818535	76.6867	6.44829	123.447	21.0516	7.58333	0.901684	12.6567	1.98021	0.0433333	0.0750555	9.82509	5.44181e-83	10.3578	1.27355e-90	0.499128	0.00227455	-3.64557	5.01903e-104	6.03942	2.40965e-25	-7.97741	4.93514e-14	-7.32501	1.31724e-11	-10.9963	2.78414e-27	-1.43131	0.512642
FBgn0266448	CG45078	0	0.07	0.09	21.55	18	21.63	37.48	36.31	46	2.69	2.3	1.44	1.39	2.38	2.02	0	0	0	0.0533333	0.0472582	20.3933	2.07307	39.93	5.28922	2.14333	0.639557	1.93	0.501099	0	0	9.03708	1.5348e-61	9.85286	1.81355e-74	0.783343	1.27654e-07	-3.49889	2.06228e-56	5.36757	4.04239e-14	-8.03865	5.23054e-10	-8.28041	2.9432e-10	-11.8602	8.85963e-23	-2.91292	0.403209
FBgn0037832	Desi	0.42	0.15	0.22	0.26	0.37	0.18	0.09	0.06	0.08	0	0.1	0.18	0.08	0.13	0.04	0	0	0	0.263333	0.140119	0.27	0.0953939	0.0766667	0.0152753	0.0933333	0.090185	0.0833333	0.0450925	0	0	0.488516	0.663435	-1.48398	0.261544	-2.01025	0.129173	-1.90654	0.289091	-1.56807	0.355548	-2.48624	NA	-2.71099	0.523138	-4.58583	0.0198058	-4.1937	0.0370958
FBgn0261356	CG42633	4.6	8.07	6.07	0.42	0.34	0.59	0.36	0.3	0.47	0.21	0.09	0	0.11	0	0.1	0.07	0	0	6.24667	1.74173	0.45	0.127671	0.376667	0.0862168	0.1	0.105357	0.07	0.0608276	0.0233333	0.0404145	-3.27174	1.94993e-16	-3.68381	2.41747e-21	-0.453434	0.66346	-2.36476	0.0933259	-5.74586	6.31072e-10	-1.46324	0.62963	-2.09822	0.517779	-4.58342	0.00404027	-7.95282	2.42204e-10
FBgn0261380	mRpL37	70.15	72.03	67.52	82.72	92.86	75.51	72.29	67.24	61.87	71.73	71.68	68.72	68.98	71.88	72.09	86.92	83.39	84.71	69.9	2.26537	83.6967	8.71614	67.1333	5.21082	70.71	1.72357	70.9833	1.73811	85.0067	1.7836	0.752704	3.36363e-10	0.28493	0.0159216	-0.501102	3.89921e-06	-0.520321	4.53926e-08	0.0842697	0.434895	0.115068	0.0708592	0.0292362	0.724354	-0.542206	3.60576e-10	0.110447	0.218229
FBgn0260944	Rbp1	146.37	179.25	142.73	265.82	293.2	193.53	249.02	256.56	186.21	143.16	137.47	154.79	203.44	186.5	204.51	204.18	203.97	209.8	156.117	20.1166	250.85	51.4937	230.597	38.6244	145.14	8.82813	198.15	10.1034	205.983	3.307	1.17515	3.07491e-12	0.907632	2.62575e-08	-0.299778	0.155418	-1.06551	1.13977e-15	-0.0377681	0.786021	-0.0890329	0.148903	0.274501	0.000541653	-0.845669	7.44422e-11	0.23059	0.044462
FBgn0037834	Art1	184.88	222.96	201.25	219.15	285.1	234.93	249.32	240.02	234.24	265.2	277.51	251.75	307.95	308.34	324.09	350.8	339.79	348.9	203.03	19.1023	246.393	34.437	241.193	7.60816	264.82	12.8842	313.46	9.20792	346.497	5.88532	0.776429	2.29944e-09	0.596078	7.27909e-10	-0.214244	0.111303	-0.174349	0.104098	0.453969	9.60547e-07	-0.000163031	0.997812	0.151147	0.00131445	-0.072712	0.475518	0.60242	1.12427e-14
FBgn0017577	Mcm5	109.52	146.61	113.44	96.22	93.45	81.6	85.68	76.42	79.63	162.57	160.36	160.23	273.95	275.64	292.23	310.69	310.95	308.64	123.19	20.3768	90.4233	7.76573	80.5767	4.70202	161.053	1.31508	280.607	10.1015	310.093	1.26532	0.0508538	0.754599	-0.265745	0.0643925	-0.349198	0.000103457	0.554267	1.47688e-13	0.45745	0.000279262	-0.00107599	0.983679	0.710363	6.13354e-61	1.21297	3.62806e-68	1.164	4.96041e-23
FBgn0037835	CG14687	2.29	1.54	2.18	35.29	38.6	30.83	38.71	37.04	36.22	3.46	3.26	6.5	3.29	3.94	3.06	0	0	0	2.00333	0.40501	34.9067	3.89916	37.3233	1.26895	4.40667	1.81564	3.43	0.456399	0	0	4.60316	1.65961e-93	4.54971	9.17712e-106	-0.0863182	0.642363	-3.33653	1.94178e-38	1.16319	0.0134981	-7.35234	2.0984e-08	-7.78637	1.00566e-08	-11.1183	3.81344e-20	-6.60772	1.46981e-06
FBgn0037836	CG14692	0.23	0.41	0.4	0.04	0.17	0.08	0.17	0.13	0.16	0.24	0.35	0.15	0.01	0	0.01	0	0	0	0.346667	0.10116	0.0966667	0.0665833	0.153333	0.0208167	0.246667	0.100167	0.00666667	0.0057735	0	0	-1.37835	0.020671	-0.785404	0.0449308	0.556003	0.526245	1.15641	0.105337	-0.3569	0.448631	-2.18057	NA	-7.41711	1.09706e-07	-6.30772	6.01103e-05	-7.8023	1.83611e-09
FBgn0037837	CG14693	1.21	1.37	1.15	0	0.04	0	0.03	0.1	0.12	0.07	0	0.31	0.04	0	0	0	0	0	1.24333	0.113725	0.0133333	0.023094	0.0833333	0.0472582	0.126667	0.162583	0.0133333	0.023094	0	0	-5.88582	5.13559e-08	-3.48895	3.73601e-07	2.40508	0.396981	2.80334	0.319333	-3.79746	0.000273625	-0.174266	NA	-3.84383	0.241882	-1.00915	NA	-7.18386	5.58376e-08
FBgn0037838	TTLL15	4.97	8.13	7.23	4.46	4.53	4.92	5.44	4.62	6.01	16.79	14.04	13.59	23.44	21.06	24.17	28.9	27.44	27.21	6.77667	1.62805	4.63667	0.247857	5.35667	0.698737	14.8067	1.73229	22.89	1.62631	27.85	0.91657	-0.0368882	0.887674	0.0179247	0.946218	0.0218707	0.948396	1.39663	1.3326e-16	1.20986	4.1945e-09	0.137447	0.139839	0.671783	1.25267e-07	2.01795	7.9074e-62	1.87791	3.08427e-27
FBgn0261053	Cad86C	1.18	1.27	1.79	6.23	7.63	6.52	8.06	6.37	7.16	3	2.6	2.64	0.52	0.7	0.57	0	0	0	1.41333	0.329292	6.79333	0.738941	7.19667	0.845596	2.74667	0.220303	0.596667	0.0929157	0	0	2.76562	1.64991e-57	2.69622	3.54376e-55	-0.102997	0.600315	-1.58459	6.00361e-29	1.03074	1.21893e-06	-8.23209	1.10207e-10	-10.5271	8.75554e-18	-12.1637	5.20221e-24	-9.50189	1.63541e-14
FBgn0259740	CG42394	0.57	2.34	2.15	11.66	13.66	16.35	23.79	16.98	30.72	4.68	1.8	2.72	4.3	5.5	4.22	0.29	0	0	1.68667	0.971717	13.89	2.35344	23.83	6.87009	3.06667	1.47096	4.67333	0.717031	0.0966667	0.167432	3.56944	3.17799e-17	4.19098	7.79484e-25	0.587873	0.0637442	-2.46369	7.46175e-09	0.961686	0.198649	-5.58401	8.35864e-07	-5.06736	0.000152279	-7.5821	6.30817e-13	-4.11147	0.0039449
FBgn0037841	CG4565	16.43	18.63	15.68	4.65	6	4.05	4.56	5.74	4.27	3.27	2.71	2.21	3.62	3.16	3.54	1.5	1.17	1.68	16.9133	1.53324	4.9	0.998749	4.85667	0.77861	2.73	0.530283	3.44	0.245764	1.45	0.25865	-1.28817	1.44268e-08	-1.45069	2.2603e-11	-0.195688	0.641919	-1.07513	0.00647528	-2.50771	1.04226e-18	-1.36841	0.000508704	-1.17956	0.0313252	-2.30248	5.01533e-09	-3.67964	4.33676e-36
FBgn0037842	CG6567	36.49	31.88	33.38	44.1	50.91	41.8	51.09	48.93	40.88	54.5	60.55	49.89	69.67	65.26	68.64	70	68.85	74.81	33.9167	2.35139	45.6033	4.73741	46.9667	5.38071	54.98	5.34619	67.8567	2.307	71.22	3.16176	0.916835	4.08422e-10	0.809248	7.99325e-08	-0.141116	0.440148	-0.00539246	0.971138	0.761622	1.74997e-07	-0.0720341	0.368717	0.135073	0.229047	0.0794475	0.471285	0.895586	1.31858e-13
FBgn0037843	CG4511	109.09	117.29	123.42	82.42	87.32	89.78	106.35	109.44	109.56	224.19	243.11	216.57	296.62	287.05	299.8	331.2	309.56	322.73	116.6	7.18987	86.5067	3.7468	108.45	1.81964	227.957	13.6651	294.49	6.63651	321.163	10.9047	0.069746	0.542284	0.243826	0.00573595	0.140584	0.211952	1.11662	3.13495e-41	1.03711	3.11923e-36	-0.018924	0.687812	0.258233	6.55403e-07	1.32475	1.17614e-78	1.29182	2.94133e-84
FBgn0037844	CG4570	152.66	193.41	151.44	50.74	36.12	42.15	77.2	67.91	71.62	138.6	139.53	156.57	290.28	289.46	301.44	290.44	304.05	293.89	165.837	23.887	43.0033	7.34726	72.2433	4.67626	144.9	10.1172	293.727	6.69251	296.127	7.07531	-1.4487	3.3323e-17	-0.853271	1.56152e-10	0.564008	0.000196141	1.47009	3.57997e-28	-0.126731	0.345504	-0.135174	0.0034631	0.799773	1.11505e-29	2.21636	3.35309e-69	0.667593	6.23416e-09
FBgn0037845	CG14694	3.37	3.57	3.84	2.62	2.57	2.38	2.25	1.78	2.36	0.85	0.87	0.39	0.77	0.68	0.52	0.51	0.39	0.37	3.59333	0.235867	2.52333	0.126623	2.13	0.308058	0.703333	0.271539	0.656667	0.126623	0.423333	0.0757188	-0.0142616	0.962203	-0.404719	0.150561	-0.424061	0.192345	-2.06254	2.31521e-05	-2.21825	3.81072e-07	-0.77367	0.256982	-0.99306	0.254033	-3.13537	2.21143e-11	-3.25191	4.38971e-14
FBgn0037846	CG6574	7.72	9.54	10.94	20.73	21.82	19.89	13.33	13.44	11.87	9.12	10.34	8.82	7.45	9.41	8.37	6.78	4.88	5.65	9.4	1.61456	20.8133	0.967695	12.88	0.876413	9.42667	0.805067	8.41	0.980612	5.77	0.955667	1.64991	9.07004e-32	0.806169	1.85078e-07	-0.876953	5.8931e-17	-1.41429	6.27914e-27	0.0825173	0.667826	-0.678553	0.000155192	-0.938886	1.7067e-06	-2.40381	5.52868e-66	-0.863174	1.83994e-05
FBgn0267376	SelR	45.09	46.87	48.66	48.9	52.18	53.6	50.79	48.82	55.16	76.08	79.77	65.43	105.45	104.73	106.99	127.32	131.06	137.7	46.8733	1.785	51.56	2.41056	51.59	3.24483	73.76	7.44619	105.723	1.15453	132.027	5.25708	0.636865	3.40912e-08	0.485793	9.96982e-06	-0.184971	0.157297	0.239339	0.0473401	0.727009	2.99589e-10	0.175732	0.0030385	0.598605	1.64385e-11	0.788438	1.02203e-19	1.32298	1.07408e-60
FBgn0037848	Tsp86D	21.41	21.01	26.04	22.35	22.26	22.65	21.36	23.97	25.17	54.83	53.85	51.33	76.63	72.8	75.03	84.64	87.74	90.73	22.82	2.79576	22.42	0.204206	23.5	1.948	53.3367	1.80558	74.82	1.92362	87.7033	3.04517	0.474656	0.000431684	0.392821	0.00719296	-0.115349	0.493497	0.970415	8.56953e-24	1.29425	6.94681e-27	0.0835851	0.178888	0.480258	9.73817e-11	1.39982	7.30131e-66	1.7703	2.54365e-56
FBgn0011768	Fdh	330.53	314.51	321.71	398.2	418.23	331.81	350.45	347.1	273.61	220.16	243.59	234.71	345.09	342.95	355.27	445	461.23	447.24	322.25	8.02364	382.747	45.235	323.72	43.4288	232.82	11.8288	347.77	6.58273	451.157	8.79536	0.739682	4.84418e-10	0.349368	0.0101346	-0.422817	0.00216086	-0.995321	2.55617e-31	-0.404169	1.83116e-05	0.229303	2.11263e-08	0.719971	5.69393e-41	-0.326588	0.000126173	0.312461	0.000151109
FBgn0037849	CG4596	2.56	3.94	4.53	0.23	0.21	0.15	0.29	0.37	0.43	0.05	0.04	0	0.19	0.35	0.2	0	0.05	0.08	3.67667	1.01106	0.196667	0.0416333	0.363333	0.0702377	0.03	0.0264575	0.246667	0.0896289	0.0433333	0.0404145	-3.70894	3.24354e-24	-2.97565	7.01257e-20	0.695081	0.347415	-2.85605	0.0651566	-6.6813	9.61324e-10	-2.60279	0.02796	0.22316	0.939001	-2.71687	0.030223	-6.50544	8.92673e-16
FBgn0022359	Sodh-2	97.31	89.55	95.19	10.74	9.09	8.64	11.94	11.77	12.07	12.16	12.39	11.91	20.97	21.94	21.36	18.46	22.99	19.53	94.0167	4.01085	9.49	1.10567	11.9267	0.150444	12.1533	0.240069	21.4233	0.488092	20.3267	2.36775	-2.81741	6.57899e-93	-2.63445	9.38911e-116	0.150062	0.45835	0.0807598	0.703992	-2.88413	8.63073e-104	-0.234559	0.0644569	0.498888	0.00465822	0.528147	0.00197545	-2.39344	2.54088e-78
FBgn0037850	CG14695	3.41	3.42	4.29	0.09	0.2	0.23	0.14	0.05	0.3	0.11	0	0	0	0.04	0	0	0	0	3.70667	0.505206	0.173333	0.0737111	0.163333	0.126623	0.0366667	0.0635085	0.0133333	0.023094	0	0	-3.88047	9.99639e-15	-4.13905	3.92117e-14	-0.29392	0.887133	-2.36443	0.286928	-6.42143	4.92873e-07	0.0193049	NA	-1.73049	NA	-4.14346	0.0613362	-8.15716	1.00327e-10
FBgn0037852	Tpc1	116.48	90.57	128.65	17.86	14.81	15.75	19.21	20.03	18.99	28.33	29.74	27.66	40.13	39.96	44.2	55.73	53.07	55.13	111.9	19.4488	16.14	1.56195	19.41	0.548088	28.5767	1.06171	41.43	2.4004	54.6433	1.39518	-2.297	6.52249e-45	-2.18161	2.67667e-48	0.0834822	0.648292	0.545787	1.12183e-05	-1.90282	4.47914e-35	0.255349	9.59471e-05	0.6982	4.64793e-19	1.19356	5.85348e-30	-1.20782	6.78379e-16
FBgn0037853	CG14696	58.8	36.09	59.02	16.71	8.26	14.32	9.2	7.03	8.89	0.56	1.08	0.74	1.23	1.5	1.16	0	0.08	0.08	51.3033	13.1756	13.0967	4.3558	8.37333	1.17364	0.793333	0.264071	1.29667	0.179536	0.0533333	0.046188	-1.47227	3.30025e-07	-2.27537	3.03327e-25	-0.834111	0.00407511	-4.30548	2.74026e-28	-5.92404	3.7212e-65	-4.84324	9.79746e-07	-4.22905	0.000406822	-8.60943	1.09798e-21	-10.1838	5.60809e-31
FBgn0037856	Leash	10.23	19.13	20.37	16.71	18.43	19.37	20.84	18.56	22.59	16.22	17.28	18.34	15.99	17.43	17.74	19.46	17.86	18.4	16.5767	5.53123	18.17	1.34893	20.6633	2.0208	17.28	1.06	17.0533	0.933827	18.5733	0.813962	0.648486	0.00458461	0.679733	0.00281792	-0.00170789	0.995247	-0.358769	0.00300513	0.141048	0.554602	-0.0206272	0.836524	-0.125047	0.253854	-0.536275	4.80503e-07	0.00492181	0.983482
FBgn0042094	Adk3	31.02	32.16	33.01	57.73	62.55	55.2	72.36	70.59	61.05	42.75	47.12	53.28	27.59	30.59	29.82	7.74	6.99	7.94	32.0633	0.998516	58.4933	3.73398	68	6.08359	47.7167	5.2903	29.3333	1.55809	7.55667	0.500833	1.36373	1.20345e-37	1.42999	2.81558e-36	0.0332805	0.86092	-0.580311	1.60713e-07	0.635314	2.81417e-07	-2.09134	5.44147e-57	-2.88069	4.67253e-81	-3.50739	2.64748e-174	-2.2463	1.67871e-60
FBgn0037855	CG6621	26.15	32.69	28.91	26.69	26	21.99	30.25	32.02	26.62	39.12	36.11	38.91	44.89	42.81	44.5	51.41	50.85	51.07	29.25	3.28323	24.8933	2.53792	29.63	2.75287	38.0467	1.68049	44.0667	1.10564	51.11	0.282135	0.264909	0.0467685	0.367088	0.00529621	0.0698449	0.704598	0.333163	0.00114358	0.449997	5.89598e-05	0.0680972	0.221126	0.192909	0.0109872	0.473243	7.35931e-08	0.637338	1.18853e-11
FBgn0037857	Tengl4	0.05	0.07	0.03	0	0	0	0.02	0	0	0	0	0	0	0	0	0	0	0	0.05	0.02	0	0	0.00666667	0.011547	0	0	0	0	0	0	-3.35914	0.347933	-2.45984	0.392576	0.861696	NA	NA	NA	-1.50941	NA	NA	NA	NA	NA	NA	NA	-2.28608	0.463758
FBgn0083950	side-VI	0.2	0.28	0.31	0.01	0.01	0	0.08	0.04	0.05	0	0	0	0.01	0	0	0	0	0	0.263333	0.0568624	0.00666667	0.0057735	0.0566667	0.0208167	0	0	0.00333333	0.0057735	0	0	-5.08824	2.70971e-06	-1.90639	0.000506402	3.10987	0.0573874	-0.9029	NA	-5.96773	1.43095e-05	0.0885736	NA	NA	NA	-1.75719	NA	-6.77192	4.76115e-07
FBgn0263403	CG43449	0	0	0	0	0	0	0	0.09	0.06	0	0	0	0	0	0	0	0	0	0	0	0	0	0.05	0.0458258	0	0	0	0	0	0	NA	NA	2.57189	NA	2.63783	NA	NA	NA	NA	NA	NA	NA	NA	NA	NA	NA	NA	NA
FBgn0037860	CG6629	0.2	0.05	0.3	0	0	0	0.22	0.12	0.18	0	0	0	0	0	0	0	0	0	0.183333	0.125831	0	0	0.173333	0.0503322	0	0	0	0	0	0	-4.68399	0.0682984	0.261927	0.850343	4.92985	0.0436032	NA	NA	-2.84617	NA	NA	NA	NA	NA	NA	NA	-3.61724	0.127206
FBgn0040256	Ugt86Dd	1.22	1	2.07	0.37	0.41	0.38	1.76	1.25	2.05	0	0.06	0.21	0.46	0.25	0.22	0	0.16	0	1.43	0.565066	0.386667	0.0208167	1.68667	0.40501	0.09	0.108167	0.31	0.130767	0.0533333	0.092376	-1.38007	0.00563853	0.585546	0.171555	1.93274	2.21037e-06	-2.59887	0.0442768	-4.17586	5.2368e-05	-3.19986	0.0305982	-1.0825	0.712659	-3.94129	0.00464401	-5.53845	2.46913e-06
FBgn0037862	CG4706	0.31	0.2	0.21	0	0	0	1.04	0.78	0.65	0	0	0	0	0	0	0	0	0	0.24	0.0608276	0	0	0.823333	0.198578	0	0	0	0	0	0	-6.54586	6.9001e-05	2.11077	8.4939e-06	8.62461	2.32693e-10	NA	NA	-4.70007	0.00371541	NA	NA	NA	NA	NA	NA	-5.49194	0.000402741
FBgn0261291	CheA86a	0.24	0.59	0.49	0	0	0	0.35	0.28	0.28	0	0	0	0	0	0	0	0	0	0.44	0.180278	0	0	0.303333	0.0404145	0	0	0	0	0	0	-5.67041	0.0036352	-0.17547	0.863956	5.46145	0.00877519	NA	NA	-3.82666	0.0449469	NA	NA	NA	NA	NA	NA	-4.58713	0.0116181
FBgn0040251	Ugt86Di	7.05	3.44	7.5	1.54	2.29	2.04	2.08	2.11	1.85	0.69	0.47	0.42	0.17	0.35	0.33	0.05	0	0.02	5.99667	2.22554	1.95667	0.381881	2.01333	0.142244	0.526667	0.143643	0.283333	0.0986577	0.0233333	0.0251661	-1.12096	0.00155474	-1.23457	0.000213404	-0.151181	0.732336	-2.16777	1.14908e-05	-3.4401	6.17673e-13	-3.64567	0.00946638	-4.6245	0.000777316	-6.85088	3.68716e-10	-8.0768	1.43229e-13
FBgn0040257	Ugt86Dc	0.21	0.24	0.2	0.31	0.36	0.17	0.84	0.59	0.56	0.22	0.06	0	0.08	0.21	0.33	0	0.08	0.08	0.216667	0.0208167	0.28	0.0984886	0.663333	0.153731	0.0933333	0.113725	0.206667	0.125033	0.0533333	0.046188	0.864971	0.306904	1.9456	0.00130567	1.044	0.124408	-1.78693	0.202216	-1.07124	0.429737	-2.12604	0.164973	-1.10646	0.652566	-3.01198	0.0254848	-2.24886	0.0986389
FBgn0040259	Ugt86Da	31.31	17.01	32.56	34.16	30.89	33.04	30.96	30.21	34.08	32.52	29.53	27.32	37.91	39.11	40.18	43.13	39.58	42.49	26.96	8.63959	32.6967	1.66182	31.75	2.05239	29.79	2.60973	39.0667	1.13562	41.7333	1.8921	0.771423	0.00160138	0.577705	0.0194719	-0.226768	0.0609016	-0.411397	0.000565126	0.206391	0.430681	-0.0465894	0.543138	0.248402	0.0153559	-0.213752	0.0291551	0.451842	0.0748415
FBgn0027584	CG4757	0.13	0.11	0.1	0.05	0.13	0.51	0.04	0.11	0.18	0.07	0.29	0	0	0.02	0	0.04	0	0	0.113333	0.0152753	0.23	0.245764	0.11	0.07	0.12	0.151327	0.00666667	0.011547	0.0133333	0.023094	1.55821	0.182827	0.300536	0.810271	-1.29938	0.405138	-1.21302	0.454428	0.206053	0.890668	0.979241	NA	-3.0768	0.258698	-4.3907	0.0177561	-2.94049	0.1127
FBgn0040253	Ugt86Dg	0.05	0	0	0.04	0	0	0.04	0	0	0	0	0	0	0	0	0	0	0	0.0166667	0.0288675	0.0133333	0.023094	0.0133333	0.023094	0	0	0	0	0	0	0.0846063	NA	-0.0926368	NA	-0.195693	NA	-0.0879032	NA	-0.143416	NA	NA	NA	NA	NA	-0.926241	NA	-0.914222	NA
FBgn0040255	Ugt86De	0	0	0.06	0	0	0	0.05	0	0.01	0	0	0	0	0	0	0	0	0	0.02	0.034641	0	0	0.02	0.0264575	0	0	0	0	0	0	-2.37143	NA	0.45466	0.90071	2.8208	NA	NA	NA	-0.546186	NA	NA	NA	NA	NA	NA	NA	-1.34801	NA
FBgn0026314	Ugt35b	0.05	0	0	3.07	0.21	0.38	2.81	0.36	1.86	0	0	0	0.05	0.02	0.04	0	0	0	0.0166667	0.0288675	1.22	1.6044	1.67667	1.23525	0	0	0.0366667	0.0152753	0	0	6.7407	4.71476e-06	7.05089	5.68657e-08	0.282007	0.911787	-6.73835	3.49523e-05	-0.144711	NA	-2.19779	NA	NA	NA	-7.57692	2.94782e-06	-0.916899	NA
FBgn0026315	Ugt35a	9.14	7.28	9.85	7.91	4.16	5.86	6.6	5	6.63	5.01	3.65	2.05	15.62	14.98	15.37	6.77	6.59	6.7	8.75667	1.32719	5.97667	1.87772	6.07667	0.932541	3.57	1.48162	15.3233	0.322542	6.68667	0.0907377	-0.0557501	0.863973	-0.184463	0.418706	-0.159049	0.709059	-1.00337	0.00649928	-1.20356	0.000130627	-1.34169	1.78999e-28	0.646109	0.0489382	-0.405565	0.154024	-0.565081	0.00398179
FBgn0040250	Ugt86Dj	0.02	0.05	0	0.02	0.05	0.06	0.14	0.08	0.29	0.2	0.06	0	0	0	0.02	0	0	0	0.0233333	0.0251661	0.0433333	0.0208167	0.17	0.108167	0.0866667	0.102632	0.00666667	0.011547	0	0	1.27985	0.57212	3.14451	0.0395658	1.77958	0.232706	0.774559	0.724143	1.90766	NA	0.00557514	NA	-3.49221	0.320842	-2.79633	0.375325	-1.64558	NA
FBgn0040252	Ugt86Dh	0.02	0.09	0	0.23	0.11	0.09	0.29	0.15	0.17	0	0	0.1	0	0.02	0	0	0	0	0.0366667	0.0472582	0.143333	0.0757188	0.203333	0.0757188	0.0333333	0.057735	0.00666667	0.011547	0	0	2.42138	0.112509	2.81088	0.0335678	0.360847	0.797551	-2.82968	0.158949	-0.57358	NA	0.0364299	NA	-1.7816	NA	-4.66555	0.0180969	-2.36183	0.553649
FBgn0037870	CG18577	0	0	0.09	0	0.12	0	3.17	2.45	2.97	0	0	0	0	0	0	0	0	0	0.03	0.0519615	0.04	0.069282	2.86333	0.371663	0	0	0	0	0	0	0.846875	0.861448	6.76293	4.60382e-09	5.85921	2.32765e-10	-0.62522	NA	0.0567811	NA	NA	NA	NA	NA	-1.42837	NA	-0.714793	NA
FBgn0261808	cu	1.87	1.48	1.85	14.27	14.51	15.29	15.02	12.9	18.79	44.34	33.74	46.52	44.3	45.49	48.01	48.41	45.78	49.89	1.73333	0.219621	14.69	0.533292	15.57	2.98327	41.5333	6.83668	45.9333	1.89432	48.0267	2.08164	3.57334	1.73161e-79	3.50674	5.68336e-57	-0.101997	0.703015	1.2147	2.5904e-16	4.63998	1.0014e-118	-0.0774713	0.306456	-0.0216805	0.892816	1.14257	1.06194e-31	4.60946	3.23435e-212
FBgn0037873	SdhC	224.14	191.95	194.4	198.47	199.62	213.79	208.84	213.93	225.95	96.16	102.29	101.58	133.72	146.25	141.84	148.47	186.49	161.28	203.497	17.9196	203.96	8.53243	216.24	8.78579	100.01	3.35304	140.603	6.35588	165.413	19.3441	0.496113	0.000660722	0.428716	0.00182734	-0.10131	0.449741	-1.31144	7.27122e-42	-0.963394	6.17673e-13	0.0833577	0.452376	0.488831	3.19682e-05	-0.874006	6.4551e-15	-0.476279	0.00122188
FBgn0037874	Tctp	1336.11	1315.97	1401.56	2086.26	2139.86	2337.54	1947.6	2009.02	2184.41	2244.58	2332.19	2306.08	3033.82	2879.56	2915.6	2671.88	2648.3	2745.19	1351.21	44.7492	2187.89	132.345	2047.01	122.891	2294.28	44.9805	2942.99	80.6959	2688.46	50.5273	1.19419	6.34079e-28	0.945711	3.19466e-22	-0.282317	0.0118383	-0.214483	0.00885784	0.830636	7.44362e-30	-0.275474	5.90728e-15	-0.00570997	0.882182	-0.271216	0.000399556	0.82079	9.34333e-37
FBgn0037875	ZnT86D	39.46	51.11	53.41	41.34	40.95	42.3	39.32	44.99	40.95	70.71	71.26	69.24	80.21	77.25	76.36	88.37	82.33	86.54	47.9933	7.47903	41.53	0.694766	41.7533	2.91912	70.4033	1.04433	77.94	2.01561	85.7467	3.09717	0.296694	0.0243998	0.152869	0.288994	-0.176578	0.161449	0.480626	9.10561e-09	0.627138	8.25011e-08	-0.005702	0.936296	0.0502116	0.468927	0.479165	1.31622e-10	0.671335	7.4351e-09
FBgn0086472	RpS25	8392.59	5485.23	6006.66	6280.61	6083.31	6269.08	6007.33	6056.32	6164.55	3546.79	3360.95	3419.27	3199.74	3334.93	3082.42	2497.36	3193.75	2729.23	6628.16	1550.12	6211	110.733	6076.07	80.4486	3442.34	95.043	3205.7	126.36	2806.78	354.613	0.391138	0.0534717	0.208621	0.31328	-0.216628	0.00494106	-1.13253	1.07587e-64	-0.8891	1.82571e-06	-0.336538	0.000216371	-0.527981	6.13974e-09	-1.71226	1.51215e-64	-1.41931	7.89201e-13
FBgn0037876	CG4820	39.89	26.84	28.16	14.03	14.99	12.38	15.45	15.25	15.46	13.41	17.89	17.66	20.55	19.68	17.92	16.2	19.35	18.62	31.63	7.18375	13.8	1.32011	15.3867	0.118462	16.32	2.52276	19.3833	1.33986	18.0567	1.64883	-0.71549	0.00139471	-0.706028	0.00100463	-0.0253966	0.914106	-0.041511	0.844104	-0.903483	0.00013333	-0.254354	0.071395	-0.0875572	0.675706	-0.181933	0.266103	-0.992378	6.91092e-06
FBgn0037877	CG6689	33.91	30.54	30.74	20.73	17.1	15.87	18.17	17.68	17.17	25.95	25.91	25.05	25.32	26.52	26.89	34.37	33.96	34.6	31.73	1.89058	17.9	2.52684	17.6733	0.500033	25.6367	0.508462	26.2433	0.820752	34.31	0.324191	-0.335496	0.0436054	-0.502783	0.000123247	-0.199412	0.216954	0.241368	0.0946691	-0.2428	0.0717166	0.241348	0.00140778	0.184025	0.0642678	0.37407	0.00348951	-0.0618223	0.60273
FBgn0037878	CG6693	230.36	242.59	229.18	44.67	47.57	43.18	54.82	48.56	50.89	103.76	104.69	98.99	112.48	107.71	112.33	155.47	150.91	165.44	234.043	7.42511	45.14	2.23242	51.4233	3.1639	102.48	3.05799	110.84	2.7117	157.273	7.43096	-1.87897	1.58359e-78	-1.84217	3.59902e-79	0.00326355	0.985341	0.904462	9.89202e-28	-1.1229	4.88846e-37	0.362174	5.81907e-12	0.382838	4.28051e-09	1.23568	2.96599e-67	-0.743961	3.98676e-23
FBgn0020910	RpL3	3086.97	2785.77	2786.46	5725.65	5215.91	5151.67	4863.71	4990.73	4901.39	2084.59	2018.28	2068.77	1901.65	2192.56	1971.14	2098.43	2271.55	2039.53	2886.4	173.699	5364.41	314.488	4918.61	65.2374	2057.21	34.6327	2021.78	151.923	2136.5	120.605	1.3866	1.9926e-30	1.11098	2.68367e-23	-0.308767	5.79118e-05	-1.66311	9.72022e-137	-0.424705	7.52683e-05	-0.0654309	0.427827	-0.179541	0.00398756	-1.89421	3.97185e-133	-0.607614	1.44409e-08
FBgn0037879	scpr-C	1.75	1.94	2.89	13.5	18.42	13.47	7.73	7.22	7.57	12.58	13.36	9.34	15.24	12.67	15.85	11.57	11.75	11.96	2.19333	0.610765	15.13	2.84926	7.50667	0.260832	11.76	2.13176	14.5867	1.68767	11.76	0.195192	3.2858	1.80286e-37	2.12553	1.63724e-15	-1.19544	2.03987e-10	-0.628803	0.00722282	2.50359	1.1719e-17	-0.456466	0.00806287	-0.248327	0.320644	-0.928713	2.95601e-06	2.2519	1.88833e-17
FBgn0037880	CG17726	27.79	26.57	24.15	20.01	19.56	16.61	17.47	18.46	16.29	20.55	24.17	21.33	19.32	19.18	19.71	28.34	31.69	28.63	26.17	1.85267	18.7267	1.84684	17.4067	1.08639	22.0167	1.90519	19.4033	0.274651	29.5533	1.85608	0.0069254	0.970672	-0.246599	0.119049	-0.286749	0.0443472	-0.0418108	0.800416	-0.18341	0.247087	0.453599	4.07009e-06	0.182449	0.205039	0.0891328	0.510496	-0.00270668	0.9845
FBgn0037881	GCC88	53.36	45.65	50.46	30.33	31.41	26.67	33.61	34.25	27.93	37.88	38.44	43.34	51.82	48.56	49.19	66.79	65.24	68.13	49.8233	3.89423	29.47	2.48427	31.93	3.47885	39.8867	3.00375	49.8567	1.72923	66.72	1.44627	-0.266488	0.0576687	-0.300238	0.0428558	-0.0667981	0.72652	0.153782	0.155066	-0.259893	0.0525653	0.276156	7.67432e-07	0.514098	9.413e-11	0.614229	5.75801e-15	0.246745	0.0297887
FBgn0037882	CG17187	22.48	25.7	23.06	13.56	15.71	13.31	16.01	15.97	15.31	20.95	24.99	22.13	19.78	18.22	19.51	27.18	33.69	27.05	23.7467	1.71631	14.1933	1.31941	15.7633	0.393107	22.69	2.0774	19.17	0.833727	29.3067	3.79663	-0.245074	0.112743	-0.243858	0.075514	-0.0332354	0.885296	0.399196	0.00960168	0.00625681	0.967243	0.455738	0.000303801	0.126108	0.476137	0.473243	0.00184738	0.126295	0.410287
FBgn0037883	CG14701	30.14	41.59	36.79	43.73	51.13	41.37	39.89	34.28	35.88	27.96	28.94	26.91	25.69	22.21	25.77	21.92	13.44	20.35	36.1733	5.74986	45.41	5.09227	36.6833	2.88999	27.9367	1.0152	24.5567	2.03267	18.57	4.51153	0.830876	1.13709e-06	0.371929	0.0315236	-0.492915	0.000909095	-0.974298	2.9193e-08	-0.292555	0.13789	-0.516813	0.0156919	-0.804361	0.00134148	-1.82475	4.48952e-20	-1.10154	1.25182e-06
FBgn0037884	Arfip	18.12	21.46	23.06	20.48	22.08	22.75	22.37	22.58	23.48	47.01	48.8	52.14	36.28	35.11	35.07	42.41	46.78	47.54	20.88	2.52056	21.77	1.16632	22.81	0.589661	49.3167	2.60373	35.4867	0.687338	45.5767	2.76862	0.563717	1.57509e-05	0.47851	4.49111e-05	-0.118711	0.416693	0.894476	1.933e-18	1.30872	1.41631e-32	0.214372	0.00498761	-0.346177	0.000175087	0.49695	1.2108e-06	0.95712	4.47129e-17
FBgn0037885	CG17721	37.17	34.11	32.95	26.42	32.23	23.44	27.81	29.51	30.14	38.91	41.97	43.64	61.34	58.98	56.58	76.22	80.11	70.42	34.7433	2.18012	27.3633	4.47028	29.1533	1.20525	41.5067	2.3988	58.9667	2.38003	75.5833	4.87627	0.145052	0.470934	0.0902685	0.608768	-0.0901004	0.720952	0.319964	0.0714242	0.31718	0.0507961	0.204736	0.051452	0.629698	2.54726e-06	0.898264	1.44827e-09	0.943314	5.91942e-12
FBgn0051441	CG31441	19.21	19.24	20.7	8.98	8.39	7.2	8.41	7.91	8.23	14.27	14.66	12.06	26.98	22.94	25.78	30.43	28.01	30.88	19.7167	0.851724	8.19	0.906697	8.18333	0.253246	13.6633	1.40215	25.2333	2.07474	29.7733	1.54358	-0.773846	1.17623e-06	-0.922857	2.58428e-11	-0.181943	0.400988	0.46941	0.0177578	-0.450832	0.00510777	0.0984211	0.403642	0.880194	2.03198e-09	1.30128	1.28103e-20	0.426101	0.000211242
FBgn0051388	CG31388	38.11	34	36.44	7.05	6.61	6.41	6.72	6.85	6.96	8.46	6.33	7.16	14.63	15.03	15.22	12.44	11.3	12.67	36.1833	2.06699	6.69	0.327414	6.84333	0.120139	7.31667	1.07361	14.96	0.301164	12.1367	0.733644	-1.94283	1.62228e-41	-2.05964	7.47663e-52	-0.150225	0.465067	-0.150838	0.528886	-2.24258	1.63804e-37	-0.439341	0.000213241	0.499356	0.0163707	0.297929	0.0634493	-1.74484	2.33082e-40
FBgn0037888	scpr-B	4.01	2.29	2.38	0.17	0.04	0	0.11	0	0.09	0	0.17	0	0	0.07	0.13	0.14	0	0	2.89333	0.968108	0.07	0.0888819	0.0666667	0.0585947	0.0566667	0.0981495	0.0666667	0.0650641	0.0466667	0.080829	-4.85315	9.94481e-09	-5.18173	2.86966e-10	-0.421403	0.918008	-0.823814	NA	-5.74716	1.97702e-05	-0.0212996	0.995335	0.0702443	0.989386	-0.802339	0.796102	-5.67456	1.05347e-06
FBgn0037889	scpr-A	6.94	2.9	3.68	3.62	3.66	3	1.77	1.29	1.23	1.26	1.67	0.24	3.58	2.84	3.23	2.4	0.86	2.26	4.50667	2.14311	3.42667	0.370045	1.43	0.295973	1.05667	0.736365	3.21667	0.37018	1.84	0.851587	0.0677649	0.89223	-1.336	0.00485653	-1.44028	2.28255e-05	-1.91234	0.000837546	-2.00811	0.00212185	-0.897958	0.0399666	0.551441	0.540334	-1.41538	0.00151606	-1.46058	0.00879789
FBgn0037890	CG17734	388.13	305.7	326.9	136.94	186.33	168.55	158.06	158.77	151.82	282.92	258.38	268.34	440.49	435.59	427.83	380.95	387.17	381.73	340.243	42.8043	163.94	25.0156	156.217	3.82414	269.88	12.3423	434.637	6.38361	383.283	3.38847	-0.563809	0.00152548	-0.783971	6.51262e-08	-0.255083	0.105896	0.438871	0.000381692	-0.272825	0.0691252	-0.328305	4.29264e-13	0.270703	5.15104e-05	0.658825	5.10432e-09	-0.00502449	0.971643
FBgn0037891	CG5214	101.76	119.17	116.22	212.05	208.81	193.34	191.38	197.99	172.68	175.27	172.34	181.06	146.36	152.25	150.47	157.34	156.72	156.3	112.383	9.31757	204.733	9.99902	187.35	13.1274	176.223	4.43748	149.693	3.02083	156.787	0.523195	1.36443	9.54594e-52	1.08585	7.2868e-28	-0.311064	0.000719922	-0.49696	3.71632e-14	0.718878	6.4328e-19	-0.0792353	0.10713	-0.402578	5.51576e-14	-0.951352	3.13028e-60	0.311364	2.07441e-05
FBgn0004595	pros	0.43	0.47	0.94	0.01	0	0	0.01	0.01	0.01	0.02	0.01	0.06	0	0.01	0	0	0	0	0.613333	0.283608	0.00333333	0.0057735	0.01	0	0.03	0.0264575	0.00333333	0.0057735	0	0	-7.85694	1.4992e-16	-5.50662	4.92484e-18	1.5125	0.61543	2.9873	0.158627	-4.52081	3.25809e-07	-1.33309	NA	-5.06412	0.032559	-2.43929	0.580221	-9.37712	2.79325e-13
FBgn0026063	KP78b	0.11	0.08	0.53	0.92	0.45	0.6	0.9	0.93	1	0.13	0.14	0.08	0.22	0.05	0.06	0	0	0	0.24	0.251595	0.656667	0.240069	0.943333	0.051316	0.116667	0.0321455	0.11	0.0953939	0	0	1.98763	0.00618334	2.34849	0.000249842	0.34845	0.46549	-2.83906	1.78503e-05	-1.01755	0.340877	-4.79665	0.00840619	-4.89761	0.0126263	-7.81634	3.3076e-09	-5.93163	0.000715496
FBgn0026064	KP78a	0.04	0.02	0.2	0.51	0.36	0.48	0.68	0.55	0.61	0.13	0.05	0.08	0.03	0.05	0.05	0	0	0	0.0866667	0.0986577	0.45	0.0793725	0.613333	0.0650641	0.0866667	0.0404145	0.0433333	0.011547	0	0	2.91786	6.59726e-05	3.19988	1.98698e-06	0.260778	0.550815	-2.6519	8.45567e-05	0.12106	0.924966	-3.89824	0.0579307	-5.07326	0.0100604	-7.78106	2.53538e-09	-4.96129	0.0134664
FBgn0037892	mRpL40	88.99	81.07	68.7	71.91	75.68	62.02	58.44	56.29	49.96	39.14	43.2	43.06	61.18	64.53	61.59	57.78	59.45	63.07	79.5867	10.226	69.87	7.05479	54.8967	4.40836	41.8	2.30469	62.4333	1.8273	60.1	2.70424	0.298965	0.0939175	-0.197976	0.274278	-0.530683	9.99026e-06	-1.02138	3.53137e-16	-0.869039	3.1952e-07	-0.199113	0.0370671	0.292091	0.0264272	-0.781433	1.36223e-12	-0.580566	0.000189474
FBgn0264694	mgr	185.95	164.62	173.01	170.53	190.9	158.88	157.2	153.33	134.6	202.47	205.24	192.13	259.1	232.7	248.7	270.19	298.16	280.68	174.527	10.7456	173.437	16.2067	148.377	12.0868	199.947	6.90966	246.833	13.2986	283.01	14.1298	0.481809	0.000192129	0.107265	0.441331	-0.407978	0.000172978	-0.0721486	0.446713	0.260757	0.0256318	0.0502992	0.491679	0.26347	0.000217424	0.140758	0.113727	0.52268	1.85494e-06
FBgn0011774	Irbp	57.58	61.45	59.07	17.2	16.36	15.41	17.44	15.96	17.31	65.64	68.76	66.53	58.79	57.2	65.03	73.57	71.97	75.53	59.3667	1.95198	16.3233	0.895563	16.9033	0.819532	66.9767	1.60724	60.34	4.13873	73.69	1.78303	-1.36667	5.189e-38	-1.46665	3.91793e-49	-0.133047	0.301424	1.75766	1.41804e-96	0.242157	0.00486479	0.144279	0.0272087	-0.0964782	0.143967	1.60953	1.26743e-95	0.141562	0.0509149
FBgn0037894	Ranbp9	99.04	102.03	92.15	124.28	129.77	114.95	116.72	112.74	98.33	119.29	117.77	108.42	123.74	124.01	131.37	145.51	137.11	150.01	97.74	5.06667	123	7.49246	109.263	9.6754	115.16	5.88628	126.373	4.32935	144.21	6.54752	0.824615	8.6268e-14	0.5034	2.61557e-05	-0.354066	0.0003647	-0.37284	3.03198e-07	0.303282	0.00394499	0.0469413	0.346309	0.0886265	0.128433	-0.33549	2.79365e-08	0.38887	8.04792e-06
FBgn0037895	CG6723	3.33	3.02	2.59	0	0.02	0	0.02	0.03	0.05	0	0	0	0	0.02	0.04	0	0	0	2.98	0.371618	0.00666667	0.011547	0.0333333	0.0152753	0	0	0.02	0.02	0	0	-7.97224	8.61904e-13	-6.21363	1.22573e-21	1.81803	NA	0.345083	NA	-7.95544	2.62995e-10	-1.44324	NA	NA	NA	-0.492491	NA	-8.74332	2.46584e-12
FBgn0267236	CG45676	1.42	1.28	1.06	0	0	0	0	0.08	0	0	0	0	0	0	0	0	0	0	1.25333	0.181475	0	0	0.0266667	0.046188	0	0	0	0	0	0	-6.04386	0.000642787	-5.14808	0.00182524	0.861696	NA	NA	NA	-4.19766	0.0155218	NA	NA	NA	NA	NA	NA	-4.88348	0.00324889
FBgn0037896	ninaG	3.95	2.74	3.68	0.03	0.04	0.05	0.11	0.04	0.09	0	0	0.09	0	0	0.02	0.04	0	0.03	3.45667	0.635164	0.04	0.01	0.08	0.0360555	0.03	0.0519615	0.00666667	0.011547	0.0233333	0.0208167	-5.92348	6.84107e-23	-5.08449	1.09942e-25	0.807747	0.683689	-1.07066	NA	-7.14366	1.49716e-08	1.72381	NA	-0.0283215	0.994145	-1.12582	0.608665	-7.09579	4.30579e-11
FBgn0037897	CG5270	10.15	10.68	11.58	14.08	12.64	12.27	13.29	13.49	13.64	31.74	32.19	30.01	15.11	16.46	16.74	22.02	20.1	20.16	10.8033	0.722934	12.9967	0.95626	13.4733	0.175594	31.3133	1.15093	16.1033	0.871569	20.76	1.0916	0.765135	1.03295e-12	0.666812	1.80759e-13	-0.130812	0.236095	0.989912	3.82016e-32	1.60526	9.93587e-80	0.221364	0.00158323	-0.829657	8.09424e-41	0.109203	0.248052	0.771647	3.32991e-19
FBgn0037898	Dtd	20.3	16.96	16.06	20.47	24.65	21.37	19.39	17.27	16.76	14.87	13.63	8.88	12.8	13.6	15.17	14.87	15.6	14.75	17.7733	2.23395	22.1633	2.20003	17.8067	1.39472	12.46	3.16176	13.8567	1.20567	15.0733	0.460036	0.807638	0.000230697	0.339945	0.135	-0.503094	0.00616379	-1.08533	2.93446e-05	-0.429539	0.149973	-0.0318328	0.901346	0.0148726	0.968465	-1.13023	1.89634e-08	-0.420431	0.0756883
FBgn0037899	RpL24-like	775.83	528.94	649.95	541.57	496.87	433.3	470.2	444.02	395.72	296.7	309.48	303.06	346.05	355.99	332.29	366.33	412.62	385.54	651.573	123.453	490.58	54.4084	436.647	37.7835	303.08	6.39002	344.777	11.9012	388.163	23.2562	0.0767787	0.708221	-0.240538	0.20211	-0.350103	0.00240743	-0.973449	1.43895e-29	-1.04546	3.78417e-10	0.02347	0.770726	0.120898	0.111425	-0.903392	1.71316e-21	-0.925504	5.4857e-08
FBgn0037900	CG5276	14.25	12.6	14.92	15.96	15.44	15.63	15.19	16.66	15.77	26.97	27.86	25.08	28.01	30.71	28.53	35.99	38.1	36.74	13.9233	1.194	15.6767	0.263122	15.8733	0.740428	26.6367	1.41966	29.0833	1.43253	36.9433	1.06959	0.666338	5.89203e-06	0.534041	0.000248083	-0.165361	0.25578	0.488085	6.50922e-05	1.00361	9.75214e-13	0.196336	0.0295374	0.230015	0.0365665	0.667636	4.34943e-11	1.23154	1.55125e-23
FBgn0037901	Exd2	65.68	55.42	57.09	39.72	34.95	36.82	40.14	40.8	37.35	42.3	45.61	47.23	53.22	50.61	51.99	60.93	58.08	58.65	59.3967	5.50522	37.1633	2.40346	39.43	1.83131	45.0467	2.51281	51.94	1.30572	59.22	1.50808	-0.184908	0.250369	-0.250921	0.084601	-0.0986341	0.496495	-0.0058361	0.963207	-0.338721	0.0150469	0.0441836	0.518093	0.163624	0.0536448	0.105172	0.291087	-0.180162	0.161986
FBgn0037902	CG5281	41.9	45.15	44.58	7.29	7.74	6.05	15.92	15.07	14.45	1.85	2.15	3.03	3.7	2.87	3.35	1.67	1.39	1.32	43.8767	1.73541	7.02667	0.875233	15.1467	0.737993	2.34333	0.613297	3.30667	0.416693	1.46	0.185203	-2.1483	3.54723e-60	-1.18852	2.14777e-30	0.926527	1.12621e-11	-1.8953	4.16012e-12	-4.20736	6.65925e-102	-1.32139	6.2103e-06	-0.895546	0.0391145	-2.82956	5.12684e-28	-5.08114	1.26587e-160
FBgn0051374	sals	0.22	0.22	0.44	6.63	6.52	4.44	9.17	8.48	8.48	0.68	1.04	0.89	0.65	0.67	0.77	0	0.13	0.06	0.293333	0.127017	5.86333	1.23387	8.71	0.398372	0.87	0.180831	0.696667	0.064291	0.0633333	0.0650641	4.80024	1.78944e-52	5.21742	3.11247e-90	0.393182	0.0392111	-3.02674	2.12993e-27	1.62999	0.00157591	-4.08259	4.06393e-06	-4.46465	2.73514e-06	-7.61438	3.43686e-23	-2.75973	0.0168371
FBgn0046225	CG17230	31.31	26.39	32.45	12.19	8.59	9.65	9.98	10.55	10.33	18.26	17.56	16.93	29.23	25.5	26.63	39.18	42.6	40.53	30.05	3.2205	10.1433	1.85001	10.2867	0.28746	17.5833	0.665307	27.12	1.91267	40.77	1.72259	-1.07202	3.83735e-09	-1.20235	2.18791e-18	-0.161768	0.49204	0.515369	0.00280545	-0.706572	9.02389e-07	0.439824	1.134e-07	0.974025	4.99548e-22	1.44044	3.96352e-22	0.26487	0.0463109
FBgn0037906	PGRP-LB	0.46	0.05	0.51	1.08	1.22	0.8	4.24	3.51	3.2	2.71	2.92	2.94	2.17	2.34	2.08	0	0	0	0.34	0.252389	1.03333	0.213854	3.65	0.533948	2.85667	0.12741	2.19667	0.132035	0	0	2.08729	0.00854257	3.74382	2.03918e-12	1.63365	5.43423e-07	1.1841	0.00626097	3.11341	1.21012e-06	-7.33698	1.9328e-08	-7.80302	3.44388e-09	-6.67082	1.96239e-06	-4.68021	0.023779
FBgn0037908	dpr5	0	0	0.03	0	0	0	0	0	0	0	0	0	0	0	0	0	0	0	0.01	0.0173205	0	0	0	0	0	0	0	0	0	0	-1.16037	NA	-1.22739	NA	NA	NA	NA	NA	0.683999	NA	NA	NA	NA	NA	NA	NA	-0.100804	NA
FBgn0053512	dpr4	0.04	0.02	0.06	0	0	0	0	0	0	0	0	0	0	0	0	0	0	0	0.04	0.02	0	0	0	0	0	0	0	0	0	0	-4.08673	0.166803	-4.15476	0.137869	NA	NA	NA	NA	-2.24833	NA	NA	NA	NA	NA	NA	NA	-3.04851	0.249126
FBgn0037910	CG14708	0.05	0.14	0	0	0.03	0	0	0	0	0	0	0	0	0	0	0	0	0	0.0633333	0.070946	0.01	0.0173205	0	0	0	0	0	0	0	0	-1.72078	NA	-2.75313	NA	-1.06186	NA	1.03155	NA	-0.831581	NA	NA	NA	NA	NA	0.234567	NA	-1.57608	NA
FBgn0037911	CG10898	26.27	25.8	27.2	10.61	10.57	9.67	14.78	14.08	13.79	23.22	22.75	23.11	20.69	21.71	20.7	29.91	27.12	32.46	26.4233	0.712484	10.2833	0.531539	14.2167	0.508953	23.0267	0.245832	21.0333	0.586032	29.83	2.6709	-0.866688	7.33711e-13	-0.549644	6.5948e-07	0.283846	0.01673	0.883543	4.32904e-14	-0.132277	0.258495	0.36584	5.96213e-05	0.144402	0.222976	0.975172	9.18385e-19	0.00702264	0.950568
FBgn0037912	sea	3.66	2.63	3.83	186.16	193.17	165.93	128.67	129.29	112.25	113.44	112.36	108.98	97.17	105.53	102.17	46.83	50.39	52.09	3.37333	0.649333	181.753	14.1446	123.403	9.66404	111.593	2.32674	101.623	4.20672	49.77	2.68425	6.23904	0	5.53117	3.94687e-269	-0.740943	2.78523e-15	-0.98143	6.67649e-38	5.10703	1.145e-247	-1.17637	4.39271e-61	-1.40187	1.83084e-73	-2.43474	5.02889e-196	3.70268	3.49252e-106
FBgn0037913	fabp	451.07	491.26	451.89	1874.8	2041.65	2044.72	1552.12	1617.23	1517.55	1356.17	1454.58	1360	1773.99	1797.48	1737.45	1616.6	1674.12	1596.2	464.74	22.9707	1987.06	97.2292	1562.3	50.6137	1390.25	55.7443	1769.64	30.2505	1628.97	40.4068	2.59356	3.92582e-136	2.09493	7.83575e-112	-0.5321	6.39107e-10	-0.796929	2.97974e-29	1.64832	5.03194e-94	-0.265249	6.04239e-09	-0.00637319	0.910588	-0.853785	9.82272e-36	1.63877	1.09012e-113
FBgn0263316	Mrp4	16.01	18.5	23.68	7.99	9.57	7.41	13.97	11.96	12.33	2.88	2.72	3.01	1.06	1.5	1.51	0.13	0.03	0.09	19.3967	3.91283	8.32333	1.11791	12.7533	1.06978	2.87	0.145258	1.35667	0.25697	0.0833333	0.0503322	-0.718075	5.08945e-06	-0.252499	0.101728	0.432237	0.00114178	-1.82113	1.75074e-31	-2.68892	4.22071e-56	-4.09476	4.29516e-18	-5.25847	1.15483e-32	-7.1178	7.47642e-73	-7.94314	9.45993e-86
FBgn0037915	CG6790	7.87	10.14	8.31	0.57	0.43	0.51	2.11	1.64	2.32	0.16	0.24	0.49	0.01	0.03	0.07	0.05	0.09	0.11	8.77333	1.20384	0.503333	0.0702377	2.02333	0.348186	0.296667	0.172143	0.0366667	0.0305505	0.0833333	0.0305505	-3.63293	8.72729e-59	-1.76576	4.86252e-19	1.83071	2.32693e-10	-1.09808	0.109794	-4.92174	9.73944e-37	1.07279	0.45544	-2.00443	0.0600683	-3.12158	2.22394e-05	-6.8386	2.27029e-39
FBgn0037916	CG5342	2.86	4.8	4.15	0.33	0.24	0.23	0.6	0.55	0.61	0.09	0.04	0.07	0.05	0.13	0.04	0.09	0.19	0.14	3.93667	0.987438	0.266667	0.0550757	0.586667	0.0321455	0.0666667	0.0251661	0.0733333	0.0493288	0.14	0.05	-3.40118	2.81789e-25	-2.38919	2.71226e-18	0.975986	0.0472182	-2.36265	0.0399951	-5.91786	1.06397e-13	0.814059	0.483964	0.920101	0.543825	-1.50957	0.0637946	-5.03176	5.09555e-24
FBgn0037917	wkd	29.81	35.64	37.3	31.2	27.23	27.11	26.74	28.22	26.1	49.42	53.35	48.03	54.1	52.83	55.65	65.09	55.87	62.31	34.25	3.93371	28.5133	2.3275	27.02	1.08738	50.2667	2.75921	54.1933	1.41231	61.09	4.72952	0.237249	0.0686478	0.00905845	0.946218	-0.260231	0.026115	0.539852	1.48086e-07	0.627066	3.60352e-09	0.0320936	0.678855	0.0467309	0.603874	0.534459	1.1412e-07	0.668346	4.13536e-10
FBgn0037918	CG6791	33.92	37.75	41.36	20.49	16.69	16.74	20.21	21.08	18.54	32.67	35.24	32.07	27.27	28.1	29.31	39.83	36.75	40.84	37.6767	3.72054	17.9733	2.17964	19.9433	1.29083	33.3267	1.68393	28.2267	1.02588	39.14	2.13052	-0.567574	1.05426e-05	-0.568212	5.07606e-08	-0.0322785	0.881172	0.611927	2.10113e-08	-0.105259	0.286654	0.329348	1.25683e-08	-0.0026977	0.974698	0.557159	1.89468e-07	-0.113073	0.236178
FBgn0051363	Jupiter	395.13	416.32	430.03	268.36	283.9	298.24	332.7	329.02	359.72	489.72	560.2	506.41	365.81	360.24	378.87	414.13	363.47	419.35	413.827	17.5831	283.5	14.944	340.48	16.7636	518.777	36.8315	368.307	9.56265	398.983	30.866	-0.045991	0.693721	0.065895	0.503913	0.0781529	0.578944	0.589007	1.77405e-12	0.39397	9.75972e-07	-0.0282453	0.659694	-0.612816	8.25471e-24	-0.0750568	0.403475	-0.22316	0.00532584
FBgn0037920	CG14710	39.37	42.73	39.2	12.01	11.88	12.52	15.34	15.58	15.43	36.51	37.66	38.82	47.37	46.54	48.94	57.23	55.21	61.17	40.4333	1.99079	12.1367	0.33828	15.45	0.121244	37.6633	1.155	47.6167	1.21887	57.87	3.03111	-1.23783	2.28924e-21	-1.04181	2.20739e-19	0.162505	0.299867	1.35043	2.58431e-30	-0.0358935	0.763219	0.140417	0.0508876	0.389911	2.38974e-05	1.68721	1.53508e-62	0.3488	0.000199603
FBgn0037921	CG6808	43.16	34.49	37.55	5.2	4.78	3.53	4.25	3.92	4.03	8.36	7.52	8.05	16.35	14.85	15.17	14.68	10.17	13.12	38.4	4.39706	4.50333	0.868696	4.06667	0.168028	7.97667	0.424774	15.4567	0.790021	12.6567	2.29042	-2.60944	1.76241e-42	-2.90026	1.04216e-73	-0.323746	0.18981	0.548846	0.0211536	-2.20919	5.38586e-34	-0.419864	0.00526906	0.440323	0.0447335	0.934627	1.96012e-05	-1.77109	1.54242e-22
FBgn0037922	CG14711	50.02	53.46	52.86	30.85	25.53	26.83	33.58	34.65	33.16	53.52	59.46	61	101.78	94.82	99.11	115.5	123.32	118.46	52.1133	1.83753	27.7367	2.77347	33.7967	0.768266	57.9933	3.9498	98.57	3.51128	119.093	3.94828	-0.412815	0.00202646	-0.277586	0.00749941	0.102953	0.545542	0.782086	8.52195e-11	0.219654	0.0332651	0.124725	0.0479281	0.805798	3.67801e-22	1.53583	5.86442e-49	1.02015	6.46657e-39
FBgn0037923	CG6813	27.01	31.94	29.52	10.56	11.11	11.41	12.9	10.43	13.13	12.41	10.04	12.84	10.82	11.41	11.22	6.17	7.07	7.48	29.49	2.46514	11.0267	0.431084	12.1533	1.49687	11.7633	1.50786	11.15	0.301164	6.90667	0.670099	-0.918269	1.71846e-10	-0.930946	8.5884e-10	-0.0462078	0.872263	-0.194882	0.369329	-1.26475	3.6815e-14	-0.840012	1.89052e-06	-1.00316	2.51984e-05	-1.24758	9.01708e-11	-2.26846	8.2245e-47
FBgn0042205	CG18764	22.83	24.1	25.85	6.73	5.15	6.4	7.19	7.65	6.54	12.03	14.04	13.15	26.82	24.54	27.61	27.04	22.95	27.47	24.26	1.51634	6.09333	0.833447	7.12667	0.557704	13.0733	1.00719	26.3233	1.59412	25.82	2.49477	-1.49519	4.71078e-18	-1.42069	4.06081e-25	0.0423872	0.908063	0.820857	7.40049e-05	-0.822511	6.44306e-09	-0.163137	0.142167	0.752136	5.19959e-07	1.52038	7.03546e-19	-0.0739011	0.556611
FBgn0037924	CG14712	38.16	35.63	35.87	24.37	33.97	24.02	28.38	25.08	25.21	75.86	84.43	77.69	100.63	97.01	103.37	129.62	125.71	129.81	36.5533	1.39658	27.4533	5.64631	26.2233	1.86886	79.3267	4.51334	100.337	3.19013	128.38	2.31424	0.0764261	0.672675	-0.137351	0.270465	-0.24808	0.165298	1.25369	8.76665e-25	1.18215	1.74016e-31	0.210957	1.2402e-08	0.459263	3.10609e-22	1.66276	3.28496e-45	1.63877	2.42477e-83
FBgn0262081	Csk	71.18	88.84	93.53	52.16	50.3	52.53	55.83	54.98	59.52	82.84	90.26	86.22	74.19	75.13	77.66	77.67	75.65	77.57	84.5167	11.7855	51.6633	1.19509	56.7767	2.41351	86.44	3.71489	75.66	1.79469	76.9633	1.13848	-0.205406	0.0884286	-0.221479	0.0560818	-0.0489331	0.710717	0.460631	2.82482e-10	0.105285	0.324641	-0.120204	0.00334195	-0.402208	2.4144e-18	0.00743637	0.919388	-0.301744	0.00338004
FBgn0037926	Elp1	65.14	61.36	68.23	67.57	67.38	58.25	57.26	53.81	49.52	36.58	34.99	32.74	28.77	33.74	32.1	33.6	30.9	32.12	64.91	3.44077	64.4	5.3269	53.53	3.87759	34.77	1.92943	31.5367	2.53244	32.2067	1.35208	0.482938	8.39782e-06	0.0662505	0.571724	-0.44939	1.57069e-06	-1.16544	5.72428e-43	-0.832145	8.13847e-16	-0.114196	0.182424	-0.347075	2.23132e-06	-1.56394	2.04261e-94	-1.18285	1.05281e-40
FBgn0259227	CG42327	6.32	7.93	8.18	16.17	15.83	16	17.26	17.26	18.4	30.87	34.27	32.08	27.42	27.88	28.77	24.17	22.39	24.69	7.47667	1.00947	16	0.17	17.64	0.658179	32.4067	1.72338	28.0233	0.686319	23.75	1.20615	1.60088	7.18791e-43	1.59058	5.19991e-44	-0.0431396	0.752416	0.737749	9.23831e-21	2.18841	3.01467e-93	-0.380132	2.53804e-12	-0.681256	3.83163e-26	0.00471923	0.95527	1.50093	1.47546e-43
FBgn0037930	CG14715	156.68	131.85	137.68	188.52	196.19	194.35	161.05	166.92	177.39	156.84	150.52	145.65	215.11	215.36	202.94	200.26	224.7	202.35	142.07	12.9841	193.02	4.00424	168.453	8.27721	151.003	5.61064	211.137	7.09962	209.103	13.5475	0.933864	1.30791e-11	0.587062	2.63826e-05	-0.38085	3.23405e-05	-0.633404	3.83647e-13	0.151329	0.288358	-0.16487	0.0363096	0.229842	0.0155097	-0.455443	1.33185e-07	0.380671	0.00451694
FBgn0037931	CG18476	20.36	19.38	20.58	7.16	6.58	6.38	6.93	7.04	6.82	18.07	18.66	19.54	15.54	14.52	16.49	18.5	16.88	18.27	20.1067	0.638853	6.70667	0.405134	6.93	0.11	18.7567	0.739752	15.5167	0.985207	17.8833	0.876489	-1.09044	1.04034e-17	-1.19221	3.62239e-25	-0.134576	0.395696	1.20267	1.37715e-25	-0.0371813	0.76109	0.0634505	0.510972	-0.297254	0.00313032	0.852229	5.53305e-15	-0.339841	0.000892466
FBgn0011290	Taf12	166.79	128.55	143.84	64.45	62.42	62.98	74.39	71.32	71.67	99.35	102.54	97.79	154.36	142.6	152.17	144.9	133.83	138.43	146.393	19.2474	63.2833	1.04844	72.46	1.68057	99.8933	2.42116	149.71	6.25405	139.053	5.56126	-0.719382	4.08273e-06	-0.675459	6.2085e-06	0.010488	0.945599	0.378749	2.03843e-05	-0.490167	0.00107707	-0.249787	2.41578e-05	0.242233	0.000802039	0.569622	2.69651e-13	-0.250941	0.0874183
FBgn0037933	Ho	30.44	35.67	34.98	34.57	30.54	30.97	32.62	35.17	38.13	69.14	66.19	75.89	72.87	70.99	74.16	77.04	65.66	71.43	33.6967	2.84138	32.0267	2.21306	35.3067	2.75754	70.4067	4.97251	72.6733	1.59412	71.3767	5.69019	0.426381	0.00106387	0.418141	0.00142757	-0.0411653	0.845031	0.853159	4.97049e-14	1.13018	6.57608e-24	-0.165976	0.0319172	-0.20818	0.0511203	0.592252	5.10425e-08	0.916571	2.04993e-18
FBgn0037934	CG6830	26.35	13.74	25.68	0.3	0.54	0.28	0.95	0.74	0.96	3.16	3.55	3.32	0.35	0.37	0.38	0	0	0	21.9233	7.09489	0.373333	0.144684	0.883333	0.124231	3.34333	0.196044	0.366667	0.0152753	0	0	-5.37405	2.13098e-64	-4.28937	8.79628e-57	1.05223	0.021894	2.87234	2.39622e-17	-2.65223	2.84675e-22	-6.19982	1.04116e-05	-9.47279	2.8607e-14	-6.63988	3.79129e-06	-12.1295	7.82159e-23
FBgn0037935	CG6834	0.27	0.1	0.37	0.12	0.08	0.09	0.08	0.19	0.23	0.08	0.07	0.18	0	0.01	0.03	0	0	0	0.246667	0.136504	0.0966667	0.0208167	0.166667	0.0776745	0.11	0.0608276	0.0133333	0.0152753	0	0	-0.884829	0.318155	-0.221702	0.804999	0.630866	0.586064	-0.172049	0.898428	-1.21875	0.237787	-1.44945	NA	-4.54218	0.0409742	-4.7281	0.0127924	-5.71159	0.000384737
FBgn0037936	CG6908	0.14	0.04	0.35	0.49	0.55	0.3	0.53	0.58	1.23	12.18	14.19	14.69	0.3	0.78	0.59	0	0	0	0.176667	0.158219	0.446667	0.130512	0.78	0.390512	13.6867	1.32855	0.556667	0.24173	0	0	1.82	0.0569975	2.48101	0.00389514	0.630995	0.450262	4.65497	1.0901e-61	6.26111	2.94086e-51	-5.74893	0.000161092	-10.4479	1.67725e-17	-5.84007	0.000180898	-4.11144	0.0664862
FBgn0042110	CG18765	0	0.08	0.15	0.54	0.24	0.23	0.13	0.2	0.35	0	0	0	0.1	0.03	0.03	0	0	0	0.0766667	0.0750555	0.336667	0.176163	0.226667	0.112398	0	0	0.0533333	0.0404145	0	0	2.67214	0.0346063	1.9713	0.162378	-0.724422	0.561873	-4.41293	0.0191276	-1.87501	NA	-2.21007	NA	NA	NA	-5.23834	0.00290957	-2.66202	0.469719
FBgn0037937	Fer3	0	0	0.04	0	0.06	0	0.04	0.03	0.03	0	0	0	0.05	0	0	0	0	0	0.0133333	0.023094	0.02	0.034641	0.0333333	0.0057735	0	0	0.0166667	0.0288675	0	0	0.575609	NA	1.30645	NA	0.668049	NA	0.345083	NA	0.77262	NA	0.0332091	NA	NA	NA	-0.461867	NA	0.0136972	NA
FBgn0265271	CG14717	0.17	0.08	0.06	0.03	0	0	0	0	0.01	0	0	0	0	0	0	0	0	0	0.103333	0.0585947	0.01	0.0173205	0.00333333	0.0057735	0	0	0	0	0	0	-2.74938	0.230253	-3.74055	0.0932495	-1.02923	NA	0.193238	NA	-2.68581	NA	NA	NA	NA	NA	-0.643221	NA	-3.46345	0.140311
FBgn0037939	CG14718	0.12	0.04	0.03	0	0	0.01	0	0	0	0	0	0	0	0	0	0	0	0	0.0633333	0.0493288	0.00333333	0.0057735	0	0	0	0	0	0	0	0	-3.50193	0.150335	-4.52829	0.0766586	-1.06186	NA	1.03155	NA	-2.61481	NA	NA	NA	NA	NA	0.193782	NA	-3.39875	0.166172
FBgn0025821	I-t	0.18	0.11	0.21	0	0	0	0	0	0	0	0	0	0	0	0	0	0	0	0.166667	0.051316	0	0	0	0	0	0	0	0	0	0	-4.38214	0.100143	-4.44943	0.0770856	NA	NA	NA	NA	-2.54042	NA	NA	NA	NA	NA	NA	NA	-3.30409	0.16673
FBgn0037940	CG14720	0	0	0	0	0	0	0	0	0	0	0	0	0	0	0	0	0	0	0	0	0	0	0	0	0	0	0	0	0	0	NA	NA	NA	NA	NA	NA	NA	NA	NA	NA	NA	NA	NA	NA	NA	NA	NA	NA
FBgn0037941	CG12594	0.17	0.13	0.1	0	0.02	0	0	0	0.04	0	0	0	0	0	0	0	0	0	0.133333	0.0351188	0.00666667	0.011547	0.0133333	0.023094	0	0	0	0	0	0	-3.77516	0.0161121	-2.80185	0.0664623	0.981324	NA	-0.237327	NA	-4.25837	0.0146836	NA	NA	NA	NA	-1.08128	NA	-5.05333	0.00232107
FBgn0037942	CG14721	49.26	43.48	47.49	46.79	48.73	49.36	49.82	47.32	50.84	29.69	30.48	30.88	38.54	39.38	38.7	38.8	43.94	45.04	46.7433	2.96146	48.2933	1.33949	49.3267	1.81111	30.35	0.605558	38.8733	0.446019	42.5933	3.33085	0.541609	5.26537e-05	0.420342	0.000878039	-0.155055	0.182406	-0.953321	1.66416e-17	-0.56027	3.94312e-05	-0.0158611	0.890882	0.254546	0.0510836	-0.750635	1.39759e-12	-0.309853	0.0196713
FBgn0002906	Blm	21.19	21.69	23.17	13.51	15.49	13.63	14.24	12.13	14.13	51.83	55.45	45.05	45.28	45.53	51.37	67.55	59.03	64.05	22.0167	1.02963	14.21	1.11014	13.5	1.18773	50.7767	5.27941	47.3933	3.44616	63.5433	4.28254	-0.134696	0.240385	-0.359658	0.00119305	-0.258756	0.0351545	1.55927	3.10133e-56	1.27518	8.17873e-33	0.279609	3.08574e-05	0.0869137	0.321696	1.59529	1.64065e-89	1.35849	2.34665e-62
FBgn0037943	CG14722	54.08	57.78	56.72	75.74	86.31	75.23	71.47	70.97	71.04	53.35	56.3	52.83	71.07	69.5	71.68	70.57	70.51	70.53	56.1933	1.9054	79.0933	6.25502	71.16	0.27074	54.16	1.87144	70.75	1.12468	70.5367	0.0305505	0.989383	8.25316e-23	0.687301	1.29186e-15	-0.335933	0.000118951	-0.824508	4.16614e-23	0.0163003	0.864749	-0.15078	0.0034923	0.143773	0.0404669	-0.731357	2.14255e-23	0.15664	0.0267851
FBgn0037944	CG6923	36.43	35.64	41.11	18.21	16.81	16.72	20.79	20.24	20.58	41.94	48.34	44.12	32.2	32.79	35.39	52.42	52.07	52.46	37.7267	2.95656	17.2467	0.835484	20.5367	0.277549	44.8	3.25374	33.46	1.69726	52.3167	0.214554	-0.631174	4.94174e-09	-0.530629	2.3947e-08	0.0679959	0.569075	1.09684	1.22867e-37	0.31556	0.00204424	0.499496	1.92794e-22	-0.0117388	0.876515	1.03452	4.21366e-47	0.300227	0.000595048
FBgn0262364	CG43062	43.19	57.36	48.67	2.04	1.96	1.56	2.86	1.69	1.72	1.94	2.59	0.65	1.66	1.33	1.4	0.58	0.27	0.47	49.74	7.14534	1.85333	0.257164	2.09	0.667008	1.72667	0.987438	1.46333	0.173877	0.44	0.157162	-4.2509	2.74703e-76	-4.23594	1.96008e-68	-0.0121703	0.98978	-0.322473	0.683025	-4.65555	1.1435e-39	-1.80765	0.031542	-2.18827	0.0386717	-2.5714	0.00139202	-6.89568	4.35106e-40
FBgn0017581	Lk6	233.4	250.72	313.45	302.55	227.41	256.48	246.37	249.88	250.27	324.95	300.47	279.78	381.4	368.05	391.25	373.81	352.92	384.76	265.857	42.117	262.147	37.8892	248.84	2.14795	301.733	22.6115	380.233	11.6439	370.497	16.1765	0.484438	0.00154634	0.25666	0.0289469	-0.259579	0.0602244	-0.0781834	0.554683	0.25579	0.0446737	-0.181974	2.06454e-06	0.0604176	0.3703	-0.0697323	0.556522	0.310488	0.00797406
FBgn0265276	l(3)neo38	26.35	31.13	39.27	16.18	15.65	13.92	21.51	22.58	19.94	9.09	9.22	10.4	3.14	3.13	3.31	1.43	1.42	1.3	32.25	6.53241	15.25	1.18191	21.3433	1.32787	9.57	0.721734	3.19333	0.10116	1.38333	0.0723418	-0.576388	5.87145e-05	-0.241424	0.107809	0.30287	0.0041305	-0.957497	3.06703e-20	-1.68189	1.88225e-30	-1.35944	3.95893e-12	-3.03203	1.61626e-58	-4.03798	2.17138e-128	-4.7175	1.44226e-121
FBgn0037949	CG17360	15.52	18.81	21.11	8.74	7.56	8.26	13.15	13.34	11.78	27.27	29.17	28.5	19.04	18.98	22.15	27.84	25.57	28.15	18.48	2.80957	8.18667	0.593408	12.7567	0.851136	28.3133	0.963656	20.0567	1.81313	27.1867	1.40863	-0.670055	1.23098e-06	-0.182606	0.175384	0.455848	0.000154696	1.50909	3.97729e-53	0.688207	1.73406e-09	0.296059	0.000106932	-0.290479	1.09604e-05	1.16537	8.59324e-33	0.390207	0.00104779
FBgn0037950	HisCl1	14.89	14.93	17.69	0.06	0.11	0.14	0.18	0.22	0.22	0.07	0.06	0	0.02	0	0.02	0	0	0	15.8367	1.60516	0.103333	0.0404145	0.206667	0.023094	0.0433333	0.0378594	0.0133333	0.011547	0	0	-6.74674	2.45301e-74	-5.90263	5.91828e-94	0.826601	0.512064	-1.42912	0.484784	-8.30329	2.76823e-15	-0.873869	NA	-2.51303	0.582664	-4.03611	0.0751967	-10.9226	1.993e-19
FBgn0025802	Sbf	11.42	15.12	15.18	11.1	11.23	10.56	17.65	17.44	16.41	23.27	22.45	21.27	15.19	16.48	16.72	15.63	14.98	14.63	13.9067	2.15373	10.9633	0.355293	17.1667	0.663652	22.33	1.00539	16.13	0.822861	15.08	0.507445	0.160352	0.229246	0.655716	4.88415e-08	0.462715	3.10837e-09	0.748185	3.04116e-20	0.758188	3.09542e-10	-0.243303	0.000523218	-0.804131	5.26138e-29	-0.107	0.184678	-0.0493472	0.695511
FBgn0051116	ClC-a	1.87	2.2	2.27	1.9	1.31	1.95	7.27	7.6	6.75	3.77	4.73	4.68	1.45	1.11	1.41	0	0	0.03	2.11333	0.21362	1.72	0.355949	7.20667	0.428525	4.39333	0.540401	1.32333	0.185831	0.01	0.0173205	0.208055	0.450842	2.12019	1.50398e-50	1.88215	2.99503e-23	1.06751	8.86797e-06	1.12452	7.26275e-10	-6.81398	3.91855e-10	-8.63267	2.09164e-16	-7.62405	1.40493e-12	-7.51208	1.03553e-12
FBgn0259139	glo	206.51	251.96	231.83	163.88	202.15	143.8	208.15	202.54	169.84	211.99	215.07	220.37	157.52	152.88	162.45	159.81	136	168.84	230.1	22.7743	169.943	29.6438	193.51	20.6898	215.81	4.23873	157.617	4.78573	154.883	16.9653	0.0580342	0.712011	0.0977346	0.456752	0.0067879	0.979852	0.0681433	0.575742	-0.0222512	0.813818	-0.168183	0.0235252	-0.711828	1.39328e-23	-0.696591	4.70878e-09	-0.739466	3.46945e-12
FBgn0019624	COX5A	624.55	479.68	465.15	672.63	685.68	567.37	615.43	626.97	507.04	381.64	389.87	387.71	555.93	550.86	520.65	551.86	639.15	571.91	523.127	88.1351	641.893	64.8681	583.147	66.1624	386.407	4.26699	542.48	19.0745	587.64	45.7216	0.779051	6.53031e-06	0.492247	0.00644095	-0.319987	0.0126593	-1.01048	9.63661e-38	-0.378807	0.0208994	-0.031878	0.711014	0.369309	2.09173e-06	-0.692328	1.42213e-13	-0.0103002	0.952417
FBgn0037955	CG6950	113.23	90.49	97.77	89.34	84.53	82.72	71.58	70.89	72.39	62.23	64.77	58.83	96.68	93.2	97.18	101.76	105.91	100.17	100.497	11.6126	85.53	3.42142	71.62	0.7508	61.9433	2.98036	95.6867	2.16798	102.613	2.96362	0.257527	0.0987884	-0.148828	0.337272	-0.439567	3.13732e-09	-0.742489	4.4082e-18	-0.635612	1.1164e-05	-0.0479738	0.450428	0.48798	1.81071e-10	-0.305515	7.20267e-05	-0.146713	0.300788
FBgn0037956	CG6959	0.21	0.44	0.42	9.95	12.52	11.33	14.8	13.23	13.64	4.98	5.39	5.84	1.73	1.6	1.54	0	0	0.02	0.356667	0.12741	11.2667	1.28617	13.89	0.81431	5.40333	0.430155	1.62333	0.0971253	0.00666667	0.011547	5.49318	3.00687e-113	5.64312	5.00911e-146	0.115665	0.529857	-1.34809	8.44023e-18	3.99774	5.13788e-46	-7.49261	3.59652e-09	-9.31354	4.04848e-14	-10.7093	7.86297e-19	-5.32425	0.000177287
FBgn0003312	sad	1	0.83	1.22	8	9.32	9.52	8.32	12.92	7.95	2.97	3.28	5.39	1.02	1.5	0.88	0.04	0	0.07	1.01667	0.195533	8.94667	0.825914	9.73	2.76881	3.88	1.31685	1.13333	0.325167	0.0366667	0.0351188	3.62821	8.07248e-55	3.60121	5.01912e-37	-0.063286	0.878801	-1.52255	1.38101e-09	1.97271	3.41446e-08	-4.79666	2.58067e-06	-6.64192	3.95525e-12	-8.17832	7.02654e-21	-4.67207	4.25212e-06
FBgn0037958	CG6962	25.41	28.07	25.77	20.77	26.03	22.06	23.88	23.09	22.66	32.99	35.19	34.78	28.23	29.69	30.55	41.4	40.61	44.27	26.4167	1.4431	22.9533	2.74143	23.21	0.618789	34.32	1.16991	29.49	1.17286	42.0933	1.92599	0.293481	0.0337338	0.159345	0.156781	-0.16857	0.248348	0.299698	0.00875097	0.445404	8.39059e-06	0.37051	2.94904e-08	0.0625868	0.479905	0.309586	0.00331153	0.50316	8.33521e-09
FBgn0051368	CG31368	53.37	57.82	54.57	32.69	35.19	30.63	33.18	32.68	32.32	33.84	33.09	34.8	24.28	26.5	26.11	36.58	34.52	33.21	55.2533	2.30235	32.8367	2.28354	32.7267	0.431895	33.91	0.857146	25.63	1.18528	34.77	1.69885	-0.255212	0.0133596	-0.409878	5.09706e-06	-0.188206	0.0277317	-0.234198	0.00341656	-0.637449	5.74755e-14	0.293867	1.78091e-05	-0.198005	0.00761036	-0.48369	2.20792e-10	-0.839662	1.02718e-26
FBgn0037960	mthl5	0.99	0.85	1.47	8.49	11.2	10.24	12.58	11.71	12.04	9.36	11.17	11.81	12.36	10.83	12.72	18.05	16.07	18.14	1.10333	0.325167	9.97667	1.37406	12.11	0.439204	10.78	1.27071	11.97	1.00354	17.42	1.17	3.66862	9.94285e-52	3.79214	1.12602e-73	0.0921798	0.696047	-0.175838	0.373345	3.34296	9.79986e-42	0.40215	0.000327797	0.468563	0.00193806	0.238991	0.125039	3.79773	1.16109e-70
FBgn0037962	CG6971	2.59	1.75	1.98	0.17	0.1	0.2	0	0.09	0.08	0.51	0.22	0.19	0.13	0	0.21	0.09	0	0	2.10667	0.434089	0.156667	0.051316	0.0566667	0.0493288	0.306667	0.17673	0.113333	0.105987	0.03	0.0519615	-3.29292	6.49406e-07	-4.80225	8.26753e-09	-1.58166	0.457816	0.723577	0.632341	-2.6934	0.000616189	-1.85397	0.510972	-3.39905	0.120865	-2.73838	0.210894	-6.11567	4.21919e-06
FBgn0037963	Cad87A	29.09	31.32	35.42	24.54	21.6	22.45	37.36	36.15	36.52	48.06	47.47	51.62	11.75	13.45	13.45	19.55	17.97	19	31.9433	3.21071	22.8633	1.51296	36.6767	0.620027	49.05	2.24515	12.8833	0.981495	18.84	0.80206	0.0189217	0.885962	0.548622	4.71441e-10	0.497483	3.21553e-09	0.819252	3.19922e-22	0.688368	1.03348e-13	0.404229	7.06779e-08	-1.6128	4.40089e-149	-0.846034	1.5999e-23	-0.930534	9.0276e-25
FBgn0085336	CG34307	0	0.28	0.37	0	0.1	0	0	0	0	0	0	0	0	0	0	0	0	0	0.216667	0.192959	0.0333333	0.057735	0	0	0	0	0	0	0	0	-2.13082	0.447999	-4.44267	0.159653	-2.31769	NA	-0.216173	NA	-2.53476	NA	NA	NA	NA	NA	-1.0115	NA	-3.2926	0.302681
FBgn0037964	CG14731	0.11	0.07	0.16	0.13	0.06	0.05	0.31	0.13	0.11	0.22	0.19	0.17	0.02	0.02	0.02	0	0	0	0.113333	0.0450925	0.08	0.043589	0.183333	0.110151	0.193333	0.0251661	0.02	0	0	0	0.0352366	0.978996	1.03089	0.306885	0.976796	0.4695	0.974108	0.444957	0.854791	0.418972	-1.48055	NA	-4.90964	0.0142	-4.00344	0.0804016	-4.05785	0.0460767
FBgn0051211	CG31211	31.86	36.31	40.23	37.45	31.59	30.22	35.16	33.82	33.7	24.81	27.13	24.68	22.9	24.03	24.05	24.87	24.2	24.57	36.1333	4.1878	33.0867	3.84034	34.2267	0.810514	25.54	1.37851	23.66	0.658255	24.5467	0.335609	0.37359	0.00448992	0.271891	0.0077641	-0.133446	0.330161	-0.651467	5.03052e-09	-0.427807	9.42021e-05	-0.0921453	0.222505	-0.294682	0.00063243	-0.996668	3.31755e-21	-0.726394	7.73621e-13
FBgn0013275	Hsp70Aa	4.99	0	0	0	0	0	0	0	0	0	0	0	0	0	10.21	0	0	0	1.66333	2.88098	0	0	0	0	0	0	3.40333	5.89475	0	0	-23.3251	NA	-23.3694	NA	NA	NA	NA	NA	-20.0319	NA	-23.2285	NA	NA	NA	NA	NA	-22.3638	NA
FBgn0013276	Hsp70Ab	206.11	240.58	415.35	326.82	140.96	75.33	184.68	125.61	11.66	4.5	5.29	6.94	9.79	79.4	95.93	32.56	31.68	36.2	287.347	112.186	181.037	130.447	107.317	87.9486	5.57667	1.245	61.7067	45.7145	33.48	2.39633	-0.162103	0.815987	-1.06874	0.336404	-0.928344	0.598909	-5.29645	1.1732e-16	-5.62077	1.801e-115	-1.02561	0.299611	2.3793	2.60878e-55	-2.99625	1.40365e-06	-3.26389	4.2756e-47
FBgn0260741	CG3281	33.2	40.4	35.13	11.56	12.47	10.27	16.83	15.38	14.95	29.82	27.63	29.67	31.82	30.48	32.63	40.24	40.91	42.26	36.2433	3.72688	11.4333	1.10546	15.72	0.985038	29.04	1.2234	31.6433	1.08583	41.1367	1.0289	-1.16778	2.7212e-18	-0.85847	3.16909e-12	0.275829	0.044459	1.06494	1.37517e-18	-0.250707	0.0437659	0.233268	0.000931299	0.270419	0.00603578	1.28218	1.67662e-36	0.0142708	0.894365
FBgn0000147	aurA	89.52	98.95	80.17	29.89	28.79	28.87	37.08	33.96	36.85	73.41	73.93	72.45	122.66	118.77	120.83	152.88	167.24	161.58	89.5467	9.39003	29.1833	0.613297	35.9633	1.73874	73.2633	0.750822	120.753	1.94613	160.567	7.23343	-1.12269	1.20612e-16	-0.972938	1.07306e-13	0.116687	0.332716	1.04774	5.82863e-34	-0.222932	0.0756864	0.263828	2.18613e-06	0.896096	1.0798e-37	1.89252	6.43305e-129	0.670809	3.2964e-09
FBgn0260742	CG12213	40.1	45.34	41.07	27.32	29.17	25.4	36.34	34.62	32.42	54.8	57.57	58.76	58.67	54.38	57.08	77.49	74.7	75.39	42.17	2.78781	27.2967	1.88511	34.46	1.96489	57.0433	2.03185	56.71	2.1688	75.86	1.45317	-0.131369	0.285638	0.0544281	0.6574	0.152449	0.188852	0.782634	1.73614e-20	0.503415	1.20335e-07	0.274686	8.76723e-07	0.178676	0.00928225	0.909111	1.83578e-34	0.677302	3.21732e-17
FBgn0260743	GC1	40.16	49.92	46.78	106.41	105.52	115.34	112.89	115.18	116.26	128.14	130.38	127.87	142.73	149.56	147.35	153.46	157.2	155.82	45.62	4.98233	109.09	5.43092	114.777	1.72082	128.797	1.37784	146.547	3.48514	155.493	1.89128	1.76079	4.24897e-50	1.68115	8.3126e-62	-0.112829	0.369875	-0.043196	0.669388	1.56873	5.65118e-64	-0.0611869	0.264258	0.0358774	0.563177	-0.0574867	0.517512	1.60103	1.2426e-73
FBgn0260744	Tango9	39.52	39.98	42.39	36.16	30.76	31.28	34.03	34.18	33.26	45.67	47.48	45.81	72.58	69.1	68.69	77.63	73.08	75.86	40.63	1.54146	32.7333	2.97895	33.8233	0.493592	46.32	1.00703	70.1233	2.13739	75.5233	2.29361	0.185071	0.159336	0.0818749	0.442097	-0.135381	0.319318	0.222132	0.0480568	0.257793	0.00739863	-0.0367722	0.590526	0.470122	3.71923e-11	0.640427	4.78284e-11	0.723292	3.71318e-20
FBgn0037970	GC2	0	0	0	0	0	0	0	0	0	0	0	0	0	0	0	0	0	0	0	0	0	0	0	0	0	0	0	0	0	0	NA	NA	NA	NA	NA	NA	NA	NA	NA	NA	NA	NA	NA	NA	NA	NA	NA	NA
FBgn0037972	CG10005	1.13	1.69	1.29	0.49	0.72	0.63	0.86	0.91	1.11	0.78	0.67	0.68	0.9	0.81	0.66	0.75	1.06	1.1	1.37	0.288444	0.613333	0.115902	0.96	0.132288	0.71	0.0608276	0.79	0.121244	0.97	0.191572	-0.655811	0.244173	-0.151954	0.770355	0.466213	0.520145	-0.0590025	0.947885	-0.865208	0.165549	0.14391	0.828201	0.20261	0.81457	0.0900843	0.894661	-0.669722	0.203578
FBgn0037973	CG18547	64.3	40.45	55.69	4.81	7.36	4.89	8.2	9.71	6.2	9.45	7.94	8.51	1.53	1.65	1.83	18.17	19.35	20.68	53.48	12.0776	5.68667	1.4497	8.03667	1.76069	8.63333	0.762518	1.67	0.150997	19.4	1.25575	-2.74719	5.11573e-30	-2.39691	5.16252e-24	0.316191	0.387804	0.324058	0.267025	-2.57243	2.68715e-28	3.39265	5.81191e-72	0.935497	1.42583e-06	1.20508	1.64672e-08	-1.64197	5.70843e-15
FBgn0037974	CG12224	9.44	6.28	9.42	0.11	0.29	0.39	0.87	1.04	0.46	0.53	1	0.16	0.15	0.08	0.21	0	0.08	0	8.38	1.81868	0.263333	0.141892	0.79	0.298161	0.563333	0.420991	0.146667	0.0650641	0.0266667	0.046188	-4.44825	3.69044e-26	-3.07284	6.87469e-18	1.3601	0.124408	0.818095	0.476277	-3.72448	8.31721e-15	-2.89753	0.157213	-4.96917	0.00463688	-4.21484	0.0186904	-8.79089	1.40499e-12
FBgn0037975	CG3397	35.23	28.97	31.21	0	0	0	0	0	0	2.05	1.19	0.6	0	0	0	16.73	16.35	14.58	31.8033	3.1719	0	0	0	0	1.28	0.729178	0	0	15.8867	1.14745	-12.4312	1.55556e-24	-12.4977	7.61965e-25	NA	NA	8.03408	8.92937e-08	-4.49858	1.12998e-46	11.1584	1.29034e-19	3.32937	1.48231e-22	11.3524	1.17209e-20	-1.18172	3.21026e-13
FBgn0260745	mfas	5.81	4.8	9.42	33.21	26.02	31.16	68.33	78.21	65.77	102.35	102.36	75.75	8.4	11.19	10.09	0.06	0	0.15	6.67667	2.42887	30.13	3.70401	70.77	6.56914	93.4867	15.3604	9.89333	1.40536	0.07	0.0754983	2.68118	4.2616e-32	3.7594	8.59789e-71	1.04725	2.45474e-15	1.3526	1.14073e-21	3.87982	1.05464e-64	-7.01311	2.3989e-41	-10.3391	2.87317e-94	-9.0411	9.4186e-71	-6.50553	2.01013e-27
FBgn0037976	Tk	0.12	0.43	0.39	0	0.11	0	0.02	0	0	0	0	0	0	0	0	0	0	0	0.313333	0.168622	0.0366667	0.0635085	0.00666667	0.011547	0	0	0	0	0	0	-2.50101	0.12849	-5.28015	0.0018497	-2.77892	NA	-1.64395	NA	-4.34094	0.0151529	NA	NA	NA	NA	-2.47428	0.573473	-5.12908	0.00288777
FBgn0260746	Ect3	4	4.65	5.1	46.78	42.16	39.31	49.08	51.28	52.93	15.38	13.7	15.17	5.9	7.48	6.12	0.07	0	0	4.58333	0.553022	42.75	3.76979	51.0967	1.93154	14.75	0.915369	6.5	0.855804	0.0233333	0.0404145	3.72192	4.05138e-179	3.82965	1.59215e-226	0.0754325	0.594977	-1.81763	1.39562e-56	1.75587	2.28459e-30	-8.21789	7.18016e-15	-9.48898	4.06686e-20	-11.3558	6.0471e-29	-7.73479	1.50228e-13
FBgn0037978	KLHL18	43.33	51.67	46.71	16.38	17.05	15.55	21.83	22.58	21.78	15.24	16.66	16.22	11.84	13.27	13.22	15.19	16.72	15.25	47.2367	4.19487	16.3267	0.751421	22.0633	0.448144	16.04	0.726911	12.7767	0.811562	15.72	0.866545	-1.0344	3.16758e-20	-0.750121	3.73008e-12	0.250814	0.0139596	-0.305824	0.0115366	-1.48864	1.422e-39	0.146531	0.220988	-0.268596	0.0443636	-0.627044	9.81271e-09	-1.7626	1.02324e-61
FBgn0037979	GCC185	14.43	18.14	18.87	14.83	12.88	12.78	14.21	15.23	13.42	33.75	36.16	32.27	19.77	19.63	22.33	27.89	24.33	28.48	17.1467	2.38085	13.4967	1.15578	14.2867	0.907432	34.06	1.96344	20.5767	1.52004	26.9	2.24515	0.157092	0.274649	0.0888566	0.521834	-0.100057	0.537188	1.05729	1.21497e-26	1.06388	4.338e-21	0.245609	0.0028352	-0.573613	2.04387e-13	0.430711	4.3042e-05	0.483762	6.10824e-05
FBgn0037980	DCAF12	12.07	12.83	13.08	8.91	8.86	7.83	9.84	10.35	9.59	28.58	29.85	32.89	24.93	24.92	27.61	32.43	34.6	32.79	12.66	0.526023	8.53333	0.609617	9.92667	0.387341	30.44	2.21475	25.82	1.55019	33.2733	1.16294	-0.0729771	0.644158	-0.00405941	0.978582	0.0357282	0.876002	1.55276	5.94326e-37	1.33023	1.26634e-29	0.216694	0.0132267	-0.104178	0.383161	1.39635	6.42085e-37	1.22048	1.71646e-33
FBgn0037981	Spt3	12.83	13.56	13.71	9.75	8.43	6.33	9.39	9.59	8.14	10.05	11.21	8.57	12.68	12.43	12.83	22.12	26	23.67	13.3667	0.470779	8.17	1.72476	9.04	0.785812	9.94333	1.32323	12.6467	0.202073	23.93	1.95302	-0.21791	0.310751	-0.21807	0.17993	-0.0319823	0.928666	0.0167038	0.951804	-0.344741	0.0516603	0.766473	1.4207e-11	1.01539	2.3136e-09	0.985818	1.16462e-07	0.662996	2.73386e-07
FBgn0051358	CG31358	0.07	0.02	0.05	0	0	0	0	0	0	0	0	0	0	0	0	0	0	0	0.0466667	0.0251661	0	0	0	0	0	0	0	0	0	0	-4.35344	0.114679	-4.41861	0.0903479	NA	NA	NA	NA	-2.50934	NA	NA	NA	NA	NA	NA	NA	-3.30193	0.181454
FBgn0260230	CG42504	0.01	0.02	0	0	0	0	0	0	0	0	0	0	0	0	0	0	0	0	0.01	0.01	0	0	0	0	0	0	0	0	0	0	-2.73002	NA	-2.79684	NA	NA	NA	NA	NA	-0.875289	NA	NA	NA	NA	NA	NA	NA	-1.66783	NA
FBgn0260231	CG42505	0.01	0.02	0	0	0	0	0	0	0	0	0	0	0	0	0	0	0	0	0.01	0.01	0	0	0	0	0	0	0	0	0	0	-2.73002	NA	-2.79684	NA	NA	NA	NA	NA	-0.875289	NA	NA	NA	NA	NA	NA	NA	-1.66783	NA
FBgn0037985	ssp5	0	0.06	0.04	0	0	0	0	0	0	0	0	0	0	0	0	0	0	0	0.0333333	0.0305505	0	0	0	0	0	0	0	0	0	0	-3.59652	0.375191	-3.66614	0.340466	NA	NA	NA	NA	-1.75443	NA	NA	NA	NA	NA	NA	NA	-2.55324	0.495649
FBgn0037986	CG14736	0.09	0.11	0	0	0	0	0	0	0	0	0	0	0	0	0	0	0	0.04	0.0666667	0.0585947	0	0	0	0	0	0	0	0	0.0133333	0.023094	-4.20426	0.223219	-4.26928	0.196286	NA	NA	NA	NA	-2.34961	NA	1.96437	NA	0.214573	NA	2.15669	NA	-2.12915	0.436373
FBgn0037987	CG14739	0	0	0	0.04	0	0	0	0	0	0	0	0	0	0	0	0	0	0	0	0	0.0133333	0.023094	0	0	0	0	0	0	0	0	0.848151	NA	NA	NA	-1.06186	NA	1.03155	NA	NA	NA	NA	NA	NA	NA	0.221365	NA	NA	NA
FBgn0037988	CG14740	0.05	0.15	0.07	0	0	0	0	0	0	0	0	0	0	0	0	0	0	0	0.09	0.052915	0	0	0	0	0	0	0	0	0	0	-4.36424	0.107684	-4.43143	0.0844917	NA	NA	NA	NA	-2.51666	NA	NA	NA	NA	NA	NA	NA	-3.30077	0.177033
FBgn0037989	ATP8B	4.05	4.67	6.15	2.27	2.08	2.13	3.98	4.08	4.25	1.05	1.05	0.75	0.71	0.88	0.64	0	0.04	0	4.95667	1.07895	2.16	0.0984886	4.10333	0.136504	0.95	0.173205	0.743333	0.123423	0.0133333	0.023094	-0.692659	0.000111775	0.0819793	0.660293	0.743087	9.21885e-10	-1.4417	1.80112e-10	-2.28603	3.07999e-23	-6.56264	1.56739e-09	-7.01152	1.35123e-10	-8.54144	1.02247e-16	-9.33764	1.34716e-19
FBgn0051361	dpr17	0.24	0.13	0.11	0.68	0.91	0.59	0.64	0.45	0.65	0	0.06	0.14	0.12	0.13	0.09	0	0	0	0.16	0.07	0.726667	0.165025	0.58	0.112694	0.0666667	0.0702377	0.113333	0.0208167	0	0	2.66165	4.90386e-07	2.18785	6.85521e-05	-0.510268	0.240075	-4.03351	1.15181e-05	-1.44906	0.268694	-4.58396	0.00807608	-3.81663	0.230947	-7.67921	4.03269e-09	-5.11992	0.00260712
FBgn0037992	CG4702	0.08	0	0.08	0	0	0.04	0	0.06	0.02	0	0	0	0	0	0	0	0	0	0.0533333	0.046188	0.0133333	0.023094	0.0266667	0.0305505	0	0	0	0	0	0	-1.57795	0.639556	-0.668491	0.803839	0.877683	NA	0.0471853	NA	-1.67662	NA	NA	NA	NA	NA	-0.77447	NA	-2.45762	0.518977
FBgn0037993	dpr15	0.02	0.03	0.06	0	0	0	0.01	0	0	0	0	0	0	0	0	0	0	0	0.0366667	0.0208167	0	0	0.00333333	0.0057735	0	0	0	0	0	0	-4.2546	0.128936	-3.36287	0.1585	0.862826	NA	NA	NA	-2.41694	NA	NA	NA	NA	NA	NA	NA	-3.22111	0.198856
FBgn0261714	Cpn	0.09	0.07	0.06	0.01	0	0	0	0	0	0	0	0	0	0	0	0	0	0	0.0733333	0.0152753	0.00333333	0.0057735	0	0	0	0	0	0	0	0	-4.05849	0.0522422	-5.0807	0.018126	-1.05611	NA	1.03729	NA	-3.16862	0.146484	NA	NA	NA	NA	0.194767	NA	-3.96182	0.0536672
FBgn0037994	eIF3d2	0.05	0.06	0.06	0	0	0	0	0	0	0	0	0	0	0	0	0	0	0	0.0566667	0.0057735	0	0	0	0	0	0	0	0	0	0	-4.30879	0.111468	-4.37605	0.0866226	NA	NA	NA	NA	-2.46488	NA	NA	NA	NA	NA	NA	NA	-3.25742	0.175596
FBgn0263404	CG43450	0	0	0	0	0	0	0	0	0	0	0	0	0	0	0	0	0	0	0	0	0	0	0	0	0	0	0	0	0	0	NA	NA	NA	NA	NA	NA	NA	NA	NA	NA	NA	NA	NA	NA	NA	NA	NA	NA
FBgn0037995	CG3809	0	0	0.03	0	0	0	0	0	0	0	0	0	0	0	0	0	0	0	0.01	0.0173205	0	0	0	0	0	0	0	0	0	0	-1.0919	NA	-1.15893	NA	NA	NA	NA	NA	0.752462	NA	NA	NA	NA	NA	NA	NA	-0.0288628	NA
FBgn0037996	CG4830	0.63	1.02	0.89	0	0	0	0.02	0	0.01	0	0	0.09	0	0	0	0	0	0	0.846667	0.198578	0	0	0.01	0.01	0.03	0.0519615	0	0	0	0	-7.86429	1.64339e-08	-6.07754	5.73313e-07	1.75669	NA	2.9551	NA	-5.05804	0.000236733	NA	NA	-1.7458	NA	NA	NA	-6.80901	4.73162e-07
FBgn0037998	Cog1	37.74	39.48	37.24	16.62	17.05	12.86	20.92	20.99	17.5	26.07	27.72	27.45	24.09	24.76	26.07	38.57	42.51	38.87	38.1533	1.17581	15.51	2.30502	19.8033	1.99505	27.08	0.885042	24.9733	1.00709	39.9833	2.19329	-0.80652	3.87903e-09	-0.60206	9.05996e-07	0.171822	0.353292	0.526649	1.53567e-05	-0.428105	1.22941e-05	0.529681	1.36211e-13	0.325625	0.000244036	0.801808	1.68391e-11	-0.106122	0.277263
FBgn0037997	CG14742	0	0	0	0.13	0.05	0	0	0.5	0	0	0	0	0.04	0	0	0	0	0	0	0	0.06	0.0655744	0.166667	0.288675	0	0	0.0133333	0.023094	0	0	2.44192	NA	4.03266	0.348695	1.57654	0.723434	-0.540191	NA	NA	NA	0.0555797	NA	NA	NA	-1.32883	NA	NA	NA
FBgn0037999	CG4860	34.34	37.11	33.81	30.04	25.99	24.89	32.22	32.41	25.66	15.97	16.56	18.65	12.77	12.79	12.93	17.3	18.48	16.03	35.0867	1.77218	26.9733	2.71216	30.0967	3.84344	17.06	1.40823	12.83	0.087178	17.27	1.22528	0.116006	0.441356	0.12329	0.435626	-0.0246089	0.924393	-0.945554	3.66001e-11	-0.978471	4.1556e-13	0.273374	0.032445	-0.219432	0.199035	-1.21704	1.80796e-19	-1.20298	2.87676e-23
FBgn0038000	CG10014	0.21	0.4	0.2	0.17	0.03	0.03	0.02	0.1	0.09	0	0	0	0	0	0	0	0	0	0.27	0.112694	0.0766667	0.080829	0.07	0.043589	0	0	0	0	0	0	-1.28816	0.310048	-1.61046	0.16321	-0.367399	0.890107	-2.58011	NA	-3.98761	0.0305529	NA	NA	NA	NA	-3.41194	0.218211	-4.76791	0.00652035
FBgn0038001	CG17404	0	0	0.08	0	0	0	0	0	0.03	0.26	0	0	0	0	0	0	0	0	0.0266667	0.046188	0	0	0.01	0.0173205	0.0866667	0.150111	0	0	0	0	-1.77647	NA	-0.884822	NA	0.861696	NA	3.79463	NA	1.844	NA	NA	NA	-2.55905	0.588495	NA	NA	-0.727381	NA
FBgn0038002	CG12256	0	0	0	0	0	0	0	0	0	0	0	0	0	0	0	0	0	0	0	0	0	0	0	0	0	0	0	0	0	0	NA	NA	NA	NA	NA	NA	NA	NA	NA	NA	NA	NA	NA	NA	NA	NA	NA	NA
FBgn0038003	CG3916	0	0	0	0	0	0	0	0	0	0	0	0	0	0	0	0	0	0	0	0	0	0	0	0	0	0	0	0	0	0	NA	NA	NA	NA	NA	NA	NA	NA	NA	NA	NA	NA	NA	NA	NA	NA	NA	NA
FBgn0011270	Pglym87	0	0	0.03	0	0	0	0	0	0	0	0	0	0	0	0	0	0	0	0.01	0.0173205	0	0	0	0	0	0	0	0	0	0	-1.08308	NA	-1.1501	NA	NA	NA	NA	NA	0.761289	NA	NA	NA	NA	NA	NA	NA	-0.0103933	NA
FBgn0038005	Cyp313a5	0	0	0	0	0	0	0	0	0	0	0	0.11	0	0	0	0	0	0	0	0	0	0	0	0	0.0366667	0.0635085	0	0	0	0	NA	NA	NA	NA	NA	NA	2.9551	NA	2.67365	NA	NA	NA	-1.74153	NA	NA	NA	NA	NA
FBgn0038006	Cyp313a2	0	0	0.02	0.02	0	0	0	0	0	0	0	0.22	0	0	0	0	0	0	0.00666667	0.011547	0.00666667	0.011547	0	0	0.0733333	0.127017	0	0	0	0	-0.132737	NA	-1.16154	NA	-1.06186	NA	3.28157	NA	2.99151	NA	NA	NA	-3.07329	0.515368	0.200321	NA	-0.0342855	NA
FBgn0038007	Cyp313a3	0	0	0	0	0	0	0	0	0.01	0.06	0.06	0	0	0	0	0	0	0	0	0	0	0	0.00333333	0.0057735	0.04	0.034641	0	0	0	0	NA	NA	0.759238	NA	0.861696	NA	3.70986	NA	3.42825	NA	NA	NA	-2.49784	NA	NA	NA	NA	NA
FBgn0038008	CG3942	0.02	0	0	0	0	0	0	0	0.02	0	0.04	0	0	0	0	0	0	0	0.00666667	0.011547	0	0	0.00666667	0.011547	0.0133333	0.023094	0	0	0	0	-1.10293	NA	0.572148	NA	1.63147	NA	2.9551	NA	1.70321	NA	NA	NA	-1.7507	NA	NA	NA	-0.0515966	NA
FBgn0003651	svp	0.65	0.68	0.75	0.07	0.19	0.35	0.28	0.3	0.55	0	0	0	0.01	0.01	0	0	0	0.02	0.693333	0.051316	0.203333	0.140475	0.376667	0.150444	0	0	0.00666667	0.0057735	0.00666667	0.011547	-1.24484	0.0447187	-0.529794	0.251974	0.673476	0.480648	-5.2955	0.00162939	-6.68803	3.47294e-07	-0.242096	NA	0.179515	NA	-5.16384	0.00113234	-6.51315	4.48298e-07
FBgn0264829	CG44037	0	0	0	0	0	0	0	0	0	0	0	0	0	0	0	0	0	0	0	0	0	0	0	0	0	0	0	0	0	0	NA	NA	NA	NA	NA	NA	NA	NA	NA	NA	NA	NA	NA	NA	NA	NA	NA	NA
FBgn0264830	CG44038	0	0	0	0	0	0	0	0	0	0	0	0	0	0	0	0	0	0	0	0	0	0	0	0	0	0	0	0	0	0	NA	NA	NA	NA	NA	NA	NA	NA	NA	NA	NA	NA	NA	NA	NA	NA	NA	NA
FBgn0038009	CG17738	2.03	0.38	1.06	0	0	0	0	0	0	0	0	0	0	0	0	0	0	0	1.15667	0.829237	0	0	0	0	0	0	0	0	0	0	-5.95633	0.00201416	-6.02139	0.00124738	NA	NA	NA	NA	-4.11122	0.0315572	NA	NA	NA	NA	NA	NA	-4.79496	0.0100606
FBgn0259975	Sfp87B	0	0	0	0	0	0	0	0	0.22	0	0	0	0	0	0	0	0	0	0	0	0	0	0.0733333	0.127017	0	0	0	0	0	0	NA	NA	2.20589	NA	2.21043	NA	NA	NA	NA	NA	NA	NA	NA	NA	NA	NA	NA	NA
FBgn0038011	CG4066	0	0	0.04	0.02	0.01	0	0.02	0	0.03	42.39	46.7	40.04	4.93	4.04	4.6	0	0	0	0.0133333	0.023094	0.01	0.01	0.0166667	0.0152753	43.0433	3.37773	4.52333	0.449926	0	0	0.0678075	NA	0.52417	NA	0.439963	NA	11.8428	9.04689e-30	11.5548	2.09636e-28	-9.13212	2.78111e-13	-12.4746	5.17132e-25	-0.715302	NA	-0.771729	NA
FBgn0038012	CG10013	43.07	46.44	41.02	2.54	2.61	3.32	26.38	30.07	28.46	10.8	13.66	22.36	2.31	1.38	1.77	3.05	4.03	2.97	43.51	2.73666	2.82333	0.431548	28.3033	1.84998	15.6067	6.02084	1.82	0.467012	3.35	0.590254	-3.44564	2.26163e-88	-0.274344	0.0422701	3.13706	1.74064e-90	2.16998	4.1471e-15	-1.42678	1.83654e-09	0.719955	0.0210863	-2.46193	1.12358e-16	-0.34035	0.267439	-3.90896	5.3167e-127
FBgn0266261	CG44956	0	0	0.21	0	0	0	0	0	0	0	0	0	0	0	0	0	0	0	0.07	0.121244	0	0	0	0	0	0	0	0	0	0	-2.74622	NA	-2.81678	NA	NA	NA	NA	NA	-0.921503	NA	NA	NA	NA	NA	NA	NA	-1.68452	NA
FBgn0038013	CG10038	84.11	73.41	71.88	38.76	43.24	42.86	42.8	40.67	45.1	52.52	53.57	48.38	70.31	65.76	63.05	58.23	54.1	62.7	76.4667	6.66338	41.62	2.48411	42.8567	2.21554	51.49	2.74403	66.3733	3.66866	58.3433	4.30112	-0.385517	0.0126724	-0.494789	0.000553793	-0.143818	0.310036	0.0286069	0.832399	-0.505856	0.000372434	-0.325686	0.000145719	-0.0541856	0.628236	-0.0771304	0.492824	-0.563731	1.90205e-05
FBgn0038014	CG10041	19.04	22.83	30.19	0.64	0.39	0.19	0.53	0.36	0.11	0	0	0.19	0	0.14	0.29	0	0	0.07	24.02	5.66945	0.406667	0.225462	0.333333	0.211266	0.0633333	0.109697	0.143333	0.145029	0.0233333	0.0404145	-5.41462	3.09693e-55	-5.86203	1.66242e-56	-0.471415	0.757582	-3.32659	0.073029	-8.86416	5.3733e-13	-2.19065	0.416735	-0.764189	0.874894	-4.14251	0.0177047	-9.63214	3.74834e-15
FBgn0038016	MBD-R2	90.41	86.52	87.9	47.19	46.07	40.09	51.39	49	46.17	55.44	56.78	51.98	75.35	75.47	79.6	91.78	90.03	91.08	88.2767	1.97216	44.45	3.81717	48.8533	2.61309	54.7333	2.4768	76.8067	2.41984	90.9633	0.880814	-0.497027	1.08711e-05	-0.510489	5.53147e-07	-0.0462992	0.747769	0.0230535	0.816508	-0.622927	1.0709e-10	0.0987628	0.023006	0.495032	5.53751e-22	0.46801	1.24513e-10	-0.1297	0.112243
FBgn0038017	CG4115	0.95	0.49	1.01	9.49	56.74	19.33	47.12	21.68	31.47	0.42	0.36	0.48	0.07	0.27	0.1	0	0	0	0.816667	0.284488	28.52	24.9296	33.4233	12.832	0.42	0.06	0.146667	0.107858	0	0	5.59334	6.02657e-12	5.66652	4.02655e-63	0.0505874	0.974703	-6.3601	3.13103e-12	-0.924447	0.261167	-3.48739	0.133947	-5.0759	0.00809502	-11.4776	4.53071e-12	-5.98938	5.77884e-05
FBgn0038018	Tim17a1	0.3	0.65	0.78	0.61	0.78	0.7	0.6	0.54	0.75	0.93	0.4	0.81	0.09	0.14	0.19	0.09	0.32	0.07	0.576667	0.248261	0.696667	0.085049	0.63	0.108167	0.713333	0.277909	0.14	0.05	0.16	0.138924	0.783109	0.291534	0.487724	0.518602	-0.329541	0.717456	-0.27791	0.766944	0.35528	0.686532	-0.142245	0.939703	-2.55742	0.0547028	-2.90119	0.00915285	-2.21274	0.0612052
FBgn0042206	GstD10	22.26	11.68	24.19	1.41	1.78	1.36	1.8	1.45	1.28	0.99	1.58	1.45	0.86	0.96	1.06	0.19	0.34	0.54	19.3767	6.735	1.51667	0.22942	1.51	0.265141	1.34	0.31	0.96	0.1	0.356667	0.175594	-3.18072	2.431e-21	-3.346	9.68778e-24	-0.197828	0.767786	-0.464293	0.476194	-3.79775	4.68889e-18	-1.54196	0.0600208	-2.11611	0.0224646	-2.62426	0.000412982	-5.89778	6.19451e-25
FBgn0038020	GstD9	122.19	65.25	112.71	37.13	35.4	34.44	24.57	18.6	22.18	39.45	39.7	47.99	37.17	37.32	37.08	30.76	22.34	24.52	100.05	30.5082	35.6567	1.36324	21.7833	3.0047	42.38	4.86001	37.19	0.121244	25.8733	4.3701	-0.999971	3.22243e-05	-1.86275	2.74131e-14	-0.896397	1.26679e-10	-0.0402175	0.806447	-1.18444	2.30761e-06	-0.658143	1.35936e-06	-0.934555	1.04536e-07	-1.02126	2.47025e-11	-2.12861	5.11599e-16
FBgn0001149	GstD1	298.85	234.14	296.81	549.26	567.84	508.73	476.58	480.62	465.78	1161.31	1184.5	1194.94	1869.78	1717.37	1770.15	1774.97	1965.32	1802.11	276.6	36.7856	541.943	30.2266	474.327	7.67232	1180.25	17.2131	1785.77	77.3958	1847.47	102.962	1.46268	2.15363e-26	1.12094	7.22663e-17	-0.375261	2.42647e-08	0.84315	4.10258e-50	2.15659	2.52815e-62	-0.0957753	0.137537	0.412437	4.02958e-12	1.20422	1.24166e-65	2.56533	3.08167e-82
FBgn0010038	GstD2	32.55	20.11	36.84	1.4	1.36	1.68	8.23	8.57	5.32	4.66	5	8.83	3.26	3.61	3.52	0.67	0.41	0.91	29.8333	8.68956	1.48	0.174356	7.37333	1.78635	6.16333	2.31565	3.46333	0.181751	0.663333	0.250067	-3.83954	1.64348e-36	-1.67533	6.91726e-09	2.1318	4.11834e-10	1.75256	7.32506e-05	-2.24732	2.3313e-11	-2.44404	3.42486e-06	-3.36024	1.35179e-08	-1.66446	0.0167286	-5.57413	6.35191e-34
FBgn0010039	GstD3	52.44	48.87	65.29	47.59	53.47	55.67	78.51	81.98	81.43	256.2	282.61	271.86	65.2	66.08	64.59	33.84	29.63	35.92	55.5333	8.63601	52.2433	4.17734	80.64	1.86502	270.223	13.2809	65.29	0.749066	33.13	3.20454	0.413499	0.0106934	0.88676	5.06588e-11	0.439639	0.00032635	2.08724	1.84943e-99	2.35006	6.35216e-78	-1.10887	4.26782e-29	-3.24649	5.31958e-297	-1.21702	1.55453e-19	-0.910271	1.7551e-08
FBgn0010040	GstD4	11.03	6.7	9.15	0.5	0.62	0.92	0.54	1.01	0.44	1.85	0.87	1.28	0.65	0.49	0.27	0.23	0.42	0.74	8.96	2.17124	0.68	0.216333	0.663333	0.304357	1.33333	0.492172	0.47	0.190788	0.463333	0.257747	-3.21519	3.1184e-14	-3.42625	3.73354e-15	-0.2412	0.849841	0.674911	0.436082	-2.70003	2.741e-08	-0.150066	0.902373	-1.74318	0.0856282	-1.11898	0.266951	-4.40691	1.34832e-14
FBgn0010041	GstD5	11.93	10.63	11.36	0.7	0.75	0.69	2.93	1.71	3.35	1.15	1.35	1.74	0.2	0.52	0.56	0.19	0	0.39	11.3067	0.651639	0.713333	0.0321455	2.66333	0.8519	1.41333	0.300056	0.426667	0.197315	0.193333	0.195021	-3.49149	1.07701e-29	-1.74311	8.53515e-09	1.7135	0.000451514	0.686393	0.340978	-2.97183	3.36049e-15	-1.11896	0.393903	-2.89676	0.00547761	-2.26522	0.0336914	-5.74911	9.68898e-21
FBgn0010042	GstD6	6.08	6.7	5.74	0.08	0.72	0.1	0.17	0.19	0.17	0.16	0.27	0.24	0.16	0.23	0.2	0.31	0.19	0.08	6.17333	0.486758	0.3	0.363868	0.176667	0.011547	0.223333	0.0568624	0.196667	0.0351188	0.193333	0.115036	-3.82311	1.33009e-08	-4.80977	9.01207e-21	-0.994636	0.600124	-0.73928	0.684226	-4.74316	8.18194e-09	-0.177693	0.916909	-0.414136	0.83357	-1.20319	0.460193	-5.20617	1.69415e-12
FBgn0010043	GstD7	4	3.53	3.26	0.39	0.16	0.53	0.17	0.31	0.21	0.32	0.41	1.71	0.06	0.06	0.1	0.22	0.2	0.18	3.59667	0.374477	0.36	0.186815	0.23	0.072111	0.813333	0.777839	0.0733333	0.023094	0.2	0.02	-2.8388	1.45052e-06	-3.62558	6.5419e-11	-0.832917	0.578944	0.820509	0.508956	-2.23443	0.000889845	1.26614	0.488427	-2.23683	0.109392	-1.45557	0.288249	-4.38749	2.46e-08
FBgn0010044	GstD8	1.06	1.04	1.11	0.08	0	0.13	0	0	0.06	0	0.13	0.23	0.16	0.16	0.1	0	0	0	1.07	0.0360555	0.07	0.0655744	0.02	0.034641	0.12	0.115326	0.14	0.034641	0	0	-3.44205	0.00164608	-5.17058	0.000142355	-1.87369	NA	0.381906	NA	-3.24847	0.0136429	-2.87358	0.275537	-2.69963	0.525269	-2.3411	0.585483	-5.84244	5.83557e-05
FBgn0038028	CG10035	0.08	0.15	0.08	0.03	0.05	0.03	0	0	0	0	0.11	0.1	0.05	0.04	0.16	0	0	0	0.103333	0.0404145	0.0366667	0.011547	0	0	0.07	0.0608276	0.0833333	0.0665833	0	0	-0.983899	0.580218	-4.43033	0.0891639	-3.46102	NA	0.581501	NA	-0.566184	0.77365	-2.94739	0.286431	-2.7476	0.519091	-2.19235	0.546598	-3.29511	0.181588
FBgn0038029	GstD11	0.33	0.12	0.16	0.04	0.06	0	0.11	0	0.02	0	0	0	0	0.04	0	0	0	0	0.203333	0.111505	0.0333333	0.0305505	0.0433333	0.0585947	0	0	0.0133333	0.023094	0	0	-2.26014	0.244127	-1.90952	0.296304	0.350989	NA	-0.567056	NA	-2.96536	NA	0.0819112	NA	NA	NA	-1.3819	NA	-3.7275	0.0947918
FBgn0085431	CG34402	1.29	1.06	0.99	0.05	0	0.09	0.17	0.15	0.18	0.12	0	0	0	0	0.04	0	0	0	1.11333	0.15695	0.0466667	0.0450925	0.166667	0.0152753	0.04	0.069282	0.0133333	0.023094	0	0	-4.14935	4.34415e-07	-2.40258	1.27252e-06	1.68657	0.299333	-0.476609	0.879928	-4.73207	6.45425e-05	-0.863061	NA	-2.63296	0.57877	-3.16885	0.377145	-7.36766	1.80131e-08
FBgn0053098	CG33098	0	0.16	0.09	0.35	0.09	0.11	0.47	0.46	0.61	0	0	0	0.09	0	0	0	0	0	0.0833333	0.0802081	0.183333	0.144684	0.513333	0.083865	0	0	0.03	0.0519615	0	0	1.6739	0.333006	3.07774	0.00776724	1.38301	0.204923	-3.23941	0.199634	-1.73805	NA	-1.0801	NA	NA	NA	-4.05743	0.0775694	-2.51164	0.514375
FBgn0038032	CG10096	1.18	0.98	1.37	0.11	0.04	0.06	0.16	0.2	0.08	0	0	0	0.04	0.02	0	0	0	0	1.17667	0.195021	0.07	0.0360555	0.146667	0.061101	0	0	0.02	0.02	0	0	-3.62189	6.15819e-11	-2.71469	7.2063e-09	0.889857	0.48468	-3.71944	0.109702	-7.4623	5.94386e-09	-2.46195	NA	NA	NA	-4.56577	0.0312662	-8.26139	7.45739e-11
FBgn0038033	CG10097	0.52	0.6	0.57	0.58	0.05	0.85	0.53	3.07	1.5	0.07	0	0	0.25	0.14	0.04	0	0	0	0.563333	0.0404145	0.493333	0.406981	1.7	1.28176	0.0233333	0.0404145	0.143333	0.10504	0	0	0.340188	0.699933	1.95738	0.000557251	1.58387	0.12372	-5.3554	0.000935485	-5.18295	6.59641e-05	-5.36287	0.0034449	-2.26738	0.634714	-7.58269	2.38986e-06	-7.34072	1.50808e-08
FBgn0038034	Cyp9f3	13.86	15.98	21.28	2.96	1.98	2.37	4.67	4.37	3.71	1.79	2.6	1.76	1.52	1.16	1.4	0.85	0.55	0.79	17.04	3.82188	2.43667	0.49339	4.25	0.491121	2.05	0.47655	1.36	0.183303	0.73	0.158745	-2.30491	1.11788e-25	-1.65165	4.53052e-19	0.623189	0.0161652	-0.511462	0.159144	-2.95718	6.67737e-33	-0.991781	0.0103867	-1.69112	0.000104293	-2.25485	9.89593e-10	-4.65244	1.52545e-62
FBgn0286075	DNAlig3	19.71	19.59	26.17	17.37	16.72	16.78	26.22	24.22	22.84	16.92	14.8	14.02	15.77	16.78	16.97	21.56	19.48	20.1	21.8233	3.7648	16.9567	0.359212	24.4267	1.69945	15.2467	1.50071	16.5067	0.645006	20.38	1.0679	0.137883	0.374894	0.511718	0.000244817	0.341496	0.00101252	-0.429318	0.000662379	-0.443249	0.00680324	0.160565	0.0751754	0.180158	0.162973	-0.30038	0.00217965	-0.268182	0.0732722
FBgn0038037	Cyp9f2	25.9	23.77	28.87	16.56	11.95	11.01	23.86	23.51	27.42	5.53	4.3	3.88	12.78	12.06	12.52	0.14	0.32	0.68	26.18	2.5615	13.1733	2.97036	24.93	2.16349	4.57	0.857496	12.4533	0.3646	0.38	0.274955	-0.496704	0.0107541	0.276123	0.0546226	0.740973	3.31592e-05	-1.7943	2.40397e-14	-2.43768	1.49027e-37	-5.11372	7.3738e-55	-3.80903	6.03479e-14	-5.63731	1.36743e-47	-6.21941	1.05938e-73
FBgn0038038	CG5167	21.51	22.15	21.38	52.56	42.55	40.68	44.32	49.2	42.71	28.13	29.84	21.84	14.61	16.78	16.47	12.4	15.16	13.88	21.68	0.412189	45.2633	6.3879	45.41	3.37951	26.6033	4.21284	15.9533	1.17364	13.8133	1.38121	1.55659	9.90053e-28	1.41247	3.98876e-32	-0.176356	0.297391	-1.03778	4.33e-12	0.370255	0.017926	-0.362715	0.00730766	-1.19302	9.85526e-14	-2.28523	1.05589e-57	-0.830556	4.17612e-10
FBgn0038039	CG5196	55.62	57.62	55.31	44.72	44.64	41.1	48.51	48.92	51.72	73.69	75.27	74.05	74.93	71.48	73.21	85.53	95.43	89.93	56.1833	1.25381	43.4867	2.0673	49.7167	1.74701	74.3367	0.82809	73.2067	1.725	90.2967	4.96017	0.125481	0.278064	0.169352	0.127426	0.0104701	0.94513	0.494199	4.62035e-10	0.471125	2.49754e-07	0.154058	0.0232452	0.0436688	0.616795	0.486552	4.26379e-09	0.511491	1.66039e-08
FBgn0000455	Dip-C	81.45	73.73	74.83	43.72	42.74	36.88	50.56	47.31	44.02	39.09	37.61	30.46	27.86	27.42	28.89	35.59	36.43	38.31	76.67	4.17598	41.1133	3.69877	47.2967	3.27002	35.72	4.61501	28.0567	0.754476	36.7767	1.39274	-0.408238	0.00218758	-0.355731	0.0047413	0.0195776	0.916072	-0.474719	0.00014986	-1.03271	3.54806e-13	0.245711	0.00135316	-0.199323	0.103272	-0.72545	2.9452e-14	-1.23393	3.1725e-30
FBgn0082831	pps	49.05	44.69	48.96	36.43	34.79	33.27	41.42	40.56	38.59	66.14	67.88	61.55	64.35	65.86	66.91	82.61	77.36	81.8	47.5667	2.49167	34.83	1.58038	40.19	1.45083	65.19	3.27018	65.7067	1.28687	80.59	2.82643	0.0448075	0.722245	0.100495	0.376857	0.0228204	0.860259	0.625362	2.51552e-18	0.520607	3.77425e-07	0.150365	0.000229882	0.0698074	0.180857	0.644315	1.51458e-26	0.587404	3.98605e-11
FBgn0038042	Scgbeta	20.27	14.25	15.39	2.05	2.24	1.59	3.1	2.34	3.03	0.1	0.25	0.15	0.21	0.11	0.06	0.07	0	0.05	16.6367	3.19777	1.96	0.334215	2.82333	0.42004	0.166667	0.0763763	0.126667	0.0763763	0.04	0.0360555	-2.6035	8.04609e-24	-2.22435	8.75431e-20	0.344654	0.390584	-3.78841	7.14642e-06	-6.5312	3.27212e-20	-1.60549	0.415487	-2.12502	0.333194	-5.95451	1.34051e-07	-8.65074	1.46294e-16
FBgn0038043	CG17202	183.81	167.72	163.81	207.85	222.13	193.03	206.5	201.99	174.09	159.52	183.05	181.23	332.6	304.08	310.72	313.78	321.29	344.49	171.78	10.6001	207.67	14.5508	194.193	17.5554	174.6	13.0913	315.8	14.9232	326.52	16.0091	0.764444	1.31298e-09	0.517665	9.89292e-05	-0.280002	0.0122851	-0.531268	4.73509e-10	0.0854882	0.509406	-0.0962684	0.135636	0.670989	2.0629e-19	0.0878228	0.260599	0.752257	1.41711e-12
FBgn0004103	Pp1-87B	725.51	769.54	700.52	299.59	329.79	296.52	360.33	359.49	339.84	280.23	312.63	280.74	311.73	291.76	297.27	281.96	255.24	278.71	731.857	34.945	308.633	18.3864	353.22	11.595	291.2	18.5607	300.253	10.3138	271.97	14.5794	-0.75129	5.46633e-13	-0.706773	4.35186e-13	0.0110813	0.936535	-0.363588	2.7201e-07	-1.26325	1.13445e-43	-0.286785	3.50905e-09	-0.333102	2.08215e-10	-0.747891	4.87466e-34	-1.59978	2.55969e-92
FBgn0038045	NANS	17.69	23.58	17.64	0.64	0.38	0.35	1.34	1.15	1.28	0.4	0	0.3	0.24	0.14	0.1	0.26	0	0.11	19.6367	3.41512	0.456667	0.159478	1.25667	0.0971253	0.233333	0.208167	0.16	0.072111	0.123333	0.130512	-4.96716	1.80252e-62	-3.6271	1.91519e-58	1.29496	0.016275	-1.3064	0.30119	-6.47741	2.78579e-24	-0.414103	0.797421	-1.05584	0.600777	-2.32467	0.042159	-7.30222	1.32371e-30
FBgn0038046	CG5641	114.46	113.14	106.03	92.83	106.14	80.06	108.16	101.43	92.73	71.73	83.67	78.94	140.86	129.49	135.16	145.66	152.86	147.78	111.21	4.5343	93.01	13.0409	100.773	7.73593	78.1133	6.01277	135.17	5.68501	148.767	3.70002	0.232422	0.106294	0.199894	0.108249	-0.0659263	0.72895	-0.529635	1.76816e-06	-0.44515	8.46064e-05	-0.00903964	0.898668	0.694189	6.35575e-20	0.113693	0.289788	0.246205	0.00877596
FBgn0038047	CG5245	28	31.15	25.63	2.57	2.82	2.2	2.34	1.44	2.18	8.64	6.46	8.39	16.1	18.04	17.13	15.68	13.06	15.74	28.26	2.76917	2.53	0.311929	1.98667	0.480139	7.83	1.19302	17.09	0.970618	14.8267	1.53027	-2.9868	4.72706e-66	-3.49151	2.8311e-65	-0.537382	0.115908	1.34497	2.976e-08	-1.79345	9.7908e-23	-0.339489	0.00580324	0.699181	0.000423691	1.98924	1.24216e-28	-1.0944	8.6213e-15
FBgn0086134	Prosalpha2	489.91	492.94	469.27	303.62	333.37	296.88	356.33	359.16	321.62	314.28	303.1	285.04	516.01	504.19	506.3	559.33	629.13	558.36	484.04	12.8806	311.29	19.4165	345.703	20.9047	300.807	14.7543	508.833	6.30408	582.273	40.582	-0.143182	0.211951	-0.14202	0.213694	-0.0321817	0.831635	-0.327376	2.58848e-05	-0.619142	2.16474e-10	0.0482169	0.5057	0.716891	1.86335e-21	0.337647	3.6036e-05	0.0942508	0.358709
FBgn0029512	Aos1	262.81	291.85	253.67	133.14	155.13	119.34	146.6	144.75	131.58	170.27	171.85	157.7	264.7	240.03	262.39	264.98	292.49	271.39	269.443	19.9356	135.87	18.0505	140.977	8.19015	166.607	7.75375	255.707	13.6254	276.287	14.3939	-0.49527	0.000174023	-0.590146	1.37853e-07	-0.128369	0.395777	0.0180481	0.880548	-0.624937	1.0358e-09	-0.0348587	0.634584	0.492108	4.01511e-12	0.460083	3.37346e-06	-0.135134	0.180548
FBgn0038049	CG5844	125.64	133.09	130.84	81.58	98.97	85.16	88.09	92.29	87.18	74.27	75.64	78.52	70.32	68.74	68.32	92.91	91.98	87.86	129.857	3.8211	88.57	9.18282	89.1867	2.72581	76.1433	2.16925	69.1267	1.05458	90.9167	2.68768	-0.0560293	0.661492	-0.195543	0.043343	-0.173528	0.172014	-0.499292	3.46863e-07	-0.704109	9.50364e-17	0.247507	8.3042e-05	0.0217248	0.809203	-0.52889	8.41982e-09	-0.686944	1.07351e-20
FBgn0043043	Desat2	5.11	6.01	6.09	0.14	0.28	0.04	0.36	0.53	0.39	0	0.15	0.39	0.06	0.06	0	0	0	0	5.73667	0.544181	0.153333	0.120554	0.426667	0.0907377	0.18	0.196723	0.04	0.034641	0	0	-4.7075	1.24334e-22	-3.39197	3.47927e-27	1.30516	0.246566	-0.127742	0.945709	-5.15638	7.069e-13	-1.93171	NA	-4.12106	0.16399	-4.24247	0.0620955	-9.09172	1.60373e-13
FBgn0038051	CG17207	4.41	5.04	4.83	0.12	0.12	0.08	0.23	0.15	0.25	0	0	0	0.09	0.03	0	0	0	0.05	4.76	0.32078	0.106667	0.023094	0.21	0.052915	0	0	0.04	0.0458258	0.0166667	0.0288675	-5.00786	2.1021e-25	-4.15805	1.91471e-26	0.813389	0.562787	-2.84826	NA	-8.00492	1.44779e-10	-0.951541	NA	0.186918	NA	-2.71316	0.21787	-7.82213	2.84949e-10
FBgn0086687	Desat1	118.33	171.98	186.94	299.21	284.02	368.39	310.1	318.59	385	424.64	419.94	475.37	441.09	429.84	447.27	361.85	343.19	374.84	159.083	36.0774	317.207	44.972	337.897	41.013	439.983	30.7357	439.4	8.83704	359.96	15.9094	1.50904	1.3685e-17	1.44459	1.26865e-18	-0.0977289	0.677777	0.186263	0.152829	1.5449	2.73204e-25	-0.431461	1.77069e-30	-0.523893	7.86862e-17	-0.38877	0.00100223	1.01439	1.7676e-11
FBgn0038052	CG5538	2.9	2.82	2.98	0.09	0.22	0.12	0.12	0.13	0.15	0.18	0.08	0	0.12	0.1	0.09	0	0.1	0.05	2.9	0.08	0.143333	0.0680686	0.133333	0.0152753	0.0866667	0.090185	0.103333	0.0152753	0.05	0.05	-3.80844	5.33614e-14	-4.11238	2.25847e-17	-0.321605	0.858313	-0.968568	0.608666	-4.90482	2.14025e-07	-1.35368	0.488903	-1.17538	0.665937	-2.27449	0.206336	-6.27952	6.2475e-09
FBgn0038053	CG18549	17.92	20.47	22.6	29.25	28.3	29.36	26.73	27.05	29.53	44.06	44.34	43.06	60.04	59.08	59	71.39	73.85	75.08	20.33	2.34314	28.97	0.582838	27.77	1.53258	43.82	0.672904	59.3733	0.578734	73.44	1.87886	1.01334	7.28915e-18	0.801041	1.31639e-11	-0.245325	0.0274437	0.316521	0.000956044	1.17954	5.20757e-28	0.16065	0.00460799	0.508837	1.22875e-12	0.77421	1.68696e-22	1.68363	1.93608e-65
FBgn0038054	CG5509	2.85	2.09	3.83	0.54	0.32	0.69	0.35	0.32	0.76	0.17	0.29	0	0.23	0.06	0.05	0	0	0	2.92333	0.872315	0.516667	0.1861	0.476667	0.245832	0.153333	0.145717	0.113333	0.10116	0	0	-1.9949	0.000666456	-2.25622	0.000128628	-0.305448	0.830027	-1.93063	0.215151	-4.01389	0.000122633	-2.44851	NA	-2.94863	0.463494	-5.04261	0.00512074	-7.13558	9.78877e-08
FBgn0038055	trus	76.04	72.91	73.24	29.52	35.98	27.77	31.34	33.28	27.92	39.18	41.53	43.13	45.3	45.13	45.97	59.74	59.06	60.65	74.0633	1.71978	31.09	4.32431	30.8467	2.71384	41.28	1.98683	45.4667	0.44411	59.8167	0.797768	-0.760652	1.5087e-08	-0.920198	4.12437e-14	-0.193257	0.254844	0.128794	0.322897	-0.78032	2.47963e-13	0.250582	2.4671e-05	0.304311	0.000216599	0.379756	0.000401897	-0.481298	4.84524e-08
FBgn0038056	CG5961	44.06	50.63	48.52	47.83	51.3	42.33	42.74	40.21	35.51	31.39	29.73	34.3	35.49	35.72	39.1	27.4	25.38	31.35	47.7367	3.35432	47.1533	4.52312	39.4867	3.66887	31.8067	2.31332	36.77	2.02111	28.0433	3.03655	0.479104	2.31916e-05	0.0728957	0.572018	-0.438916	0.000192243	-0.852209	7.97968e-15	-0.521697	3.47069e-06	-0.52714	3.06821e-08	-0.406412	0.00143442	-1.30855	1.43441e-32	-0.930758	5.53799e-17
FBgn0038057	CG12267	61.61	74.97	72.76	43.35	41.76	36.92	39.43	38.78	33	24.43	26.23	24.14	21.98	21.37	22.77	23.61	21.7	23.79	69.78	7.16119	40.6767	3.34909	37.07	3.53968	24.9333	1.13227	22.04	0.701926	23.0333	1.1582	-0.279457	0.0175584	-0.563889	2.84648e-06	-0.316617	0.0113604	-0.982024	2.26416e-19	-1.41057	5.36859e-38	-0.0764294	0.456287	-0.348058	0.00274341	-1.38196	1.89139e-42	-1.76338	2.53123e-67
FBgn0038058	CG5608	22.17	28.34	26	15.07	12.89	12.69	15.62	15.64	13.8	23.41	26.17	25.17	33.67	33.14	34	45.55	41.99	44.58	25.5033	3.11484	13.55	1.32015	15.02	1.0566	24.9167	1.39733	33.6033	0.433859	44.04	1.84041	-0.412584	0.00424368	-0.414495	0.00161028	-0.0336933	0.880729	0.599806	1.09716e-06	0.0381764	0.770072	0.247834	7.72762e-05	0.589084	6.9269e-12	1.13664	1.23333e-27	0.621932	2.83187e-09
FBgn0013277	Hsp70Ba	0	0	0.16	21.9	9.04	6.06	7.44	4.75	0	0	0.18	0	0.43	7.25	4.38	0	0	0	0.0533333	0.092376	12.3333	8.41789	4.06333	3.76723	0.06	0.103923	4.02	3.42422	0	0	8.43955	2.53152e-06	6.70463	0.0866722	-1.7776	0.57871	-7.88866	4.81005e-10	0.267487	0.932363	-9.3826	8.89058e-06	-3.30501	0.468944	-11.4131	8.04076e-15	-3.08358	0.474277
FBgn0051354	Hsp70Bbb	17.28	20.05	19.56	26.53	6.03	3.04	10.99	4.95	1.05	0.47	0	0.53	0	0	3.53	0.26	0.14	0	18.9633	1.47825	11.8667	12.7865	5.66333	5.00825	0.333333	0.29023	1.17667	2.03805	0.133333	0.130128	-0.186441	0.86014	-1.4074	0.126887	-1.24041	0.485673	-5.44026	0.000506615	-5.79335	3.84037e-08	-3.38422	NA	-1.67644	0.333374	-7.16826	1.9451e-06	-7.47591	3.1244e-19
FBgn0013278	Hsp70Bb	43.22	38.3	67.41	50.85	13.84	14.64	32.38	17.92	1.18	0	0.69	0	1.26	12.37	8.71	0.55	0.41	0.78	49.6433	15.5818	26.4433	21.1406	17.16	15.6139	0.23	0.398372	7.44667	5.66172	0.58	0.186815	-0.406285	0.58905	-1.18953	0.335614	-0.803668	0.696638	-7.08134	0.000565636	-7.63643	4.76225e-05	-3.79479	7.54046e-05	1.05741	0.455848	-6.03541	6.2001e-17	-6.50383	6.90263e-100
FBgn0013279	Hsp70Bc	26.93	24.45	39.96	3.37	0.9	1.62	2.92	2.81	0.06	0	0	0.5	0.07	0.28	1.16	0.16	0	0.54	30.4467	8.33158	1.96333	1.27029	1.93	1.6204	0.166667	0.288675	0.503333	0.578302	0.233333	0.277369	-3.45053	3.90759e-09	-3.6333	0.00496278	-0.206906	0.936255	-3.89174	0.0612177	-7.50031	4.78663e-05	-1.17888	0.353135	0.308337	0.89215	-3.53353	3.99814e-06	-7.13117	5.09108e-12
FBgn0250910	Octbeta3R	0.34	0.5	0.49	0.02	0.01	0.01	0.02	0.02	0.03	0.02	0.03	0.03	0	0.01	0.02	0.09	0.09	0.04	0.443333	0.0896289	0.0133333	0.0057735	0.0233333	0.0057735	0.0266667	0.0057735	0.01	0.01	0.0733333	0.0288675	-4.49723	3.73421e-10	-3.83723	1.44533e-09	0.617109	0.789689	0.574174	0.785396	-4.0949	3.44605e-05	2.49723	0.07218	1.25585	0.431824	1.76892	0.159661	-2.88199	3.58575e-07
FBgn0028374	Hug	0.04	0	0.07	0	0	0	0	0	0	0	0	0	0	0	0	0	0	0	0.0366667	0.0351188	0	0	0	0	0	0	0	0	0	0	-2.4293	NA	-2.49646	NA	NA	NA	NA	NA	-0.594041	NA	NA	NA	NA	NA	NA	NA	-1.36848	NA
FBgn0038063	Octbeta2R	0.05	0.01	0.08	1.06	0.83	0.97	1.36	1.84	1.72	2.61	2.55	2.71	2.48	2.24	2.13	0	0	0	0.0466667	0.0351188	0.953333	0.115902	1.64	0.2498	2.62333	0.080829	2.28333	0.178979	0	0	4.91922	1.59447e-20	5.55319	1.51631e-31	0.602071	0.017373	1.17936	1.38463e-07	5.94783	3.26546e-40	-9.37553	4.49046e-14	-9.66558	5.58072e-15	-8.54018	1.04356e-11	-3.75046	0.108866
FBgn0005671	Vha55	78.38	99.78	104.14	511.39	439.7	473.15	398.31	414.7	410.56	446.92	461.15	437.97	452.14	481.17	469.22	462.84	501.79	483.48	94.1	13.7874	474.747	35.8717	407.857	8.52285	448.68	11.6898	467.51	14.5903	482.703	19.4866	2.83993	2.94478e-120	2.46856	6.99612e-118	-0.403626	1.82106e-05	-0.363207	1.04231e-05	2.32692	3.30153e-118	-0.0992798	0.0782066	-0.129298	0.0156793	-0.543641	1.99478e-10	2.19281	3.24201e-93
FBgn0038065	Snx3	159.28	156.07	148.92	96.81	110.55	99.84	117.13	123.99	119.76	146.74	151.84	141.9	163.19	147.65	153.45	165.99	163.53	173.99	154.757	5.3034	102.4	7.21887	120.293	3.46096	146.827	4.97057	154.763	7.8528	167.837	5.46905	-0.10235	0.428306	-0.019676	0.879312	0.0485598	0.737322	0.240729	0.00362863	-0.00997064	0.928088	-0.0270866	0.679455	-0.0428092	0.496525	0.146964	0.0501612	-0.0556757	0.543041
FBgn0260444	Not10	32.66	31.49	32.92	37.34	33.11	32.89	31.93	31.27	29.17	24.34	28.9	30.46	37.41	38.15	39.27	41.29	48.53	45.42	32.3567	0.76173	34.4467	2.50811	30.79	1.44125	27.9	3.18019	38.2767	0.936447	45.08	3.63196	0.585222	1.33183e-06	0.272344	0.0139639	-0.345233	0.000894121	-0.588961	5.99318e-07	-0.152387	0.242792	0.0862021	0.332637	0.460542	0.000133148	-0.180412	0.109065	0.303438	0.00644395
FBgn0042207	CG18530	10.88	17.39	13.68	0.78	0.7	0.38	0.91	0.89	0.72	0.39	0.74	1.64	0.62	0.64	0.67	0.07	0.23	0.22	13.9833	3.26558	0.62	0.21166	0.84	0.104403	0.923333	0.644851	0.643333	0.0251661	0.173333	0.0896289	-3.99447	1.37581e-37	-3.6987	1.02666e-42	0.264024	0.754147	0.257553	0.770526	-3.94491	5.0247e-22	-2.10984	0.0193416	-2.68773	0.0136915	-2.46771	0.0106393	-6.5707	3.84754e-27
FBgn0038067	CG11598	19.9	15.21	20.87	0.25	0.13	0.39	0.9	0.83	0.77	0.09	0.08	0.14	0.07	0.03	0.09	0	0	0.05	18.66	3.0269	0.256667	0.130128	0.833333	0.0650641	0.103333	0.0321455	0.0633333	0.0305505	0.0166667	0.0288675	-5.70386	2.89448e-57	-4.15268	5.60631e-65	1.50483	0.0402336	-1.62688	0.29452	-7.48862	1.71312e-17	-1.4792	0.580249	-2.27384	0.417996	-3.92619	0.0299525	-9.70853	2.0898e-15
FBgn0038068	CG11600	5.45	7.65	6.79	0.05	0	0	0.05	0.08	0.17	0	0.08	0	0	0	0	0	0	0	6.63	1.10869	0.0166667	0.0288675	0.1	0.06245	0.0266667	0.046188	0	0	0	0	-8.47727	5.71987e-15	-5.64904	2.71938e-32	2.61646	0.34115	0.873878	NA	-7.52444	1.45857e-09	NA	NA	-1.73681	NA	-0.921132	NA	-9.26592	5.97579e-14
FBgn0038069	CG11608	0.64	0.45	0.63	0	0	0	0	0	0.05	0	0	0	0	0	0	0	0	0	0.573333	0.106927	0	0	0.0166667	0.0288675	0	0	0	0	0	0	-6.86483	1.0419e-05	-4.53568	0.000367275	2.21043	NA	NA	NA	-5.02137	0.0010775	NA	NA	NA	NA	NA	NA	-5.80179	8.83528e-05
FBgn0038070	CG6753	0.04	0.13	0.1	0.8	0.89	0.68	3.02	1.96	2.32	0.52	0.22	0.29	0.02	0.16	0.04	0	0	0	0.09	0.0458258	0.79	0.105357	2.43333	0.539011	0.343333	0.15695	0.0733333	0.0757188	0	0	3.62579	1.03741e-07	5.09739	1.82774e-20	1.43331	9.59377e-06	-1.47383	0.0371046	1.9984	0.0500754	-3.25135	0.207606	-5.51759	0.00208115	-7.0421	2.17216e-07	-3.53437	0.126106
FBgn0038071	Dtg	4.7	3.52	5.05	0.32	0.7	0.43	0.84	0.56	0.63	0.73	0.36	0.84	0.02	0.03	0.01	0	0	0	4.42333	0.801644	0.483333	0.195533	0.676667	0.145717	0.643333	0.251462	0.02	0.01	0	0	-2.68943	1.28911e-15	-2.37451	8.48188e-18	0.287119	0.688674	0.102723	0.887303	-2.77412	3.26714e-13	-1.91744	NA	-6.89859	2.63453e-06	-6.83006	1.41693e-06	-9.63541	6.17681e-15
FBgn0038072	CG6225	0.73	0.36	0.99	2.89	3.57	2.45	5.48	3.5	4.28	0.12	0.14	0.25	0.16	0.16	0.11	0	0	0	0.693333	0.316596	2.97	0.564269	4.42	0.997397	0.17	0.07	0.143333	0.0288675	0	0	2.57912	3.39592e-13	3.00136	7.57941e-19	0.388744	0.168721	-4.46553	3.73635e-17	-2.0055	0.00736217	-4.87703	0.00366509	-5.20634	0.00615455	-9.65941	4.76035e-15	-7.17766	2.18851e-07
FBgn0038073	CG14395	0.09	0.06	0.06	0.01	0.02	0.02	0.03	0.04	0.05	0	0.05	0	0.01	0	0	0	0	0	0.07	0.0173205	0.0166667	0.0057735	0.04	0.01	0.0166667	0.0288675	0.00333333	0.0057735	0	0	-1.41975	0.285553	-0.469584	0.672252	0.910213	0.639766	-0.305153	NA	-1.83624	0.294069	-0.0257698	NA	-2.45687	NA	-2.85091	0.361989	-4.38378	0.0197851
FBgn0038074	Gnmt	0.56	0.51	0.49	0.36	0.93	0.26	0.64	0.57	0.57	0.36	0.31	0.55	0.08	0.04	0	0	0	0	0.52	0.0360555	0.516667	0.361432	0.593333	0.0404145	0.406667	0.126623	0.04	0.04	0	0	0.513585	0.56335	0.567313	0.409327	0.0136784	0.993137	-0.659473	0.57098	-0.306698	0.7469	-1.4941	NA	-4.81889	0.0182228	-5.50582	0.00140779	-5.09924	0.0016013
FBgn0263621	CG43630	4.29	2.91	7.26	1.51	2.53	2.58	3.79	5.18	3.62	1.24	1.07	0.94	1.09	0.22	0.61	0.42	0	0	4.82	2.2229	2.20667	0.603849	4.19667	0.855823	1.08333	0.150444	0.64	0.435775	0.14	0.242487	-0.63224	0.393344	0.132577	0.843895	0.731028	0.366039	-1.30153	0.303486	-2.08702	0.0381682	-1.80034	0.456265	-2.65626	0.27536	-4.0382	0.0151451	-4.79414	0.00092071
FBgn0026207	mbo	65.5	65.15	61.02	37.68	43.23	36.76	44.19	43.3	41.01	44.52	42.51	39.7	49.94	49.58	51.16	62.64	59.4	59.59	63.89	2.49165	39.2233	3.50023	42.8333	1.64056	42.2433	2.42104	50.2267	0.82809	60.5433	1.81825	-0.211227	0.100857	-0.233757	0.0409966	-0.0564548	0.703443	-0.169654	0.100437	-0.52924	2.22056e-06	0.12425	0.024986	0.281063	0.000176408	0.0607025	0.488785	-0.250362	0.0063002
FBgn0038076	Cyp313a4	1.4	0.89	1.22	11.05	23.19	17.35	22.92	23.94	24.85	1.39	1.97	2.32	1.1	0.83	1	0	0	0	1.17	0.25865	17.1967	6.07145	23.9033	0.965522	1.89333	0.469716	0.976667	0.136504	0	0	4.3578	1.94991e-46	4.6803	5.66139e-127	0.290178	0.370768	-3.48122	1.57668e-28	0.733751	0.0869458	-6.81473	4.35831e-07	-7.85456	4.16835e-09	-11.3742	2.19881e-20	-7.11544	9.73071e-08
FBgn0001296	kar	19.85	22.44	21.12	127.05	115.61	109.01	116.92	129.07	105.21	46.67	50.27	56.18	24.65	26.47	22.83	0.21	0.18	0.14	21.1367	1.29508	117.223	9.12757	117.067	11.9307	51.04	4.80153	24.65	1.82	0.176667	0.0351188	2.96928	6.31851e-171	2.8172	6.19405e-128	-0.184223	0.175286	-1.48371	1.08128e-56	1.33758	1.18026e-34	-7.31123	2.71138e-72	-8.44908	8.40298e-97	-9.98186	1.67188e-138	-7.1126	8.63879e-68
FBgn0005355	Su(fu)	24.95	27.93	27.93	46.13	49.4	43.63	58.28	59.46	51.41	66.4	59.82	61.17	84.77	81.58	79.63	95.94	101.03	97.17	26.9367	1.7205	46.3867	2.89355	56.3833	4.34726	62.4633	3.47543	81.9933	2.59481	98.0467	2.65583	1.28234	9.67653e-36	1.41337	8.71296e-39	0.0981232	0.495159	0.150655	0.140396	1.284	7.77576e-35	0.110169	0.0906094	0.413995	4.90182e-07	0.512453	1.34459e-11	1.69296	1.25325e-95
FBgn0051347	CG31347	3.07	4.48	3.72	0.8	1.42	0.68	1.41	1.57	1.37	1.14	0.85	0.42	0.69	0.56	0.82	0.84	0.5	0.61	3.75667	0.705715	0.966667	0.397157	1.45	0.10583	0.803333	0.362261	0.69	0.13	0.65	0.173494	-1.459	0.00152385	-1.03153	0.00411219	0.392603	0.603061	-0.522122	0.559028	-2.11578	0.000110183	-0.196793	0.814944	-0.536341	0.591642	-1.11229	0.148123	-2.66748	7.77316e-08
FBgn0011745	Arp1	133.65	148.47	144	87.51	98.82	85.4	111.67	115.64	101.18	110.19	106.03	100.04	105.68	106.24	107.61	131.11	135.11	138.26	142.04	7.60193	90.5767	7.21647	109.497	7.47097	105.42	5.10242	106.51	0.992925	134.827	3.58341	-0.152188	0.154709	-0.0283328	0.807252	0.0906573	0.526839	-0.0583049	0.561548	-0.359082	6.00936e-05	0.194311	0.0001188	0.117341	0.106284	0.00810178	0.92205	-0.24548	0.000396681
FBgn0038078	CG14391	0.52	0.16	0.37	0	0	0.04	0.05	0.1	0	0	0	0	0	0	0	0	0	0	0.35	0.180831	0.0133333	0.023094	0.05	0.05	0	0	0	0	0	0	-3.94392	0.0702382	-2.50263	0.161852	1.42832	NA	1.03155	NA	-3.0611	NA	NA	NA	NA	NA	0.247614	NA	-3.79629	0.0812549
FBgn0038079	NijC	1.63	2.21	2.16	2.91	5.38	4.18	7	5.64	6.87	3.19	1.92	3.97	2.03	2.09	2.11	0	0	0	2	0.321403	4.15667	1.23517	6.50333	0.750489	3.02667	1.03471	2.07667	0.0416333	0	0	1.56761	9.47481e-05	2.05824	7.44486e-12	0.450259	0.240702	-0.78807	0.113785	0.628185	0.207136	-6.58238	1.2158e-06	-7.19418	3.20436e-07	-8.00505	7.40339e-10	-6.54571	1.63283e-06
FBgn0016693	Past1	19.68	23.35	23.79	69.6	70.27	67.97	84.63	90.84	81.11	82.31	89.06	83.3	90.29	87.91	86.89	96.48	98.37	100.77	22.2733	2.25664	69.28	1.18292	85.5267	4.92658	84.89	3.64509	88.3633	1.74474	98.54	2.15005	2.13842	2.61763e-109	2.29131	4.80835e-111	0.120124	0.267278	0.0132068	0.873166	2.00174	7.38062e-110	0.011715	0.840708	-0.0208844	0.743867	-0.0586726	0.360199	1.97706	6.29218e-122
FBgn0038080	CG12279	71.45	61.95	58.3	76.36	88.4	73.99	72.68	70.91	62.9	50.78	41.17	28.66	43.01	44.67	39.06	65.48	64.16	57.12	63.9	6.78841	79.5833	7.72686	68.83	5.21123	40.2033	11.0916	42.2467	2.88185	62.2533	4.49432	0.804833	7.36398e-07	0.445492	0.00633692	-0.393688	0.00179188	-1.24768	2.8034e-11	-0.594302	0.0112129	0.408741	0.000880088	0.381589	0.0790441	-0.924518	1.29369e-14	-0.216433	0.188931
FBgn0002905	mus308	22.77	24.82	24.06	13.63	17.52	13.13	18.27	17.47	16.51	15.88	16.64	17.51	5.51	6.28	6.41	8.38	8.49	8.04	23.8833	1.03636	14.76	2.40327	17.4167	0.881211	16.6767	0.815618	6.06667	0.48645	8.30333	0.234592	-0.199992	0.160328	-0.109872	0.274464	0.0562815	0.789526	-0.103748	0.430521	-0.452978	2.34624e-07	0.303568	0.00180926	-1.24185	4.20035e-48	-1.39586	6.46693e-32	-1.69907	1.199e-100
FBgn0002719	Men	30.08	26.69	36.58	59.09	72.94	59.53	97.59	103.52	90.16	145.72	153.54	153.45	144.31	143.97	140.02	141.07	144.68	143.08	31.1167	5.02584	63.8533	7.87236	97.09	6.69402	150.903	4.48912	142.767	2.38475	142.943	1.80888	1.53383	8.31271e-26	1.98939	1.37246e-49	0.421994	0.000447405	0.961445	1.48509e-27	2.34504	5.00596e-77	-0.14448	0.00183562	-0.312795	1.92106e-10	0.597837	8.44621e-12	2.0277	2.23193e-56
FBgn0038082	CG5724	0.11	0	0.13	0	0.07	0	0	0	0	0	0.06	0	0	0	0	0	0	0	0.08	0.07	0.0233333	0.0404145	0	0	0.02	0.034641	0	0	0	0	-1.38319	0.622447	-4.40657	0.165296	-3.04525	NA	0.0182045	NA	-1.5432	NA	NA	NA	-1.74385	NA	-1.77561	NA	-3.28911	0.302265
FBgn0038083	CG5999	0.23	0.06	0.24	0.02	0.05	0.02	0.02	0.07	0.04	0.34	0.06	0	0	0.02	0	0	0	0	0.176667	0.10116	0.03	0.0173205	0.0433333	0.0251661	0.133333	0.181475	0.00666667	0.011547	0	0	-2.08292	0.163526	-1.67321	0.218513	0.37719	0.906705	1.97822	0.33316	-0.252262	0.869887	0.0065742	NA	-4.0919	0.180257	-2.17331	0.557516	-4.38628	0.0281322
FBgn0038084	beat-Vc	1.47	1.53	1.6	0.01	0	0.01	0.05	0.02	0	0	0	0	0.11	0.11	0.4	0	0	0	1.53333	0.0650641	0.00666667	0.0057735	0.0233333	0.0251661	0	0	0.206667	0.167432	0	0	-7.14694	2.8085e-10	-5.6123	1.87464e-14	1.47856	NA	0.0174408	NA	-7.15756	2.38175e-08	-5.01933	0.00413922	NA	NA	-0.822331	NA	-7.9495	3.34928e-10
FBgn0051345	CG31345	0.12	0	0	0.07	0.05	0	0.06	0	0.1	0	0	0	0	0	0	0	0	0	0.04	0.069282	0.04	0.0360555	0.0533333	0.0503322	0	0	0	0	0	0	0.305244	0.93496	0.775493	0.813051	0.436383	NA	-0.880556	NA	-0.712561	NA	NA	NA	NA	NA	-1.69884	NA	-1.46591	NA
FBgn0038087	beat-Va	0.02	0	0.02	0	0	0	0	0	0	0	0	0	0	0	0	0	0	0	0.0133333	0.011547	0	0	0	0	0	0	0	0	0	0	-2.4233	NA	-2.48946	NA	NA	NA	NA	NA	-0.584961	NA	NA	NA	NA	NA	NA	NA	-1.38034	NA
FBgn0038088	CG10126	1.54	1	2.58	3.71	2.83	2.62	7.6	8.14	9.64	6.63	5.83	6.78	3.54	3.53	2.7	0	0	0	1.70667	0.803077	3.05333	0.578302	8.46	1.05698	6.41333	0.510718	3.25667	0.482113	0	0	1.32947	0.00396579	2.64705	3.3173e-14	1.29665	3.15676e-07	0.791034	0.0219411	1.96425	2.70432e-06	-7.54655	6.88001e-09	-8.61057	1.66833e-11	-7.87249	1.29733e-09	-6.64295	3.02939e-06
FBgn0038089	d-cup	0	0	0	0	0	0	0	0	0	0	0	0	0	0	0	0	0	0	0	0	0	0	0	0	0	0	0	0	0	0	NA	NA	NA	NA	NA	NA	NA	NA	NA	NA	NA	NA	NA	NA	NA	NA	NA	NA
FBgn0038090	CG10909	0.07	0	0.09	0	0	0	0	0	0	0	0	0	0	0	0	0	0	0	0.0533333	0.0472582	0	0	0	0	0	0	0	0	0	0	-3.18072	NA	-3.2482	NA	NA	NA	NA	NA	-1.34403	NA	NA	NA	NA	NA	NA	NA	-2.1223	0.600791
FBgn0038092	beat-Vb	0.12	0.09	0.18	0.04	0.01	0	0	0	0.02	0	0	0	0	0.03	0	0	0	0.04	0.13	0.0458258	0.0166667	0.0208167	0.00666667	0.011547	0	0	0.01	0.0173205	0.0133333	0.023094	-2.45657	0.178494	-4.10088	0.0433481	-1.71567	NA	-0.625341	NA	-3.18234	NA	0.967473	NA	0.208655	NA	-0.469017	NA	-2.98235	0.118023
FBgn0040493	grsm	143.64	142.67	129.2	90.54	104.33	86.25	109.38	123.42	97.02	121.68	122.95	109.58	176.91	174.46	159.84	247.82	254.07	251.85	138.503	8.07151	93.7067	9.44682	109.94	13.2089	118.07	7.37993	170.403	9.22977	251.247	3.16838	-0.0726404	0.612177	0.00948181	0.954443	0.0487183	0.81896	0.0565793	0.586662	-0.164308	0.162583	0.414328	9.15899e-13	0.851372	1.30241e-50	0.858059	1.58952e-30	0.686038	1.10839e-13
FBgn0087021	Spc25	57.28	79.31	71.69	18.03	18.25	19.26	24.69	19.45	27.25	68.98	67.64	70.04	104.46	97.57	106.29	103.08	92.39	104.12	69.4267	11.188	18.5133	0.655922	23.7967	3.97599	68.8867	1.20272	102.773	4.59818	99.8633	6.49295	-1.40196	2.54672e-21	-1.19328	3.73612e-12	0.175359	0.449901	1.6127	5.36039e-45	0.0621506	0.661165	-0.180866	0.0107211	0.306518	0.000621582	1.86572	9.45182e-75	0.360119	0.00568964
FBgn0038095	Cyp304a1	0.84	0.5	0.75	0.47	0.16	0.18	0.28	0.45	0.32	0	0	0.3	0.02	0.12	0.04	0	0	0	0.696667	0.176163	0.27	0.173494	0.35	0.0888819	0.1	0.173205	0.06	0.052915	0	0	-0.915352	0.218638	-0.656725	0.272214	0.229903	0.858346	-1.90239	0.244162	-3.06635	0.0102263	-2.91839	0.285881	-3.66701	0.375836	-5.42438	0.00180774	-6.4264	4.83459e-06
FBgn0038097	CG14384	0.39	0.28	0.53	0.14	0.13	0.11	0.23	0.08	0.04	0	0	0	0	0	0	0	0	0	0.4	0.1253	0.126667	0.0152753	0.116667	0.100167	0	0	0	0	0	0	-1.13675	0.371996	-1.46943	0.277567	-0.358667	0.896632	-2.66081	NA	-3.94455	0.0425751	NA	NA	NA	NA	-3.47438	0.204647	-4.71301	0.0106187
FBgn0038098	CG7381	2.73	2.4	3.52	9.63	8.43	7.94	6.58	6.56	6.41	23.87	22.33	25.39	4.8	4.63	5.04	3.25	2.92	3.99	2.88333	0.575529	8.66667	0.869502	6.51667	0.0929157	23.8633	1.53001	4.82333	0.205994	3.38667	0.547936	2.08223	1.3566e-29	1.52109	1.41992e-17	-0.592543	1.77374e-06	1.18014	7.2576e-23	3.11096	6.86605e-81	-0.63666	0.000133752	-3.02889	5.00339e-100	-1.90539	4.35438e-29	0.066979	0.790779
FBgn0038099	CG7091	2.75	2.63	3.91	74.71	72.36	78.68	50.84	59.78	55.08	102.44	97.27	92.86	83.23	87.04	86.05	81.88	97.5	89.98	3.09667	0.706918	75.25	3.19442	55.2333	4.47197	97.5233	4.79502	85.44	1.97689	89.7867	7.81179	5.1006	3.11608e-227	4.50308	8.96091e-166	-0.630934	1.4339e-08	0.0932767	0.365124	5.04129	5.20956e-241	-0.0765327	0.372194	-0.356658	9.28457e-05	-0.314583	0.00217203	4.68182	1.31886e-177
FBgn0038100	Paip2	74.42	104.44	99.2	56.18	48.42	63.5	60.47	65.96	75.43	234.04	247.86	226.44	248.43	240.78	244.96	188.74	141.28	189.88	92.6867	16.0349	56.0333	7.54107	67.2867	7.56772	236.113	10.8595	244.723	3.83049	173.3	27.736	-0.21705	0.229596	-0.107536	0.521044	0.0763794	0.761326	1.78976	8.36623e-53	1.42318	1.45048e-32	-0.641417	3.67091e-12	-0.680526	6.43515e-13	1.05715	2.364e-13	0.736532	2.4391e-06
FBgn0051342	CG31342	55.46	64.44	69.83	52.43	51.04	50.14	58.24	57.3	57.76	118.16	130.53	121.37	104.07	107.93	102.77	139.01	134.07	141.03	63.2433	7.25935	51.2033	1.1537	57.7667	0.470035	123.353	6.41907	104.923	2.68375	138.037	3.58063	0.197402	0.0584613	0.219883	0.0236023	-0.0102058	0.932887	0.987872	2.55914e-50	1.03521	4.97271e-30	0.250842	2.39708e-08	-0.0724943	0.142427	0.864301	9.13818e-55	0.957999	2.5196e-28
FBgn0038102	CG14383	1.5	2.94	2.52	1.46	1.16	1.25	1.07	1.53	1.23	1.14	1.07	0.31	0.47	0.52	0.77	0.42	0.36	0.28	2.32	0.74054	1.29	0.153948	1.27667	0.233524	0.84	0.460326	0.586667	0.160728	0.353333	0.0702377	-0.331326	0.461973	-0.490218	0.26958	-0.190067	0.764624	-0.839142	0.213709	-1.31261	0.0250348	-0.89869	0.271321	-1.52979	0.11178	-2.44926	0.000150674	-2.88537	1.66689e-06
FBgn0041710	yellow-f	4.54	5.91	4.78	0.59	0.5	0.64	0.51	0.7	0.64	0.75	0.07	0.77	0.56	0.7	0.55	0	0	0	5.07667	0.731596	0.576667	0.070946	0.616667	0.0971253	0.53	0.398497	0.603333	0.083865	0	0	-2.64614	1.4668e-16	-2.69715	1.10145e-18	-0.0886819	0.921027	-0.452736	0.646416	-3.29862	3.60581e-10	-5.86682	5.66465e-05	-5.76584	0.00223139	-6.23642	2.25172e-05	-8.9783	4.15472e-13
FBgn0038105	yellow-f2	11.15	16.52	13.73	0.88	1.1	1.44	2.1	1.55	1.61	0.4	0.2	0.36	0.39	0.4	0.49	0.37	0.46	0.26	13.8	2.68568	1.14	0.282135	1.75333	0.301717	0.32	0.10583	0.426667	0.0550757	0.363333	0.100167	-3.08254	7.46e-32	-2.62991	5.43871e-32	0.422113	0.394972	-2.15124	0.00327732	-5.40404	9.06655e-28	-0.427818	0.588721	-0.0658242	0.955926	-2.27992	0.000207292	-5.4998	6.77262e-42
FBgn0038106	CG7488	69.96	63.62	55.52	33.52	35.28	34.81	36.13	33.47	34.09	35.02	31.55	33.02	32.87	36.37	30.12	42.35	48.36	44.61	63.0333	7.23785	34.5367	0.911281	34.5633	1.39174	33.1967	1.74173	33.12	3.13249	45.1067	3.03563	-0.377482	0.0212534	-0.528087	0.000595763	-0.184773	0.10284	-0.338375	0.0048993	-0.862656	4.9038e-08	0.295361	0.0101085	0.20408	0.113719	-0.18687	0.0862377	-0.660383	7.93164e-06
FBgn0265083	CG44194	145.74	78.39	102.73	45.18	42.4	37.11	46.19	48.77	39.87	40.3	36.66	43.15	59.65	56.78	49.45	84.18	97.36	84.69	108.953	34.1036	41.5633	4.09954	44.9433	4.5791	40.0367	3.253	55.2933	5.26	88.7433	7.46661	-0.91087	0.000226527	-0.945972	0.000120796	-0.0685557	0.757582	-0.341598	0.0246216	-1.39667	2.32612e-08	0.530801	3.75478e-06	0.919964	1.75467e-11	0.525342	3.00082e-05	-0.480026	0.0566527
FBgn0038107	CG17327	145.74	78.39	102.73	45.18	42.4	37.11	46.19	48.77	39.87	40.3	36.66	43.15	59.65	56.78	49.45	84.18	97.36	84.69	108.953	34.1036	41.5633	4.09954	44.9433	4.5791	40.0367	3.253	55.2933	5.26	88.7433	7.46661	-0.91087	0.000226527	-0.945972	0.000120796	-0.0685557	0.757582	-0.341598	0.0246216	-1.39667	2.32612e-08	0.530801	3.75478e-06	0.919964	1.75467e-11	0.525342	3.00082e-05	-0.480026	0.0566527
FBgn0038108	CG7518	65.79	55.05	65.55	48.12	46.6	41.09	60.3	58.04	52.51	62.73	64.85	60.5	51.36	56.13	51.7	78.17	77.51	75.87	62.13	6.13263	45.27	3.69891	56.95	4.00775	62.6933	2.17523	53.0633	2.66125	77.1833	1.18429	0.0357382	0.814034	0.217205	0.103853	0.148736	0.187723	0.191398	0.0123805	0.0775409	0.536519	0.394965	9.10861e-13	0.063799	0.195002	0.204577	0.00445024	0.138976	0.24044
FBgn0038110	CG8031	47.41	54.45	52.41	39.98	47.82	42	53.32	54.81	56.53	52.48	56.12	50.47	83.1	76.03	77.77	87.74	86.91	86.38	51.4233	3.62223	43.2667	4.07059	54.8867	1.60637	53.0233	2.86392	78.9667	3.68378	87.01	0.685493	0.249659	0.0460316	0.442974	1.64737e-05	0.158964	0.233164	0.0155734	0.906366	0.117095	0.270397	-0.00623706	0.941158	0.4749	2.42797e-09	0.440918	1.52792e-06	0.588999	1.55986e-13
FBgn0038109	CG11656	11.74	14.07	12.88	1.69	1.5	0.72	1.97	1.71	1.46	0.53	0.54	0.48	0.22	0.19	0.21	0	0	0	12.8967	1.16509	1.30333	0.514036	1.71333	0.255016	0.516667	0.0321455	0.206667	0.0152753	0	0	-2.82382	3.38228e-20	-2.56852	5.51517e-32	0.224627	0.754628	-1.58966	0.0341602	-4.55327	1.72187e-24	-3.96111	0.0455884	-5.3797	0.00277511	-7.02861	5.27774e-07	-9.94893	3.33039e-16
FBgn0020496	CtBP	338.31	433.5	428.73	180.57	191.58	177.74	245.93	234.54	243.12	241	243.6	243.13	320.77	299.56	317.9	322.11	313.92	329.55	400.18	53.634	183.297	7.3118	241.197	5.93359	242.577	1.38551	312.743	11.5069	321.86	7.818	-0.624221	3.37016e-09	-0.379309	0.000287561	0.21187	0.00209227	0.12403	0.0383028	-0.649336	1.20088e-11	-0.102963	0.0098552	0.17392	2.69765e-06	0.246203	6.61317e-07	-0.481072	6.00352e-07
FBgn0283438	CG46280	83.39	102.59	106.04	43.94	46.88	43.98	55.51	55.7	51.03	74.97	79.05	74.9	76.75	76.74	80.59	94.66	92.3	101.15	97.34	12.2036	44.9333	1.68598	54.08	2.64309	76.3067	2.37605	78.0267	2.21992	96.0367	4.5828	-0.612821	6.38307e-09	-0.497052	2.92463e-06	0.0827845	0.493801	0.484076	6.22629e-11	-0.278535	0.00559347	0.156749	0.00346518	0.0978796	0.134442	0.530266	3.71224e-15	-0.186305	0.0692118
FBgn0283439	CG46281	0.86	1.24	0.89	0.51	0.66	0.42	0.57	0.66	0.45	0.31	0.48	0.5	0.64	0.62	0.27	0.22	0.22	0.64	0.996667	0.211266	0.53	0.121244	0.56	0.105357	0.43	0.104403	0.51	0.208087	0.36	0.242487	-0.41618	0.467184	-0.496304	0.361337	-0.113982	0.909315	-0.54373	0.538716	-1.11436	0.0984373	-0.617671	0.499521	-0.504651	0.647062	-1.08285	0.197385	-1.58393	0.0207877
[truncated: 12,792 more rows]
[truncated: 39 more columns]

## Sheet: supplementary file 1b
Supplementary file 1b. E(z)-dependent gene downregulation
[truncated: 426 more rows]

## Sheet: supplementary file 1c
Supplementary file 1c. Mostly heterochromatic GSC genes with high H3K27ac										x=het
[truncated: 106 more rows]

[truncated: 2 more sheets: supplementary file 1d, supplementary file 1e]
